# Supplementary material for: Photoexcited Pd(ii) auxiliaries enable light-induced control in C(sp3)–H bond functionalisation
Source: PubMed Central journal article supplement (PMC8157331; doi:10.1039/c9sc05722f), 2020-01-23
Supplement: SC-011-C9SC05722F-s001.pdf [file SC-011-C9SC05722F-s001.pdf]

## Supporting Information

### Photoexcited Pd(II) Auxiliaries Enable Light-Induced Control in C(sp<sup>3</sup>)-H Bond Functionalisation

Milena L. Czyz,<sup>a</sup> Geethika K. Weragoda,<sup>b</sup> Tyra H. Horngren,<sup>a</sup> Timothy U. Connell,<sup>c</sup> Daniel Gomez,<sup>c</sup> Richard A. J. O'Hair<sup>a\*</sup> and Anastasios Polyzos<sup>a,b\*</sup>

<sup>a</sup> School of Chemistry, The University of Melbourne, Melbourne, Victoria 3010, Australia

<sup>b</sup> CSIRO Manufacturing, Research Way, Clayton VIC 3168, Australia, Victoria 3000, Australia

<sup>c</sup> RMIT University, Melbourne

\*Correspondence to: [anastasios.polyzos@unimelb.edu.au](mailto:anastasios.polyzos@unimelb.edu.au) and [rohair@unimelb.edu.au](mailto:rohair@unimelb.edu.au)

# Contents

|                                                                                                       |     |
|-------------------------------------------------------------------------------------------------------|-----|
| Experimental Procedures .....                                                                         | 3   |
| General Information.....                                                                              | 3   |
| Steady-State UV-Vis Spectroscopy .....                                                                | 5   |
| Emission Lifetime Decay .....                                                                         | 6   |
| Stern-Volmer Fluorescence Quenching Studies .....                                                     | 7   |
| Electrochemistry .....                                                                                | 9   |
| Palladacycle 1 .....                                                                                  | 9   |
| Reduction Potentials of Halogenating Reagents.....                                                    | 10  |
| Gas-Phase Mass Spectrometry Experiments (Photoreaction Screening) .....                               | 11  |
| Computational Studies.....                                                                            | 16  |
| Thermodynamics of the Reductive Elimination Step .....                                                | 21  |
| Cartesian coordinates and energies for all DFT calculated structures using M06/6-311G(d)/SDD(Pd)..... | 24  |
| Optimisation and Control Experiments .....                                                            | 40  |
| Importance of Light, Oxidant and Halogenation Source.....                                             | 40  |
| Solvent Effect .....                                                                                  | 40  |
| Homolysis of Perfluorobutyl Iodide 2 Under Blue Light Irradiation .....                               | 41  |
| Stability of Palladacycle in the Presence of Iodinated Product 3 Under Blue Light Irradiation .....   | 41  |
| Synthesis and Characterization.....                                                                   | 42  |
| General Procedure for the Preparation of <i>N</i> -(5-Chloroquinolin-8-yl) Amides .....               | 43  |
| Substrate Characterisation Data.....                                                                  | 44  |
| General Procedure for the Preparation of the Charge-Tag Complex .....                                 | 49  |
| General Procedure for the Preparation of Cyclopalladated Complexes .....                              | 50  |
| Cyclopalladated Complexes Characterisation Data.....                                                  | 51  |
| General Procedure for the Iodination Reaction .....                                                   | 53  |
| Product Characterisation Data .....                                                                   | 54  |
| General Procedure for the Chlorination Reaction .....                                                 | 59  |
| Product Characterization Data .....                                                                   | 60  |
| General Procedure for the Bromination Reaction .....                                                  | 62  |
| Product Characterisation Data .....                                                                   | 63  |
| General Procedure for the Removal of Aminoquinoline Directing Group <sup>[8]</sup> .....              | 65  |
| Product Characterisation Data .....                                                                   | 66  |
| References.....                                                                                       | 66  |
| <sup>1</sup> H and <sup>13</sup> C NMR Spectra .....                                                  | 67  |
| X-Ray Data .....                                                                                      | 151 |

## Experimental Procedures

### General Information

Synthesis and General Instrumentation: Unless otherwise stated, reagents and solvents were purchased from commercial sources and used without further purification. Cholic acid derivative **21a** was synthesized according to a literature procedure.<sup>[1]</sup>

Analytical Thin Layer Chromatography (TLC) was carried out using aluminium-backed Merck Kieselgel KG60 F254 silica plates. The plates were visualized by irradiation with short-wave ultraviolet light. Flash chromatography was performed on Grace Davidson Davisil LC60A 40-63 micron silica gel.

All light-promoted halogenation reactions were performed using a custom-built blue LED photoreactor (Figure S1). The custom reactor was comprised of a square metal frame (100 mm × 110 mm) with 14 blue LEDs (2 × SP-02-V4 LED assembly, each consisting of 7 LXML-PR02-A900 Royal-Blue LUXEON Rebel ES LEDs; [www.luxeonstar.com](http://www.luxeonstar.com)). The photoreactor was fitted with PC cooling fans and heat sinks for temperature control (internal temperature of the reactor typically reaches  $27 \pm 5$  °C overnight). The power of the light source can be varied using an intensity control.

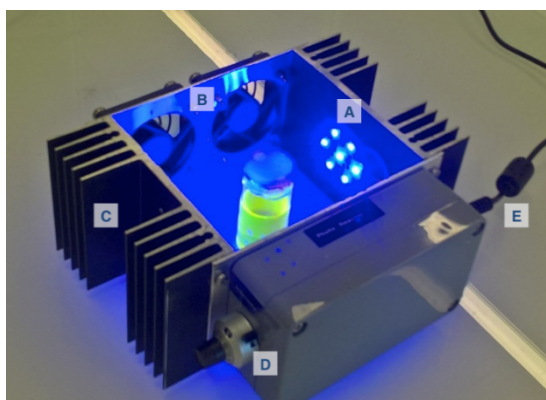

**Figure S1.** Custom-built LED photoreactor; a) blue LED assembly; b) PC cooling fans; c) heat sinks; d) intensity control; e) 12 V power supply.

<sup>1</sup>H NMR and <sup>13</sup>C NMR spectra were recorded on Bruker 400 Ultrashield (400 MHz), Bruker 500, Ascend 400 (400 MHz) or Varian MR-400. Chemical shifts are expressed in parts per million (PPM) and are referenced to the internal solvent peaks.

Mass spectrometric analyses were performed on a Thermo Scientific Q Exactive mass spectrometer fitted with an ASAP ion source. Positive ions were recorded in an appropriate mass range at 140,000 mass resolution. The APCI probe was used without flow of solvent. The nitrogen nebulizing/desolvation gas used for vaporization was heated to 350 °C in these experiments. The sheath gas flow rate was set to 25, the auxiliary gas flow rate to 5 and the sweep gas flow rate to 2 (all arbitrary units). The discharge current was 4 mA and the capillary temperature was 320 °C.

UV-Vis Spectroscopy: Absorption spectra were measured using a Perkin Elmer Lambda 1050 spectrometer. Steady-state luminescent spectra were recorded using a Perkin Elmer LS50 fluorimeter. Samples were excited at 400 nm, slit widths were 2.7 nm and the area under the spectra were used for determining the Stern-Volmer quenching values.

Electrochemistry: The cell comprised a cylindrical glass vessel with a flat base and custom-built Teflon lid<sup>[2]</sup> with holes to fit the electrodes (glassy carbon working (CH Instruments), platinum wire counter and either silver wire or 'leakless' Ag/AgCl (eDAQ) reference). The cell was housed in a light-tight Faraday cage. Potentials were applied using an Autolab PGSTAT204 potentiostat, and referenced *in situ* to the ferrocenium/ferrocene ( $\text{Fc}^{+/0}$ ) couple, and converted to the reported reference (SCE) using  $\text{Fc}^{+/0} = +0.4 \text{ V}$ .<sup>[3]</sup> Freshly distilled acetonitrile with 0.1 M TBAPF<sub>6</sub> supporting electrolyte was used as the solvent. Electrodes were cleaned/polished prior to each experiment. The working electrodes were polished using 0.05  $\mu\text{m}$  alumina powder on a felt pad with deionized water. All electrodes were rinsed with deionized water, ethanol and acetone. The solvent was degassed with nitrogen or argon for 5 minutes.

## Steady-State UV-Vis Spectroscopy

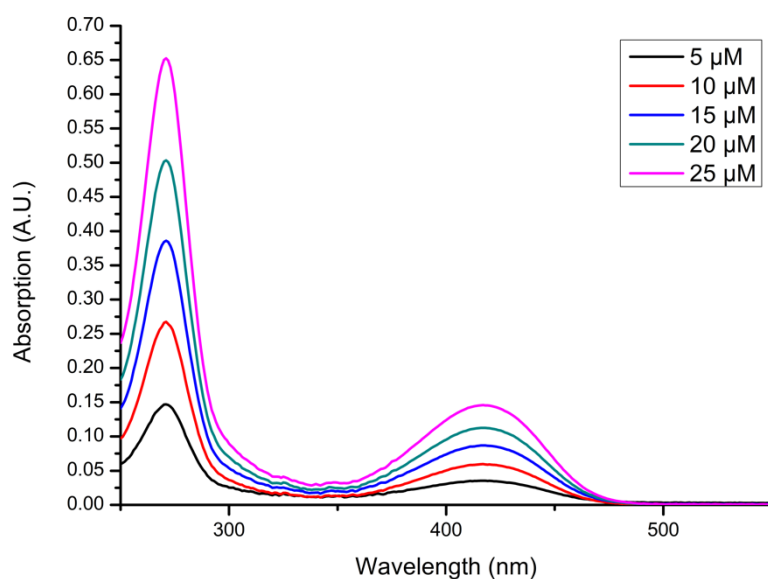

**Figure S2:** Steady-state absorption spectra of palladacycle **1** at different concentrations, collected at room temperature in acetonitrile. The stock solution of palladacycle **1** in acetonitrile (0.01 M) was diluted to a given concentration in volumetric flasks, and then transferred to a septum-capped quartz cuvette.

**A**

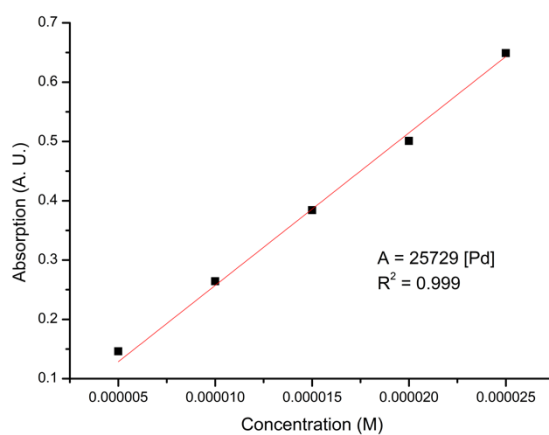

**B**

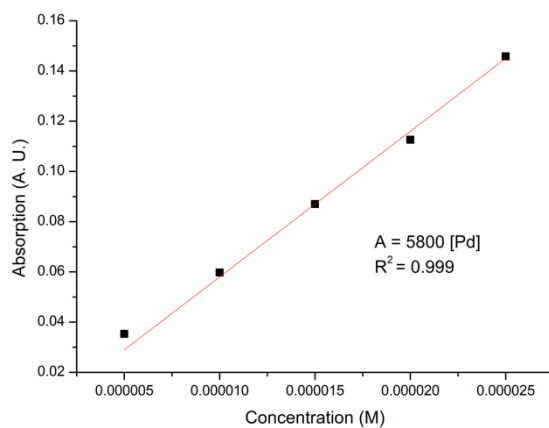

**Figure S3:** Extinction coefficient calibration curve at 272 nm (A) and 417 nm (B) for palladacycle **1** in acetonitrile.

The emission spectra were recorded under air (septum-capped quartz cuvette prior to any degassing) to give a single emission band at  $\lambda_{\text{max}} = 530$  nm. The sample was then sparged with argon for approximately 15 minutes, while care was taken to avoid evaporation of solvent. Emission at  $\lambda_{\text{max}} = 530$  nm was found not to be oxygen-sensitive; however, a second, overlapping emission band at  $\lambda_{\text{max}} = 625$  nm was observed in the absence of oxygen.

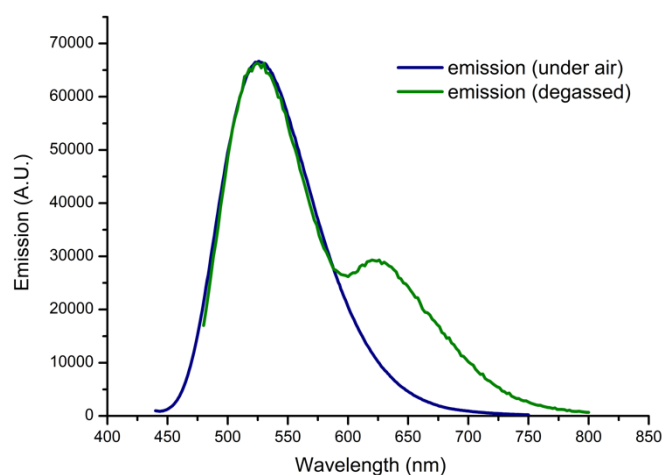

**Figure S4:** Photoluminescence emission spectra of palladacycle **1** in acetonitrile (20  $\mu\text{m}$ ) collected at room temperature, under air (blue) and after sparging with argon for 15 minutes (green). Excitation wavelength = 430 nm. Slit widths = 4 nm.

## Emission Lifetime Decay

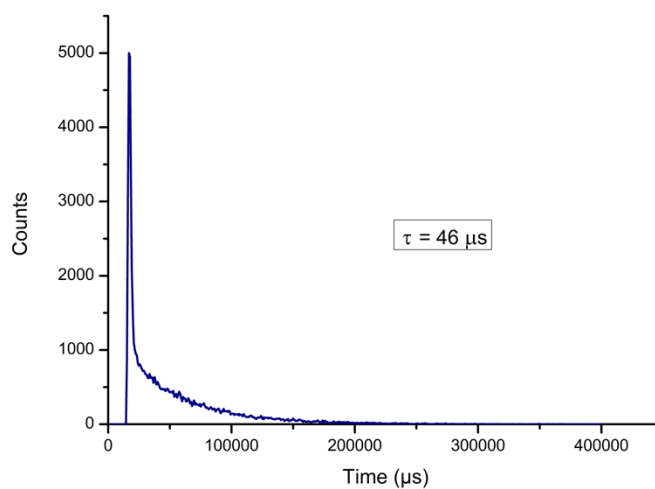

**Figure S5:** Emission lifetime decay of palladacycle **1** at 625 nm.

## Stern-Volmer Fluorescence Quenching Studies

Samples for steady-state photoluminescence were prepared in the following manner: quencher was added to an acetonitrile solution of palladacycle **1** (0.01 mM) and made to a given concentration in a volumetric flask. The solution was then transferred to a septum-capped quartz cuvette. To observe quenching of the triplet excited state, the solution was deoxygenated immediately prior to measurement by sparging with argon for approximately 10 min. Fluorescence quenching studies were performed under air.

**A**

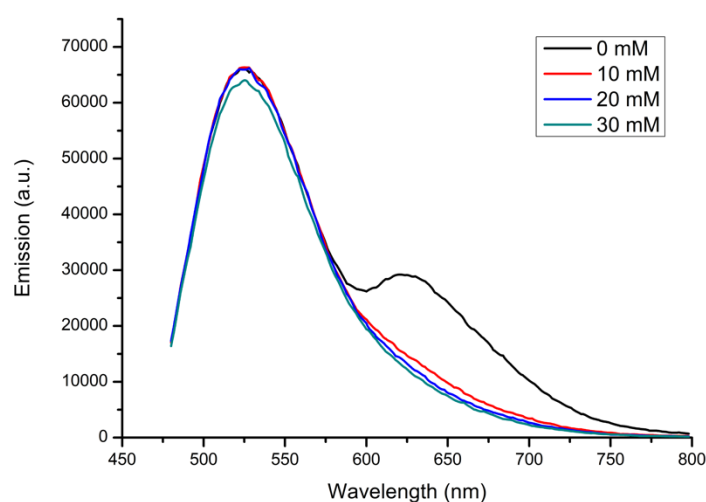

**B**

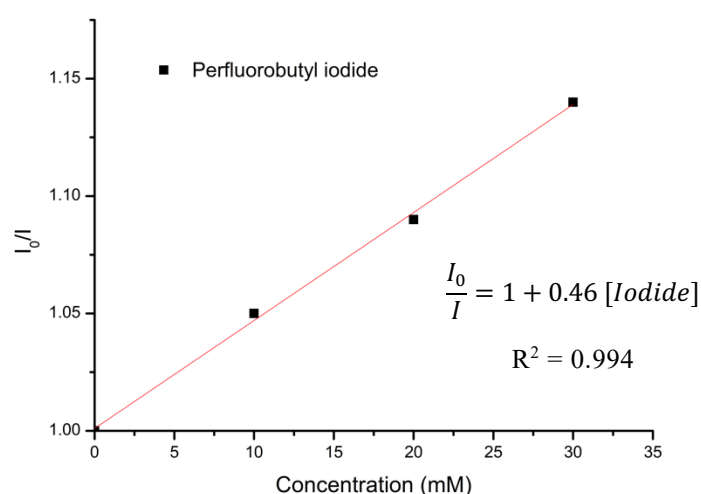

C

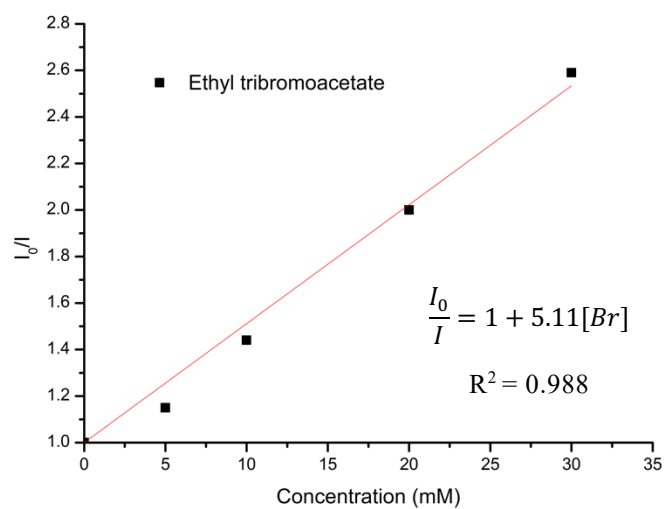

D

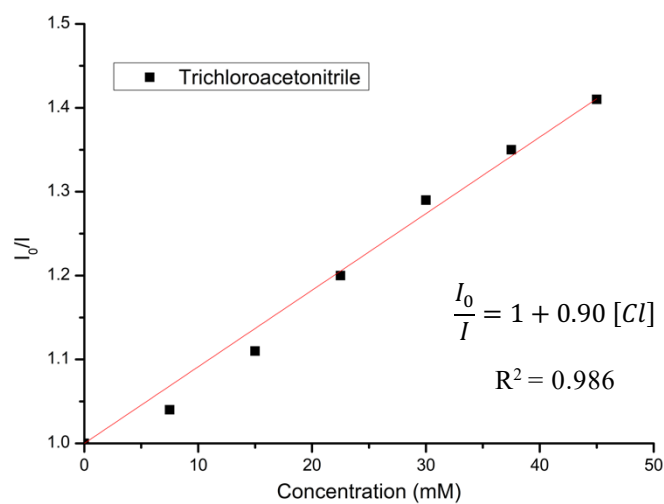

**Figure S6:** (A) Photoluminescence quenching of the singlet and triplet emission of palladacycle **1** by perfluorobutyl iodide **2**. (B) Stern-Volmer plot palladacycle **1** fluorescence intensity in the presence of perfluorobutyl iodide **2**. (C) Stern-Volmer plot palladacycle **1** fluorescence intensity in the presence of ethyl tribromoacetate **11**. (D) Stern-Volmer plot palladacycle **1** fluorescence intensity in the presence of trichloroacetonitrile **12**.



## Electrochemistry

### Palladacycle 1

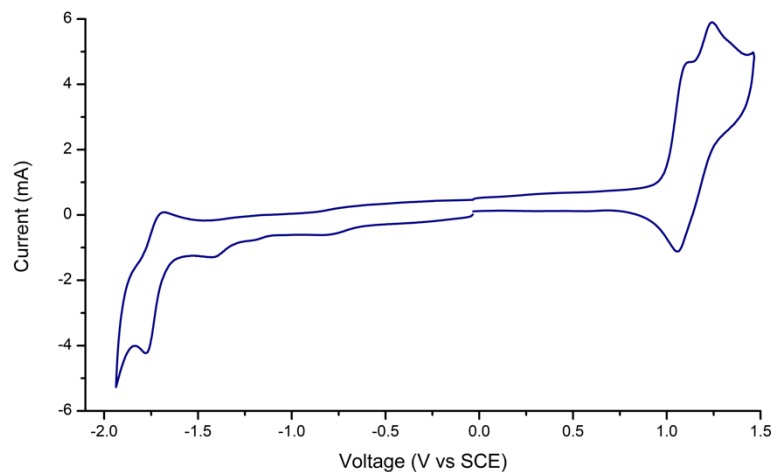

**Figure S7:** Cyclic voltammogram of palladacycle **1** (1  $\mu\text{m}$ ) measured in degassed acetonitrile ( $\text{Bu}_4\text{NPF}_6$  as the supporting electrolyte), scan rate =  $0.1 \text{ Vs}^{-1}$ , reported relative to SCE using  $\text{Fe}^{+/0}$  couple as an internal standard; reference electrode  $\text{Ag}^+/\text{Ag}$ , working electrode: glassy carbon; auxiliary electrode: Pt wire.

Two closely overlapping oxidation waves were observed at  $E_p = 1.10$  and  $1.24 \text{ V}$  and a reduction wave was observed at  $E_p = -1.78 \text{ V}$ .  $\Delta E_p$  values, ( $\Delta E_p > 0.059$ ) suggest that both oxidation and reduction are quasi-reversible one-electron processes.<sup>[4]</sup>

**Table S1:** Electrochemical data for palladacycle **1**

| Sweep rate       | $E_{pc}$ | $E_{pa}$ | $\Delta E_p$ |
|------------------|----------|----------|--------------|
| <b>Oxidation</b> |          |          |              |
| <b>0.1</b>       | 1.10     | 1.03     | 0.070        |
|                  | 1.24     | -        | -            |
| <b>Reduction</b> |          |          |              |
| <b>0.1</b>       | -1.69    | -1.78    | 0.086        |

## Reduction Potentials of Halogenating Reagents

A

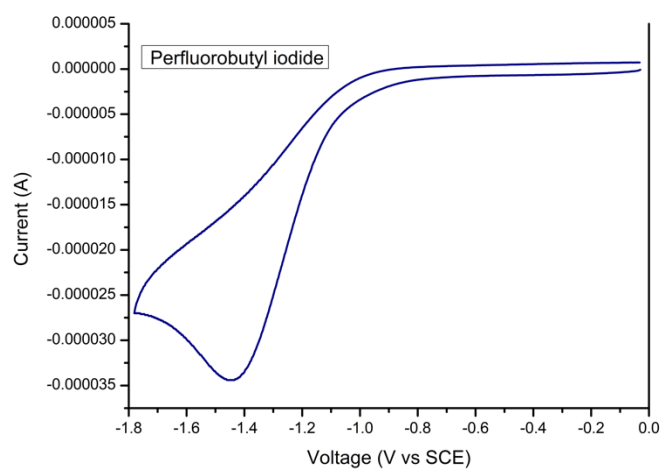

B

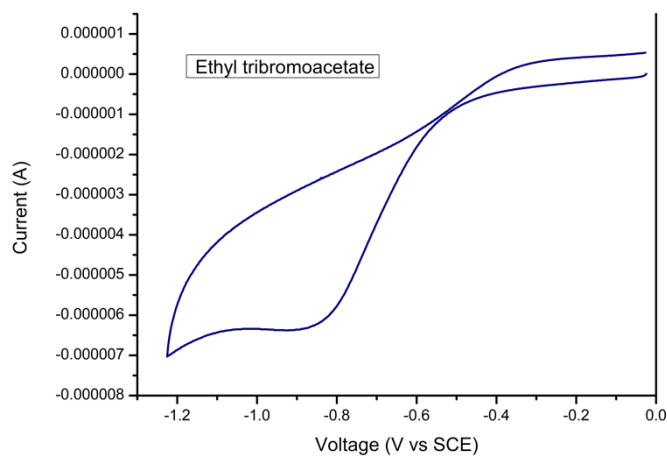

C

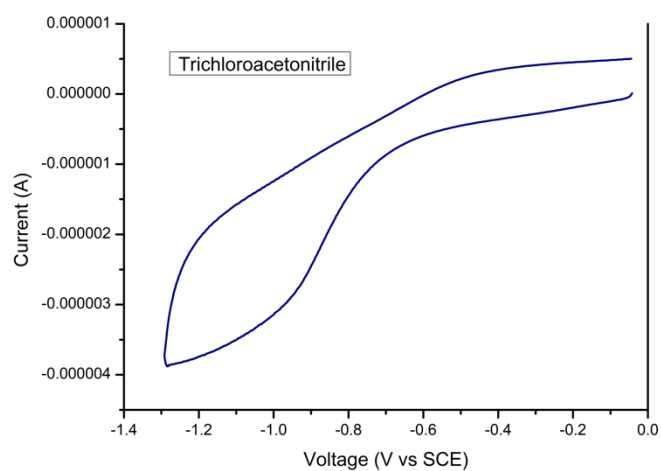

**Figure S8:** Cyclic voltammograms of perfluorobutyl iodide (A), ethyl tribromoacetate (B) and trichloroacetonitrile (C) measured in acetonitrile ( $\text{Bu}_4\text{NPF}_6$  as the supporting electrolyte), scan rate =  $0.1 \text{ Vs}^{-1}$ , reported relative to SCE using  $\text{Fe}^{+0}$  couple as an internal standard; reference electrode  $\text{Ag}^+/\text{Ag}$ , working electrode: glassy carbon; auxiliary electrode: Pt wire.

## Gas-Phase Mass Spectrometry Experiments (Photoreaction Screening)

The experiments were conducted using two different mass spectrometers equipped with electrospray ionization (ESI) sources. ESI high resolution mass spectra (HRMS) were collected on a Thermo Orbitrap Fusion Lumos mass spectrometer. Tandem mass spectrometry experiments (MS/MS) were performed on a Thermo Scientific (Bremen, Germany) linear ion trap (LTQ). For both sets of mass spectrometry experiments the charge tag complex **4** was applied using the standard iodination protocol in continuous flow (20 min retention time), which was then infused directly into the ESI source to access online reaction monitoring platform (Figure S9). The reaction mixture was prepared in acetonitrile (100  $\mu$ M) and pumped into the electrospray source through the 448 nm LED photoreactor (Figure S1). The progress of the reaction was monitored (I) in the absence of oxone and (II) in the presence of oxone. Furthermore MS/MS data were collected to gain structural information of the newly formed intermediates by fragmenting the precursor ions.

### *Typical electrospray source conditions were:*

**CID:** Sheath Gas = 10 arbitrary units, Auxiliary Gas = 5 arbitrary units, Sweep Gas = 0 arbitrary units, Spray Voltage = 4 kV, Capillary Temp. = 250  $^{\circ}$ C, Capillary Voltage = 2 V, Tube Lens Voltage = 75 V. The precursor ion was mass selected with a window of 1  $m/z$  and collision induced dissociation was carried out using the helium bath gas by activating the ion with an activation time of 30 ms. A normalized collision energy (NCE) was chosen to deplete the precursor ion to 10%.

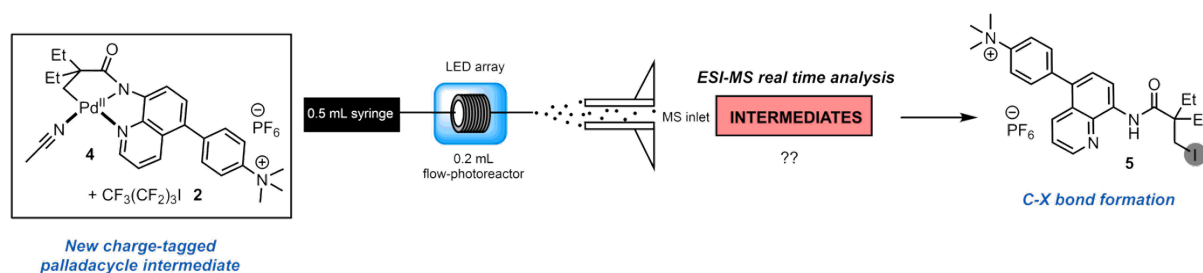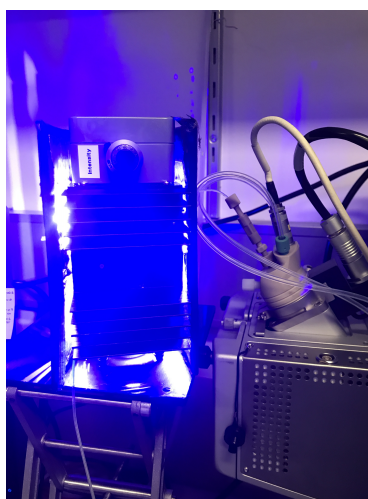

**Figure S9:** Schematic representation of the real-time photoreaction screening platform using the charge tagged palladacycle **4**. The progress of the reaction and intermediates were monitored at 100  $\mu$ M concentration in acetonitrile on the positive-ion mode with the 448 nm (15 W) blue LED photoreactor.

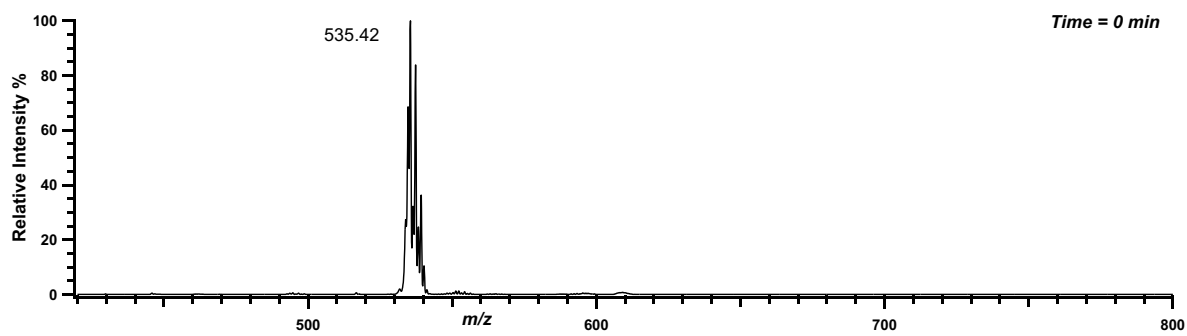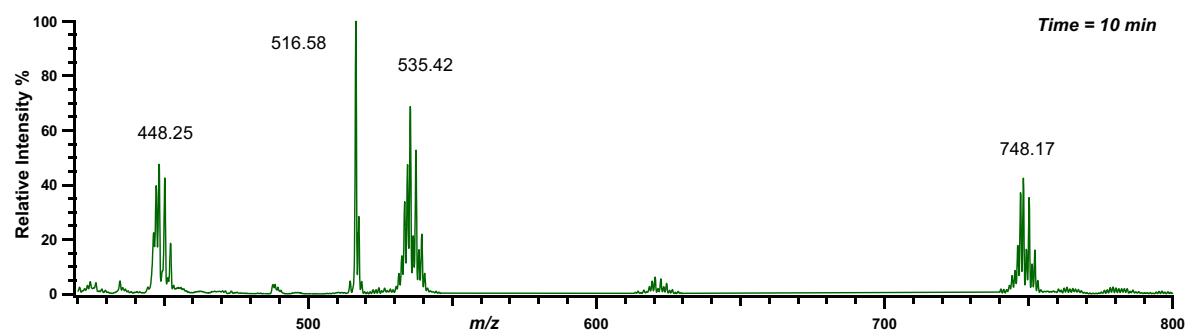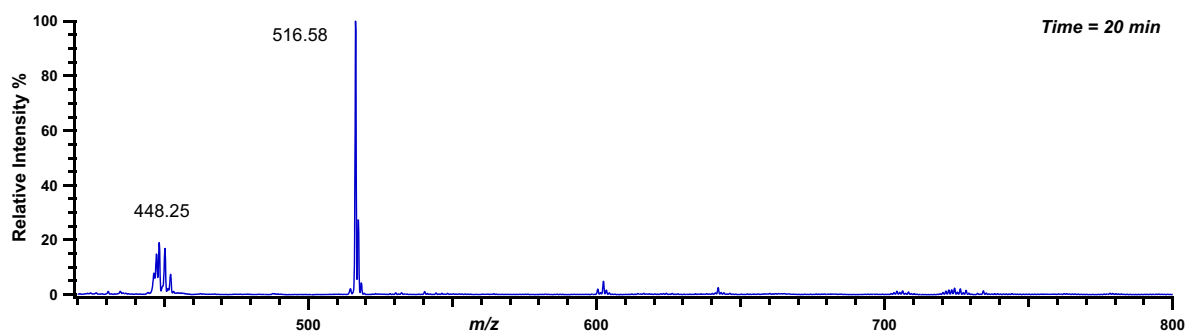

**Figure S10:** ESI-HRMS used to monitor the progress of the reaction in the absence of oxone: Mass spectra of the reaction mixture taken at different time points: (top)  $t = 0$  min; (middle)  $t = 10$  min and (bottom)  $t = 20$  min.

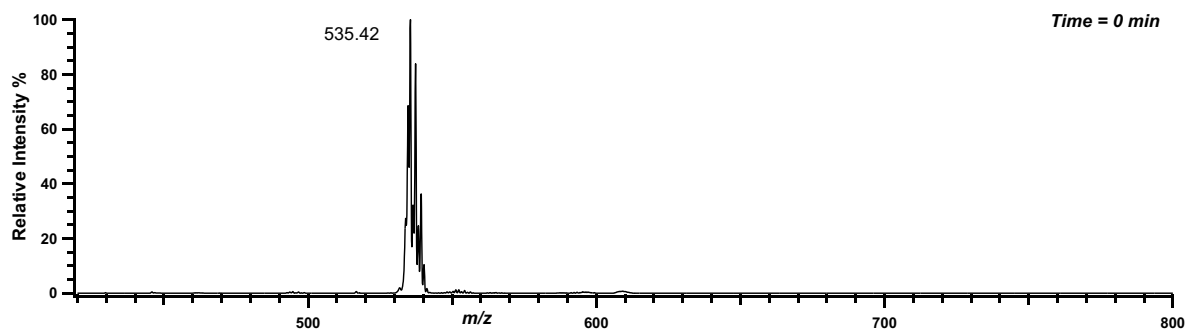

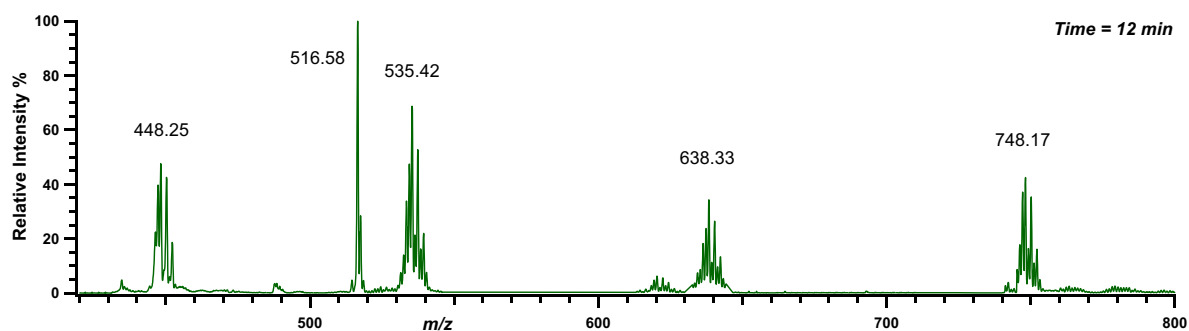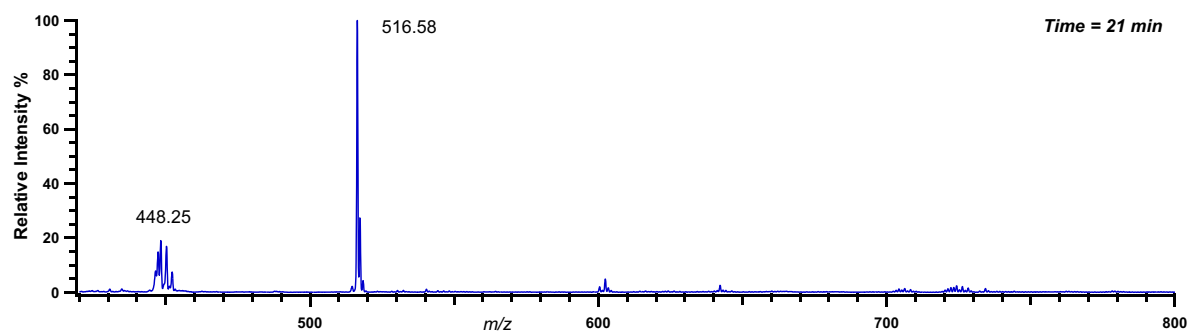

**Figure S11:** ESI-HRMS used to monitor the progress of the reaction in the presence of oxone: Mass spectra of the reaction mixture taken at different time scales (top)  $t = 0$  min; (middle)  $t = 12$  min and (bottom)  $t = 21$  min.

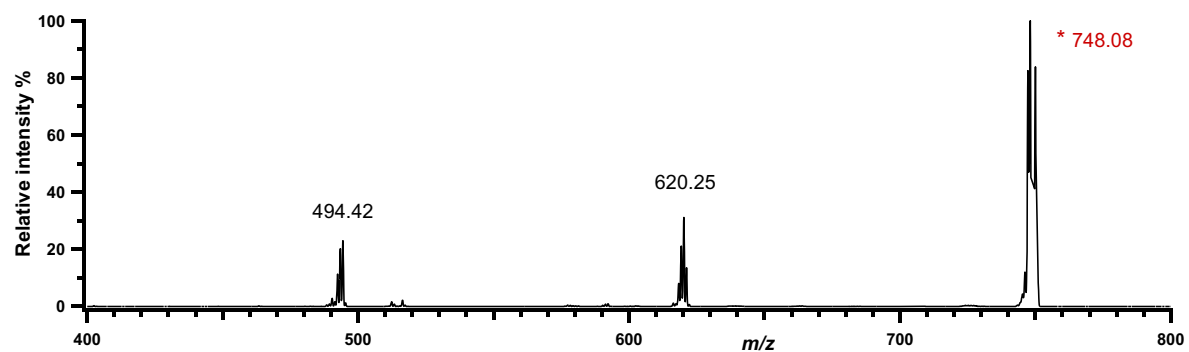

**Figure S12:** CID spectrum of palladium complex **6** at  $m/z$  748, at a normalized collision energy of 10. The mass-selected precursor ions are designated by \*.

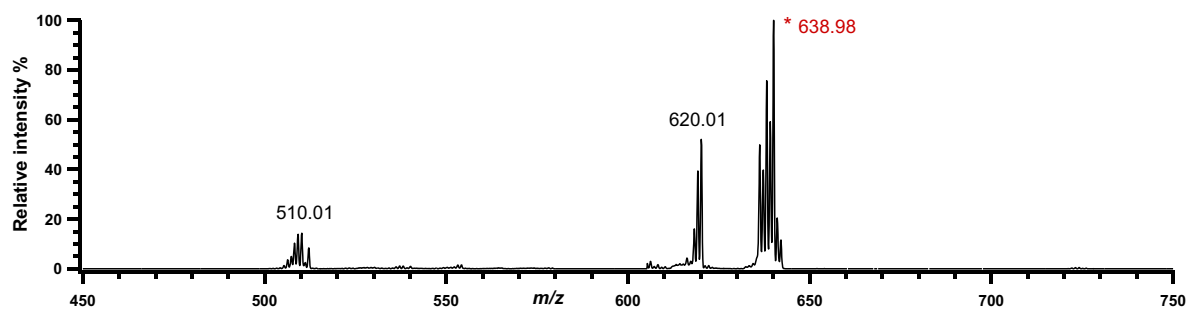

**Figure S13:** CID spectrum of palladium complex **8** at  $m/z$  638, at a normalized collision energy of 12. The mass-selected precursor ions are designated by \*.

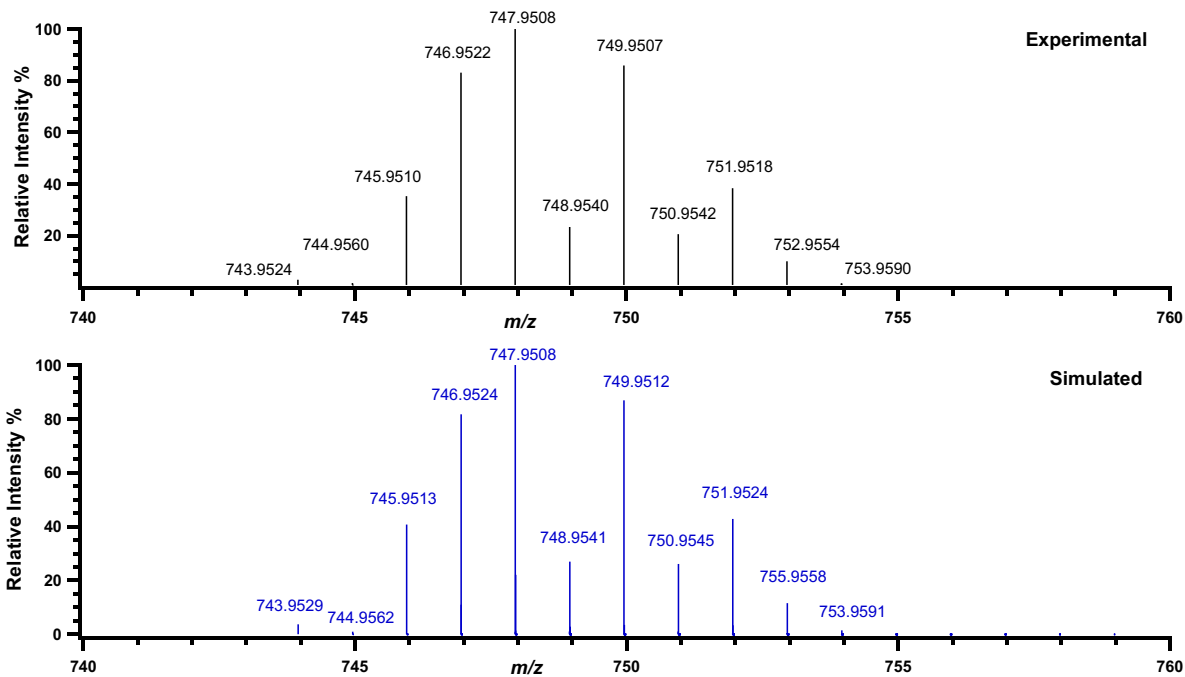

Figure S14: High resolution (black) and simulated (blue) mass spectra of the ion at  $m/z$  748.

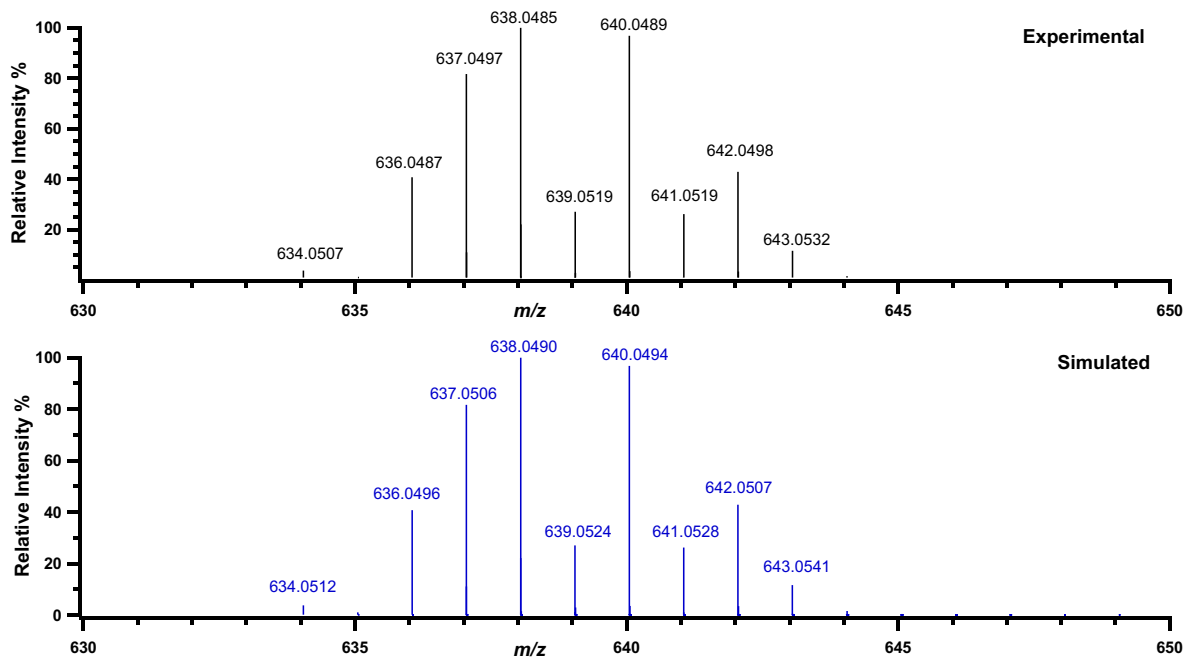

Figure S15: High resolution (black) and simulated (blue) mass spectra of the ion at  $m/z$  638.

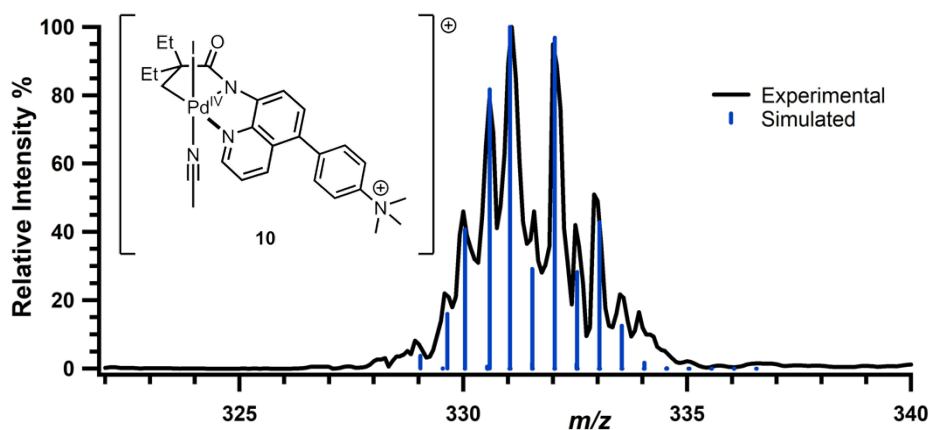

**Figure S16:** Low resolution (black) and simulated mass spectra of the ion at  $m/z$  331.

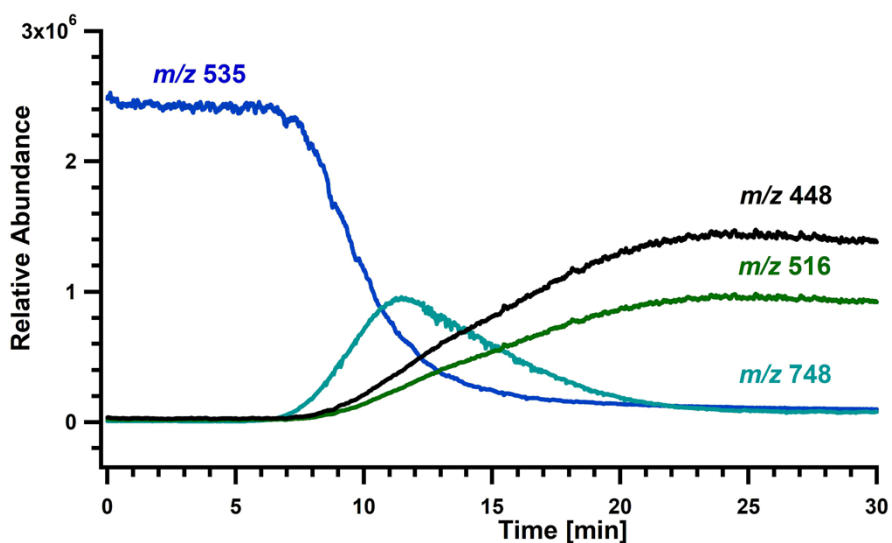

**Figure S17:** Mass spectra traces of relative abundance (of substrate, intermediates and product) vs time for the iodination reaction run in the *absence* of oxone.

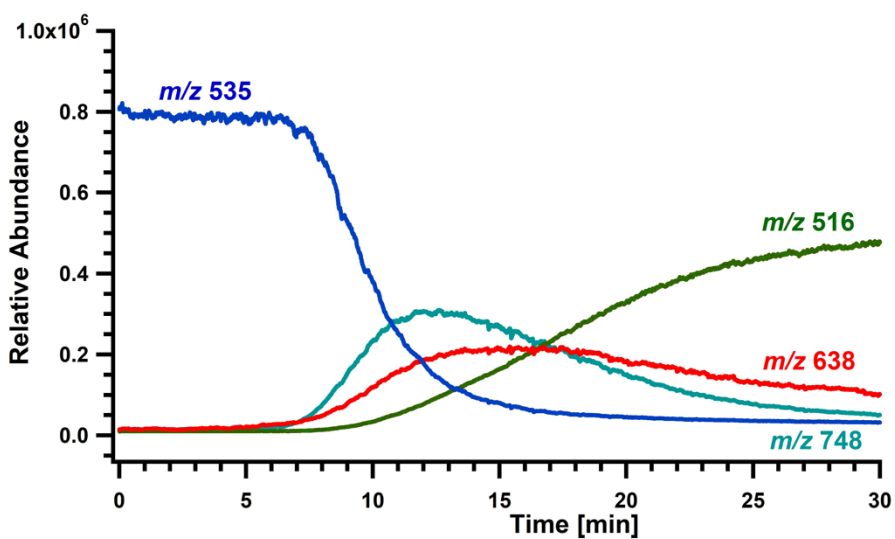

**Figure S18:** Mass spectra traces of relative abundance (of substrate, intermediates and product) vs time for the iodination reaction run in the *presence* of oxone.

## Computational Studies

Density Functional Theory (DFT) calculations were carried out with the Gaussian09<sup>[5]</sup> program. Ground state singlet optimizations were performed on the crystal structure with M06 functional. SDD basis set was chosen for Pd and I while 6-311+G(d) was used for the other atoms. The CPCM formalism for the Self Consistent Reaction Field (SCRF) model of solvation was employed to account for solvation in acetonitrile. All ground and transition states were verified by vibrational frequency analysis at the same level of theory, with all minima showing no imaginary frequencies and all transition states showing only one imaginary frequency. Intrinsic reaction coordinate (IRC) calculations were used to confirm the connectivity between transition structures and minima. The cartesian coordinates and corresponding energies for all optimized ground and transition state structures, including the imaginary frequencies of the transition states are available in the Supporting Information.

Time-dependent density functional theory (TD-DFT) calculations were performed on the ground state optimized structure to probe the nature of the electronic transitions in acetonitrile. Different combinations of functionals (M06,  $\omega$ B97X-D, B3LYP) and basis sets were tested and compared with the experimental absorption spectrum. M06/6-311+G(d)/SDD(Pd) provided the best reproducible spectrum to the experimental absorption spectrum (Figure S19).

Molecular orbital analysis were performed at the BP86/def2-TZVP level,<sup>[6]</sup> which has been shown to give realisable results. QMForge program was used to analyse the molecular orbitals at the ground state and the triplet excited states.

**Table S2:** Comparison of bond lengths and bond angles of the crystal structure of the palladacycle **1** with the DFT computed ground state optimised structures at different level of theories and 6-311+G(d)/SDD(Pd) basis set.

| Bond Length | Crystal Structure | M06  | B3LYP | $\omega$ B97X-D |
|-------------|-------------------|------|-------|-----------------|
| Pd-N40      | 1.96              | 1.97 | 1.20  | 1.98            |
| Pd-N39      | 2.11              | 2.14 | 2.19  | 2.17            |
| Pd-N41      | 2.02              | 2.03 | 2.04  | 2.04            |
| Pd-C17      | 2.01              | 2.02 | 2.03  | 2.01            |
| N40-C15     | 1.37              | 1.36 | 1.37  | 1.36            |
| C15-O42     | 1.23              | 1.23 | 1.23  | 1.22            |
| N40-C13     | 1.39              | 1.39 | 1.39  | 1.38            |
| C13-C11     | 1.38              | 1.38 | 1.39  | 1.38            |
| C9-C11      | 1.40              | 1.40 | 1.40  | 1.40            |
| C8-C9       | 1.37              | 1.36 | 1.37  | 1.36            |
| C7-C8       | 1.40              | 1.41 | 1.41  | 1.41            |
| C7-C14      | 1.41              | 1.41 | 1.42  | 1.41            |
| C14-N39     | 1.37              | 1.36 | 1.37  | 1.36            |
| N39-C1      | 1.32              | 1.32 | 1.32  | 1.31            |
| C1-C3       | 1.39              | 1.40 | 1.40  | 1.40            |
| C3-C5       | 1.35              | 1.36 | 1.37  | 1.36            |



|                |        |        |        |        |
|----------------|--------|--------|--------|--------|
| C5-C7          | 1.42   | 1.41   | 1.41   | 1.41   |
| C8-Cl          | 1.74   | 1.75   | 1.76   | 1.75   |
| C15-C16        | 1.53   | 1.53   | 1.76   | 1.53   |
| C16-C17        | 1.54   | 1.54   | 1.54   | 1.54   |
| Bond Angle     |        |        |        |        |
| N40-Pd-C17     | 83.72  | 83.77  | 83.90  | 83.78  |
| N39-Pd-N40     | 81.01  | 79.95  | 79.73  | 80.00  |
| Pd-N40-C15-O42 | 179.25 | 179.43 | 179.59 | 178.70 |

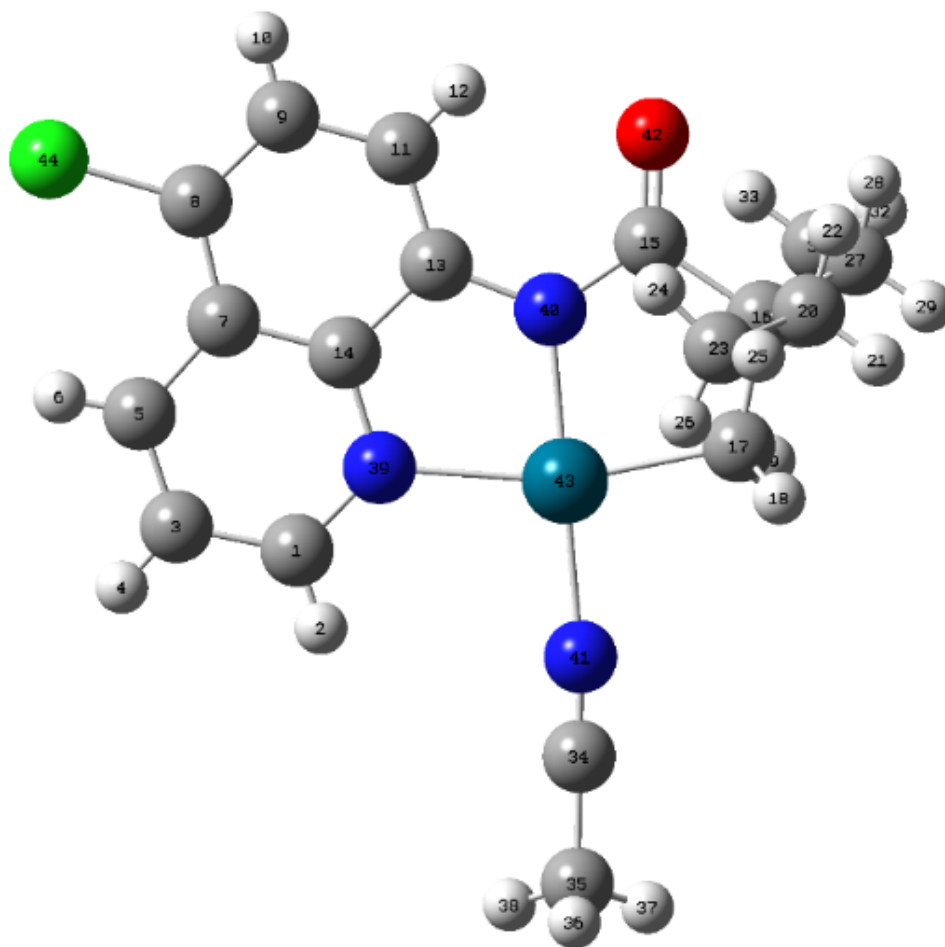

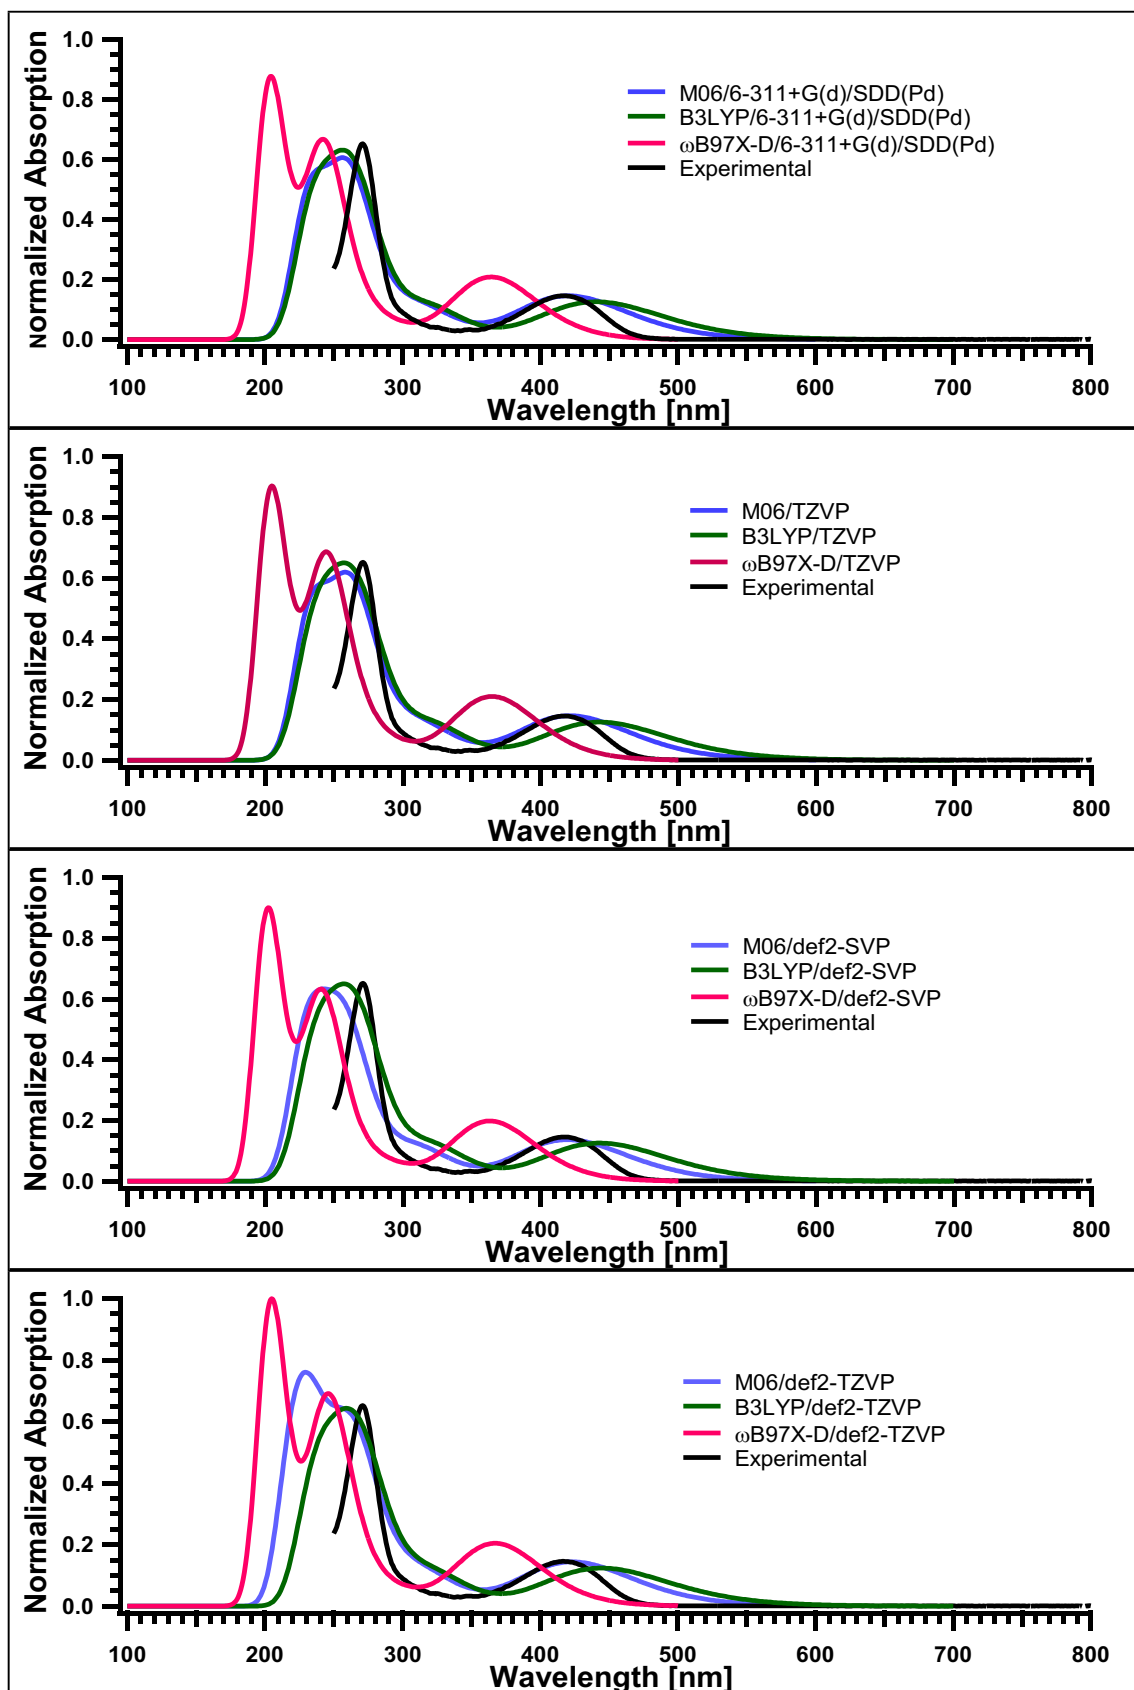

**Figure S19:** Comparison of experimental absorption spectrum with the TD-DFT spectra of palladacycle 1 calculated at various level of theories and basis sets.

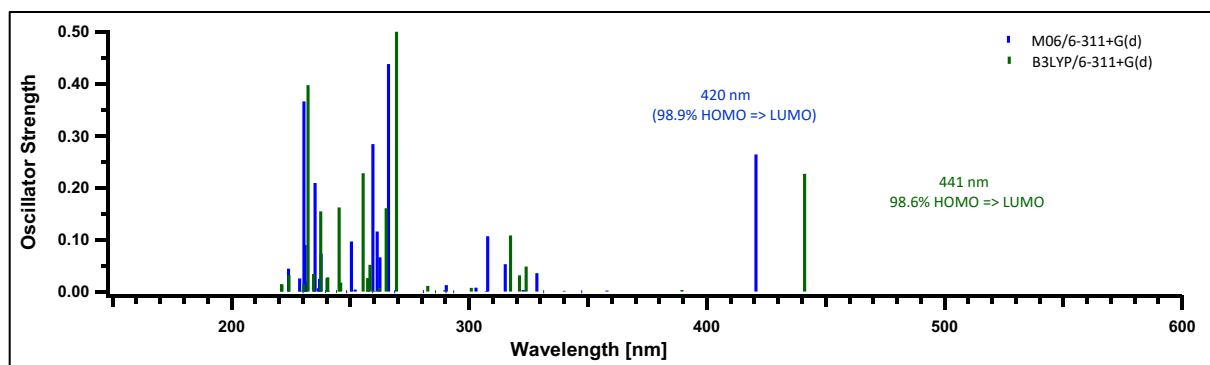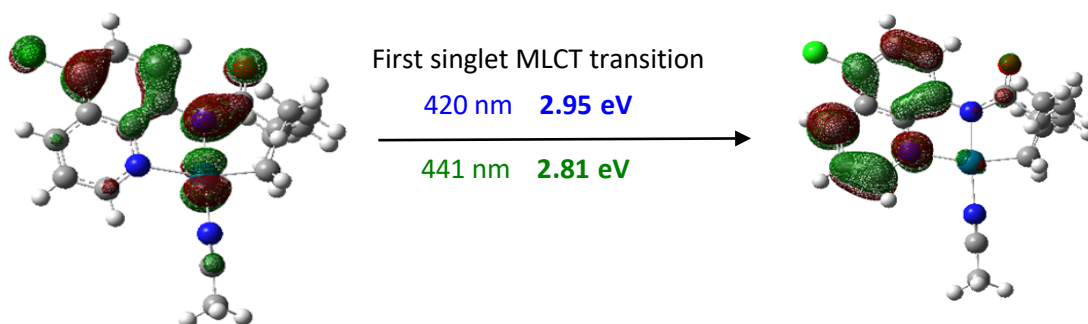

### DFT computed values

Method 1: M06 = 2.95 eV

Method 2: B3LYP = 2.81 eV

### Value derived from the intersection of the excitation and emission profiles

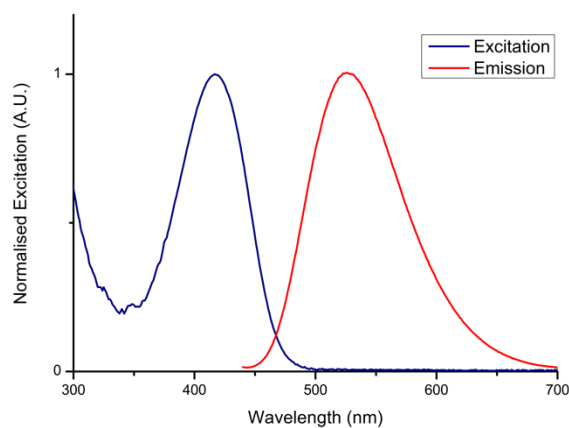

Intersection  $\lambda = 467$  nm

467 nm = 2.66 eV

### Value derived from the electrochemical peak potentials<sup>[7]</sup> (see Figure S6)

$$\begin{aligned}
 E_{\text{MLCT}} &= -E_{\text{P1}} + E_{\text{P2}} \\
 &= -1.10 \text{ V} - 1.78 \text{ V} \\
 &= -2.88 \text{ V}
 \end{aligned}$$

**Figure S20:** Comparison of first singlet MLCT transition (<sup>1</sup>MLCT) energy calculated using TD-DFT method, intersection of the absorption and singlet emission profiles, and electrochemical peak potentials. (a) <sup>1</sup>MLCT transition calculated using M06/6-311G(d)/SDD(Pd) [Blue] and B3LYP/6-311G(d)/SDD(Pd) [Green] (b) Molecular orbitals for first HOMO-LUMO transition at the visible manifold (c) electrochemical peak potentials of palladacycle **1**.

**Table S3:** Calculated molecular orbital energies (BP86/def2-TZVP)

| Orbital  | Energy (eV) |
|----------|-------------|
| LUMO + 6 | -0.588      |
| LUMO + 5 | -0.936      |
| LUMO + 4 | -1.208      |
| LUMO + 3 | -1.401      |
| LUMO + 2 | -1.578      |
| LUMO + 1 | -1.729      |
| LUMO     | -2.756      |
| HOMO     | -4.71       |
| HOMO - 1 | -5.028      |
| HOMO - 2 | -5.153      |
| HOMO - 3 | -5.559      |
| HOMO - 4 | -5.905      |
| HOMO - 5 | -5.959      |
| HOMO - 6 | -6.378      |

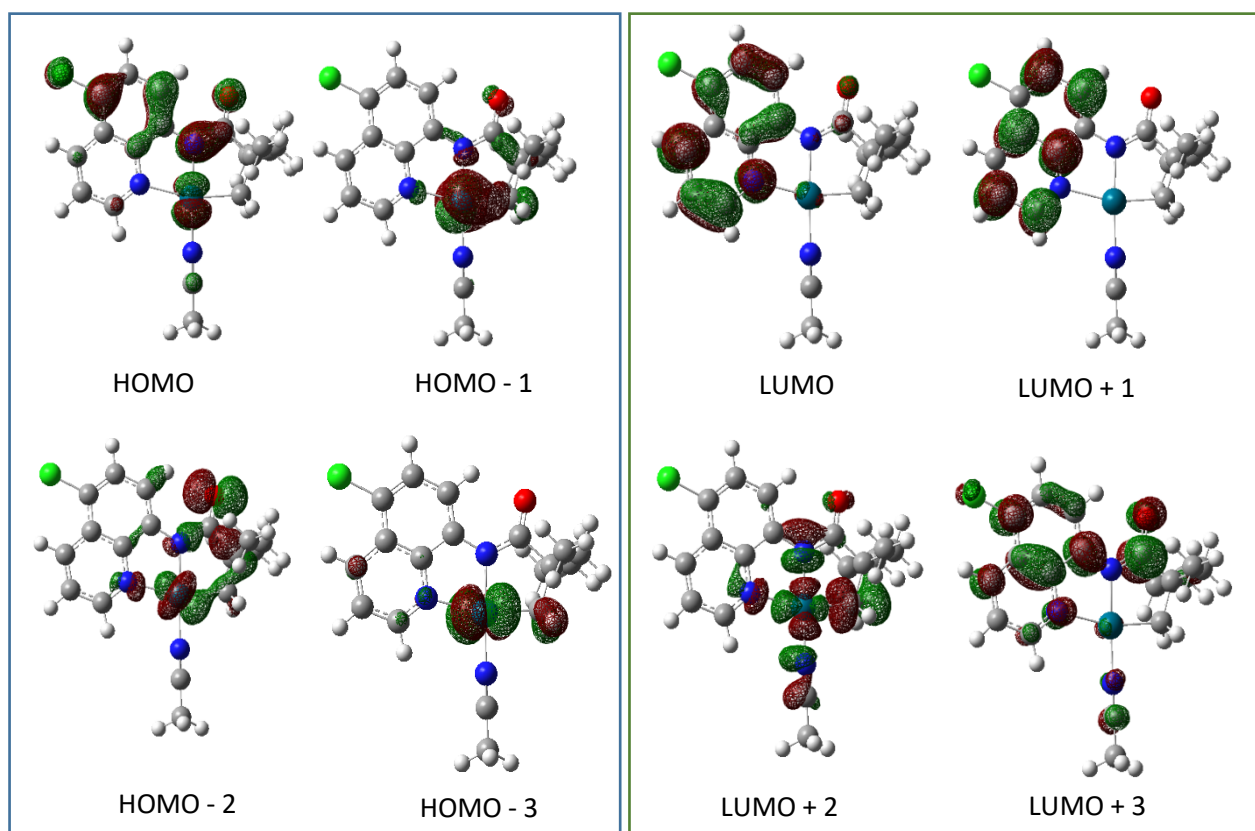

**Figure S21:** Ground state frontier molecular orbitals for the palladacycle **1** (BP86/def2-TZVP).

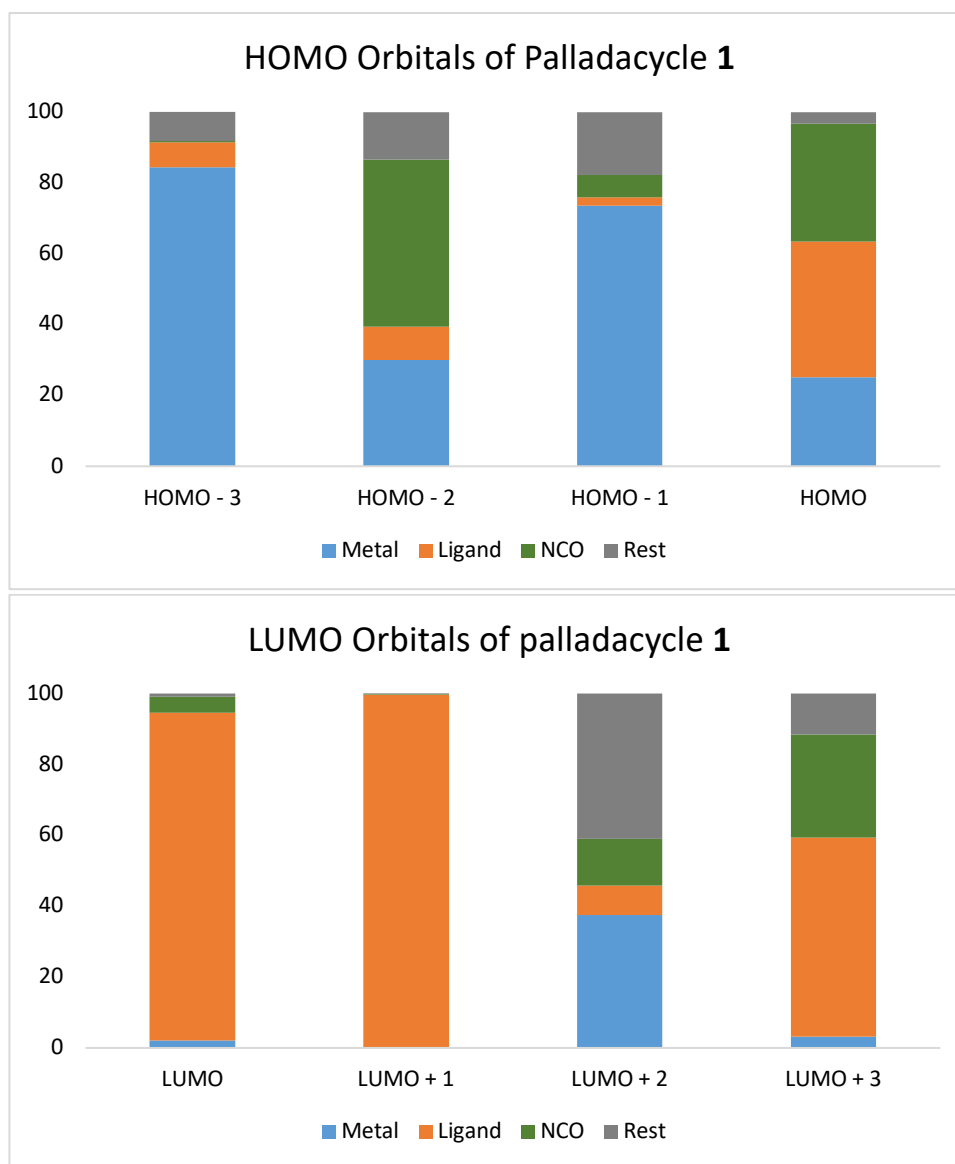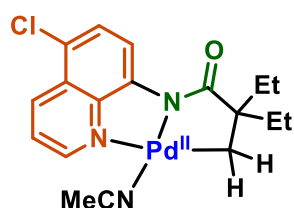

**Figure S22:** Contribution to the respective molecular orbitals of the metal and ligands in palladacycle 1 (BP86/def2-TZVP).

### Thermodynamics of the Reductive Elimination Step

Thermodynamics of the reductive elimination steps in acetonitrile were computed using M06/6-311G(d)/SDD(Pd) and results are summarised in Figure S23, S24 and S25.

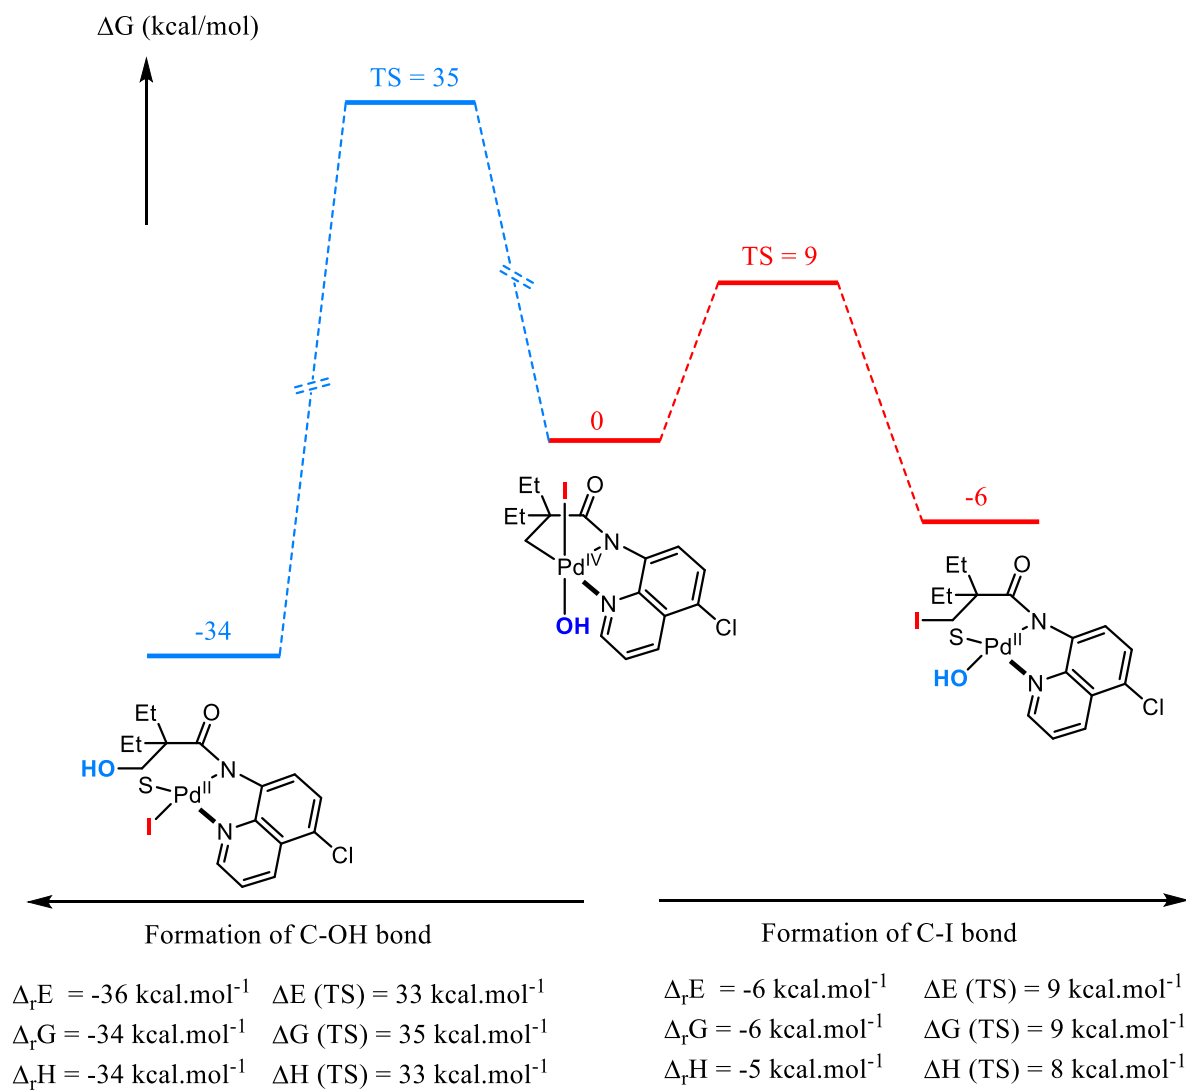

**Figure S23:** DFT computed comparison of thermodynamics (M06/6-311G(d)/SDD(Pd)) of reductive elimination to forge C-I vs C-OH bonds from Pd(IV).

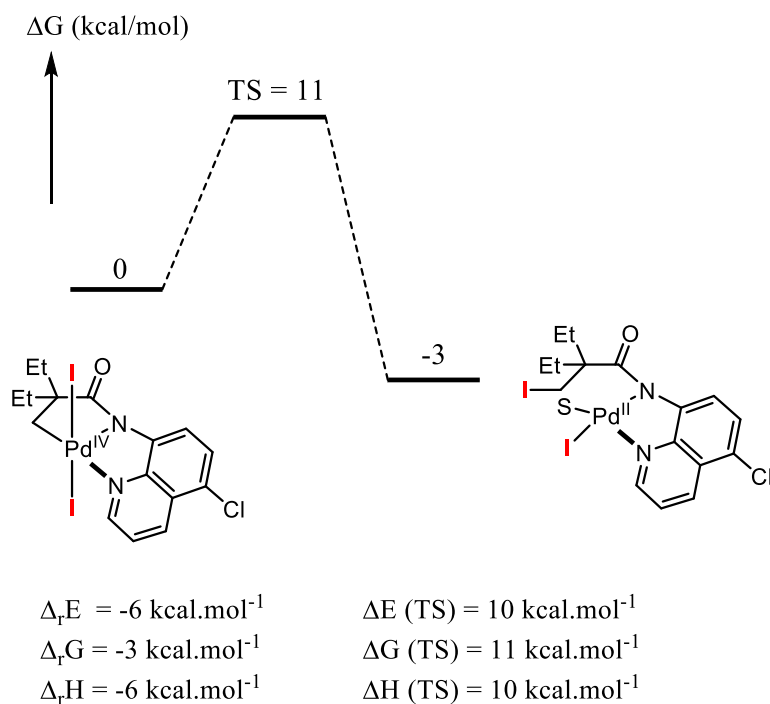

**Figure S24:** DFT computed thermodynamics (M06/6-311G(d)/SDD(Pd)) of reductive elimination to form C-I bond from Pd(IV).

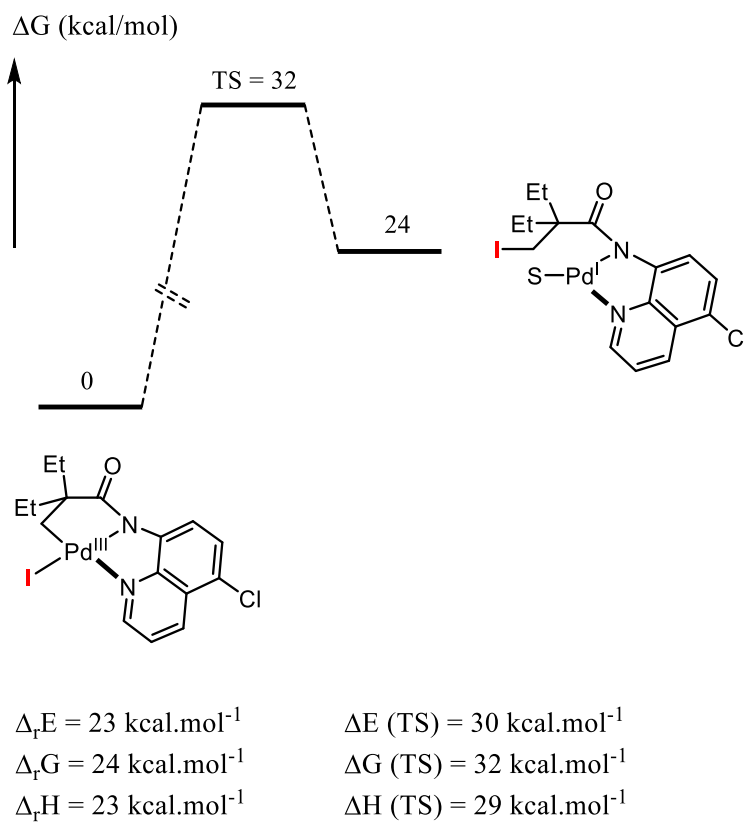

**Figure S25:** DFT computed thermodynamics (M06/6-311G(d)/SDD(Pd)) of reductive elimination of I from Pd(III). This suggests that the reductive elimination to forge C-I bond from Pd(III) complex is endergonic and has a higher TS barrier.

## Cartesian coordinates and energies for all DFT calculated structures using M06/6-311G(d)/SDD(Pd)

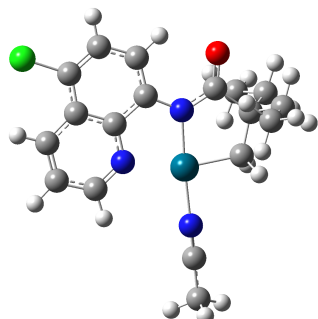

Zero-point correction = 0.345244 (Hartree/Particle)  
Thermal correction to Energy = 0.369736  
Thermal correction to Enthalpy = 0.370680  
Thermal correction to Gibbs Free Energy = 0.289209  
Sum of electronic and zero-point Energies = -1524.793668  
Sum of electronic and thermal Energies = -1524.769176  
Sum of electronic and thermal Enthalpies = -1524.768232  
Sum of electronic and thermal Free Energies = -1524.849703

|   |           |           |           |
|---|-----------|-----------|-----------|
| C | 1.452587  | 2.642133  | 0.004272  |
| H | 0.735059  | 3.460918  | 0.005866  |
| C | 2.831897  | 2.894860  | 0.003656  |
| H | 3.193756  | 3.917885  | 0.004753  |
| C | 3.694526  | 1.834603  | 0.001657  |
| H | 4.768568  | 1.998586  | 0.001074  |
| C | 3.195712  | 0.514390  | 0.000322  |
| C | 4.003443  | -0.645241 | -0.001765 |
| C | 3.436617  | -1.888769 | -0.002899 |
| H | 4.073964  | -2.769199 | -0.004501 |
| C | 2.044136  | -2.053629 | -0.002022 |
| H | 1.625038  | -3.050260 | -0.002968 |
| C | 1.188449  | -0.962557 | -0.000026 |
| C | 1.785908  | 0.342707  | 0.001147  |
| C | -0.957771 | -2.131666 | -0.001564 |
| C | -2.465908 | -1.864963 | -0.000775 |
| C | -2.814105 | -0.367702 | 0.003282  |
| H | -3.393641 | -0.078849 | 0.889451  |
| H | -3.397547 | -0.074990 | -0.879019 |
| C | -3.051893 | -2.555386 | 1.241491  |
| H | -4.141052 | -2.397306 | 1.229264  |
| H | -2.894623 | -3.638174 | 1.139501  |
| C | -2.472112 | -2.090705 | 2.565081  |
| H | -1.400549 | -2.316026 | 2.633327  |



|    |           |           |           |
|----|-----------|-----------|-----------|
| H  | -2.962019 | -2.591365 | 3.407041  |
| H  | -2.588977 | -1.011079 | 2.715370  |
| C  | -3.051924 | -2.548580 | -1.246756 |
| H  | -2.893907 | -3.631830 | -1.151133 |
| H  | -4.141192 | -2.391328 | -1.233149 |
| C  | -2.473104 | -2.075833 | -2.567919 |
| H  | -2.591300 | -0.995529 | -2.712084 |
| H  | -2.962724 | -2.572364 | -3.412503 |
| H  | -1.401290 | -2.299493 | -2.637810 |
| C  | -2.788284 | 3.508720  | -0.001293 |
| C  | -3.530833 | 4.742798  | -0.007170 |
| H  | -3.686382 | 5.092931  | 1.016103  |
| H  | -4.504260 | 4.593023  | -0.480074 |
| H  | -2.983372 | 5.508435  | -0.561972 |
| N  | 0.954584  | 1.425831  | 0.003031  |
| N  | -0.198439 | -0.996284 | 0.000938  |
| N  | -2.196434 | 2.524280  | 0.002553  |
| O  | -0.521901 | -3.276769 | -0.004302 |
| Pd | -1.132752 | 0.770619  | 0.003067  |
| Cl | 5.749779  | -0.496245 | -0.003011 |

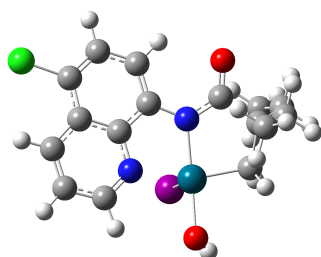

Zero-point correction = 0.312999 (Hartree/Particle)  
 Thermal correction to Energy = 0.336542  
 Thermal correction to Enthalpy = 0.337486  
 Thermal correction to Gibbs Free Energy = 0.259317  
 Sum of electronic and zero-point Energies = -1479.290721  
 Sum of electronic and thermal Energies = -1479.267178  
 Sum of electronic and thermal Enthalpies = -1479.266234  
 Sum of electronic and thermal Free Energies = -1479.344403

|   |           |           |           |
|---|-----------|-----------|-----------|
| C | -1.962254 | -1.931926 | 1.566736  |
| H | -1.374150 | -2.692124 | 2.078512  |
| C | -3.356736 | -2.031057 | 1.459777  |
| H | -3.873685 | -2.877840 | 1.898652  |
| C | -4.037952 | -1.048948 | 0.793481  |
| H | -5.118372 | -1.102427 | 0.692140  |
| C | -3.342372 | 0.039905  | 0.226907  |
| C | -3.947131 | 1.095399  | -0.495325 |
| C | -3.189943 | 2.101604  | -1.028159 |

|    |           |           |           |
|----|-----------|-----------|-----------|
| H  | -3.672503 | 2.898943  | -1.586396 |
| C  | -1.796399 | 2.122983  | -0.870648 |
| H  | -1.223445 | 2.934903  | -1.298179 |
| C  | -1.144359 | 1.130999  | -0.160143 |
| C  | -1.933923 | 0.069365  | 0.384589  |
| C  | 1.130353  | 2.054871  | -0.160319 |
| C  | 2.563627  | 1.692940  | 0.255600  |
| C  | 2.755998  | 0.221547  | 0.600488  |
| H  | 3.149829  | 0.033362  | 1.606481  |
| H  | 3.343348  | -0.339408 | -0.128147 |
| C  | 2.873776  | 2.551045  | 1.503542  |
| H  | 3.919452  | 2.359628  | 1.784282  |
| H  | 2.824270  | 3.603593  | 1.194557  |
| C  | 3.527502  | 2.114470  | -0.863511 |
| H  | 4.551752  | 1.906235  | -0.520917 |
| H  | 3.454030  | 3.204986  | -0.964379 |
| N  | -1.290499 | -0.925665 | 1.055844  |
| N  | 0.222041  | 1.067797  | 0.088298  |
| O  | 0.865465  | 3.165539  | -0.588558 |
| Pd | 0.905015  | -0.646103 | 0.869896  |
| C  | 1.964345  | 2.332012  | 2.695972  |
| H  | 1.976467  | 1.292032  | 3.046037  |
| H  | 0.923524  | 2.592529  | 2.471139  |
| C  | 3.286043  | 1.468515  | -2.214196 |
| H  | 2.276528  | 1.679506  | -2.587652 |
| H  | 3.403844  | 0.379583  | -2.188782 |
| H  | 3.993911  | 1.851512  | -2.956323 |
| H  | 2.280905  | 2.953859  | 3.539352  |
| I  | 1.140535  | -1.872096 | -1.426291 |
| Cl | -5.678475 | 1.113923  | -0.725875 |
| O  | 1.453682  | -2.273442 | 1.866252  |
| H  | 2.201936  | -2.707751 | 1.438409  |

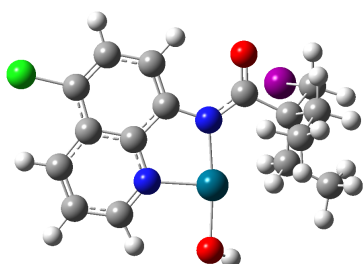

Zero-point correction = 0.313878 (Hartree/Particle)  
 Thermal correction to Energy = 0.337389  
 Thermal correction to Enthalpy = 0.338334  
 Thermal correction to Gibbs Free Energy = 0.259312  
 Sum of electronic and zero-point Energies = -1479.298831  
 Sum of electronic and thermal Energies = -1479.275320

Sum of electronic and thermal Enthalpies = -1479.274375

Sum of electronic and thermal Free Energies = -1479.353397

|    |           |           |           |
|----|-----------|-----------|-----------|
| C  | 2.853876  | 2.160849  | -1.102624 |
| H  | 2.426486  | 3.106495  | -1.431071 |
| C  | 4.199435  | 1.814462  | -1.281353 |
| H  | 4.869234  | 2.513582  | -1.770149 |
| C  | 4.641466  | 0.598441  | -0.835644 |
| H  | 5.681341  | 0.312287  | -0.966408 |
| C  | 3.753173  | -0.296605 | -0.202340 |
| C  | 4.101053  | -1.573425 | 0.295463  |
| C  | 3.161818  | -2.365447 | 0.895779  |
| H  | 3.448837  | -3.343616 | 1.271936  |
| C  | 1.830281  | -1.944251 | 1.039770  |
| H  | 1.113414  | -2.594409 | 1.521760  |
| C  | 1.421707  | -0.706155 | 0.574630  |
| C  | 2.407101  | 0.112017  | -0.050273 |
| C  | -0.923971 | -0.745842 | 1.210474  |
| C  | -2.265255 | 0.032240  | 1.177232  |
| C  | -3.335892 | -0.939859 | 0.711217  |
| H  | -4.338655 | -0.513603 | 0.741645  |
| H  | -3.302527 | -1.855101 | 1.300183  |
| C  | -2.258703 | 1.304662  | 0.317305  |
| H  | -1.552471 | 2.051430  | 0.790277  |
| H  | -1.979823 | 1.037578  | -0.719687 |
| C  | -2.623242 | 0.350347  | 2.648648  |
| H  | -2.635344 | -0.602821 | 3.190304  |
| H  | -3.650576 | 0.735004  | 2.690854  |
| N  | 2.013724  | 1.337544  | -0.514197 |
| N  | 0.146041  | -0.147620 | 0.633025  |
| O  | -0.904034 | -1.836302 | 1.768042  |
| Pd | 0.064729  | 1.699203  | -0.177536 |
| C  | -3.559779 | 2.089525  | 0.221598  |
| H  | -3.923811 | 2.410166  | 1.202399  |
| H  | -4.345863 | 1.502271  | -0.263747 |
| C  | -1.680179 | 1.314345  | 3.345903  |
| H  | -1.717840 | 2.324660  | 2.922233  |
| H  | -0.638783 | 0.973861  | 3.299264  |
| H  | -1.946666 | 1.404409  | 4.403404  |
| H  | -3.407491 | 2.988141  | -0.383557 |
| I  | -3.091854 | -1.641822 | -1.353866 |
| Cl | 5.744693  | -2.146393 | 0.145107  |
| O  | 0.190951  | 3.538313  | -0.958295 |
| H  | -0.619537 | 3.714168  | -1.449399 |

---

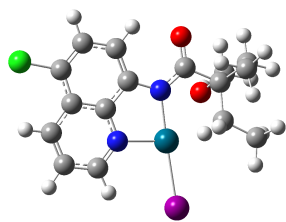

Zero-point correction = 0.316242 (Hartree/Particle)  
 Thermal correction to Energy = 0.339626  
 Thermal correction to Enthalpy = 0.340570  
 Thermal correction to Gibbs Free Energy = 0.261970  
 Sum of electronic and zero-point Energies = -1479.344949  
 Sum of electronic and thermal Energies = -1479.321565  
 Sum of electronic and thermal Enthalpies = -1479.320621  
 Sum of electronic and thermal Free Energies = -1479.399221

|    |           |           |           |
|----|-----------|-----------|-----------|
| C  | -1.542571 | -2.459149 | 0.095032  |
| H  | -0.745127 | -3.195647 | 0.120180  |
| C  | -2.887780 | -2.843510 | 0.111830  |
| H  | -3.135252 | -3.898627 | 0.151903  |
| C  | -3.858552 | -1.882295 | 0.075938  |
| H  | -4.908536 | -2.160153 | 0.086824  |
| C  | -3.502600 | -0.519548 | 0.026039  |
| C  | -4.426351 | 0.550158  | -0.009281 |
| C  | -3.989780 | 1.844435  | -0.052039 |
| H  | -4.713407 | 2.654496  | -0.077482 |
| C  | -2.621568 | 2.152083  | -0.064074 |
| H  | -2.308199 | 3.185566  | -0.100543 |
| C  | -1.665732 | 1.150777  | -0.032508 |
| C  | -2.123380 | -0.194879 | 0.012780  |
| C  | 0.364629  | 2.496811  | -0.157731 |
| C  | 1.907406  | 2.490309  | -0.084253 |
| C  | 2.406533  | 2.927024  | -1.456583 |
| H  | 3.491355  | 3.110226  | -1.414072 |
| H  | 1.918255  | 3.877750  | -1.716215 |
| C  | 2.502197  | 1.127792  | 0.286992  |
| H  | 2.108781  | 0.808116  | 1.266200  |
| H  | 2.267918  | 0.416603  | -0.574506 |
| C  | 2.320473  | 3.567883  | 0.929210  |
| H  | 1.876475  | 4.512259  | 0.593020  |
| H  | 3.407997  | 3.708985  | 0.878772  |
| N  | -1.178929 | -1.191869 | 0.046507  |
| N  | -0.281325 | 1.303660  | -0.019655 |
| O  | -0.208922 | 3.562543  | -0.333419 |
| Pd | 0.715620  | -0.443837 | 0.013336  |
| C  | 4.018693  | 1.021315  | 0.358448  |
| H  | 4.424706  | 1.683447  | 1.129599  |

|    |           |           |           |
|----|-----------|-----------|-----------|
| H  | 4.492371  | 1.270611  | -0.595606 |
| C  | 1.897376  | 3.289483  | 2.359657  |
| H  | 2.406992  | 2.418367  | 2.787396  |
| H  | 0.817390  | 3.111701  | 2.436585  |
| H  | 2.131018  | 4.142263  | 3.004415  |
| H  | 4.308736  | -0.001701 | 0.615677  |
| I  | 2.142565  | -2.718208 | 0.022993  |
| Cl | -6.141183 | 0.219890  | 0.001942  |
| O  | 2.095745  | 1.915837  | -2.389607 |
| H  | 2.417386  | 2.177445  | -3.257759 |

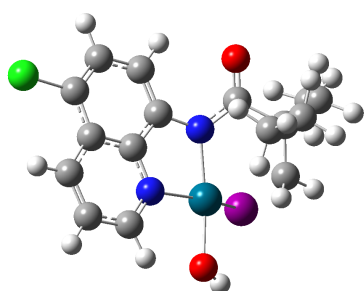

Zero-point correction = 0.312884 (Hartree/Particle)  
 Thermal correction to Energy = 0.335957  
 Thermal correction to Enthalpy = 0.336902  
 Thermal correction to Gibbs Free Energy = 0.260081  
 Sum of electronic and zero-point Energies = -1479.276896  
 Sum of electronic and thermal Energies = -1479.253823  
 Sum of electronic and thermal Enthalpies = -1479.252879  
 Sum of electronic and thermal Free Energies = -1479.329699

|   |           |           |           |
|---|-----------|-----------|-----------|
| C | -2.033013 | -2.274137 | 1.159502  |
| H | -1.373365 | -3.023464 | 1.594593  |
| C | -3.427490 | -2.411493 | 1.121296  |
| H | -3.890588 | -3.287486 | 1.562963  |
| C | -4.178318 | -1.438942 | 0.517374  |
| H | -5.259857 | -1.531605 | 0.470667  |
| C | -3.554773 | -0.309182 | -0.053829 |
| C | -4.221782 | 0.752547  | -0.708902 |
| C | -3.519270 | 1.803609  | -1.228860 |
| H | -4.051144 | 2.603713  | -1.736209 |
| C | -2.119306 | 1.871853  | -1.123142 |
| H | -1.595094 | 2.722329  | -1.538092 |
| C | -1.409020 | 0.870298  | -0.490886 |
| C | -2.144788 | -0.230452 | 0.032286  |
| C | 0.670545  | 1.970842  | -0.032592 |
| C | 1.939599  | 1.813402  | 0.820509  |
| C | 2.434324  | 0.423839  | 1.077796  |
| H | 2.025684  | -0.122440 | 1.931873  |
| H | 3.513206  | 0.304436  | 1.054964  |

|    |           |           |           |
|----|-----------|-----------|-----------|
| C  | 1.519730  | 2.341157  | 2.237207  |
| H  | 2.369453  | 2.190409  | 2.917611  |
| H  | 1.412061  | 3.427209  | 2.121859  |
| C  | 3.043063  | 2.750105  | 0.313146  |
| H  | 3.845356  | 2.768132  | 1.065026  |
| H  | 2.608433  | 3.755977  | 0.308732  |
| N  | -1.436104 | -1.225542 | 0.639745  |
| N  | -0.033920 | 0.831232  | -0.246897 |
| O  | 0.313385  | 3.094049  | -0.351650 |
| Pd | 0.606130  | -1.005311 | 0.357613  |
| C  | 0.250533  | 1.773611  | 2.841286  |
| H  | 0.280511  | 0.686513  | 2.974415  |
| H  | -0.632145 | 2.008862  | 2.235057  |
| C  | 3.625311  | 2.463588  | -1.057071 |
| H  | 2.844419  | 2.366150  | -1.821243 |
| H  | 4.224160  | 1.548691  | -1.078499 |
| H  | 4.280519  | 3.285766  | -1.363196 |
| H  | 0.089084  | 2.211268  | 3.831542  |
| I  | 2.814294  | -1.127502 | -1.113972 |
| Cl | -5.961174 | 0.716394  | -0.868069 |
| O  | 0.897532  | -2.827196 | 1.122994  |
| H  | 1.773170  | -3.159351 | 0.894565  |

Imaginary Vibrational Frequency = -160.3659 cm-1

---

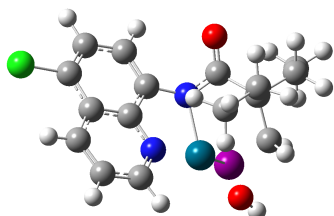

Zero-point correction = 0.313415 (Hartree/Particle)  
 Thermal correction to Energy = 0.336079  
 Thermal correction to Enthalpy = 0.337023  
 Thermal correction to Gibbs Free Energy = 0.261240  
 Sum of electronic and zero-point Energies = -1479.236999  
 Sum of electronic and thermal Energies = -1479.214335  
 Sum of electronic and thermal Enthalpies = -1479.213391  
 Sum of electronic and thermal Free Energies = -1479.289174

|   |           |           |          |
|---|-----------|-----------|----------|
| C | -1.361948 | -1.341896 | 1.926252 |
| H | -0.648971 | -1.984870 | 2.438020 |
| C | -2.688147 | -1.216369 | 2.367553 |
| H | -3.012587 | -1.772446 | 3.240476 |
| C | -3.550542 | -0.403216 | 1.681819 |
| H | -4.584280 | -0.304249 | 2.001220 |
| C | -3.097156 | 0.314409  | 0.555227 |

|    |           |           |           |
|----|-----------|-----------|-----------|
| C  | -3.873940 | 1.197539  | -0.236181 |
| C  | -3.326599 | 1.868801  | -1.294842 |
| H  | -3.948017 | 2.537520  | -1.883502 |
| C  | -1.966825 | 1.710176  | -1.628247 |
| H  | -1.542230 | 2.271203  | -2.454657 |
| C  | -1.174526 | 0.859610  | -0.902942 |
| C  | -1.746065 | 0.146250  | 0.181463  |
| C  | 1.009709  | 1.691651  | -0.581547 |
| C  | 2.267147  | 1.384245  | 0.296384  |
| C  | 2.840689  | -0.009636 | 0.576034  |
| H  | 3.270613  | -0.075497 | 1.570431  |
| H  | 3.485346  | -0.428834 | -0.189704 |
| C  | 2.011382  | 2.078679  | 1.650518  |
| H  | 2.960667  | 2.065085  | 2.204670  |
| H  | 1.792172  | 3.131511  | 1.445082  |
| C  | 3.488385  | 2.091540  | -0.360268 |
| H  | 4.383767  | 1.883516  | 0.243692  |
| H  | 3.298084  | 3.166190  | -0.245818 |
| N  | -0.917288 | -0.693295 | 0.872811  |
| N  | 0.214800  | 0.669594  | -1.057933 |
| O  | 0.729410  | 2.863221  | -0.743655 |
| Pd | 0.835888  | -1.051039 | -0.251506 |
| C  | 0.910406  | 1.480490  | 2.500491  |
| H  | 1.074459  | 0.414751  | 2.702255  |
| H  | -0.073017 | 1.582565  | 2.025830  |
| C  | 3.739791  | 1.763097  | -1.817454 |
| H  | 2.874989  | 2.016901  | -2.441626 |
| H  | 3.964148  | 0.704863  | -1.985812 |
| H  | 4.592236  | 2.338934  | -2.190806 |
| H  | 0.856191  | 1.990689  | 3.467137  |
| I  | 2.196560  | -1.931811 | -2.386694 |
| Cl | -5.561772 | 1.426336  | 0.141992  |
| O  | 2.137214  | -1.872636 | 1.138584  |
| H  | 2.816318  | -2.401855 | 0.695171  |

Imaginary Vibrational Frequency = -356.8993 cm-1

---

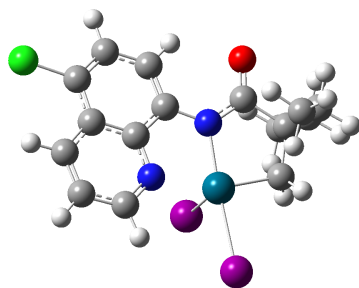

Zero-point correction = 0.300075 (Hartree/Particle)  
 Thermal correction to Energy = 0.324008

Thermal correction to Enthalpy = 0.324952  
 Thermal correction to Gibbs Free Energy = 0.243771  
 Sum of electronic and zero-point Energies = -1414.939969  
 Sum of electronic and thermal Energies = -1414.916035  
 Sum of electronic and thermal Enthalpies = -1414.915091  
 Sum of electronic and thermal Free Energies = -1414.996273

|    |           |           |           |
|----|-----------|-----------|-----------|
| C  | 1.466880  | -2.505587 | -0.702041 |
| H  | 0.616519  | -3.170469 | -0.848657 |
| C  | 2.774640  | -3.004591 | -0.655249 |
| H  | 2.950698  | -4.068451 | -0.772980 |
| C  | 3.807001  | -2.130232 | -0.450475 |
| H  | 4.830716  | -2.490110 | -0.399781 |
| C  | 3.547484  | -0.753388 | -0.295997 |
| C  | 4.540037  | 0.226916  | -0.055507 |
| C  | 4.200028  | 1.541309  | 0.112552  |
| H  | 4.975249  | 2.276894  | 0.306875  |
| C  | 2.864638  | 1.957595  | 0.036826  |
| H  | 2.624438  | 3.005031  | 0.161082  |
| C  | 1.849044  | 1.053395  | -0.229021 |
| C  | 2.198025  | -0.326724 | -0.373194 |
| C  | -0.032965 | 2.623410  | -0.440893 |
| C  | -1.554859 | 2.639920  | -0.604467 |
| C  | -2.223511 | 1.291700  | -0.367597 |
| H  | -2.848479 | 0.949361  | -1.199464 |
| H  | -2.794390 | 1.225747  | 0.560354  |
| C  | -1.818605 | 3.084597  | -2.062706 |
| H  | -2.908041 | 3.158712  | -2.189923 |
| H  | -1.425352 | 4.104425  | -2.168412 |
| C  | -2.145678 | 3.705417  | 0.331288  |
| H  | -3.229560 | 3.747339  | 0.149572  |
| H  | -1.744130 | 4.676699  | 0.014426  |
| N  | 1.192930  | -1.225084 | -0.570715 |
| N  | 0.507021  | 1.363304  | -0.385866 |
| O  | 0.615222  | 3.653316  | -0.467578 |
| Pd | -0.775047 | -0.184462 | -0.392568 |
| C  | -1.224401 | 2.203253  | -3.143516 |
| H  | -1.568408 | 1.162457  | -3.080243 |
| H  | -0.129027 | 2.189551  | -3.104890 |
| C  | -1.869928 | 3.506729  | 1.809311  |
| H  | -0.793882 | 3.484847  | 2.020643  |
| H  | -2.297947 | 2.576225  | 2.197930  |
| H  | -2.298827 | 4.326969  | 2.393833  |
| H  | -1.509712 | 2.570533  | -4.134431 |
| Cl | 6.217026  | -0.239068 | 0.043787  |
| I  | -2.474090 | -2.219260 | -0.713868 |
| I  | -0.876392 | -0.385509 | 2.230634  |



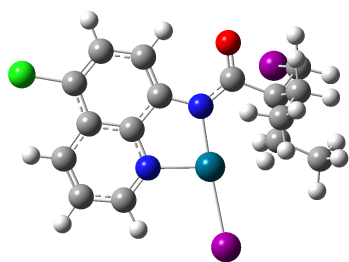

Zero-point correction = 0.301042 (Hartree/Particle)  
 Thermal correction to Energy = 0.324797  
 Thermal correction to Enthalpy = 0.325741  
 Thermal correction to Gibbs Free Energy = 0.243586  
 Sum of electronic and zero-point Energies = -1414.949152  
 Sum of electronic and thermal Energies = -1414.925397  
 Sum of electronic and thermal Enthalpies = -1414.924453  
 Sum of electronic and thermal Free Energies = -1415.006608

|    |           |           |           |
|----|-----------|-----------|-----------|
| C  | 2.893853  | 1.747867  | -0.677969 |
| H  | 2.498158  | 2.742757  | -0.857796 |
| C  | 4.239453  | 1.447778  | -0.914925 |
| H  | 4.896531  | 2.226185  | -1.286821 |
| C  | 4.695622  | 0.182608  | -0.671738 |
| H  | 5.737255  | -0.069886 | -0.847601 |
| C  | 3.814251  | -0.806658 | -0.191851 |
| C  | 4.182930  | -2.143179 | 0.086187  |
| C  | 3.258207  | -3.039004 | 0.543603  |
| H  | 3.558665  | -4.062004 | 0.752070  |
| C  | 1.922078  | -2.665492 | 0.750076  |
| H  | 1.214225  | -3.396898 | 1.113207  |
| C  | 1.497642  | -1.372654 | 0.497164  |
| C  | 2.462432  | -0.441965 | 0.024555  |
| C  | -0.846386 | -1.566444 | 1.131408  |
| C  | -2.209730 | -0.841205 | 1.209816  |
| C  | -3.257538 | -1.787957 | 0.648487  |
| H  | -4.272001 | -1.402369 | 0.749256  |
| H  | -3.182448 | -2.764493 | 1.124548  |
| C  | -2.250053 | 0.513742  | 0.497259  |
| H  | -1.570640 | 1.231372  | 1.061889  |
| H  | -1.967820 | 0.380106  | -0.560564 |
| C  | -2.551071 | -0.704267 | 2.713438  |
| H  | -2.518676 | -1.712405 | 3.143376  |
| H  | -3.591348 | -0.368317 | 2.811598  |
| N  | 2.045935  | 0.842851  | -0.226997 |
| N  | 0.207740  | -0.863027 | 0.638382  |
| O  | -0.777418 | -2.719736 | 1.532044  |
| Pd | 0.064728  | 1.090250  | 0.165532  |
| C  | -3.568359 | 1.274467  | 0.511625  |

|    |           |           |           |
|----|-----------|-----------|-----------|
| H  | -3.925687 | 1.467094  | 1.527525  |
| H  | -4.344398 | 0.725299  | -0.031030 |
| C  | -1.634674 | 0.211104  | 3.505522  |
| H  | -1.713160 | 1.260973  | 3.198710  |
| H  | -0.582033 | -0.082789 | 3.415736  |
| H  | -1.893513 | 0.173365  | 4.567968  |
| H  | -3.444441 | 2.240419  | 0.013519  |
| I  | -0.218736 | 3.705967  | -0.359759 |
| I  | -3.035768 | -2.228586 | -1.488568 |
| Cl | 5.833189  | -2.658494 | -0.156512 |

---

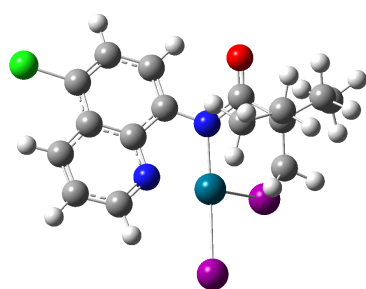

Zero-point correction = 0.299910 (Hartree/Particle)  
 Thermal correction to Energy = 0.323253  
 Thermal correction to Enthalpy = 0.324197  
 Thermal correction to Gibbs Free Energy = 0.245111  
 Sum of electronic and zero-point Energies = -1414.923986  
 Sum of electronic and thermal Energies = -1414.900643  
 Sum of electronic and thermal Enthalpies = -1414.899699  
 Sum of electronic and thermal Free Energies = -1414.978785

|   |           |           |           |
|---|-----------|-----------|-----------|
| C | 1.758917  | -2.450278 | -0.526742 |
| H | 0.967464  | -3.164505 | -0.740345 |
| C | 3.102991  | -2.844713 | -0.515228 |
| H | 3.354724  | -3.876559 | -0.735552 |
| C | 4.067913  | -1.924039 | -0.214486 |
| H | 5.114887  | -2.212032 | -0.186900 |
| C | 3.706839  | -0.588817 | 0.056548  |
| C | 4.617376  | 0.448014  | 0.372860  |
| C | 4.177278  | 1.720548  | 0.607606  |
| H | 4.892388  | 2.499170  | 0.857229  |
| C | 2.812390  | 2.039758  | 0.527690  |
| H | 2.491440  | 3.058718  | 0.700046  |
| C | 1.879154  | 1.071970  | 0.218729  |
| C | 2.330776  | -0.257911 | 0.006937  |
| C | 0.027488  | 2.399208  | -0.546590 |
| C | -1.371078 | 2.287064  | -1.169578 |
| C | -2.173712 | 1.070874  | -0.830851 |
| H | -2.082217 | 0.190904  | -1.473165 |
| H | -3.220763 | 1.241903  | -0.599586 |

|    |           |           |           |
|----|-----------|-----------|-----------|
| C  | -1.108402 | 2.180514  | -2.711386 |
| H  | -2.081059 | 2.059440  | -3.208200 |
| H  | -0.736017 | 3.169162  | -3.008641 |
| C  | -2.155966 | 3.587529  | -0.947148 |
| H  | -3.064023 | 3.542082  | -1.565782 |
| H  | -1.542242 | 4.390768  | -1.370224 |
| N  | 1.387366  | -1.213554 | -0.266616 |
| N  | 0.509449  | 1.271142  | 0.037466  |
| O  | 0.665182  | 3.427312  | -0.701167 |
| Pd | -0.555417 | -0.455692 | 0.118777  |
| C  | -0.135958 | 1.119288  | -3.186265 |
| H  | -0.459724 | 0.096495  | -2.961428 |
| H  | 0.863455  | 1.253691  | -2.755407 |
| C  | -2.519957 | 3.951302  | 0.478623  |
| H  | -1.642129 | 3.960586  | 1.135717  |
| H  | -3.254731 | 3.269606  | 0.916333  |
| H  | -2.956972 | 4.954858  | 0.505012  |
| H  | -0.030615 | 1.183596  | -4.273823 |
| Cl | 6.324677  | 0.098670  | 0.476599  |
| I  | -1.866348 | -2.798662 | -0.051082 |
| I  | -2.318444 | 0.521965  | 1.841827  |

Imaginary Vibrational Frequency = -160.4599 cm-1

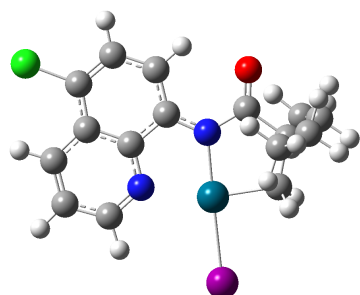

Zero-point correction = 0.298506 (Hartree/Particle)

Thermal correction to Energy = 0.320584

Thermal correction to Enthalpy = 0.321529

Thermal correction to Gibbs Free Energy = 0.242193

Sum of electronic and zero-point Energies = -1403.533063

Sum of electronic and thermal Energies = -1403.510984

Sum of electronic and thermal Enthalpies = -1403.510040

Sum of electronic and thermal Free Energies = -1403.589376

|   |          |           |          |
|---|----------|-----------|----------|
| C | 1.319736 | -2.606882 | 0.022530 |
| H | 0.473326 | -3.292302 | 0.027229 |
| C | 2.635387 | -3.080966 | 0.021343 |
| H | 2.825315 | -4.148852 | 0.025699 |
| C | 3.663314 | -2.175907 | 0.013847 |
| H | 4.695390 | -2.513708 | 0.012056 |

|    |           |           |           |
|----|-----------|-----------|-----------|
| C  | 3.379322  | -0.797215 | 0.008101  |
| C  | 4.369604  | 0.222611  | -0.001805 |
| C  | 4.019498  | 1.555365  | -0.008476 |
| H  | 4.798527  | 2.311570  | -0.016888 |
| C  | 2.687290  | 1.945841  | -0.004285 |
| H  | 2.438293  | 2.997896  | -0.008671 |
| C  | 1.652746  | 0.996025  | 0.006825  |
| C  | 2.022730  | -0.403002 | 0.011194  |
| C  | -0.262697 | 2.541920  | 0.009772  |
| C  | -1.785701 | 2.526966  | -0.015781 |
| C  | -2.398834 | 1.119000  | 0.010855  |
| H  | -3.034149 | 0.927380  | -0.860633 |
| H  | -3.000711 | 0.944094  | 0.909157  |
| C  | -2.211234 | 3.271261  | -1.295452 |
| H  | -3.309945 | 3.311485  | -1.299270 |
| H  | -1.862916 | 4.310527  | -1.221458 |
| C  | -2.262980 | 3.339854  | 1.201652  |
| H  | -3.361586 | 3.365497  | 1.166573  |
| H  | -1.924283 | 4.377584  | 1.078512  |
| N  | 1.026388  | -1.320776 | 0.017519  |
| N  | 0.320109  | 1.253725  | 0.012135  |
| O  | 0.376549  | 3.567366  | 0.022358  |
| Pd | -0.940538 | -0.294730 | 0.011181  |
| C  | -1.703453 | 2.657954  | -2.587607 |
| H  | -2.017063 | 1.614369  | -2.705083 |
| H  | -0.607513 | 2.678364  | -2.643235 |
| C  | -1.791921 | 2.810057  | 2.543849  |
| H  | -0.699382 | 2.854259  | 2.635950  |
| H  | -2.092288 | 1.769322  | 2.710802  |
| H  | -2.206450 | 3.403082  | 3.365232  |
| H  | -2.078251 | 3.210175  | -3.455207 |
| I  | -2.659826 | -2.316337 | -0.002346 |
| Cl | 6.044970  | -0.200246 | -0.006859 |

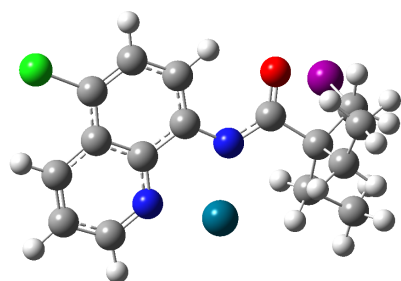

Zero-point correction = 0.299063 (Hartree/Particle)  
 Thermal correction to Energy = 0.321117  
 Thermal correction to Enthalpy = 0.322061  
 Thermal correction to Gibbs Free Energy = 0.244135  
 Sum of electronic and zero-point Energies = -1403.495709  
 Sum of electronic and thermal Energies = -1403.473654

Sum of electronic and thermal Enthalpies = -1403.472710  
Sum of electronic and thermal Free Energies = -1403.550636

|    |           |           |           |
|----|-----------|-----------|-----------|
| C  | 3.393563  | 2.289486  | -0.804572 |
| H  | 3.141086  | 3.323981  | -1.027770 |
| C  | 4.705773  | 1.821891  | -0.945657 |
| H  | 5.487589  | 2.495445  | -1.280954 |
| C  | 4.966132  | 0.512801  | -0.653708 |
| H  | 5.972883  | 0.116963  | -0.753320 |
| C  | 3.929515  | -0.340197 | -0.219293 |
| C  | 4.116888  | -1.703133 | 0.099623  |
| C  | 3.064529  | -2.467281 | 0.514228  |
| H  | 3.222522  | -3.515425 | 0.755388  |
| C  | 1.778026  | -1.926314 | 0.635094  |
| H  | 0.970303  | -2.563686 | 0.963522  |
| C  | 1.504404  | -0.594413 | 0.344200  |
| C  | 2.620594  | 0.206104  | -0.096415 |
| C  | -0.856156 | -0.599414 | 0.821101  |
| C  | -2.122742 | 0.280768  | 1.022776  |
| C  | -3.344235 | -0.594796 | 0.827033  |
| H  | -4.276222 | -0.088687 | 1.081644  |
| H  | -3.259595 | -1.530373 | 1.371771  |
| C  | -2.202272 | 1.546995  | 0.149044  |
| H  | -1.505188 | 2.308158  | 0.581345  |
| H  | -1.893018 | 1.310699  | -0.879595 |
| C  | -2.104212 | 0.736932  | 2.509888  |
| H  | -2.948955 | 1.421867  | 2.665914  |
| H  | -1.197483 | 1.345132  | 2.640834  |
| N  | 2.406804  | 1.518367  | -0.400891 |
| N  | 0.275101  | 0.037904  | 0.446753  |
| O  | -0.956687 | -1.798171 | 1.084117  |
| Pd | 0.364803  | 2.089441  | -0.165276 |
| C  | -3.548939 | 2.255464  | 0.093549  |
| H  | -3.933262 | 2.504641  | 1.088215  |
| H  | -4.307054 | 1.657884  | -0.422513 |
| C  | -2.143364 | -0.342968 | 3.575217  |
| H  | -1.322689 | -1.058177 | 3.468145  |
| H  | -3.080623 | -0.910101 | 3.557148  |
| H  | -2.063632 | 0.112066  | 4.567971  |
| H  | -3.450724 | 3.195002  | -0.458756 |
| I  | -3.641738 | -1.281716 | -1.243652 |
| Cl | 5.706490  | -2.429930 | -0.037022 |

---

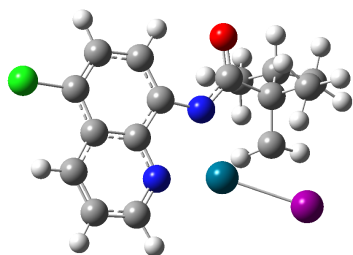

Zero-point correction = 0.298468 (Hartree/Particle)  
 Thermal correction to Energy = 0.320118  
 Thermal correction to Enthalpy = 0.321063  
 Thermal correction to Gibbs Free Energy = 0.245372  
 Sum of electronic and zero-point Energies = -1403.486050  
 Sum of electronic and thermal Energies = -1403.464400  
 Sum of electronic and thermal Enthalpies = -1403.463455  
 Sum of electronic and thermal Free Energies = -1403.539146

|    |           |           |           |
|----|-----------|-----------|-----------|
| C  | -1.895259 | -2.694530 | -0.447713 |
| H  | -1.161441 | -3.492723 | -0.537747 |
| C  | -3.268177 | -2.962449 | -0.530032 |
| H  | -3.610096 | -3.980256 | -0.686439 |
| C  | -4.149037 | -1.924317 | -0.407433 |
| H  | -5.219705 | -2.100664 | -0.463912 |
| C  | -3.673781 | -0.611543 | -0.205595 |
| C  | -4.502265 | 0.525420  | -0.069003 |
| C  | -3.958215 | 1.763547  | 0.125085  |
| H  | -4.611603 | 2.626017  | 0.227805  |
| C  | -2.569534 | 1.945704  | 0.195629  |
| H  | -2.169293 | 2.937906  | 0.352490  |
| C  | -1.692234 | 0.878187  | 0.068451  |
| C  | -2.268314 | -0.419685 | -0.133307 |
| C  | 0.402163  | 2.048152  | 0.326072  |
| C  | 1.932400  | 1.903778  | 0.240936  |
| C  | 2.455436  | 0.703058  | -0.496471 |
| H  | 3.524176  | 0.779930  | -0.680420 |
| H  | 1.951671  | 0.429195  | -1.426235 |
| C  | 2.531868  | 2.070616  | 1.654447  |
| H  | 3.578519  | 1.736118  | 1.619605  |
| H  | 2.569292  | 3.146394  | 1.867922  |
| C  | 2.459938  | 3.094368  | -0.614166 |
| H  | 3.555150  | 3.120809  | -0.530149 |
| H  | 2.082043  | 3.993349  | -0.114936 |
| N  | -1.422702 | -1.481015 | -0.257669 |
| N  | -0.309978 | 0.928576  | 0.089238  |
| O  | -0.051131 | 3.153103  | 0.619193  |
| Pd | 0.648416  | -0.965141 | -0.032850 |
| C  | 1.788226  | 1.385844  | 2.787194  |

|    |           |           |           |
|----|-----------|-----------|-----------|
| H  | 1.656962  | 0.311423  | 2.625995  |
| H  | 0.793100  | 1.823142  | 2.926857  |
| C  | 2.032609  | 3.107864  | -2.070693 |
| H  | 0.946407  | 2.990114  | -2.170402 |
| H  | 2.508912  | 2.319046  | -2.662873 |
| H  | 2.298810  | 4.061690  | -2.536864 |
| H  | 2.334081  | 1.511557  | 3.728266  |
| I  | 3.193698  | -1.440854 | 0.694846  |
| Cl | -6.243827 | 0.353921  | -0.145160 |

Imaginary Vibrational Frequency = -172.5706 cm-1

-----

## Optimisation and Control Experiments

### Importance of Light, Oxidant and Halogenation Source

**Table S4:** Summary of Control Experiments

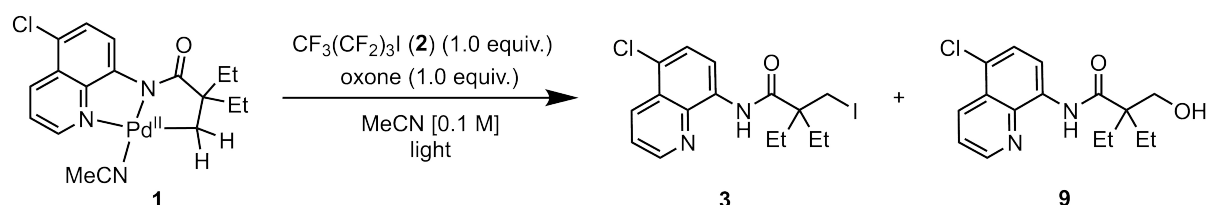

| Deviations from standard conditions | Conversion of <b>1</b> | Yield <b>3</b> [%] | Yield <b>9</b> [%] |
|-------------------------------------|------------------------|--------------------|--------------------|
| None                                | > 99                   | 99                 | trace              |
| No light                            | 10                     | N.D.               | 5                  |
| No iodination reagent               | 20                     | N.D.               | 15                 |
| No oxone                            | > 99                   | 55                 | N.D.               |
| No oxone, no light                  | N.R.                   | N.D.               | N.D.               |

### Solvent Effect

**Table S5:** Solvent screen

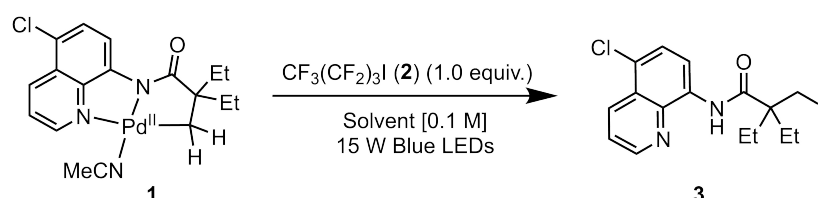

| Solvent         | Yield <b>3</b> [%] | Unreacted palladacycle <b>1</b> [%] |
|-----------------|--------------------|-------------------------------------|
| MeCN            | 55 (54 isolated)   | ND                                  |
| $\text{CHCl}_3$ | 50                 | ND                                  |
| Acetone         | 37                 | 21                                  |
| 1,2-DCE         | 38                 | ND                                  |
| Chlorobenzene   | 41                 | ND                                  |
| EtOAc           | 37                 | ND                                  |
| DMF             | 34                 | ND                                  |
| MeOH            | 43                 | ND                                  |



## Homolysis of Perfluorobutyl Iodide 2 Under Blue Light Irradiation

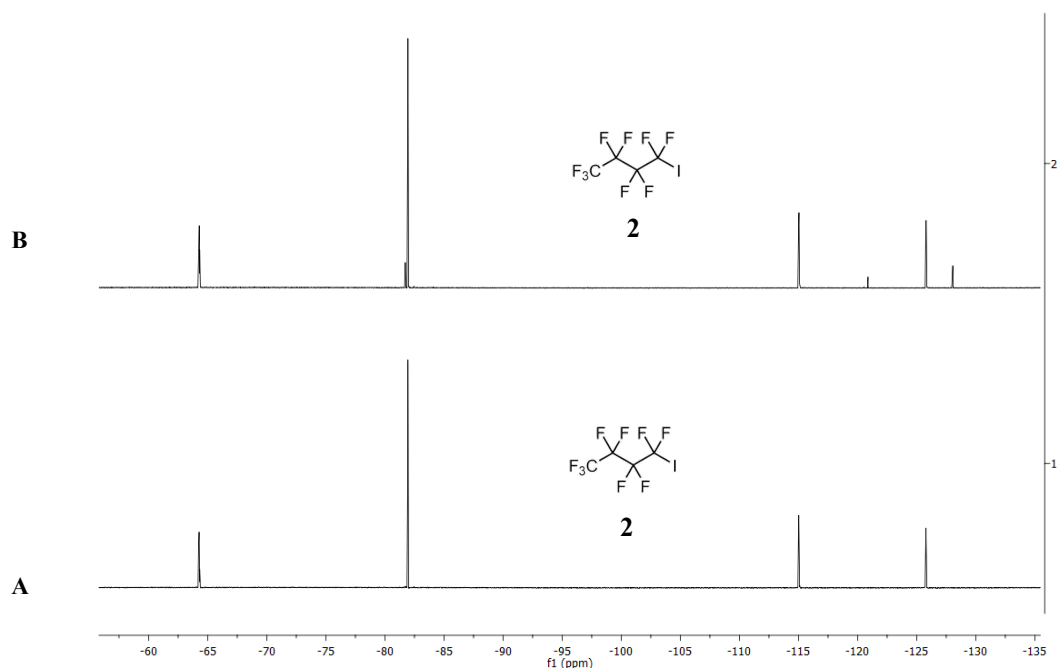

**Figure S26:**  $^{19}\text{F}$  NMR (CD<sub>3</sub>CN, 376 MHz) spectrum of (A) Perfluorobutyl iodide in CD<sub>3</sub>CN (B) Perfluorobutyl iodide in CD<sub>3</sub>CN after irradiation with 15 W blue LEDs for 24 hours, in a standard NMR tube.

## Stability of Palladacycle in the Presence of Iodinated Product 3 Under Blue Light Irradiation

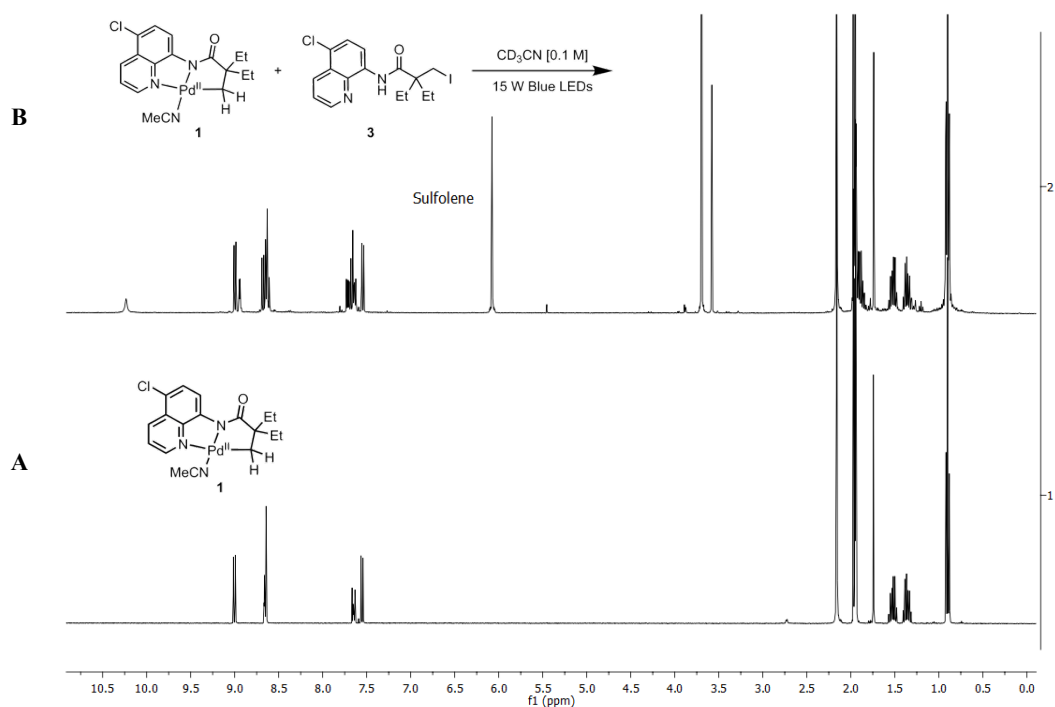

**Figure S27:**  $^1\text{H}$  NMR (CD<sub>3</sub>CN, 400 MHz) spectrum of (A) Palladacycle **1** in CD<sub>3</sub>CN (B) A reaction mixture containing palladacycle **1** and product **3** in CD<sub>3</sub>CN, and sulfolene as an internal standard, after irradiation with 15 W blue LEDs for 24 hours; no decomposition of either **1** or **3** is evident;

## Synthesis and Characterization

### 5-Chloro-8-aminoquinoline

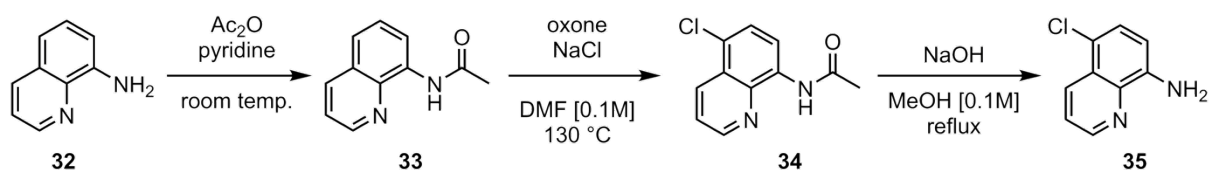

Pyridine (3 drops) was added to a solution of 8-aminoquinoline **32** (3.0 g, 20.8 mmol) in acetic anhydride (26 mL). The reaction mixture was stirred at room temperature for 12 hours. It was then quenched with saturated aqueous NaHCO<sub>3</sub> solution, and the mixture was left to stir for 1 hour. It was extracted with CH<sub>2</sub>Cl<sub>2</sub> (3×), and the combined organic extracts were washed with brine (3×) and dried (MgSO<sub>4</sub>). The solvent was removed under reduced pressure to give *N*-(quinolin-8-yl)acetamide **33** as a yellow solid, which was used without further purification.

Oxone (8.0 g, 26 mmol, 1.5 equiv.) and NaCl (4.1 g, 70 mmol, 4.0 equiv.) were added to a solution of *N*-(quinolin-8-yl)acetamide (3.2 g, 17.5 mmol) in DMF (170 mL). The reaction flask was sealed and heated at 130 °C for 12 hours. After cooling to room temperature, the reaction mixture was diluted with water and extracted with EtOAc (3×). The combined organic extracts were washed with saturated aqueous LiCl solution (3×) and dried (MgSO<sub>4</sub>). The solvent was removed under reduced pressure to yield **34** a pale brown solid, which was used without further purification.

*N*-(5-Chloroquinolin-8-yl)acetamide **34** (2.7 g, 12.2 mmol) was added to a solution of NaOH (4.8 g, 122 mmol, 10 equiv.) in MeOH (120 mL) and the reaction mixture was heated at reflux for 12 hours. The reaction mixture was cooled to room temperature, extracted with CH<sub>2</sub>Cl<sub>2</sub> (3×) and dried (MgSO<sub>4</sub>). The solvent was removed under reduced pressure to give a yellow solid. Purification by flash chromatography on deactivated silica, eluting 30% EtOAc/Hexane gave the title compound **35** as a bright yellow solid (1.7 g, 49% yield over 3 steps).

<sup>1</sup>H NMR (CDCl<sub>3</sub>, 400 MHz): δ = 8.79 (dd, *J* = 4.2, 1.6 Hz, 1H), 8.47 (dd, *J* = 8.5, 1.6 Hz, 1H), 7.49 (dd, *J* = 8.5, 4.2 Hz, 1H), 7.40 (d, *J* = 8.1 Hz, 1H), 6.83 (d, *J* = 8.4 Hz, 1H), 5.02 (br s, 2H).

$^{13}\text{C}$  NMR ( $\text{CDCl}_3$ , 100 MHz):  $\delta = 147.9, 143.4, 138.9, 133.0, 127.4, 126.7, 122.2, 118.2, 109.6$ .

HRMS (ESI)  $m/z$  calc. for  $\text{C}_{10}\text{H}_7\text{ClN}_2$   $[\text{M}+\text{H}]^+$  179.0376 found 179.0370.

### General Procedure for the Preparation of *N*-(5-Chloroquinolin-8-yl) Amides

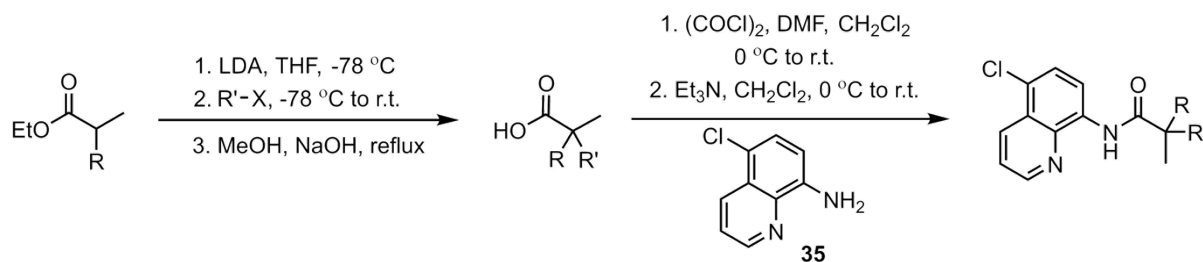

A solution of LDA in THF (C = 2.0 M, 15 mL, 30 mmol, 1.2 equiv.) was added dropwise to a solution of carboxylate ester (3.0 g, 23 mmol, 1.0 equiv.) in THF at -78 °C. The solution was stirred at -78 °C for 3 h. Alkyl halide (2.0 equiv.) was then added dropwise at -78 °C, and the reaction mixture was stirred at room temperature overnight. It was quenched with water and extracted with Et<sub>2</sub>O (3×). The combined organic layers were washed with brine (3×) and dried (MgSO<sub>4</sub>). The solvent was removed under reduced pressure, and the residue was taken up in MeOH (50 mL) and combined with solid NaOH (9.2 g, 230 mmol, 10 equiv.). The reaction mixture was heated at reflux overnight. After cooling to room temperature, the solution was diluted with water and washed with Et<sub>2</sub>O (3×). The aqueous layer was acidified to pH 1 with 3 M aqueous HCl solution and extracted with CH<sub>2</sub>Cl<sub>2</sub> (3×), and dried (MgSO<sub>4</sub>). The solvent was removed under reduced pressure to give the crude carboxylic acid, which was used directly for the next step without further purification.

Oxalyl chloride (5.04 mmol, 0.43 mL, 1.8 equiv.) was added dropwise to a solution of the carboxylic acid (4.2 mmol, 1.5 equiv.) in CH<sub>2</sub>Cl<sub>2</sub> (5 mL) and DMF (3 drops) at 0 °C. The reaction mixture was stirred at room temperature overnight. The solvent was removed under reduced pressure, and the residue dried under vacuum, taken up in CH<sub>2</sub>Cl<sub>2</sub> (5 mL) and added dropwise to a solution of 5-chloro-8-aminoquinoline **35** (0.5 g, 2.8 mmol, 1.0 equiv.) and Et<sub>3</sub>N (0.6 mL, 4.2 mmol, 1.5 equiv.) in CH<sub>2</sub>Cl<sub>2</sub> (5 mL) at 0 °C. The reaction mixture was stirred at room temperature for 5 h. It was diluted with CH<sub>2</sub>Cl<sub>2</sub>, washed with brine (3×) and dried (MgSO<sub>4</sub>). The solvent was removed under reduced pressure, and the

residue was purified by flash chromatography on deactivated silica, eluting with EtOAc/*n*-pentane), to give the *N*-(5-chloroquinolin-8-yl)amides.

### Substrate Characterisation Data

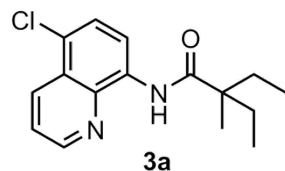

***N*-(5-Chloroquinolin-8-yl)-2-ethyl-2-methylbutanamide (3a)**: obtained as a white solid (66%)

$^1\text{H}$  NMR ( $\text{CDCl}_3$ , 400 MHz):  $\delta$  = 10.16 (br s, 1H), 8.86 (dd,  $J$  = 4.2, 1.3 Hz, 1H), 8.77 (d,  $J$  = 8.4 Hz, 1H), 8.55 (dd,  $J$  = 8.5, 1.2 Hz, 1H), 7.59 (d,  $J$  = 8.4 Hz, 1H), overlapping with 7.56 (dd,  $J$  = 8.5, 4.2 Hz, 1H), 1.92 – 1.83 (m, 2H), 1.67 – 1.58 (m, 2H), 1.34 (s, 3H), 0.93 (t,  $J$  = 7.5 Hz, 6H).

$^{13}\text{C}$  NMR ( $\text{CDCl}_3$ , 100 MHz):  $\delta$  = 176.2, 148.8, 139.5, 134.1, 133.5, 127.4, 126.1, 124.0, 122.4, 116.2, 48.1, 32.6, 20.3, 9.1.

HRMS (ESI)  $m/z$  calc. for  $\text{C}_{16}\text{H}_{20}\text{ClN}_2\text{O}$   $[\text{M}+\text{H}]^+$  291.1264 found 291.1257.

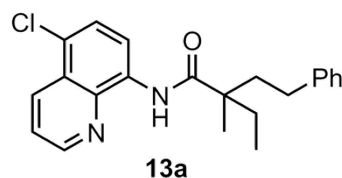

***N*-(5-Chloroquinolin-8-yl)-2-ethyl-2-methyl-4-phenylbutanamide (13a)**: obtained as a colourless oil (55%)

$^1\text{H}$  NMR ( $\text{CDCl}_3$ , 400 MHz):  $\delta$  = 10.24 (br s, 1H), 8.87 (dd,  $J$  = 4.2, 1.5 Hz, 1H), 8.78 (d,  $J$  = 8.3 Hz, 1H), 8.57 (dd,  $J$  = 8.6, 1.5 Hz, 1H), 7.61 (d,  $J$  = 8.4 Hz, 1H), 7.58 (dd,  $J$  = 8.6, 4.2 Hz, 1H), 7.26 – 7.13 (m, 5H), 2.74 – 2.57 (m, 2H), 2.20 – 2.21 (m, 1H), 1.98 – 1.83 (m, 2H), 1.76 – 1.68 (m, 2H), 1.46 (s, 3H), 0.98 (t,  $J$  = 7.5 Hz, 3H).

$^{13}\text{C}$  NMR ( $\text{CDCl}_3$ , 100 MHz):  $\delta$  = 175.7, 148.9, 142.4, 139.5, 133.9, 133.5, 128.5, 128.4, 127.4, 126.1, 126.0, 125.9, 124.2, 122.4, 116.4, 47.9, 42.2, 33.1, 31.3, 20.9, 9.1.

HRMS (ESI)  $m/z$  calc. for  $\text{C}_{22}\text{H}_{24}\text{ClN}_2\text{O}$   $[\text{M}+\text{H}]^+$  367.1577 found 367.1572.

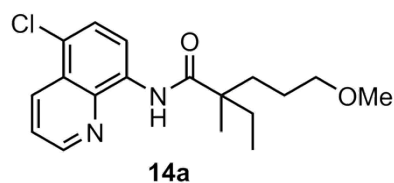

***N*-(5-Chloroquinolin-8-yl)-2-ethyl-5-methoxy-2-methylpentanamide (14a):** obtained as a yellow oil (70%)

$^1\text{H}$  NMR ( $\text{CDCl}_3$ , 400 MHz):  $\delta$  = 10.17 (br s, 1H), 8.85 (dd,  $J$  = 4.2, 1.6 Hz, 1H), 8.75 (d,  $J$  = 8.4 Hz, 1H), 8.55 (dd,  $J$  = 8.5, 1.6 Hz, 1H), 7.58 (d,  $J$  = 8.4 Hz, 1H), 7.56 (dd,  $J$  = 8.5, 4.2 Hz, 1H), 3.40 – 3.35 (m, 2H), 3.28 (s, 3H), 1.92 – 1.83 (m, 2H), 1.72 – 1.55 (m, 4H), 1.37 (s, 3H), 0.94 (t,  $J$  = 7.5, 3H).

$^{13}\text{C}$  NMR ( $\text{CDCl}_3$ , 100 MHz):  $\delta$  = 176.0, 148.8, 139.5, 134.0, 133.5, 127.4, 126.0, 124.1, 122.4, 116.3, 73.1, 58.6, 47.5, 36.4, 33.0, 25.0, 20.7, 9.1.

HRMS (ESI)  $m/z$  calc. for  $\text{C}_{18}\text{H}_{23}\text{ClN}_2\text{O}_2$   $[\text{M}]^+$  334.1448 found 334.1444.

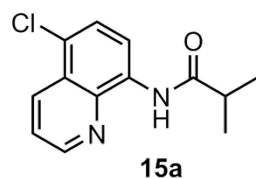

***N*-(5-Chloroquinolin-8-yl)isobutyramide (15a):** obtained as a white solid (80%)

$^1\text{H}$  NMR ( $\text{CDCl}_3$ , 400 MHz):  $\delta$  = 9.85 (br s, 1H), 8.84 (dd,  $J$  = 4.2, 1.4 Hz, 1H), 8.74 (d,  $J$  = 8.4 Hz, 1H), 8.56 (dd,  $J$  = 8.5, 1.4 Hz, 1H), 7.59 (d,  $J$  = 8.4 Hz), overlapping with 7.57 (dd,  $J$  = 8.5, 4.2 Hz, 1H), 2.76 (septet,  $J$  = 6.9 Hz, 1H), 1.35 (d,  $J$  = 6.9 Hz, 6H).

$^{13}\text{C}$  NMR ( $\text{CDCl}_3$ , 100 MHz):  $\delta$  = 175.9, 148.7, 139.1, 134.0, 133.6, 127.4, 126.0, 124.2, 122.4, 116.5, 37.3, 19.8.

HRMS (ESI)  $m/z$  calc. for  $\text{C}_{13}\text{H}_{14}\text{ClN}_2\text{O}$   $[\text{M}+\text{H}]^+$  249.0795 found 249.0804.

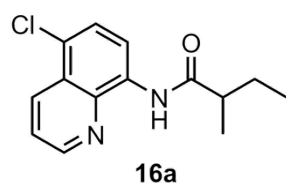

***N*-(5-Chloroquinolin-8-yl)-2-methylbutanamide (16a):** obtained as a white solid (90%)

$^1\text{H}$  NMR ( $\text{CDCl}_3$ , 400 MHz):  $\delta$  = 9.82 (br s, 1H), 8.85 (dd,  $J$  = 4.2, 1.4 Hz, 1H), 8.76 (d,  $J$  = 8.4 Hz, 1H), 8.56 (dd,  $J$  = 8.5, 1.3 Hz, 1H), 7.59 (d,  $J$  = 8.4 Hz, 1H), overlapping with 7.57 (dd,  $J$  = 8.5, 4.2 Hz, 1H), 2.56 – 2.50 (m, 1H), 1.90 – 1.83 (m, 1H), 1.65 – 1.58 (m, 1H), 1.32 (d,  $J$  = 6.9 Hz, 3H), 1.01 (t,  $J$  = 7.4 Hz, 3H).

$^{13}\text{C}$  NMR ( $\text{CDCl}_3$ , 100 MHz):  $\delta$  = 175.5, 148.7, 139.1, 134.0, 133.6, 127.4, 126.0, 124.2, 122.4, 116.5, 44.7, 27.6, 17.7, 12.1.

HRMS (ESI)  $m/z$  calc. for  $\text{C}_{14}\text{H}_{16}\text{ClN}_2\text{O}$   $[\text{M}+\text{H}]^+$  263.0951 found 263.1005.

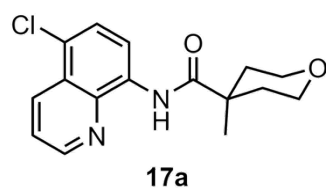

***N*-(5-Chloroquinolin-8-yl)-4-methyltetrahydro-2H-pyran-4-carboxamide (17a):** obtained as a white solid (83%)

$^1\text{H}$  NMR ( $\text{CDCl}_3$ , 400 MHz):  $\delta$  = 10.18 (br s, 1H), 8.85 (dd,  $J$  = 4.2, 1.3 Hz, 1H), 8.73 (d,  $J$  = 8.4 Hz, 1H), 8.57 (dd,  $J$  = 8.5, 1.4 Hz, 1H), 7.61 (d,  $J$  = 8.4 Hz, 1H), overlapping with 7.58 (dd,  $J$  = 8.5, 4.2 Hz, 1H), 3.89 – 3.80 (m, 2H), 3.73 (ddd,  $J$  = 11.7, 8.5, 3.0 Hz, 2H), 2.26 (dt,  $J$  = 13.9, 3.8 Hz, 2H), 1.74 (ddd,  $J$  = 13.1, 8.5, 3.8 Hz, 2H), 1.45 (s, 3H).

$^{13}\text{C}$  NMR ( $\text{CDCl}_3$ , 100 MHz):  $\delta$  = 175.4, 148.9, 139.3, 133.8, 133.6, 127.4, 126.1, 124.4, 122.5, 116.4, 65.0, 42.1, 35.6, 26.1.

HRMS (ESI)  $m/z$  calc. for  $\text{C}_{16}\text{H}_{18}\text{ClN}_2\text{O}_2$   $[\text{M}+\text{H}]^+$  305.1057 found 305.1045

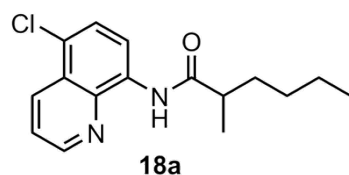

***N*-(5-Chloroquinolin-8-yl)-2-methylhexanamide (18a):** obtained as a colourless oil (88%)

$^1\text{H}$  NMR ( $\text{CDCl}_3$ , 400 MHz):  $\delta$  = 9.81 (br s, 1H), 8.85 (dd,  $J$  = 4.2, 1.5 Hz, 1H), 8.76 (d,  $J$  = 8.4 Hz, 1H), 8.56 (dd,  $J$  = 8.5, 1.4 Hz, 1H), 7.59 (d,  $J$  = 8.4 Hz, 1H), overlapping with 7.57 (dd,  $J$  = 8.5, 4.2 Hz, 1H), 2.63 – 2.55 (m, 1H), 1.90 – 1.76 (m, 1H), 1.61 – 1.49 (m, 1H), 1.41 – 1.34 (m, 4H), 1.32 (d,  $J$  = 6.9 Hz, 3H), 0.89 (t,  $J$  = 7.0 Hz, 3H).

$^{13}\text{C}$  NMR ( $\text{CDCl}_3$ , 100 MHz):  $\delta = 175.7, 148.7, 139.1, 134.0, 133.6, 127.4, 126.0, 124.2, 122.4, 116.5, 43.2, 34.3, 29.8, 22.9, 18.1, 14.1$ .

HRMS (ESI)  $m/z$  calc. for  $\text{C}_{16}\text{H}_{20}\text{ClN}_2\text{O}$   $[\text{M}+\text{H}]^+$  291.1264 found 291.1267

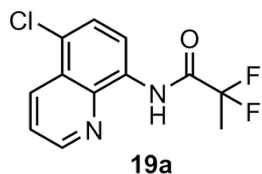

***N*-(5-Chloroquinolin-8-yl)-2,2-difluoropropanamide (19a)**: obtained as a white solid (76%)

$^1\text{H}$  NMR ( $\text{CDCl}_3$ , 400 MHz):  $\delta = 10.66$  (br s, 1H), 8.90 (dd,  $J = 4.2, 1.3$  Hz, 1H), 8.69 (d,  $J = 8.4$  Hz, 1H), 8.58 (dd,  $J = 8.5, 1.3$  Hz, 1H), 7.63 (d,  $J = 8.4$  Hz, 1H), overlapping with 7.61 (dd,  $J = 8.4, 4.2$  Hz, 1H), 1.97 (t,  $J = 19.2$  Hz, 3H).

$^{19}\text{F}$  NMR ( $\text{CDCl}_3$ , 376 MHz):  $\delta = -98.78$  (qd,  $J = 19.1, 2.6$  Hz).

$^{13}\text{C}$  NMR ( $\text{CDCl}_3$ , 100 MHz):  $\delta = 162.7$  (t,  $J = 29.1$  Hz) 149.4, 139.3, 133.6, 132.2, 127.1, 126.1, 122.8, 117.4 (t,  $J = 249.6$  Hz), 117.2, 21.2 (t,  $J = 25.5$  Hz).

HRMS (ESI)  $m/z$  calc. for  $\text{C}_{12}\text{H}_{10}\text{ClF}_2\text{N}_2\text{O}$   $[\text{M}+\text{H}]^+$  271.0450 found 271.0448

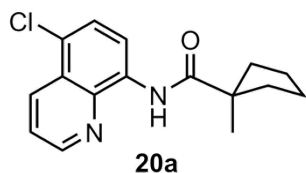

***N*-(5-Chloroquinolin-8-yl)-1-methylcyclopentanecarboxamide (20a)**: obtained as a colourless solid (77%)

$^1\text{H}$  NMR ( $\text{CDCl}_3$ , 400 MHz):  $\delta = 10.13$  (br s, 1H), 8.85 (dd,  $J = 4.2, 1.6$  Hz, 1H), 8.73 (d,  $J = 8.4$  Hz, 1H), 8.55 (dd,  $J = 8.5, 1.6$  Hz, 1H), 7.58 (d,  $J = 8.4$  Hz, 1H), 7.56 (dd,  $J = 8.5, 4.2$  Hz, 1H), 2.29 – 2.26 (m, 2H), 1.84 – 1.79 (m, 4H), 1.72 – 1.66 (m, 2H), 1.47 (s, 3H).

$^{13}\text{C}$  NMR ( $\text{CDCl}_3$ , 100 MHz):  $\delta = 177.6, 148.8, 139.4, 134.3, 133.5, 127.4, 126.0, 124.0, 122.4, 116.2, 51.6, 38.1, 25.7, 25.1$ .

HRMS (ESI)  $m/z$  calc. for  $\text{C}_{16}\text{H}_{18}\text{ClN}_2\text{O}$   $[\text{M}+\text{H}]^+$  289.1108 found 289.1101

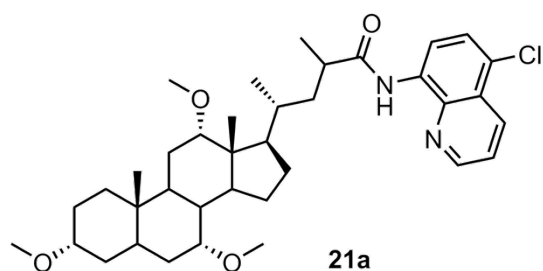

**(4R)-N-(5-Chloroquinolin-8-yl)-2-methyl-4-((3R,7R,10S,12S,13R,17R)-3,7,12-trimethoxy-10,13-dimethylhexadecahydro-1H-cyclopenta[a]phenanthren-17-yl)pentanamide (21a):** obtained as a white solid

$^1\text{H}$  NMR ( $\text{CDCl}_3$ , 400 MHz):  $\delta$  = 9.82 (br s, 1H), 9.87 (dd,  $J$  = 4.4, 1.6 Hz, 1H), 8.73 (d,  $J$  = 8.4 Hz, 1H), 8.62 (dd,  $J$  = 8.8, 1.6 Hz, 1H), 7.60 – 7.55 (m, 2H), 3.93 (m, 1H), 3.32 (s, 3H), 3.25 (s, 3H), 3.20 (s, 3H), 3.14 – 3.13 (m, 1H), 3.01 – 2.95 (m, 1H), 2.67 – 2.62 (m, 1H), 2.23 – 1.87 (m, 6H), 1.84 – 1.66 (m, 7H), 1.61 – 1.43 (m, 5H), 1.34 – 1.56 (m, 7H), overlapping with 1.27 (d,  $J$  = 6.8 Hz, 3H), 1.07 – 0.96 (m, 1H) overlapping with 1.00 (d,  $J$  = 6.0 Hz, 3H), 0.93 – 0.83 (m, 5H), 0.69 (s, 3H).

$^{13}\text{C}$  NMR ( $\text{CDCl}_3$ , 100 MHz):  $\delta$  = 176.3, 148.7, 139.2, 134.1, 133.5, 127.4, 126.0, 124.1, 122.4, 116.5, 82.1, 80.8, 77.1, 56.0, 55.8, 55.3, 47.4, 46.4, 42.8, 42.1, 40.4, 39.8, 35.4, 35.0, 34.5, 33.9, 28.1, 27.9, 27.8, 26.9, 23.3, 23.0, 22.1, 17.7, 17.0, 14.3, 12.7.

HRMS (ESI)  $m/z$  calc. for  $\text{C}_{37}\text{H}_{54}\text{ClN}_2\text{O}_4$   $[\text{M}+\text{H}]^+$  625.3772 found 625.3765

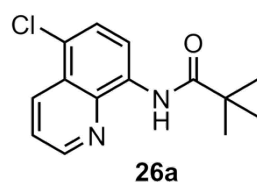

**N-(5-Chloroquinolin-8-yl)pivalamide (26a):** obtained as a colorless solid (97% yield)

$^1\text{H}$  NMR ( $\text{CDCl}_3$ , 400 MHz):  $\delta$  = 10.21 (br s, 1H), 8.85 (dd,  $J$  = 4.2, 1.6 Hz, 1H), 8.74 (d,  $J$  = 8.4 Hz, 1H), 8.55 (dd,  $J$  = 8.5, 1.6 Hz, 1H), 7.58 (d,  $J$  = 8.4 Hz, 1H), 7.56 (dd,  $J$  = 8.5, 4.2 Hz, 1H), 1.42 (s, 9H).

$^{13}\text{C}$  NMR ( $\text{CDCl}_3$ , 100 MHz):  $\delta$  = 177.4, 148.8, 139.5, 134.1, 133.5, 127.4, 126.0, 124.1, 122.4, 116.3, 40.5, 27.8.

HRMS (ESI)  $m/z$  calc. for  $\text{C}_{14}\text{H}_{16}\text{ClN}_2\text{O}$   $[\text{M}+\text{H}]^+$  263.0951, found 263.0946.



## General Procedure for the Preparation of the Charge-Tag Complex

### *N*-(5-(4-(Dimethylamino)phenyl)quinolin-8-yl)-2-ethyl-2-methylbutanamide (**36**)

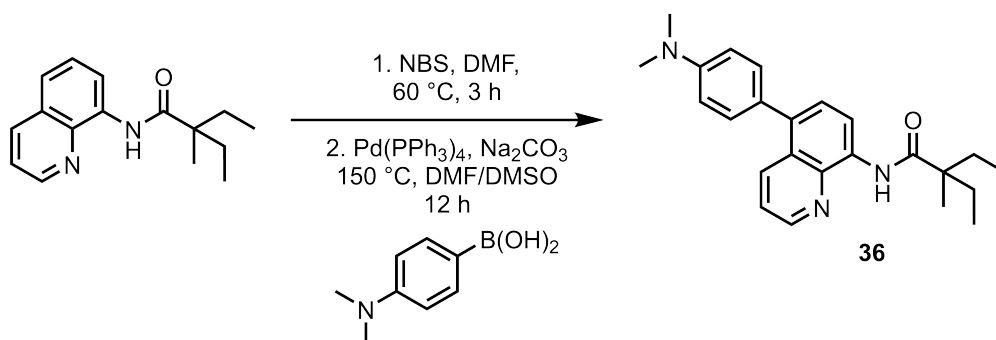

*N*-Bromosuccinimide (0.23 g, 1.29 mmol, 1.1 equiv.) was added in one portion to a solution of 2-ethyl-2-methyl-*N*-(quinolin-8-yl)butanamide (0.3 g, 1.17 mmol, 1.0 equiv.) in anhydrous DMF (5 mL) under nitrogen, and the reaction mixture was heated at 60 °C for 3 hours. After cooling to room temperature, Pd(PPh<sub>3</sub>)<sub>4</sub> (0.14 g, 0.12 mmol, 0.1 equiv.), 4-(dimethylamino)phenylboronic acid (0.39 g, 2.34 mmol, 2.0 equiv.), sodium carbonate (0.25 g, 2.34 mmol, 2.0 equiv.) and anhydrous DMSO (5 mL) were added to the reaction mixture, and it was heated at 150 °C for 12 hours. The suspension was filtered through a plug of Celite with ethyl acetate and the filtrate was washed with brine (5×) and dried (MgSO<sub>4</sub>). Purification by flash chromatography on deactivated silica, eluting with 10% EtOAc/*n*-hexane, gave the title compound **36** as a yellow solid (0.35 g, 80% yield).

<sup>1</sup>H NMR (CDCl<sub>3</sub>, 400 MHz): δ = 10.30 (br s, 1H), 8.86 (d, *J* = 8.0 Hz, 1H), 8.82 (dd, *J* = 4.0, 1.2 Hz, 1H), 8.38 (dd, *J* = 8.8, 1.2 Hz, 1H), 7.49 (d, *J* = 8.0 Hz, 1H), 7.40 (dd, *J* = 8.4, 4.0 Hz, 1H), 7.35 (d, *J* = 8.8 Hz, 2H), 6.85 (d, *J* = 8.8 Hz, 2H), 3.03 (s, 6H), 1.96 – 1.87 (m, 2H), 1.69 – 1.60 (m, 2H), 1.38 (s, 3H), 0.96 (t, *J* = 7.2, 3H).

<sup>13</sup>C NMR (CDCl<sub>3</sub>, 100 MHz): δ = 176.0, 150.0, 148.0, 139.1, 135.2, 134.4, 133.4, 130.9, 127.7, 127.3, 126.7, 121.2, 116.0, 112.5, 48.1, 40.7, 32.7, 20.3, 9.2.

HRMS (ESI) *m/z* calc. for C<sub>24</sub>H<sub>29</sub>N<sub>3</sub>O [M+H]<sup>+</sup> 376.2389, found 376.2384.

#### 4-(8-(2-Ethyl-2-methylbutanamido)quinolin-5-yl)-*N,N,N*-trimethylbenzenaminium hexafluorophosphate (4a)

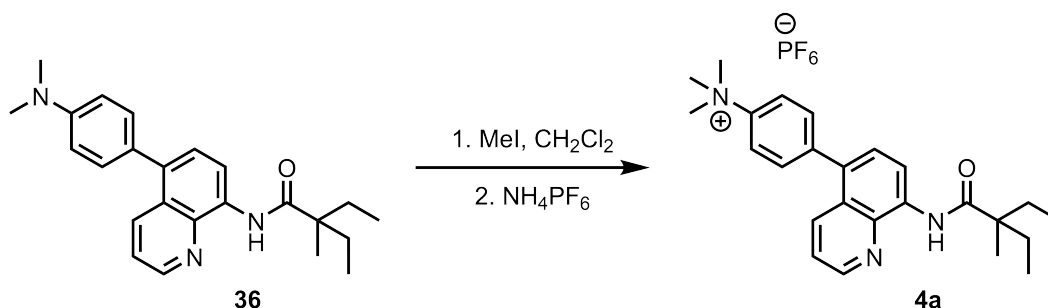

A solution of iodomethane (0.66 mL, 10.6 mmol, 20 equiv.) and *N*-(5-(4-(dimethylamino)phenyl)quinolin-8-yl)-2-ethyl-2-methylbutanamide (0.2 g, 0.53 mmol, 1.0 equiv.) in dichloromethane (10 mL), was heated at reflux for 24 hours. A white precipitate was collected by vacuum filtration, suspended in dichloromethane and washed with saturated, aqueous NH<sub>4</sub>PF<sub>6</sub> solution (3×). The solvent was removed under reduced pressure to give the title compound **4a** as a beige solid (0.26 g, 93 % yield).

<sup>1</sup>H NMR (CD<sub>3</sub>CN, 400 MHz): δ = 10.28 (br s, 1H), 8.92 (dd, *J* = 4.4, 1.6 Hz, 1H), 8.80 (d, *J* = 8.0 Hz, 1H), 8.22 (dd, *J* = 8.4 Hz, 1.2 Hz, 1H), 7.91 – 7.88 (m, 2H), 7.72 – 7.69 (m, 2H), 7.56 (dd, *J* = 8.4, 4.4 Hz, 1H), overlapping with 7.53 (d, *J* = 8.0 Hz, 1H), 3.62 (s, 9H), 1.86 – 1.80 (m, 2H), 1.64 – 1.58 (m, 2H), 1.31 (s, 3H), 0.89 (t, *J* = 7.6 Hz, 6H).

<sup>13</sup>C NMR (CD<sub>3</sub>CN, 100 MHz): δ = 176.1, 149.4, 146.5, 141.9, 138.9, 135.4, 134.4, 132.2, 131.7, 128.7, 126.3, 123.0, 120.8, 115.5, 57.6, 48.3, 32.7, 19.9, 8.9.

HRMS (ESI) *m/z* calc. for [C<sub>25</sub>H<sub>32</sub>N<sub>3</sub>O]<sup>+</sup> 390.2540 found 390.2536.

#### General Procedure for the Preparation of Cyclopalladated Complexes

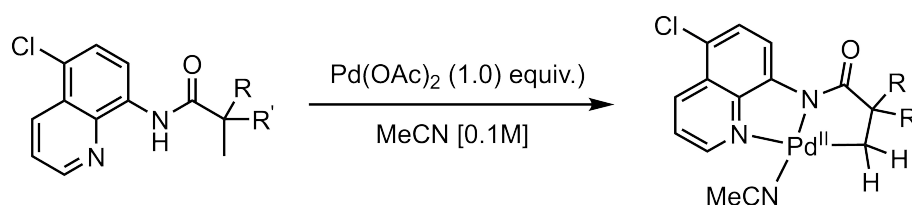

Amide (1.0 mmol) was dissolved in MeCN (10 mL). Pd(OAc)<sub>2</sub> (1 mmol, 1.0 equiv.) was added to the solution, and it was stirred under N<sub>2</sub> atmosphere at room temperature until a

precipitate formed. The precipitate was collected by vacuum filtration and dried under vacuum to yield the cyclopalladated complex as a bright yellow solid.

### Cyclopalladated Complexes Characterisation Data

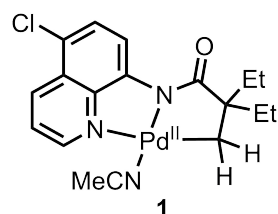

$^1\text{H}$  NMR ( $\text{CDCl}_3$ , 400 MHz):  $\delta$  = 9.10 (d,  $J$  = 8.6 Hz, 1H), 8.52 (d,  $J$  = 8.4 Hz, 1H), 8.33 (d,  $J$  = 3.8 Hz, 1H), 7.51 (d,  $J$  = 8.6 Hz, 1H), 7.40 (dd,  $J$  = 8.3, 4.5 Hz, 1H), 2.36 (s, 2H), 1.80 (s, 3H), 1.63 (dq,  $J$  = 14.3, 7.2 Hz, 2H), 1.42 (dq,  $J$  = 14.2, 7.2 Hz, 2H), 0.96 (t,  $J$  = 7.3 Hz, 6H).

$^{13}\text{C}$  NMR ( $\text{CDCl}_3$ , 100 MHz):  $\delta$  = 188.3, 146.7, 146.2, 145.6, 134.8, 128.9, 127.4, 121.3, 120.3, 118.6, 56.6, 34.1, 18.6, 9.6, 3.6.

HRMS (ESI)  $m/z$  calc. for  $\text{C}_{18}\text{H}_{21}\text{ClN}_3\text{OPd}$   $[\text{M}+\text{H}]^+$  436.0408 found 436.0405

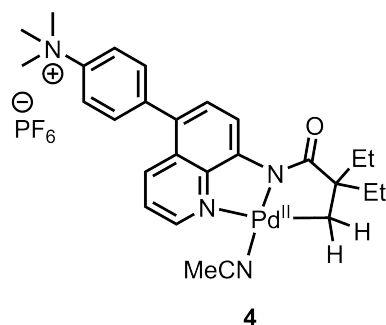

$^1\text{H}$  NMR ( $\text{CD}_3\text{CN}$ , 400 MHz):  $\delta$  = 9.15 (d,  $J$  = 8.4 Hz, 1H), 8.67 (dd,  $J$  = 4.4, 1.2 Hz, 1H), 8.33 (dd,  $J$  = 8.8, 1.2 Hz, 1H), 7.91 – 7.89 (m, 2H), 7.72 – 7.70 (m, 2H), 7.56 (dd,  $J$  = 8.8, 4.4 Hz, 1H), 7.49 (d,  $J$  = 8.4 Hz, 1H), 3.62 (s, 9H), 1.98 (s, 3H), 1.77 (s, 2H), 1.61 – 1.52 (m, 2H), 1.43 – 1.35 (m, 2H), 0.93 (t,  $J$  = 7.6 Hz, 6H).

$^{13}\text{C}$  NMR ( $\text{CD}_3\text{CN}$ , 100 MHz):  $\delta$  = 188.5, 148.4, 148.0, 146.6, 145.5, 142.3, 136.3, 132.6, 130.7, 129.1, 128.5, 122.7, 121.2, 120.2, 58.1, 57.2, 34.9, 17.7, 9.8.

HRMS (ESI)  $m/z$  calc. for  $[\text{C}_{27}\text{H}_{33}\text{N}_4\text{OPd}^+]$  535.1684 found 535.1680

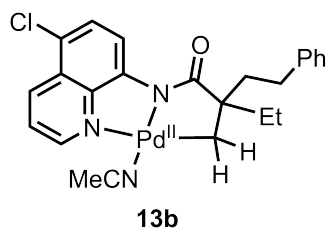

$^1\text{H}$  NMR ( $\text{CDCl}_3$ , 400 MHz):  $\delta$  = 9.14 (d,  $J$  = 8.8 Hz, 1H), 8.57 (d,  $J$  = 8.4 Hz, 1H), 8.40 (d,  $J$  = 4.4 Hz, 1H), 7.55 (d,  $J$  = 8.8 Hz, 1H), 7.45 (dd,  $J$  = 8.8, 4.4 Hz, 1H), 7.24 – 7.20 (m, 4H), 7.14 – 7.11 (m, 1H), 2.94 – 2.86 (m, 1H), 2.71 – 2.63 (m, 1H), 2.37 (s, 3H), 1.93 – 1.89 (m, 2H), 1.74 – 1.67 (m, 3H), 1.53 – 1.48 (m, 1H), 0.99 (t,  $J$  = 7.2 Hz, 3H)

$^{13}\text{C}$  NMR ( $\text{CDCl}_3$ , 100 MHz):  $\delta$  = 187.9, 146.7, 146.3, 145.7, 144.1, 135.0, 129.1, 128.7, 128.2, 127.5, 125.4, 121.3, 120.5, 120.4, 56.4, 43.7, 34.5, 31.7, 19.1, 9.5, 3.6, 3.5.

HRMS (ESI)  $m/z$  calc. for  $\text{C}_{24}\text{H}_{25}\text{ClN}_3\text{OPd}$  [ $\text{M}+\text{H}$ ] $^+$  512.0721 found 512.0734

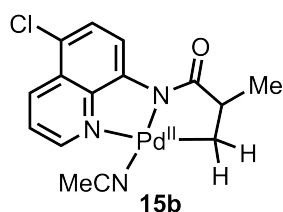

$^1\text{H}$  NMR ( $\text{CDCl}_3$ , 400 MHz):  $\delta$  = 9.00 (d,  $J$  = 8.7 Hz, 1H), 8.53 (d,  $J$  = 8.6 Hz, 1H), 8.29 (d,  $J$  = 4.4 Hz, 1H), 7.52 (d,  $J$  = 8.2 Hz, 1H), 7.38 (dd,  $J$  = 8.4, 4.5 Hz, 1H), 2.79 (h,  $J$  = 7.7, 7.2 Hz, 1H), 2.37 (s, 3H), 2.05 (t,  $J$  = 8.5 Hz, 1H), 1.57 (t,  $J$  = 8.2 Hz, 1H), 1.24 (d,  $J$  = 6.8 Hz, 3H).

$^{13}\text{C}$  NMR ( $\text{CDCl}_3$ , 100 MHz):  $\delta$  = 187.8, 146.7, 146.3, 145.5, 134.9, 129.0, 127.4, 121.3, 120.4, 120.1, 118.6, 47.0, 21.2, 16.2, 3.6.

HRMS (ESI)  $m/z$  calc. for  $\text{C}_{15}\text{H}_{15}\text{ClN}_3\text{OPd}$  [ $\text{M}+\text{H}$ ] $^+$  393.9939 found 393.9931

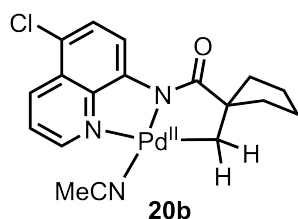

$^1\text{H}$  NMR ( $\text{CDCl}_3$ , 400 MHz):  $\delta$  = 9.08 – 9.00 (m, 1H), 8.48 (d,  $J$  = 8.4 Hz, 1H), 8.24 (d,  $J$  = 4.3 Hz, 1H), 7.50 (d,  $J$  = 8.6 Hz, 1H), 7.34 (dd,  $J$  = 8.3, 4.5 Hz, 1H), 2.37 – 2.34 (m, 2H), 2.08 – 1.97 (m, 2H), 1.86 (s, 2H), 1.79 – 1.58 (m, 6H).

$^{13}\text{C}$  NMR ( $\text{CDCl}_3$ , 100 MHz):  $\delta = 189.4, 146.9, 146.2, 145.4, 134.7, 128.8, 127.3, 121.4, 119.9, 118.7, 60.5, 41.9, 25.5, 25.3, 3.6$ .

HRMS (ESI)  $m/z$  calc. for  $\text{C}_{18}\text{H}_{19}\text{ClN}_3\text{OPd}$   $[\text{M}+\text{H}]^+$  434.0252 found 434.0260

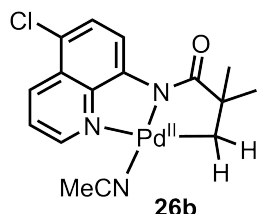

$^1\text{H}$  NMR ( $\text{CDCl}_3$ , 400 MHz):  $\delta = 9.04$  (d,  $J = 8.6$  Hz, 1H),  $8.53$  (d,  $J = 8.5$  Hz, 1H),  $8.33$  (s, 1H),  $7.52$  (d,  $J = 8.6$  Hz, 1H),  $7.40$  (dd,  $J = 8.4, 4.5$  Hz, 1H),  $2.36$  (s, 2H),  $1.84$  (s, 3H),  $1.26$  (s, 6H).

$^{13}\text{C}$  NMR ( $\text{CDCl}_3$ , 100 MHz):  $\delta = 189.7, 147.0, 146.3, 145.5, 134.9, 129.0, 127.4, 121.4, 120.5, 120.2, 118.7, 49.5, 30.2, 25.5, 3.6$ .

HRMS (ESI)  $m/z$  calc. for  $\text{C}_{16}\text{H}_{17}\text{ClN}_3\text{OPd}$   $[\text{M}+\text{H}]^+$  408.0095 found 408.0093.

## General Procedure for the Iodination Reaction

### Procedure A:

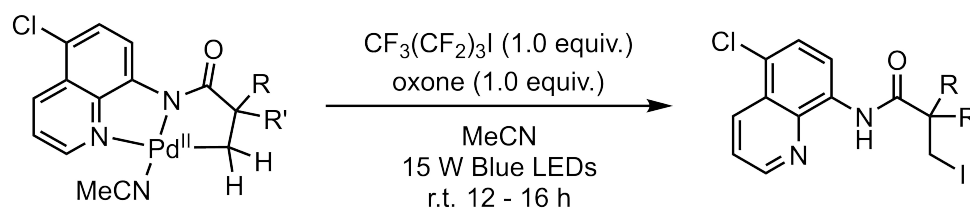

Cyclopalladated complex (0.1 mmol) and oxone (30.7 mg, 0.1 mmol) were placed in a pressure relief sample vial and taken up in MeCN (1 mL). The reaction mixture was sparged with  $\text{N}_2$  for 5 minutes. Perfluorobutyl iodide (0.1 mmol, 1 equiv.) was added via air-tight syringe and the solution was sparged with  $\text{N}_2$  for 1 minute. The cap was wrapped in parafilm and the reaction mixture was stirred for 16 hours at room temperature, whilst being irradiated with 15 W Blue LEDs. The reaction mixture was diluted with  $\text{CH}_2\text{Cl}_2$  and washed with brine. The aqueous layer was re-extracted with  $\text{CH}_2\text{Cl}_2$  (3 $\times$ ) and dried ( $\text{MgSO}_4$ ). The solvent was removed under reduced pressure and the residue was purified by flash chromatography on deactivated silica, eluting 10-20% EtOAc/hexane.

## Procedure B:

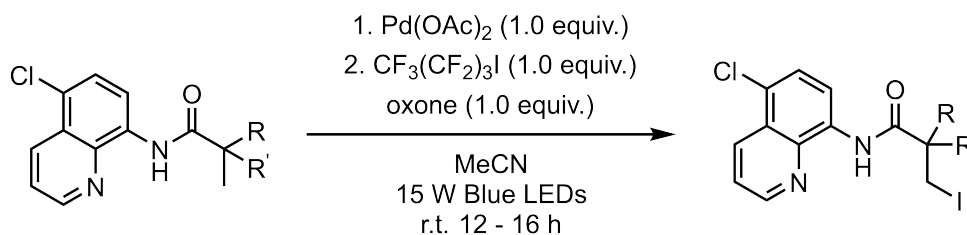

Amide (0.1 mmol) and Pd(OAc)<sub>2</sub> (0.1 mmol) were placed in a pressure relief sample vial and dissolved in acetonitrile (1 mL). The solution was stirred at room temperature for 3 hours. Oxone (30.7 mg, 0.1 mmol) was added and the reaction mixture was sparged with N<sub>2</sub> for 5 minutes. Perfluorobutyl iodide (0.1 mmol, 1 equiv.) was added via air-tight syringe and the solution was sparged with N<sub>2</sub> for 1 minute. The cap was wrapped in parafilm and the reaction mixture was stirred for 16 hours at room temperature, whilst being irradiated with 15 W Blue LEDs. The reaction mixture was diluted with CH<sub>2</sub>Cl<sub>2</sub> and washed with brine. The aqueous layer was re-extracted with CH<sub>2</sub>Cl<sub>2</sub> (3×) and dried (MgSO<sub>4</sub>). The solvent was removed under reduced pressure and the residue was purified by flash chromatography on deactivated silica, eluting 10-20% EtOAc/hexane.

## Product Characterisation Data

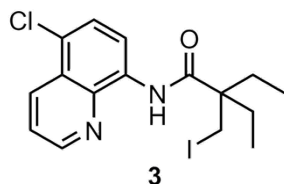

***N*-(5-Chloroquinolin-8-yl)-2-ethyl-2-(iodomethyl)butanamide (3):** Prepared according to Procedure A. Obtained as a white solid (37 mg, 89%)

<sup>1</sup>H NMR (CDCl<sub>3</sub>, 400 MHz): δ = 10.24 (br s, 1H), 8.88 (dd, *J* = 4.2, 1.4 Hz, 1H), 8.74 (d, *J* = 8.4 Hz, 1H), 8.58 (dd, *J* = 8.5, 1.4 Hz, 1H), 7.61 (d, *J* = 8.5 Hz, 2H), 7.58 (dd, *J* = 8.4, 4.2 Hz, 1H) 3.58 (s, 2H), 2.01-1.85 (m, 4H), 0.93 (t, *J* = 7.4 Hz, 6H).

<sup>13</sup>C NMR (CDCl<sub>3</sub>, 100 MHz): δ = 171.9, 149.0, 139.4, 133.6, 133.5, 127.4, 126.1, 124.6, 122.5, 116.5, 51.3, 28.8, 13.1, 8.8.

HRMS (ESI) *m/z* calc. for C<sub>16</sub>H<sub>19</sub>ClIN<sub>2</sub>O [M+H]<sup>+</sup> 417.0231 found 417.0226.

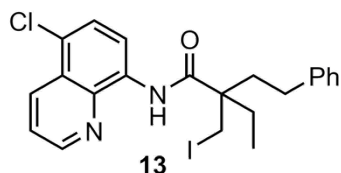

***N*-(5-Chloroquinolin-8-yl)-2-ethyl-2-(iodomethyl)-4-phenylbutanamide (13):**

Prepared according to General Procedure A. Obtained as a white solid (34 mg, 70%)

$^1\text{H}$  NMR ( $\text{CDCl}_3$ , 400 MHz):  $\delta$  = 10.31 (br s, 1H), 8.88 (dd,  $J$  = 4.2, 1.5 Hz, 1H), 8.74 (d,  $J$  = 8.4 Hz, 1H), 8.59 (dd,  $J$  = 8.5, 1.5 Hz, 1H), 7.63 (d,  $J$  = 8.4 Hz, 1H), overlapping with 7.60 (dd,  $J$  = 8.5, 4.2 Hz, 1H), 7.22 (m, 5H), 3.78 – 3.58 (m, 2H), 2.65 – 2.57 (m, 2H), 2.27 – 2.07 (m, 2H), 2.03 – 1.96 (m, 2H), 0.98 (t,  $J$  = 7.4 Hz, 3H).

$^{13}\text{C}$  NMR ( $\text{CDCl}_3$ , 100 MHz):  $\delta$  = 171.3, 149.0, 141.4, 139.4, 133.6, 133.4, 128.6, 128.6, 127.4, 126.2, 126.1, 124.8, 122.6, 116.7, 50.8, 39.0, 31.0, 29.7, 13.2, 8.6.

HRMS (ESI)  $m/z$  calc. for  $\text{C}_{22}\text{H}_{23}\text{ClIN}_2\text{O}$   $[\text{M}+\text{H}]^+$  493.0544 found 493.0541.

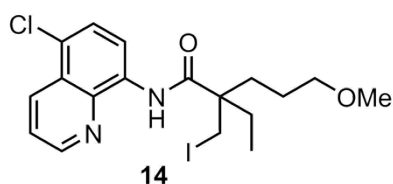

***N*-(5-Chloroquinolin-8-yl)-2-ethyl-2-(iodomethyl)-5-methoxypentanamide (14):**

Prepared according to Procedure B. Obtained as a white solid (30 mg, 66%)

$^1\text{H}$  NMR ( $\text{CDCl}_3$ , 400 MHz):  $\delta$  = 10.24 (br s, 1H), 8.88 (dd,  $J$  = 4.2, 1.4 Hz, 1H), 8.72 (d,  $J$  = 8.4 Hz, 1H), 8.58 (dd,  $J$  = 8.5, 1.4 Hz, 1H), 7.60 (d,  $J$  = 8.4 Hz, 1H), overlapping with 7.59 (dd,  $J$  = 8.5, 4.2 Hz, 1H). 3.64 – 3.54 (m, 2H), 3.40 (t,  $J$  = 6.4 Hz, 2H), 3.28 (s, 3H), 2.01-1.83 (m, 4H), 1.64 – 1.49 (m, 2H), 0.94 (t,  $J$  = 7.4 Hz, 3H).

$^{13}\text{C}$  NMR ( $\text{CDCl}_3$ , 100 MHz):  $\delta$  = 171.7, 149.0, 139.4, 133.6, 133.5, 127.4, 126.1, 124.7, 122.5, 116.6, 72.6, 58.6, 50.7, 32.8, 29.1, 24.7, 13.2, 8.6.

HRMS (ESI)  $m/z$  calc. for  $\text{C}_{18}\text{H}_{23}\text{ClIN}_2\text{O}$   $[\text{M}+\text{H}]^+$  461.0493 found 461.0488.

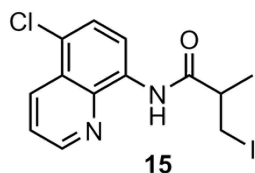

***N*-(5-Chloroquinolin-8-yl)-3-iodo-2-methylpropanamide (15):** Prepared according to Procedure A. Obtained as a white solid (28 mg, 75%)

$^1\text{H}$  NMR ( $\text{CDCl}_3$ , 400 MHz):  $\delta$  = 9.89 (s, 1H), 8.87 (dd,  $J$  = 4.2, 1.6 Hz, 1H), 8.74 (d,  $J$  = 8.4 Hz, 1H), 8.58 (dd,  $J$  = 8.5, 1.6 Hz, 1H), 7.64 – 7.55 (m, 2H), 3.57 (dd,  $J$  = 9.8, 7.5 Hz, 1H), 3.33 (dd,  $J$  = 9.8, 6.2 Hz, 1H), 2.99 (h,  $J$  = 6.9 Hz, 1H), 1.47 (d,  $J$  = 6.9 Hz, 3H).

$^{13}\text{C}$  NMR ( $\text{CDCl}_3$ , 100 MHz)  $\delta$  = 172.1, 148.8, 139.0, 133.8, 133.4, 127.4, 126.1, 124.9, 122.6, 117.0, 45.9, 19.4, 7.4.

HRMS (ESI)  $m/z$  calc. for  $\text{C}_{13}\text{H}_{13}\text{ClIN}_2\text{O}$   $[\text{M}+\text{H}]^+$  374.9761 found 374.9768.

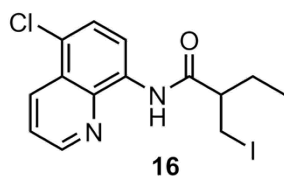

***N*-(5-Chloroquinolin-8-yl)-2-(iodomethyl)butanamide (16):** Prepared according to Procedure B. Obtained as a white solid (34 mg, 87%)

$^1\text{H}$  NMR ( $\text{CDCl}_3$ , 400 MHz):  $\delta$  = 9.88 (br s, 1H), 8.87 (dd,  $J$  = 4.2, 1.4 Hz, 1H), 8.77 (d,  $J$  = 8.4 Hz, 1H), 8.58 (dd,  $J$  = 8.5, 1.3 Hz, 1H), 7.61 (d,  $J$  = 8.4 Hz, 1H), 7.59 (dd,  $J$  = 8.5, 4.2 Hz, 1H), 3.57 – 3.52 (m, 1H), 3.34 (dd,  $J$  = 9.8, 5.3 Hz, 1H), 2.85 – 2.78 (m, 1H), 1.96 – 1.71 (m, 2H), 1.05 (t,  $J$  = 7.4 Hz, 3H).

$^{13}\text{C}$  NMR ( $\text{CDCl}_3$ , 100 MHz)  $\delta$  = 171.8, 148.9, 139.1, 133.6, 133.4, 127.4, 126.1, 124.8, 122.5, 116.8, 53.6, 27.4, 11.9, 5.5.

HRMS (ESI)  $m/z$  calc. for  $\text{C}_{14}\text{H}_{15}\text{ClIN}_2\text{O}$   $[\text{M}+\text{H}]^+$  388.9918 found 388.9913.

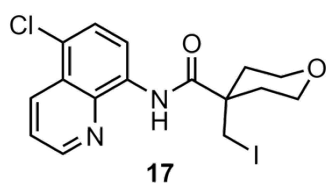

***N*-(5-Chloroquinolin-8-yl)-4-(iodomethyl)tetrahydro-2H-pyran-4-carboxamide (17)**  
Prepared according to Procedure B. Obtained as a white solid (34 mg, 79%)



$^1\text{H}$  NMR ( $\text{CDCl}_3$ , 400 MHz):  $\delta$  = 10.26 (br s, 1H), 8.87 (dd,  $J$  = 4.1, 1.3 Hz, 1H), 8.74 (d,  $J$  = 8.4 Hz, 1H), 8.60 (dd,  $J$  = 8.5, 1.3 Hz, 1H), 7.63 (d,  $J$  = 8.4 Hz, 1H), 7.60 (dd,  $J$  = 8.5, 4.1 Hz, 1H), 3.92 – 3.87 (m, 2H), 3.75 – 3.66 (m, 2H), 3.51 (s, 2H), 2.41 – 2.37 (m, 2H), 1.92 – 1.85 (m, 2H).

$^{13}\text{C}$  NMR ( $\text{CDCl}_3$ , 100 MHz):  $\delta$  = 171.3, 149.0, 139.3, 133.9, 133.1, 127.4, 126.2, 125.1, 122.6, 117.0, 65.0, 46.5, 35.0, 15.7.

HRMS (ESI)  $m/z$  calc. for  $\text{C}_{16}\text{H}_{17}\text{ClIN}_2\text{O}_2$   $[\text{M}+\text{H}]^+$  431.0023 found 431.0016.

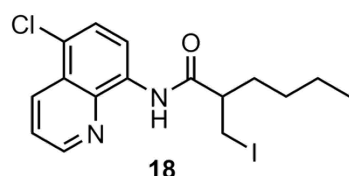

***N*-(5-Chloroquinolin-8-yl)-2-(iodomethyl)hexanamide (18)**: Prepared according to Procedure B. Obtained as a white solid (35 mg, 85%)

$^1\text{H}$  NMR ( $\text{CDCl}_3$ , 400 MHz):  $\delta$  = 9.87 (br s, 1H), 8.88 (dd,  $J$  = 4.2, 1.6 Hz, 1H), 8.76 (d,  $J$  = 8.4 Hz, 1H), 8.58 (dd,  $J$  = 8.5, 1.6 Hz, 1H), 7.61 (d,  $J$  = 8.4 Hz, 1H), 7.59 (dd,  $J$  = 8.5, 4.2 Hz, 1H), 3.56 – 3.51 (m, 1H), 3.33 (dd,  $J$  = 9.8, 5.3 Hz, 1H), 2.85 – 2.78 (m, 1H), 1.86 – 1.72 (m, 1H), 1.77 – 1.63 (m, 1H), 1.45 – 1.33 (m, 4H), 0.88 (t,  $J$  = 7.1 Hz, 3H).

$^{13}\text{C}$  NMR ( $\text{CDCl}_3$ , 100 MHz):  $\delta$  = 172.0, 148.9, 139.1, 133.7, 133.4, 127.4, 126.1, 124.8, 122.5, 116.9, 52.2, 33.9, 29.6, 22.7, 14.0, 5.9.

HRMS (ESI)  $m/z$  calc. for  $\text{C}_{16}\text{H}_{19}\text{ClIN}_2\text{O}$   $[\text{M}+\text{H}]^+$  417.0231 found 417.0223.

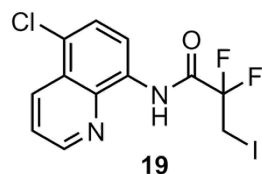

***N*-(5-Chloroquinolin-8-yl)-2,2-difluoro-3-iodopropanamide (19)**: Prepared according to Procedure B. Obtained as a white solid (21 mg, 54%)

$^1\text{H}$  NMR ( $\text{CDCl}_3$ , 400 MHz):  $\delta$  = 10.77 (br s, 1H), 8.92 (dd,  $J$  = 4.2, 1.6 Hz, 1H), 8.70 (d,  $J$  = 8.4 Hz, 1H), 8.61 (dd,  $J$  = 8.5, 1.6 Hz, 1H), 7.66 (d,  $J$  = 8.4 Hz, 1H), 7.65 (dd,  $J$  = 8.8, 4.4 Hz, 1H), 3.81 (t,  $J$  = 15.0 Hz, 2H).

$^{19}\text{F}$  NMR ( $\text{CDCl}_3$ , 376 MHz):  $\delta$  = -100.78 (td,  $J$  = 15.0, 2.3 Hz).

$^{13}\text{C}$  NMR ( $\text{CDCl}_3$ , 125 MHz):  $\delta = 160.0$  (t,  $J = 28.3$  MHz), 149.6, 139.4, 133.7, 132.0, 127.1, 126.6, 126.3, 122.9, 117.5, 114.7 (t,  $J = 253.8$  MHz), 29.9, -0.09 (t,  $J = 5.4$  MHz).

HRMS (ESI)  $m/z$  calc. for  $\text{C}_{12}\text{H}_9\text{ClF}_2\text{IN}_2\text{O}$   $[\text{M}+\text{H}]^+$  396.9416 found 396.9407.

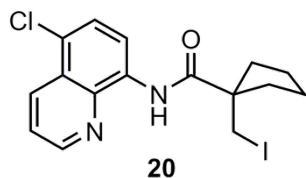

***N*-(5-Chloroquinolin-8-yl)-1-(iodomethyl)cyclopentanecarboxamide (20):** Prepared according to Procedure A. Obtained as a white solid (28 mg, 67%)

$^1\text{H}$  NMR ( $\text{CDCl}_3$ , 400 MHz):  $\delta = 10.20$  (br s, 1H), 8.87 (dd,  $J = 4.2, 1.4$  Hz, 1H), 8.75 (d,  $J = 8.4$  Hz, 1H), 8.57 (dd,  $J = 8.5, 1.4$  Hz, 1H), 7.61 (d,  $J = 8.4$  Hz, 1H), 7.58 (dd,  $J = 8.5, 4.2$  Hz, 1H), 3.60 (s, 2H), 2.41 – 2.38 (m, 2H), 1.98 – 1.83 (m, 6H).

$^{13}\text{C}$  NMR ( $\text{CDCl}_3$ , 100 MHz)  $\delta = 173.6, 149.0, 139.4, 133.6, 133.6, 127.4, 126.1, 124.6, 122.5, 116.5, 57.1, 37.2, 25.1, 15.6$ .

HRMS (ESI)  $m/z$  calc. for  $\text{C}_{16}\text{H}_{17}\text{ClIN}_2\text{O}$   $[\text{M}+\text{H}]^+$  415.0074 found 415.0065.

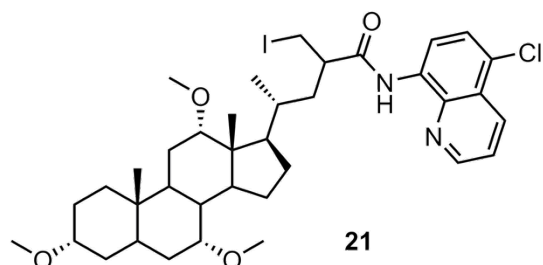

**(4R)-*N*-(5-Chloroquinolin-8-yl)-2-(iodomethyl)-4-((3R,7R,10S,12S,13R,17R)-3,7,12-trimethoxy-10,13-dimethylhexadecahydro-1H-cyclopenta[a]phenanthren-17-yl)pentanamide (21):** Prepared according to Procedure B. Obtained as a yellow oil (63 mg, 84%)

$^1\text{H}$  NMR ( $\text{CDCl}_3$ , 400 MHz):  $\delta = 9.89$  (s, 1H), 9.89 (dd,  $J = 4.4, 1.6$  Hz, 1H), 8.75 (d,  $J = 8.4$  Hz, 1H), 8.58 (dd,  $J = 8.4, 1.6$  Hz, 1H), 7.62 – 7.57 (m, 2H), 3.49 – 3.31 (m, 4H), overlapping with 3.32 (s, 3H), 3.24 (s, 3H), 3.20 (s, 3H), 3.15 – 3.13 (m, 1H), 3.02 – 2.90 (m, 2H), 2.22 – 1.43 (m, 17H), 1.35 – 1.15 (m, 5H), 1.02 (d,  $J = 6.4$  Hz, 3H), 0.93 – 0.86 (m, 1H), overlapping with 0.89 (s, 3H), 0.68 (s, 3H).

$^{13}\text{C}$  NMR ( $\text{CDCl}_3$ , 100 MHz):  $\delta = 172.5, 148.9, 139.2, 133.6, 133.5, 127.4, 126.1, 124.7, 122.5, 116.8, 82.1, 80.9, 77.1, 56.0, 55.8, 55.6, 49.4, 47.3, 46.5, 42.8, 42.1, 40.2, 39.8, 35.4, 35.1, 34.6, 34.3, 28.1, 28.0, 27.9, 26.9, 23.3, 23.0, 22.1, 18.0, 12.7, 5.8$ .

HRMS (ESI)  $m/z$  calc. for  $\text{C}_{37}\text{H}_{53}\text{ClIN}_2\text{O}_4$   $[\text{M}+\text{H}]^+$  751.2739 found 751.2724.

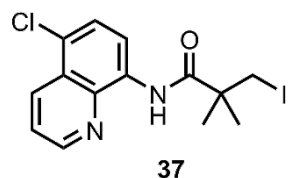

**3-Iodo-N-(5-chloroquinolin-8-yl)-2,2-dimethylpropanamide (37):** Obtained as a white solid (24 mg, 62%)

$^1\text{H}$  NMR (400 MHz,  $\text{CDCl}_3$ )  $\delta$  10.25 (s, 1H), 8.86 (dd,  $J = 4.2, 1.5$  Hz, 1H), 8.73 (d,  $J = 8.4$  Hz, 1H), 8.55 (dd,  $J = 8.5, 1.6$  Hz, 1H), 7.62 – 7.53 (m, 2H), 3.52 (s, 2H), 1.58 (s, 6H).

$^{13}\text{C}$  NMR (101 MHz,  $\text{CDCl}_3$ )  $\delta$  173.1, 148.9, 139.4, 133.5, 127.3, 126.04, 124.7, 122.5, 116.6, 44.7, 25.9, 17.7.

HRMS (ESI)  $m/z$  calc. for  $\text{C}_{14}\text{H}_{15}\text{ClIN}_2\text{O}$   $[\text{M}+\text{H}]^+$  388.9917 found 388.9908

## General Procedure for the Chlorination Reaction

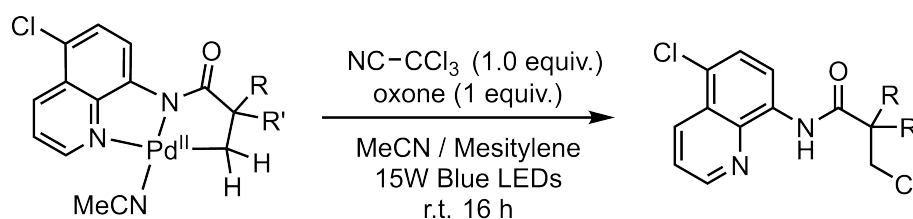

Cyclopalladated complex (0.1 mmol), oxone (30.7 mg, 0.1 mmol) and mesitylene (0.139 mL, 1.0 mmol) were placed in a pressure relief sample vial and taken up in MeCN (1 mL). The reaction mixture was sparged with  $\text{N}_2$  for 5 minutes. Trichloroacetonitrile (0.01 mL, 0.1 mmol) was then added and the solution was sparged with  $\text{N}_2$  for 1 minute. The cap was wrapped in parafilm and the reaction mixture was stirred for 16 hours at room temperature, whilst being irradiated with 15W Blue LEDs. The reaction mixture was diluted with  $\text{CH}_2\text{Cl}_2$  and washed with brine. The aqueous layer was re-extracted with

CH<sub>2</sub>Cl<sub>2</sub> (3×) and dried (MgSO<sub>4</sub>). The solvent was removed under reduced pressure and the residue was purified by flash chromatography on deactivated silica, eluting 10-20% EtOAc/hexane.

### Product Characterization Data

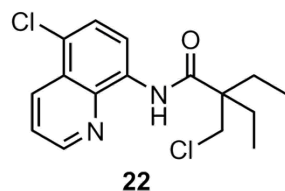

**2-(Chloromethyl)-N-(5-chloroquinolin-8-yl)-2-ethylbutanamide (22):** Obtained as a white solid (22.4 mg, 69%)

<sup>1</sup>H NMR (CDCl<sub>3</sub>, 400 MHz): δ = 10.25 (br s, 1H), 8.88 (dd, *J* = 4.2, 1.5 Hz, 1H), 8.74 (d, *J* = 8.4 Hz, 1H), 8.58 (dd, *J* = 8.5, 1.5 Hz, 1H), 7.64 – 7.54 (m, 2H), 3.88 (s, 2H), 1.98 (dq, *J* = 14.9, 7.5 Hz, 2H), 1.86 (dq, *J* = 14.6, 7.4 Hz, 2H), 0.96 (t, *J* = 7.4 Hz, 6H).

<sup>13</sup>C NMR (CDCl<sub>3</sub>, 100 MHz): δ = 173.22, 148.93, 139.32, 133.75, 133.49, 127.42, 126.14, 124.63, 122.50, 116.72, 52.83, 46.71, 26.63, 8.50.

HRMS (ESI) *m/z* calc. for C<sub>16</sub>H<sub>19</sub>Cl<sub>2</sub>N<sub>2</sub>O [M+H]<sup>+</sup> 325.0874 found 325.0868.

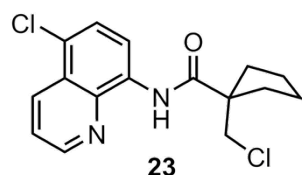

**1-(Chloromethyl)-N-(5-chloroquinolin-8-yl)cyclopentanecarboxamide (23):**

Obtained as a white solid (19.4 mg, 60%)

<sup>1</sup>H NMR (CDCl<sub>3</sub>, 400 MHz): δ = 10.26 (br s, 1H), 8.87 (dd, *J* = 4.2, 1.5 Hz, 1H), 8.75 (d, *J* = 8.4 Hz, 1H), 8.57 (dd, *J* = 8.5, 1.5 Hz, 1H), 7.66 – 7.51 (m, 2H), 3.86 (s, 2H), 2.38 – 2.26 (m, 2H), 2.03 – 1.75 (m, 6H).

<sup>13</sup>C NMR (CDCl<sub>3</sub>, 100 MHz) δ = 173.67, 148.96, 139.43, 133.78, 133.53, 127.36, 126.07, 124.53, 122.47, 116.53, 57.93, 50.84, 34.98, 25.15.

HRMS (ESI) *m/z* calc. for C<sub>16</sub>H<sub>17</sub>Cl<sub>2</sub>N<sub>2</sub>O [M+H]<sup>+</sup> 323.0718 found 323.0718.

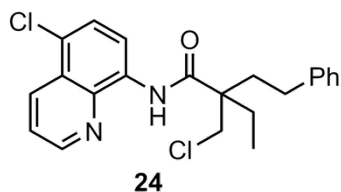

**2-(Chloromethyl)-N-(5-chloroquinolin-8-yl)-2-ethyl-4-phenylbutanamide (24):**

Obtained as a white solid (28.1 mg, 70%)

$^1\text{H}$  NMR ( $\text{CDCl}_3$ , 400 MHz):  $\delta$  = 10.32 (s, 1H), 8.88 (dd,  $J$  = 4.2, 1.5 Hz, 1H), 8.73 (d,  $J$  = 8.4 Hz, 1H), 8.59 (dd,  $J$  = 8.5, 1.5 Hz, 1H), 7.72 – 7.52 (m, 2H), 7.22 (dq,  $J$  = 16.8, 8.7, 8.0 Hz, 5H), 3.97 (q,  $J$  = 11.6 Hz, 2H), 2.64 (dtd,  $J$  = 30.2, 13.0, 5.0 Hz, 2H), 2.25 (td,  $J$  = 13.2, 12.3, 5.4 Hz, 1H), 2.12 – 2.00 (m, 2H), 1.95 (dq,  $J$  = 14.6, 7.4 Hz, 1H), 1.01 (t,  $J$  = 7.4 Hz, 6H).

$^{13}\text{C}$  NMR ( $\text{CDCl}_3$ , 100 MHz):  $\delta$  = 172.80, 149.01, 141.50, 139.42, 133.64, 133.45, 128.59, 128.53, 127.36, 126.20, 126.15, 124.73, 122.57, 116.69, 52.45, 46.76, 36.79, 30.74, 27.29, 8.47.

HRMS (ESI)  $m/z$  calc. for  $\text{C}_{22}\text{H}_{23}\text{Cl}_2\text{N}_2\text{O}$   $[\text{M}+\text{H}]^+$  401.1187 found 401.1186.

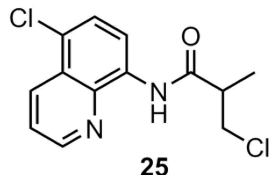

**3-Chloro-N-(5-chloroquinolin-8-yl)-2-methylpropanamide (25):** Obtained as a white solid (15.3 mg, 54%)

$^1\text{H}$  NMR ( $\text{CDCl}_3$ , 400 MHz):  $\delta$  = 9.96 (br s, 1H), 8.87 (dd,  $J$  = 4.2, 1.3 Hz, 1H), 8.75 (d,  $J$  = 8.4 Hz, 1H), 8.59 (dd,  $J$  = 8.5, 1.3 Hz, 1H), 7.66 – 7.51 (m, 2H), 3.91 (dd,  $J$  = 10.8, 7.8 Hz, 1H), 3.68 (dd,  $J$  = 10.8, 5.7 Hz, 1H), 3.01 (h,  $J$  = 7.0 Hz, 1H), 1.45 (d,  $J$  = 7.0 Hz, 3H).

$^{13}\text{C}$  NMR ( $\text{CDCl}_3$ , 100 MHz):  $\delta$  = 171.98, 148.80, 138.97, 133.82, 133.50, 127.42, 126.12, 124.85, 122.54, 116.98, 46.49, 45.62, 16.36.

HRMS (ESI)  $m/z$  calc. for  $\text{C}_{13}\text{H}_{13}\text{Cl}_2\text{N}_2\text{O}$   $[\text{M}+\text{H}]^+$  283.0405 found 283.0399

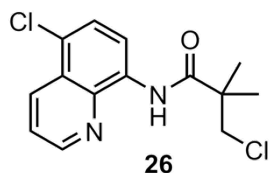

**3-Chloro-N-(5-chloroquinolin-8-yl)-2,2-dimethylpropanamide (26):** Obtained as a white solid (19.5 mg, 65%)

$^1\text{H}$  NMR ( $\text{CDCl}_3$ , 400 MHz):  $\delta$  = 10.3 (br s, 1H), 8.88 (dd,  $J$  = 4.0, 1.6 Hz, 1H), 8.75 (d,  $J$  = 8.4 Hz, 1H), 8.57 (dd,  $J$  = 8.8, 1.6 Hz, 1H), 7.60 (d,  $J$  = 8.4 Hz, 1H), 7.59 (dd,  $J$  = 8.8, 4.0 Hz, 1H), 3.78 (s, 2H), 1.54 (s, 6H).

$^{13}\text{C}$  NMR ( $\text{CDCl}_3$ , 100 MHz):  $\delta$  = 173.6, 149.0, 139.4, 133.6, 127.3, 126.1, 124.7, 122.5, 116.6, 52.9, 46.0, 23.8.

HRMS (ESI)  $m/z$  calc. for  $\text{C}_{14}\text{H}_{15}\text{Cl}_2\text{N}_2\text{O}$   $[\text{M}+\text{H}]^+$  297.0561 found 297.0556.

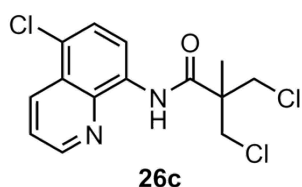

HRMS (ESI)  $m/z$  calc. for  $\text{C}_{14}\text{H}_{14}\text{Cl}_3\text{N}_2\text{O}$   $[\text{M}+\text{H}]^+$  331.0172 found 331.0166.

### General Procedure for the Bromination Reaction

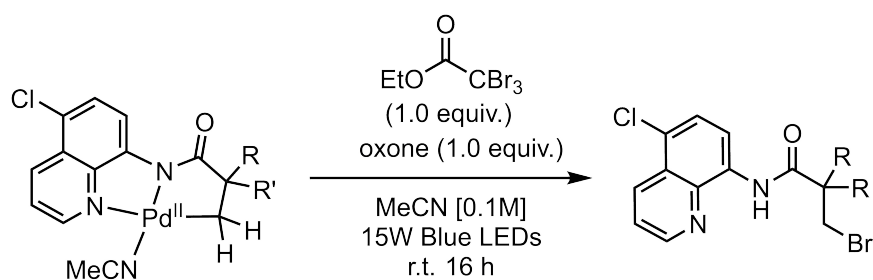

Cyclopalladated complex (0.1 mmol), ethyl tribromoacetate (32.4 mg, 0.1 mmol) and oxone (30.7mg, 0.1 mmol) were placed in a pressure relief sample vial and taken up in MeCN (1ml). The reaction mixture was sparged with  $\text{N}_2$  for 1 minute. The cap was wrapped in parafilm and the reaction mixture was stirred for 16 hours, whilst being irradiated with 15W Blue LEDs at room temperature. The reaction mixture was diluted with  $\text{CH}_2\text{Cl}_2$  and washed with brine. The aqueous layer was re-extracted with  $\text{CH}_2\text{Cl}_2$  (3 $\times$ ) and dried ( $\text{MgSO}_4$ ). The solvent was removed under reduced pressure and the residue

was purified by flash chromatography on deactivated silica, eluting 10-20% EtOAc/hexane.

### Product Characterisation Data

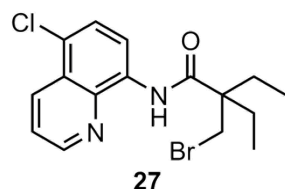

**2-(Bromomethyl)-N-(5-chloroquinolin-8-yl)-2-ethylbutanamide (27):** Obtained as a white solid (22.6 mg, 61%)

$^1\text{H}$  NMR ( $\text{CDCl}_3$ , 400 MHz):  $\delta$  = 10.25 (br s, 1H), 8.88 (dd,  $J$  = 4.2, 1.4 Hz, 1H), 8.74 (d,  $J$  = 8.4 Hz, 1H), 8.58 (dd,  $J$  = 8.5, 1.4 Hz, 1H), 7.60 (d,  $J$  = 8.4 Hz, 1H), overlapping with 7.58 (dd,  $J$  = 8.5, 4.2 Hz, 1H), 3.76 (s, 2H), 2.02 – 1.86 (m, 4H), 0.95 (t,  $J$  = 7.4 Hz, 6H).

$^{13}\text{C}$  NMR ( $\text{CDCl}_3$ , 100 MHz):  $\delta$  = 172.8, 149.0, 139.4, 133.7, 133.5, 127.4, 126.1, 124.6, 122.5, 116.7, 52.2, 37.0, 27.4, 8.6.

HRMS (ESI)  $m/z$  calc. for  $\text{C}_{16}\text{H}_{19}\text{BrClN}_2\text{O}$   $[\text{M}+\text{H}]^+$  369.0369 found 369.0359.

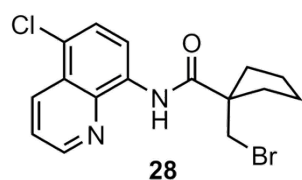

**1-(Bromomethyl)-N-(5-chloroquinolin-8-yl)cyclopentanecarboxamide (28):**

Obtained as a white solid (18.4 mg, 50%)

$^1\text{H}$  NMR ( $\text{CDCl}_3$ , 400 MHz)  $\delta$  = 10.25 (s, 1H), 8.88 (dd,  $J$  = 4.3, 1.6 Hz, 1H), 8.76 (d,  $J$  = 8.4 Hz, 1H), 8.60 (dd,  $J$  = 8.5, 1.6 Hz, 1H), 7.62 (d,  $J$  = 8.4 Hz, 1H), overlapping with 7.59 (dd,  $J$  = 8.5, 4.3 Hz, 1H), 3.77 (s, 2H) 2.44 – 2.29 (m, 2H), 2.04 – 1.77 (m, 6H).

$^{13}\text{C}$  NMR ( $\text{CDCl}_3$ , 100 MHz)  $\delta$  = 173.6, 148.90 139.3, 133.8, 133.7, 127.5, 126.1, 125.0, 124.6, 122.5, 116.8, 57.6, 40.3, 36.0, 25.1.

HRMS (ESI)  $m/z$  calc. for  $\text{C}_{16}\text{H}_{17}\text{BrClN}_2\text{O}$   $[\text{M}+\text{H}]^+$  367.0213 found 367.0211.

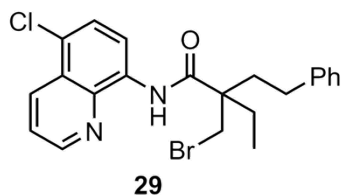

**2-(Bromomethyl)-N-(5-chloroquinolin-8-yl)-2-ethyl-4-phenylbutanamide (29):**

Obtained as a white solid (22.2 mg, 50%)

$^1\text{H}$  NMR ( $\text{CDCl}_3$ , 400 MHz):  $\delta$  = 10.31 (s, 1H), 8.88 (dd,  $J$  = 4.2, 1.2 Hz, 1H), 8.74 (d,  $J$  = 8.4 Hz, 1H), 8.60 (dd,  $J$  = 8.5, 1.3 Hz, 1H), 7.63 (d,  $J$  = 8.4 Hz, 1H), overlapping with 7.58 (dd,  $J$  = 8.5, 4.2 Hz, 1H), 7.35 – 7.04 (m, 5H), 3.85 (q,  $J$  = 12.7 Hz, 2H) 2.73 – 2.54 (m, 2H), 2.26 (td,  $J$  = 13.1, 12.2, 5.4 Hz, 1H), 2.73-2.54 (m, 3H), 1.00 (t,  $J$  = 7.4 Hz, 3H).

$^{13}\text{C}$  NMR ( $\text{CDCl}_3$ , 100 MHz):  $\delta$  = 172.4, 149.0, 141.4, 139.4, 133.7, 133.4, 128.6, 127.4, 126.2, 124.8, 122.6, 116.7, 51.8, 37.5, 37.0, 30.8, 28.1, 8.5.

HRMS (ESI)  $m/z$  calc. for  $\text{C}_{22}\text{H}_{22}\text{BrClN}_2\text{O}$   $[\text{M}]^+$  444.0604 found 444.0601.

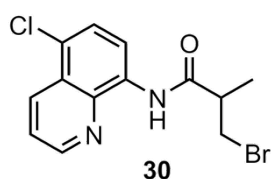

**3-Bromo-N-(5-chloroquinolin-8-yl)-2-methylpropanamide (30):** Obtained as a white solid (15.98 mg, 48%)

$^1\text{H}$  NMR ( $\text{CDCl}_3$ , 400 MHz):  $\delta$  = 10.00 (s, 1H), 8.88 (dd,  $J$  = 4.3, 1.6 Hz, 1H), 8.77 (d,  $J$  = 8.4 Hz, 1H), 8.63 (dd,  $J$  = 8.5, 1.6 Hz, 1H), 7.68 – 7.53 (m, 2H), 3.77 (dd,  $J$  = 10.0, 7.8 Hz, 1H), 3.54 (dd,  $J$  = 10.0, 5.8 Hz, 1H), 3.10 (dq,  $J$  = 13.9, 7.0 Hz, 1H), 1.47 (d,  $J$  = 6.9 Hz, 3H).

$^{13}\text{C}$  NMR ( $\text{CDCl}_3$ , 100 MHz):  $\delta$  = 172.1, 148.6, 138.7, 134.2, 133.4, 127.6, 126.2, 125.0, 122.5, 117.4, 45.5, 34.5, 17.6.

HRMS (ESI)  $m/z$  calc. for  $\text{C}_{13}\text{H}_{13}\text{BrClN}_2\text{O}$   $[\text{M}+\text{H}]^+$  326.9900 found 326.9895.



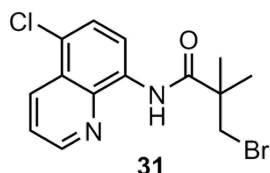

**3-Bromo-N-(5-chloroquinolin-8-yl)-2,2-dimethylpropanamide (31):** Obtained as a white solid (18.76 mg, 55%)

$^1\text{H}$  NMR ( $\text{CDCl}_3$ , 400 MHz):  $\delta$  = 10.28 (br s, 1H), 8.87 (dd,  $J$  = 4.2, 1.5 Hz, 1H), 8.75 (d,  $J$  = 8.4 Hz, 1H), 8.58 (dd,  $J$  = 8.5, 1.5 Hz, 1H), 7.64 – 7.54 (m, 2H), 3.68 (s, 2H), 1.58 (s, 6H).

$^{13}\text{C}$  NMR ( $\text{CDCl}_3$ , 100 MHz):  $\delta$  = 173.5, 148.9, 139.4, 133.7, 133.5, 127.4, 126.11, 124.8, 122.5, 116.7, 45.5, 42.3, 38.4, 24.7.

HRMS (ESI)  $m/z$  calc. for  $\text{C}_{14}\text{H}_{15}\text{BrClN}_2\text{O}$   $[\text{M}+\text{H}]^+$  341.0056 found 341.0054.

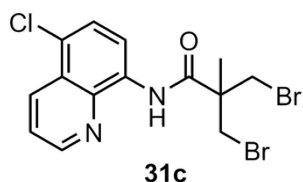

HRMS (ESI)  $m/z$  calc. for  $\text{C}_{14}\text{H}_{14}\text{Br}_2\text{ClN}_2\text{O}$   $[\text{M}+\text{H}]^+$  418.9161 found 418.9159.

### General Procedure for the Removal of Aminoquinoline Directing Group<sup>18]</sup>

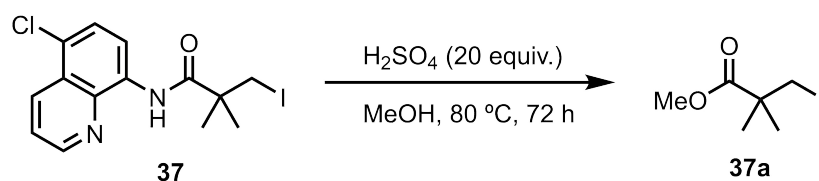

3-Iodo-N-(5-chloroquinolin-8-yl)-2,2-dimethylpropanamide (0.15 mmol) and concentrated sulfuric acid (3 mmol, 20 equiv.) were added to a sample vial and taken up in MeOH (1.5 ml). The vial was sealed and heated at 80 °C for 72 hours. After cooling to room temperature, the reaction mixture was diluted with  $\text{CH}_2\text{Cl}_2$  and washed with brine. The aqueous layer was extracted with  $\text{CH}_2\text{Cl}_2$  (3 $\times$ ) and the combined organic extracts dried ( $\text{MgSO}_4$ ). The solvent was removed under reduced pressure and the residue was purified by flash chromatography on silica, eluting with 15% EtOAc/hexane.

## Product Characterisation Data

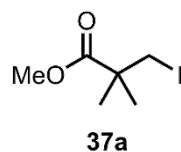

**3-Iodo-2,2-dimethylpropionate methyl ester (37a):** Obtained as a transparent oil (15 mg, 42%)

$^1\text{H}$  NMR (400 MHz,  $\text{CDCl}_3$ )  $\delta$  3.72 (s, 3H), 3.34 (s, 2H), 1.33 (s, 6H).

$^{13}\text{C}$  NMR (100 MHz,  $\text{CDCl}_3$ )  $\delta$  175.2, 52.5, 43.6, 25.68, 16.5.

Starting material **37** was also recovered in 58% yield.

## References

- [1] W.-H. Rao, B.-B. Zhan, K. Chen, P.-X. Ling, Z.-Z. Zhang, B.-F. Shi, *Org. Lett.* **2015**, *17*, 3552-3555.
- [2] E. Kerr, E. H. Doeven, G. J. Barbante, C. F. Hogan, D. J. Hayne, P. S. Donnelly, P. S. Francis, *Chem. Sci.* **2016**, *7*, 5271-5279.
- [3] N. G. Connelly, W. E. Geiger, *Chem. Rev.* **1996**, *96*, 877-910.
- [4] P. T. Kissinger, W. R. Heineman, *J. Chem. Educ.* **1983**, *60*, 702.
- [5] M. J. G. R. Frisch, G. Trucks, H. B. Schlegel, G. E. Scuseria, M. Robb, J. Cheeseman, G. Scalmani, V. Barone, B. Mennucci, G. A. Petersson, H. Nakatsuji, M. Caricato, X. Li, H. P. Hratchian, A. F. Izmaylov, J. Bloino, G. Zheng, J. L. Sonnenberg, M. Hada, D. Fox, **2010**.
- [6] a) J. P. Perdew, *Phys. Rev. B* **1986**, *33*, 8822-8824; b) A. D. Becke, *Phys. Rev. A* **1988**, *38*, 3098-3100; c) L. Chen, E. H. Doeven, D. J. D. Wilson, E. Kerr, D. J. Hayne, C. F. Hogan, W. Yang, T. T. Pham, P. S. Francis, *ChemElectroChem* **2017**, *4*, 1797-1808.
- [7] B. J. Shields, B. Kudisch, G. D. Scholes, A. G. Doyle, *J. Am. Chem. Soc.* **2018**, *140*, 3035-3039.
- [8] X. Yang, Y. Sun, T.-y. Sun, Y. Rao, *Chem. Commun.* **2016**, *52*, 6423-6426.
- [9] G. Sheldrick, *Acta Cryst C* **2015**, *71*, 3-8.

# $^1\text{H}$ and $^{13}\text{C}$ NMR Spectra

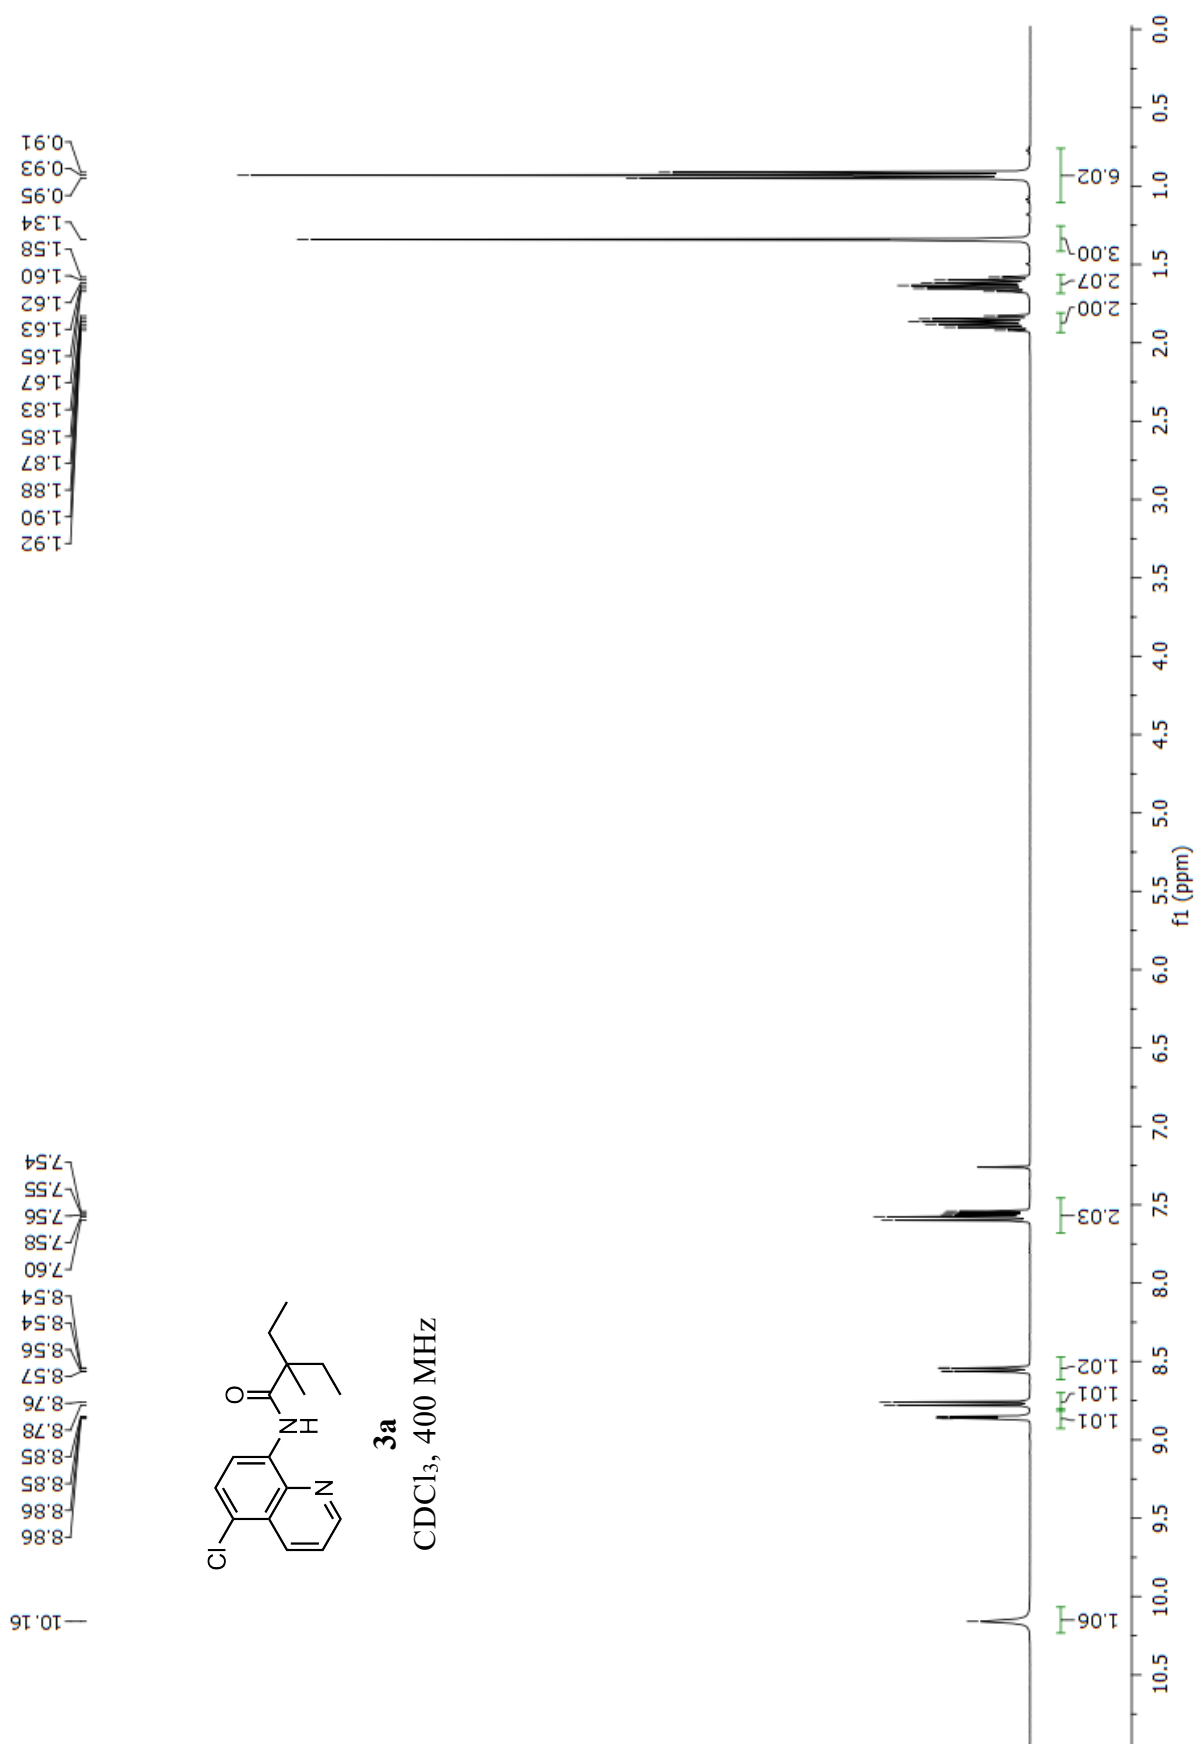

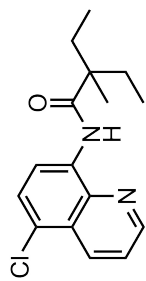

**3a**

CDCl<sub>3</sub>, 100 MHz

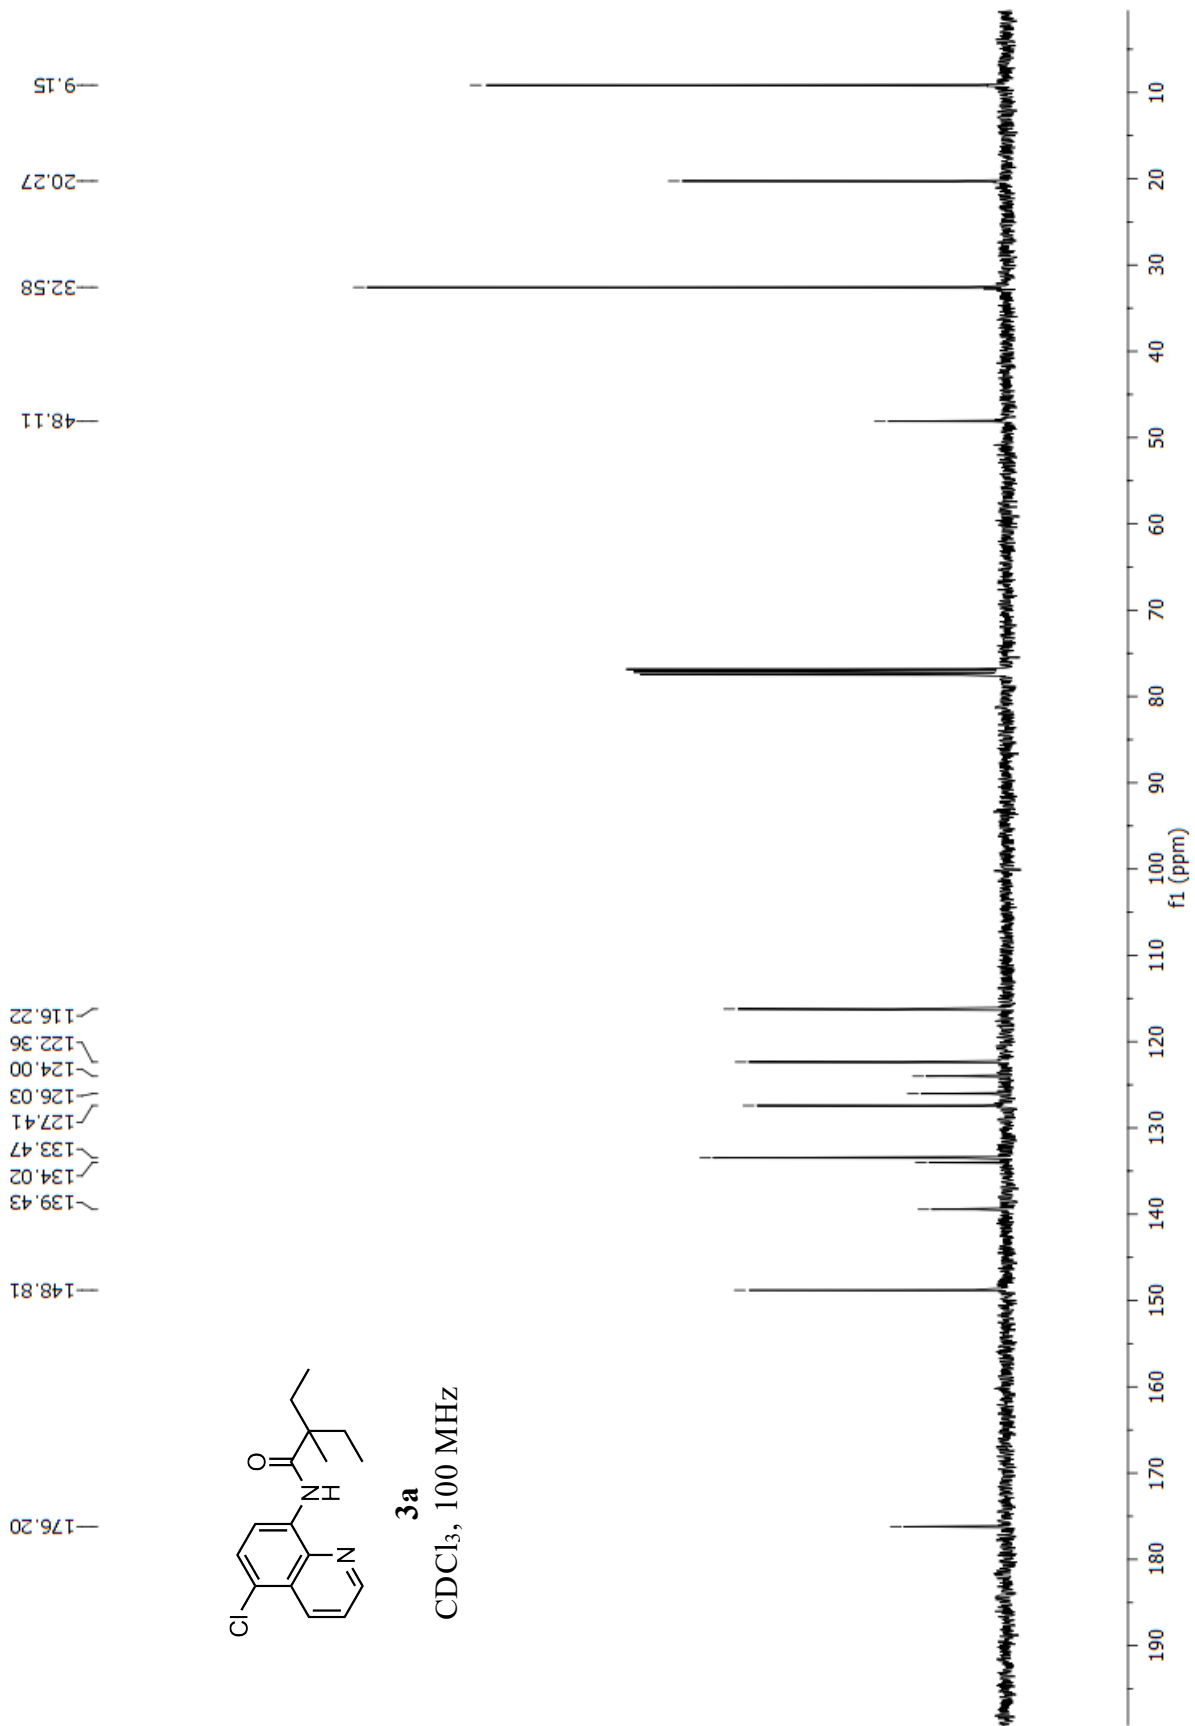

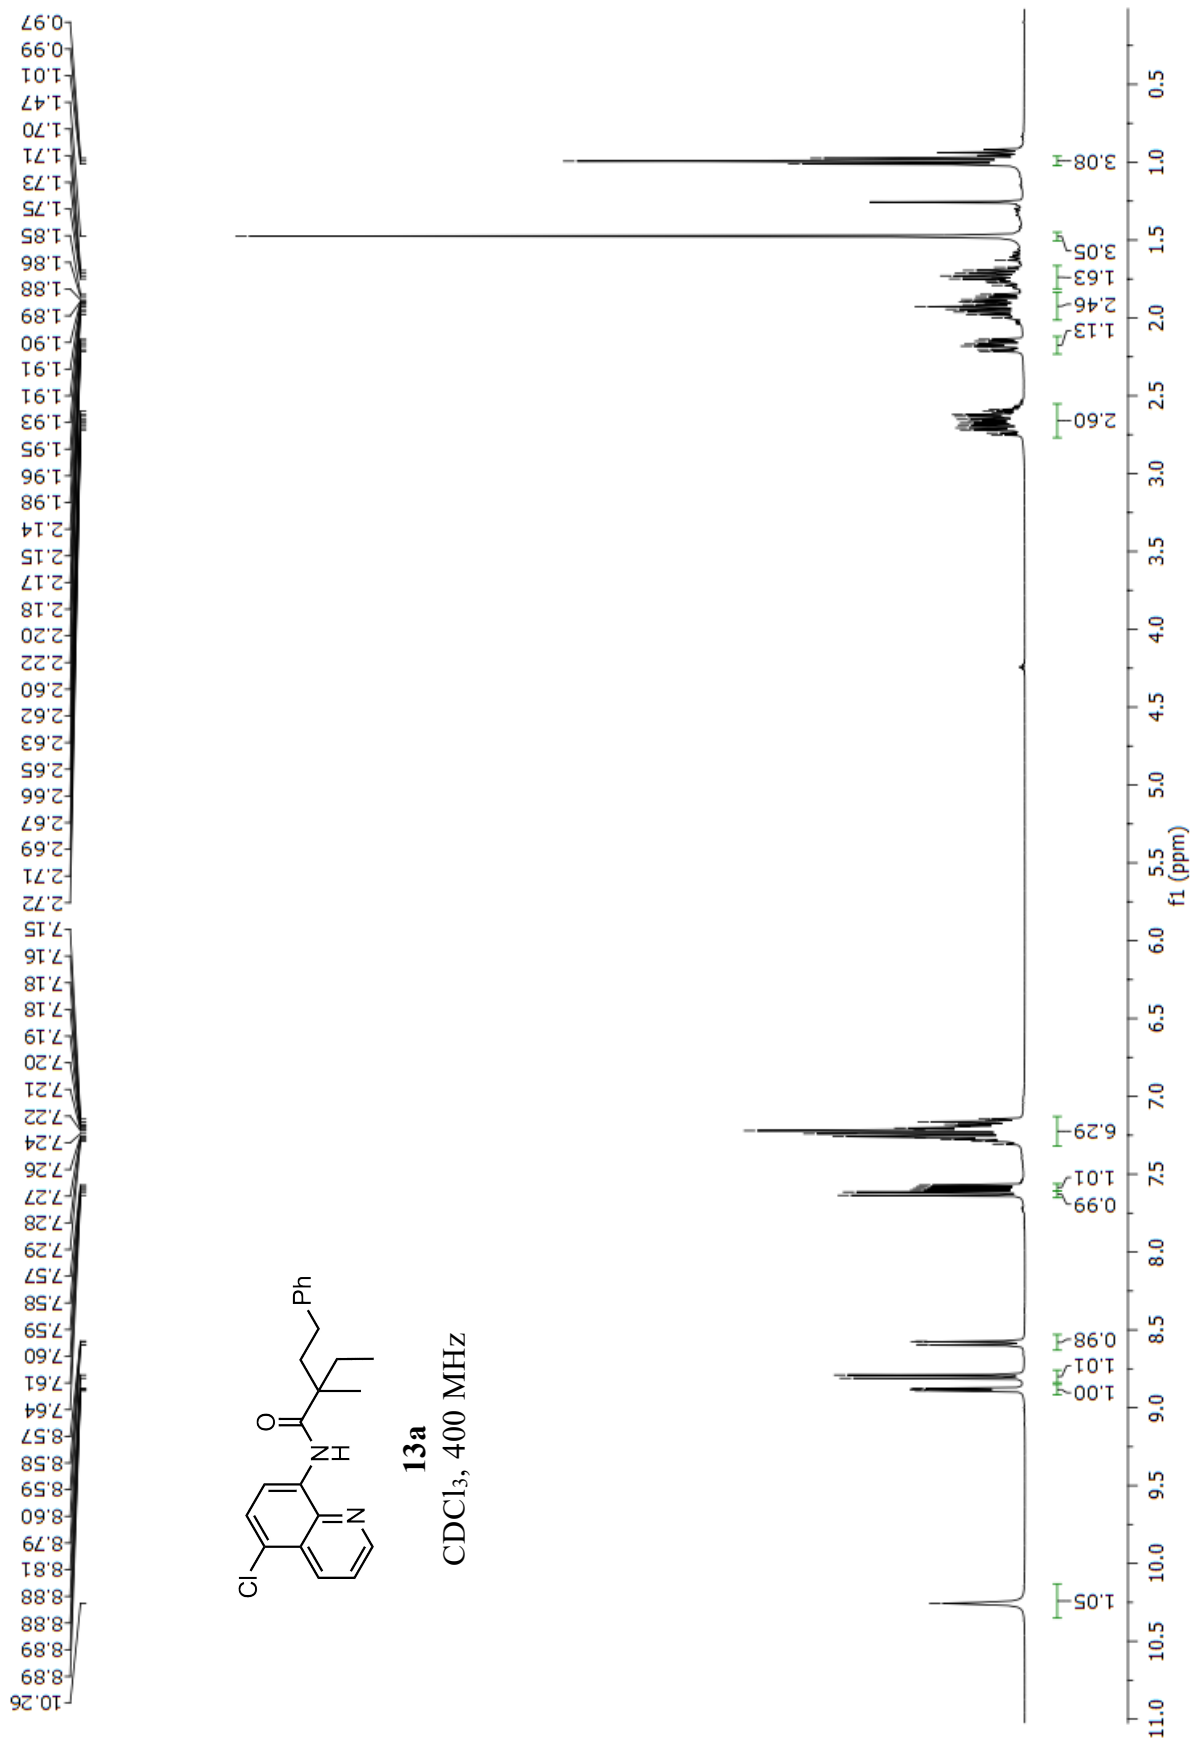

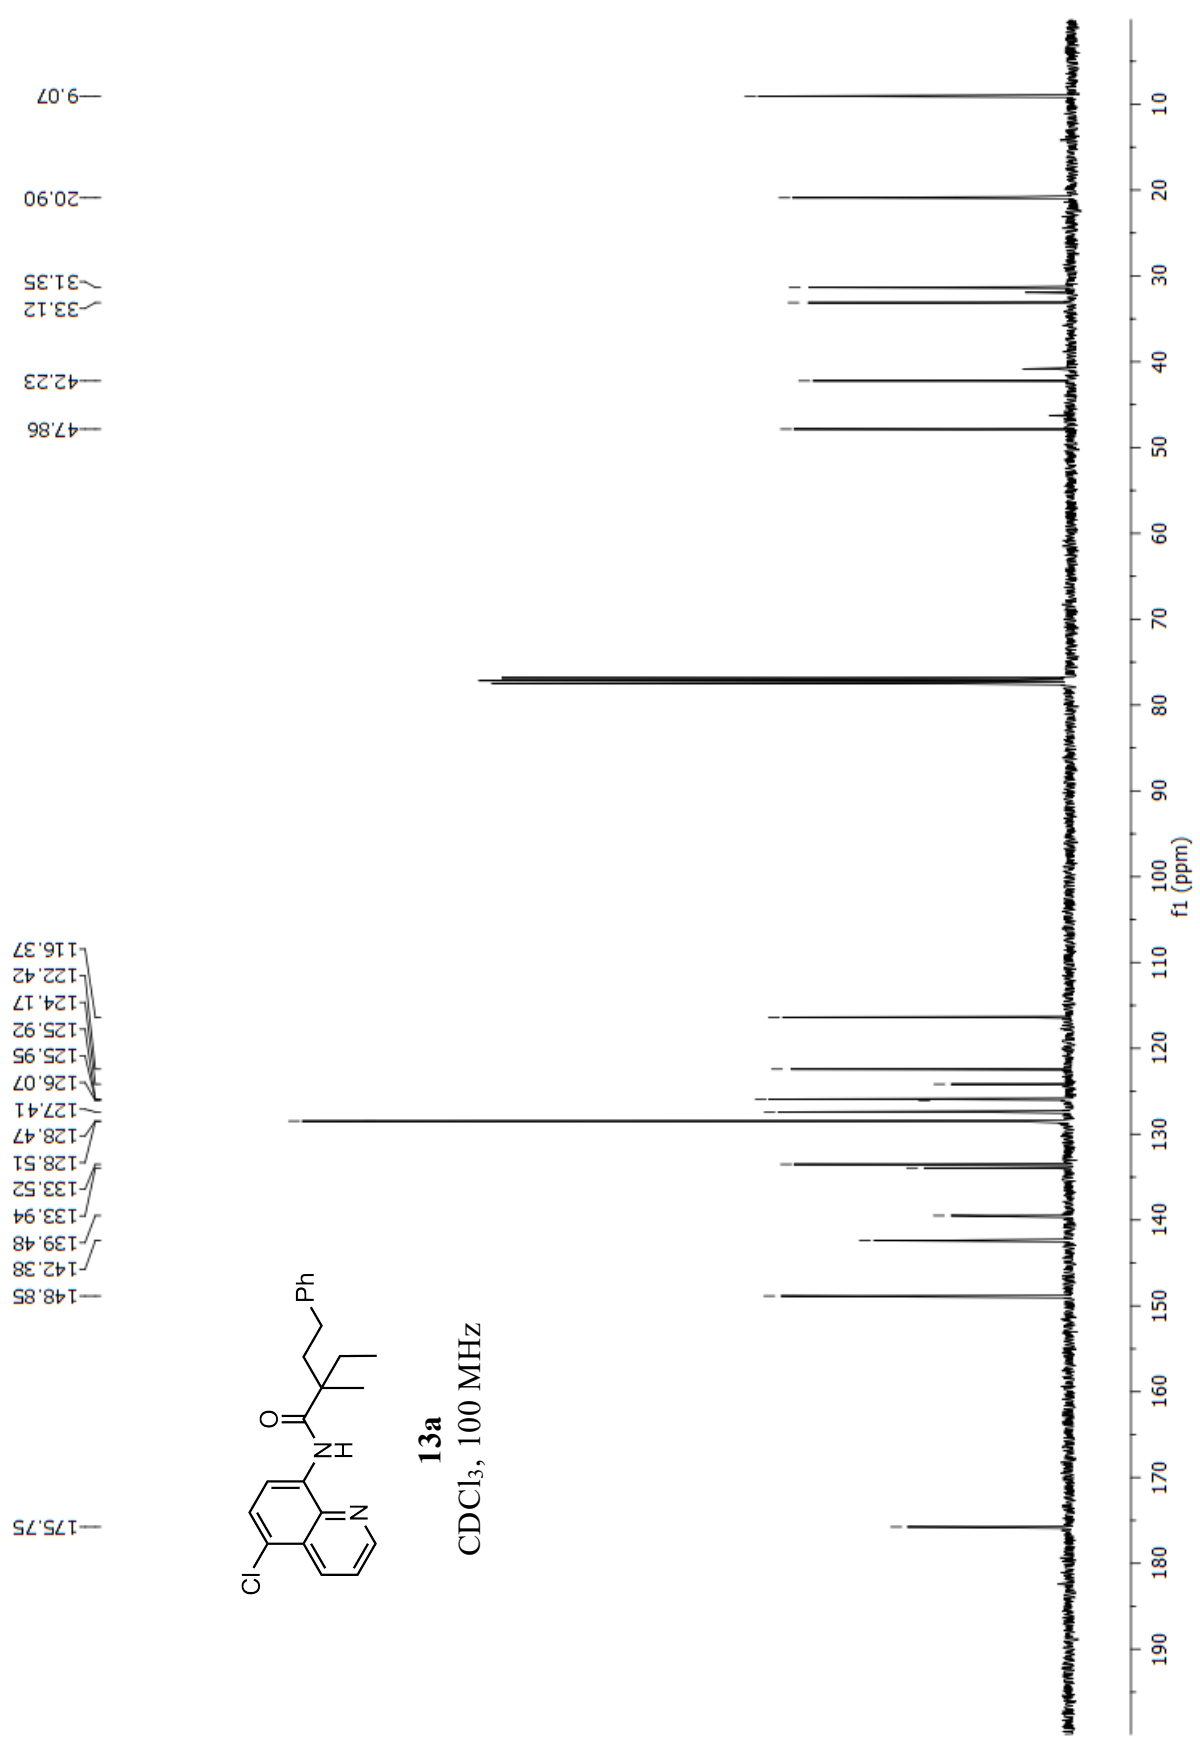

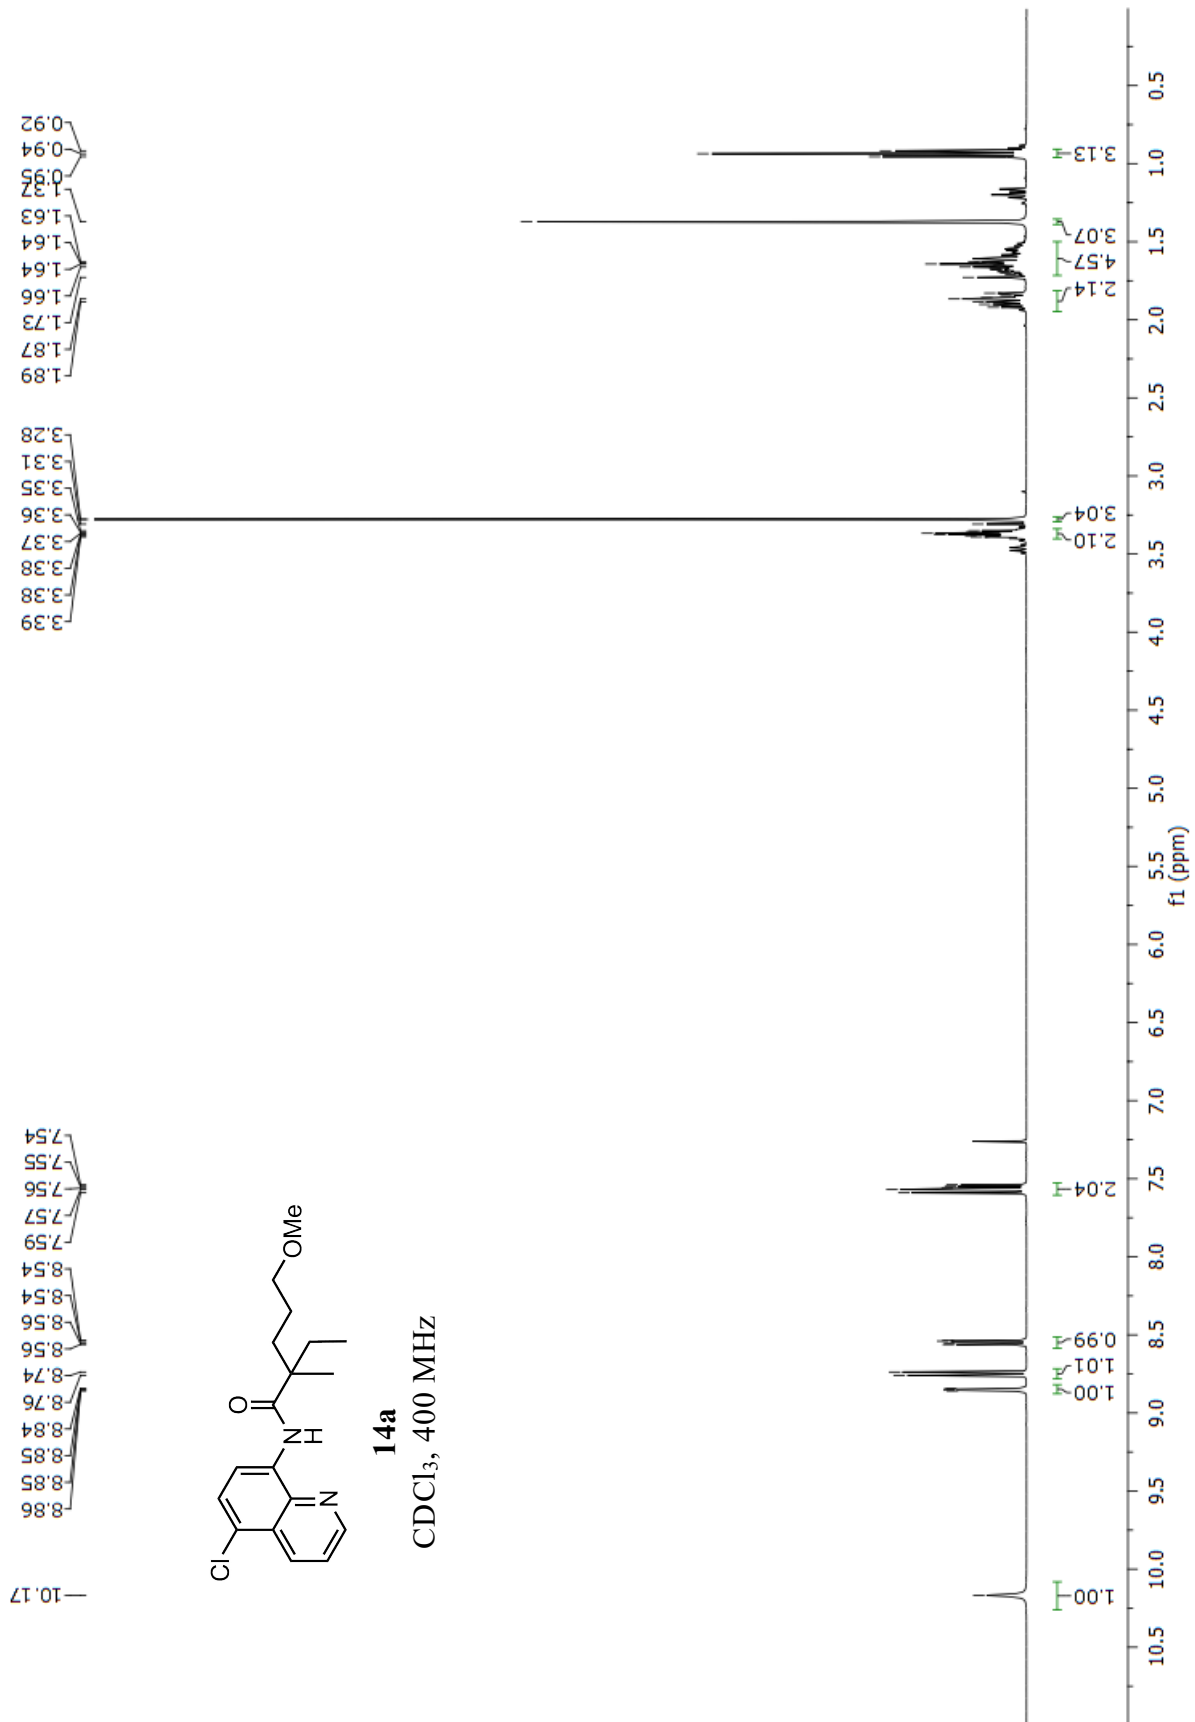

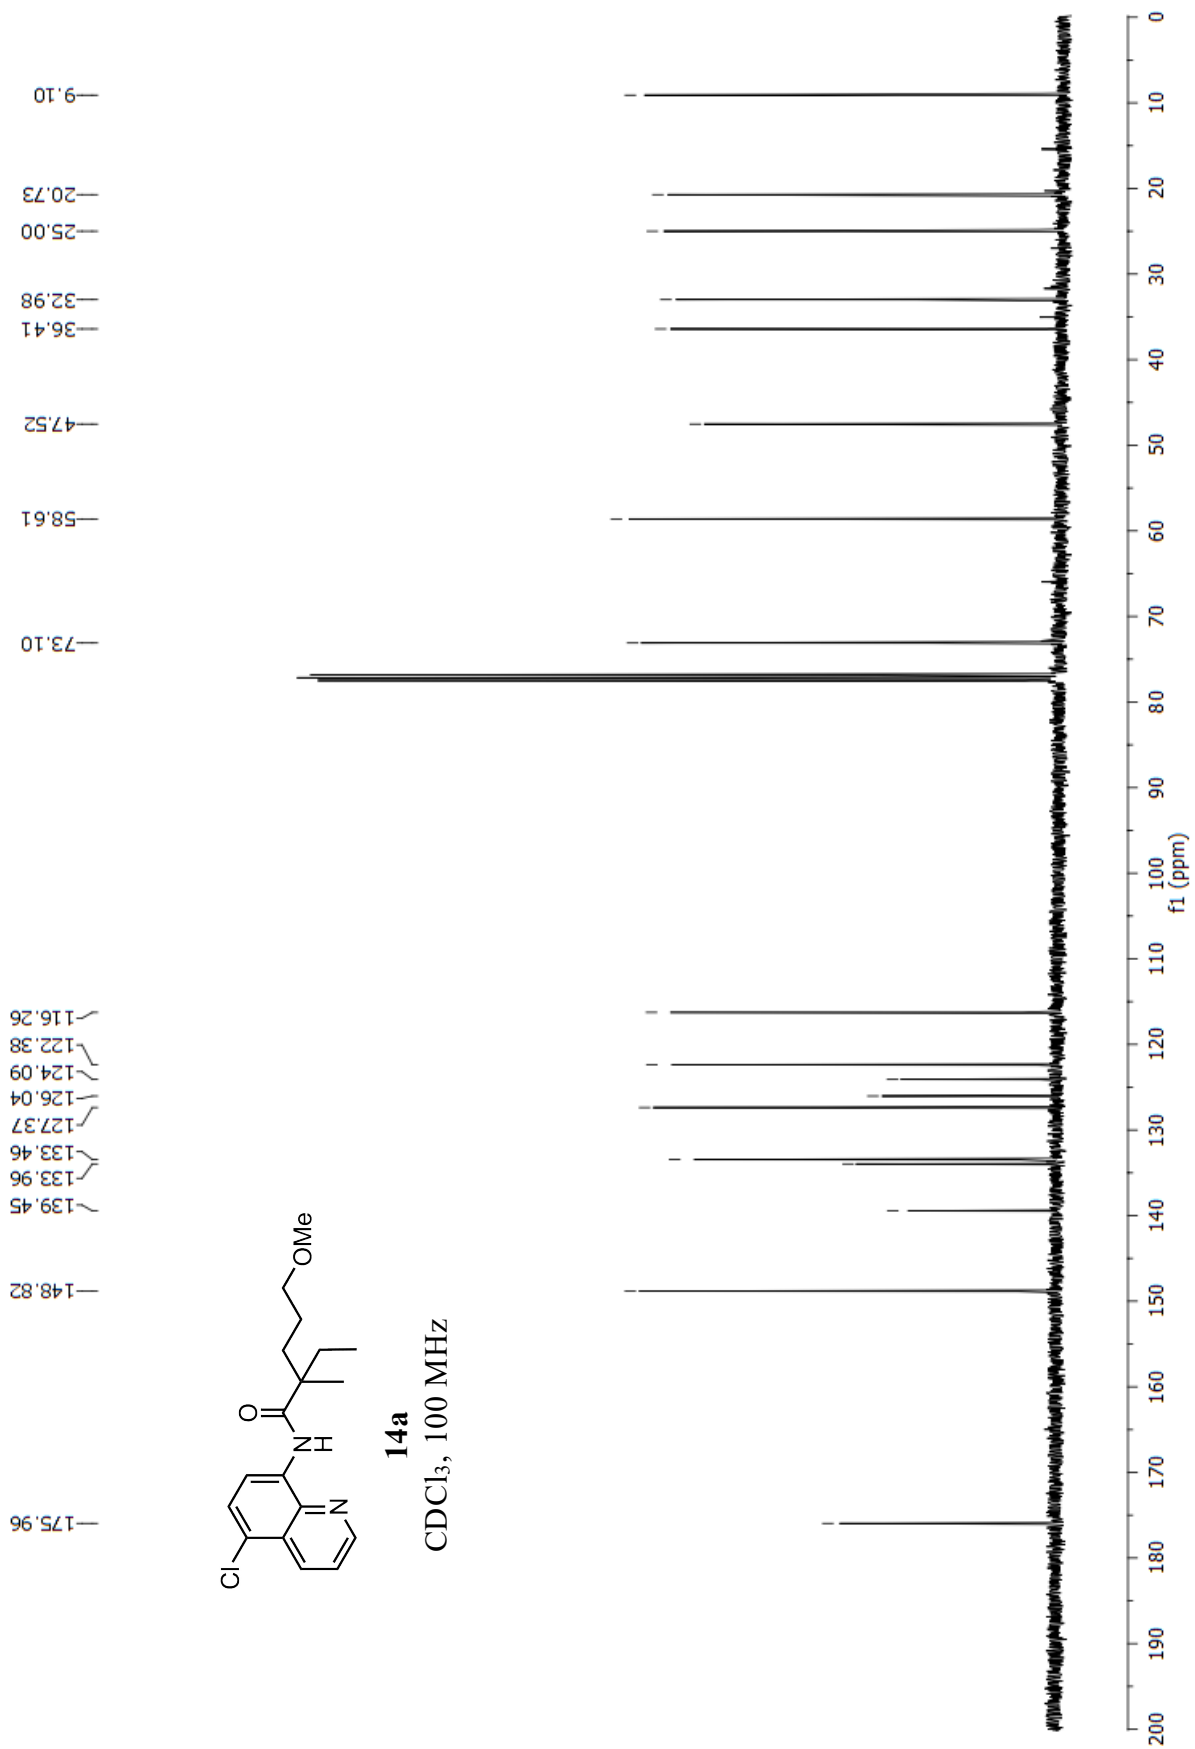



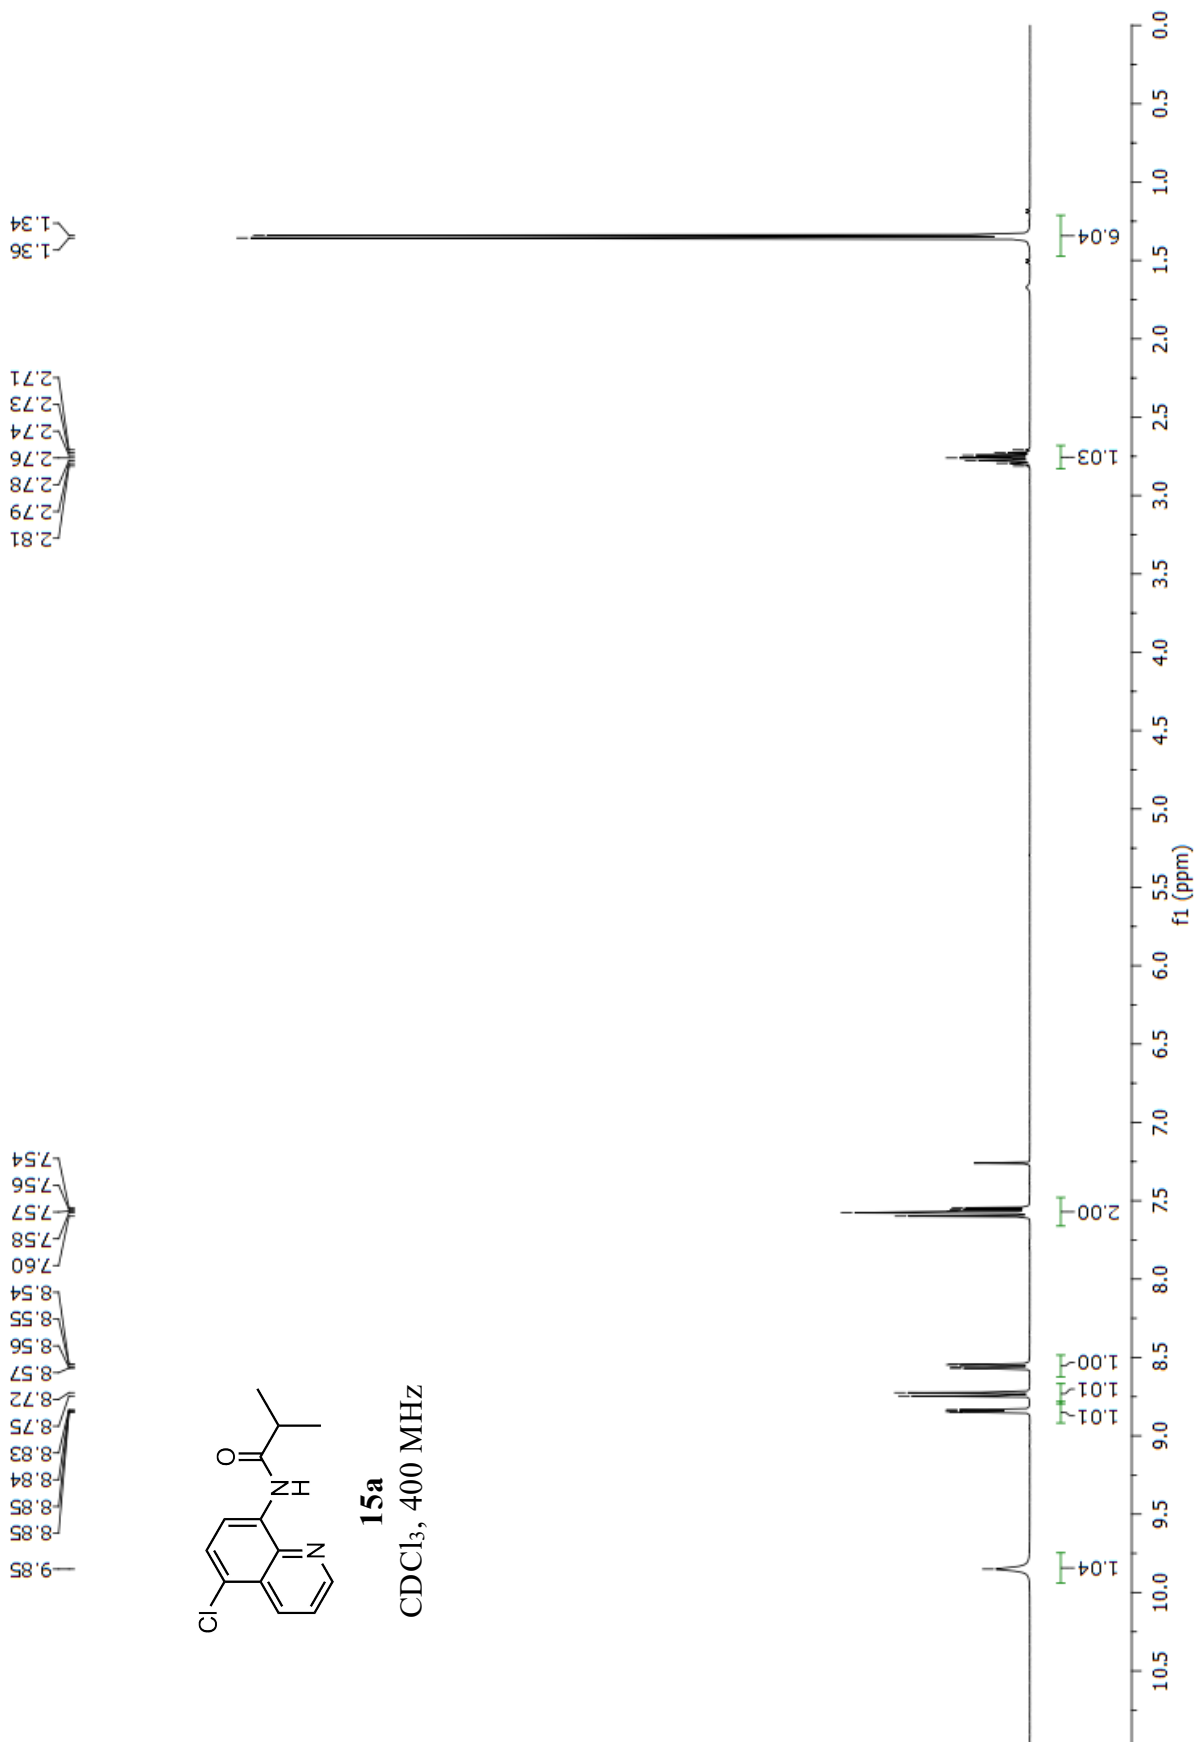

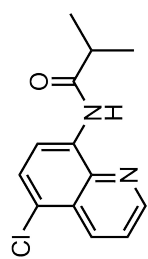

**15a**

CDCl<sub>3</sub>, 100 MHz

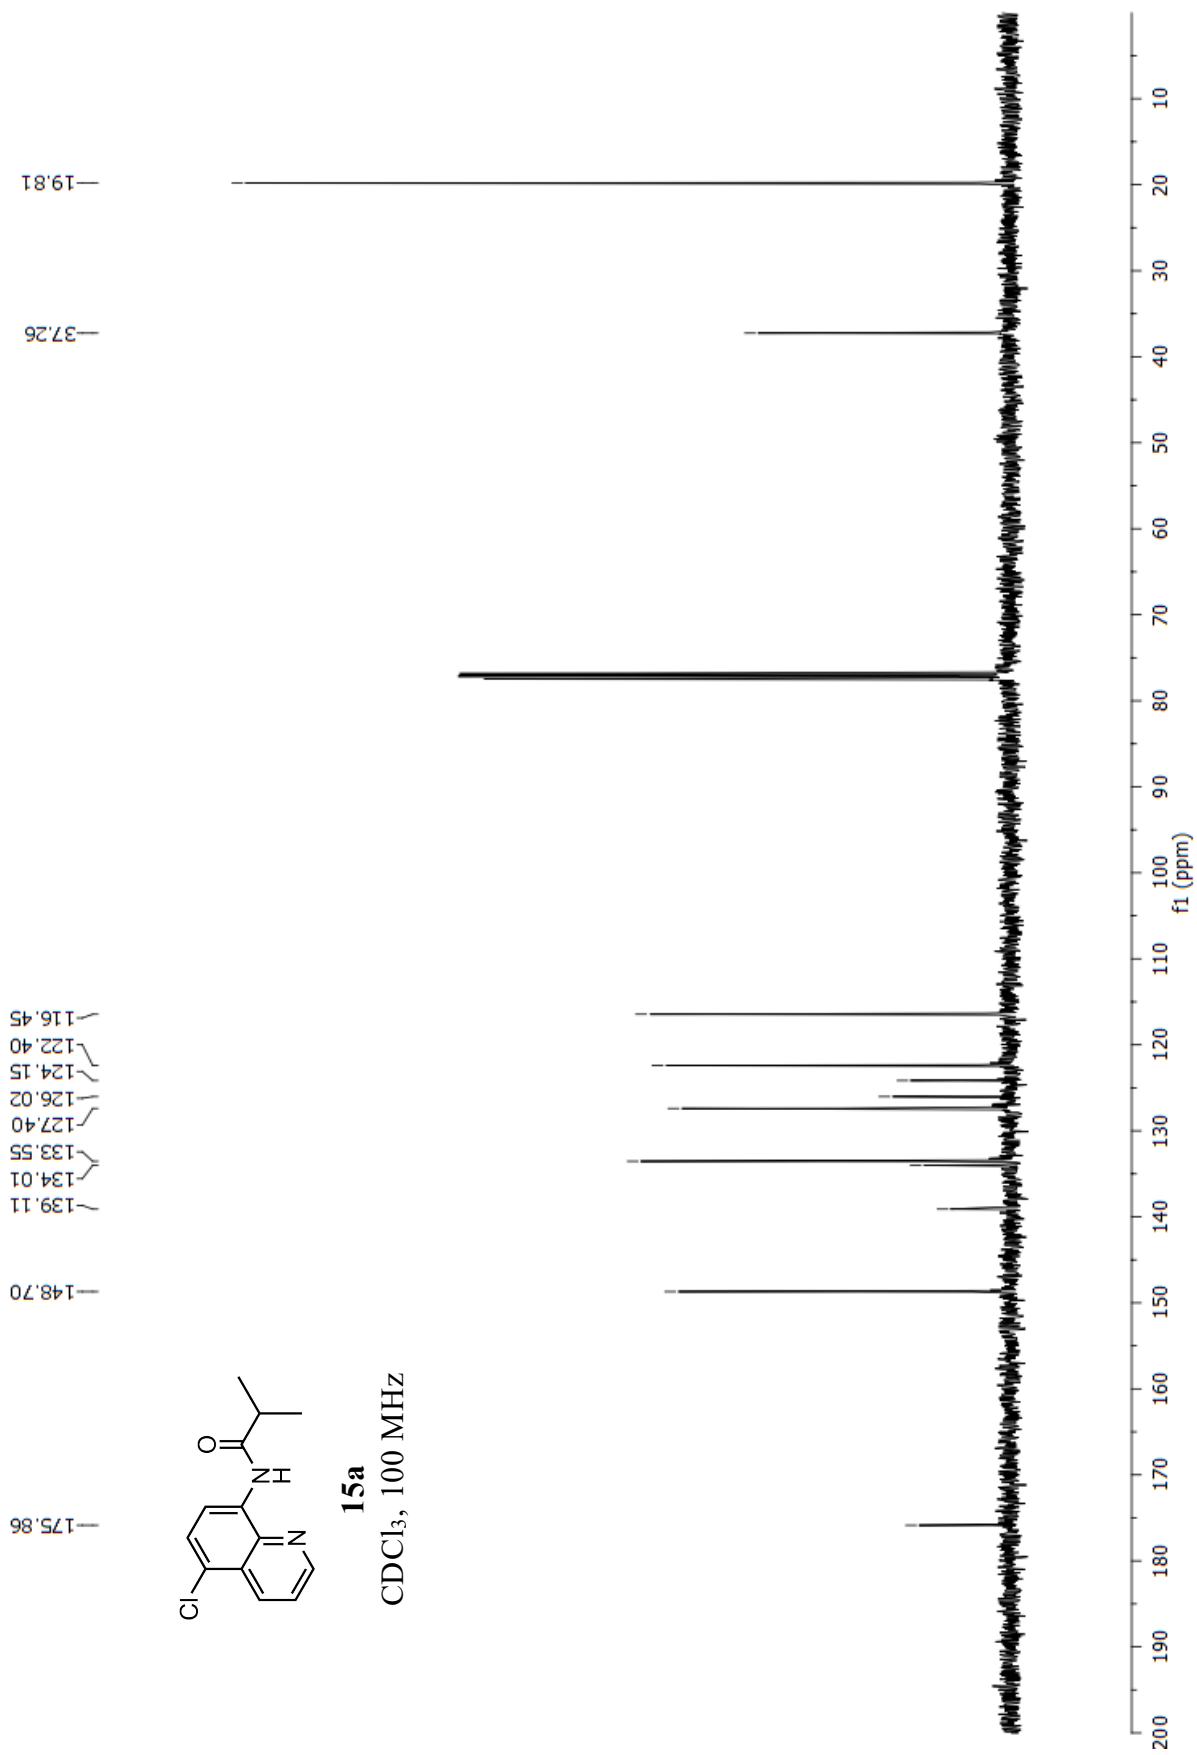

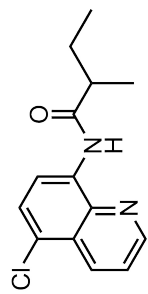

**16a**

CDCl<sub>3</sub>, 400 MHz

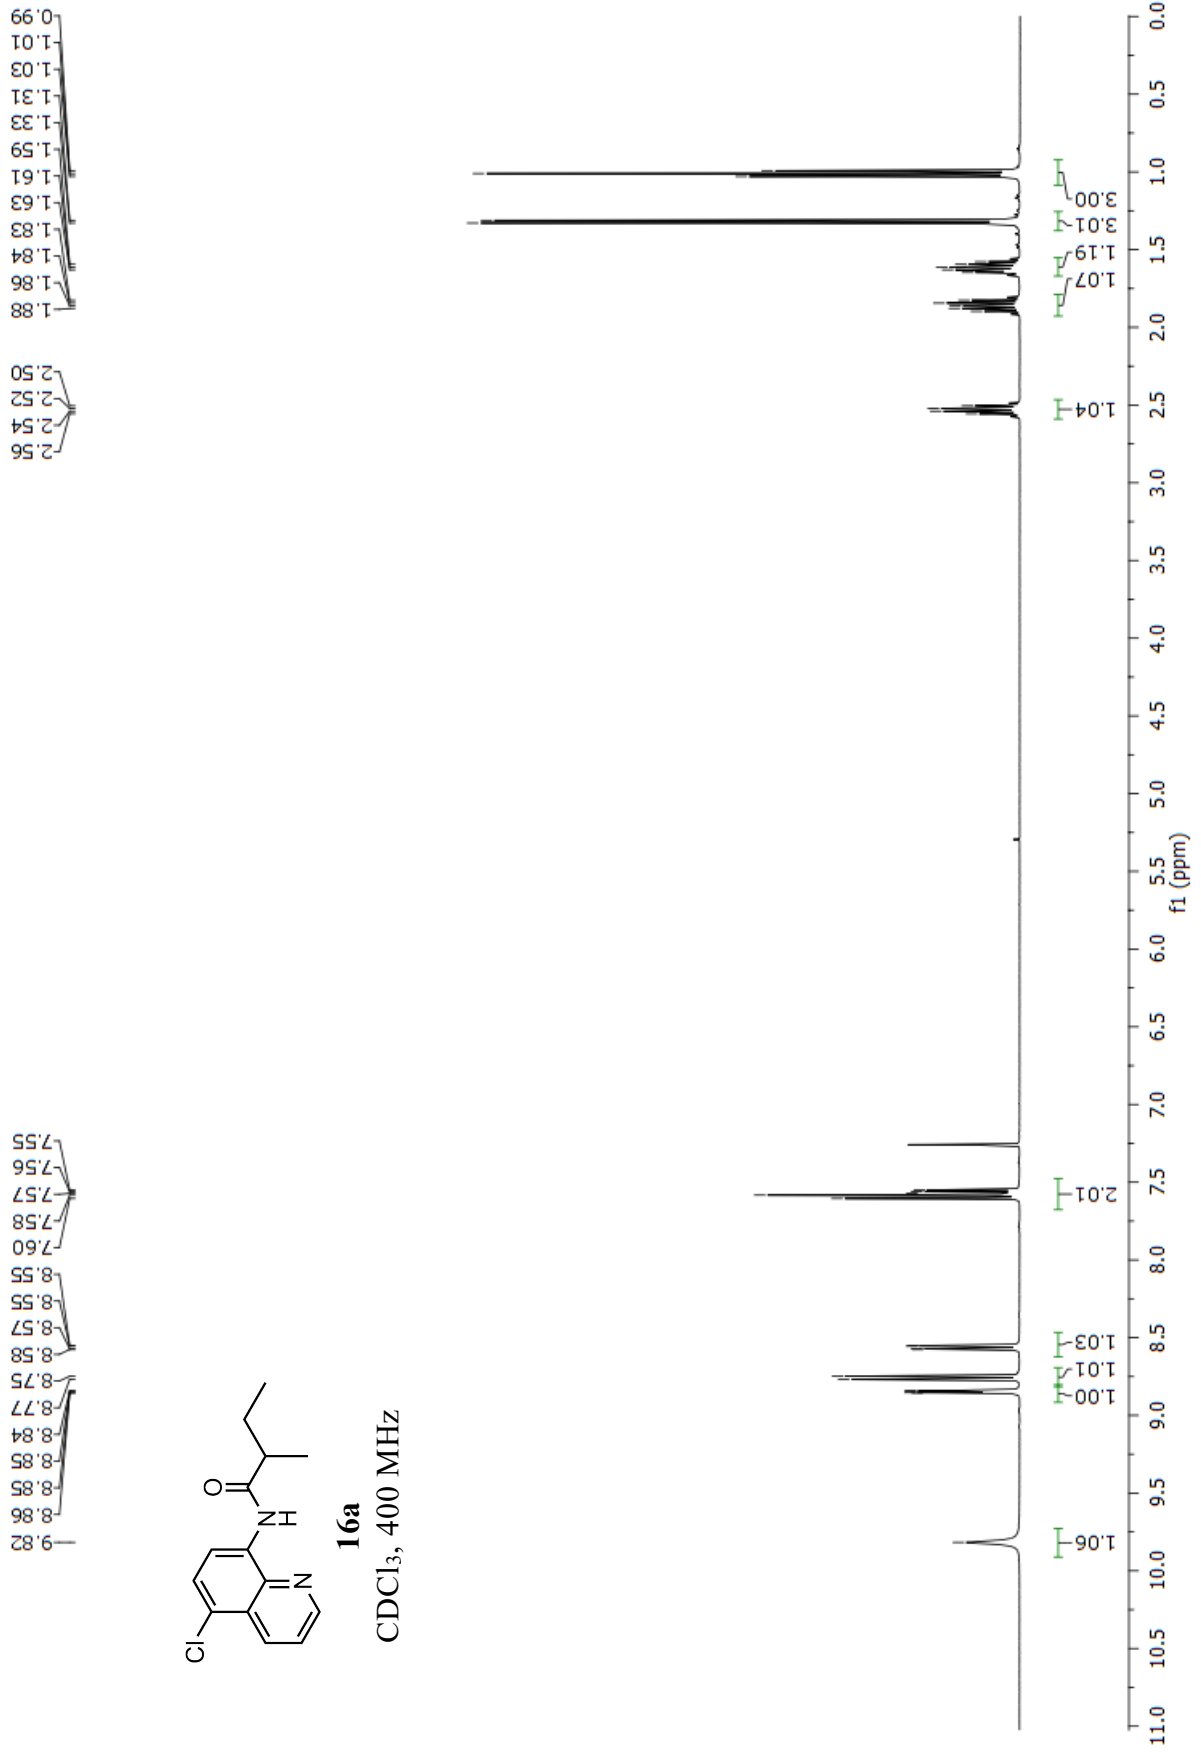

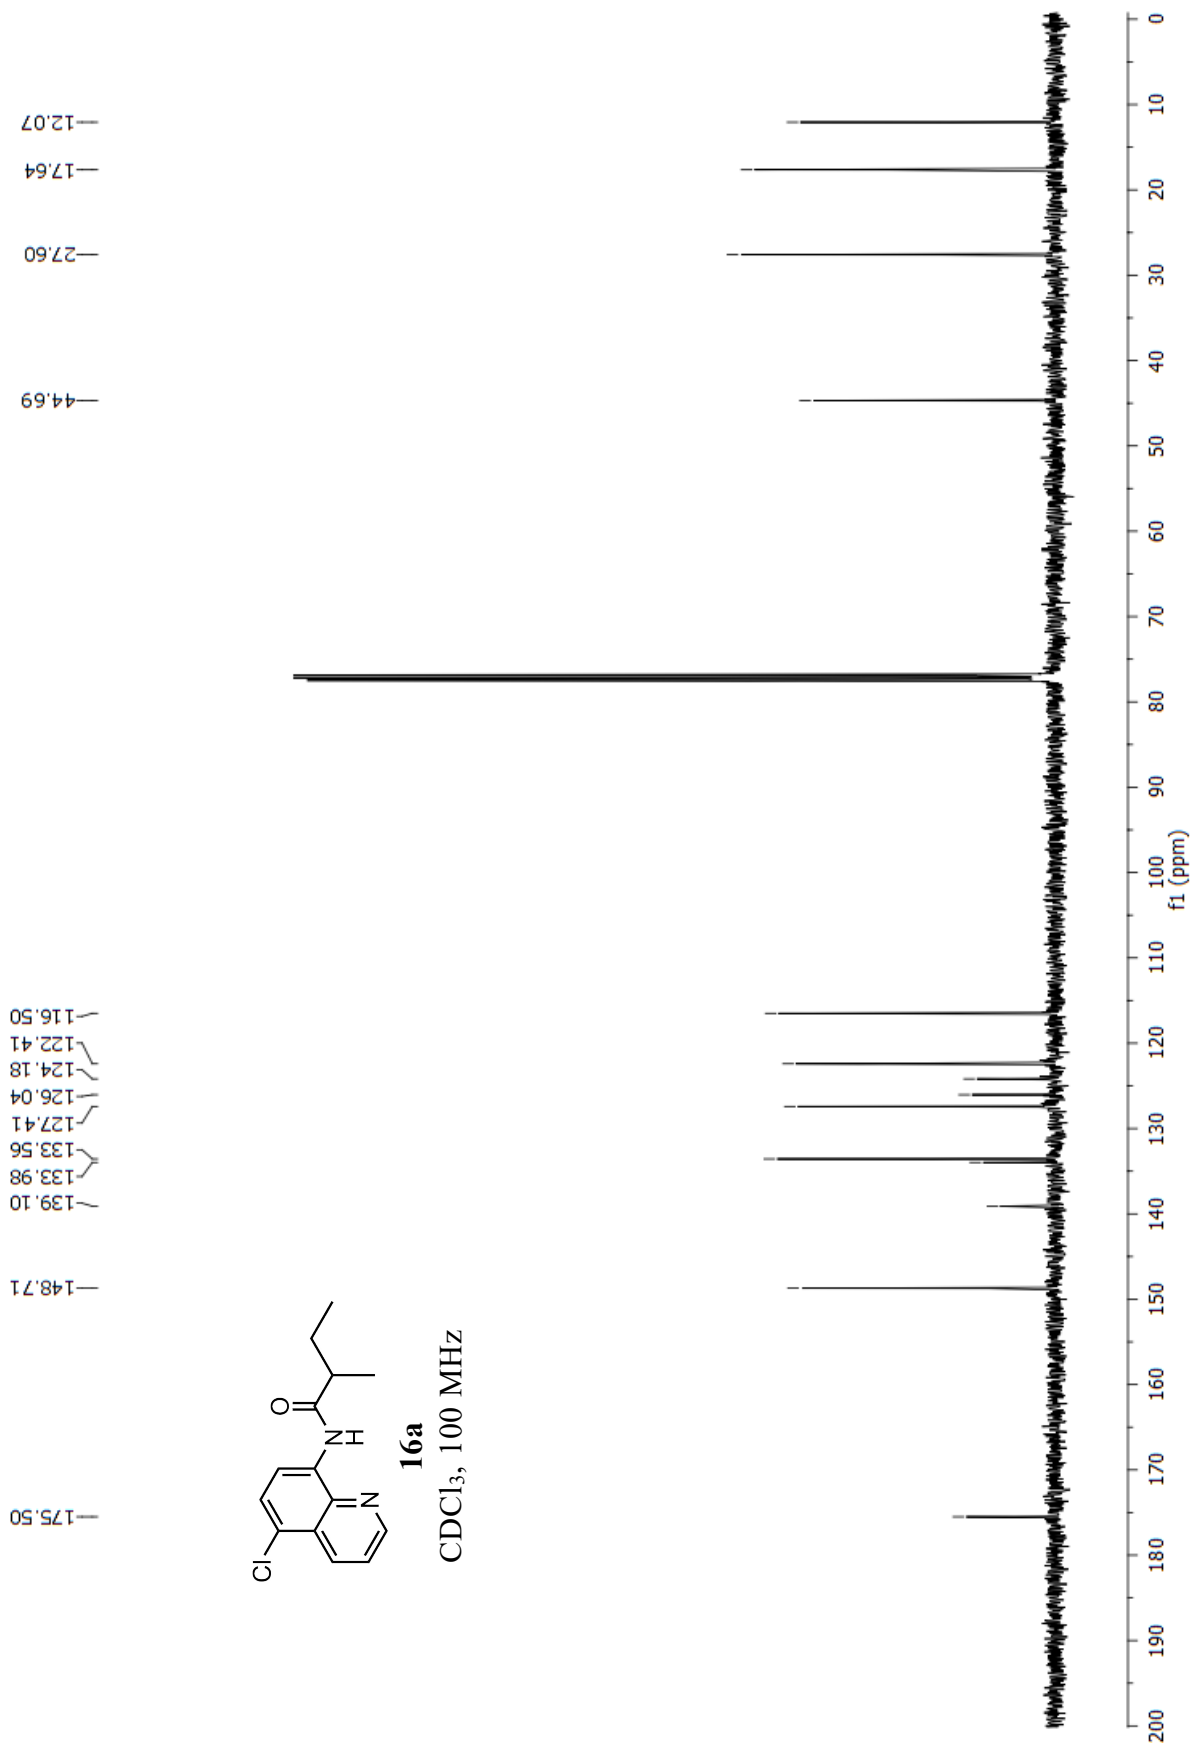

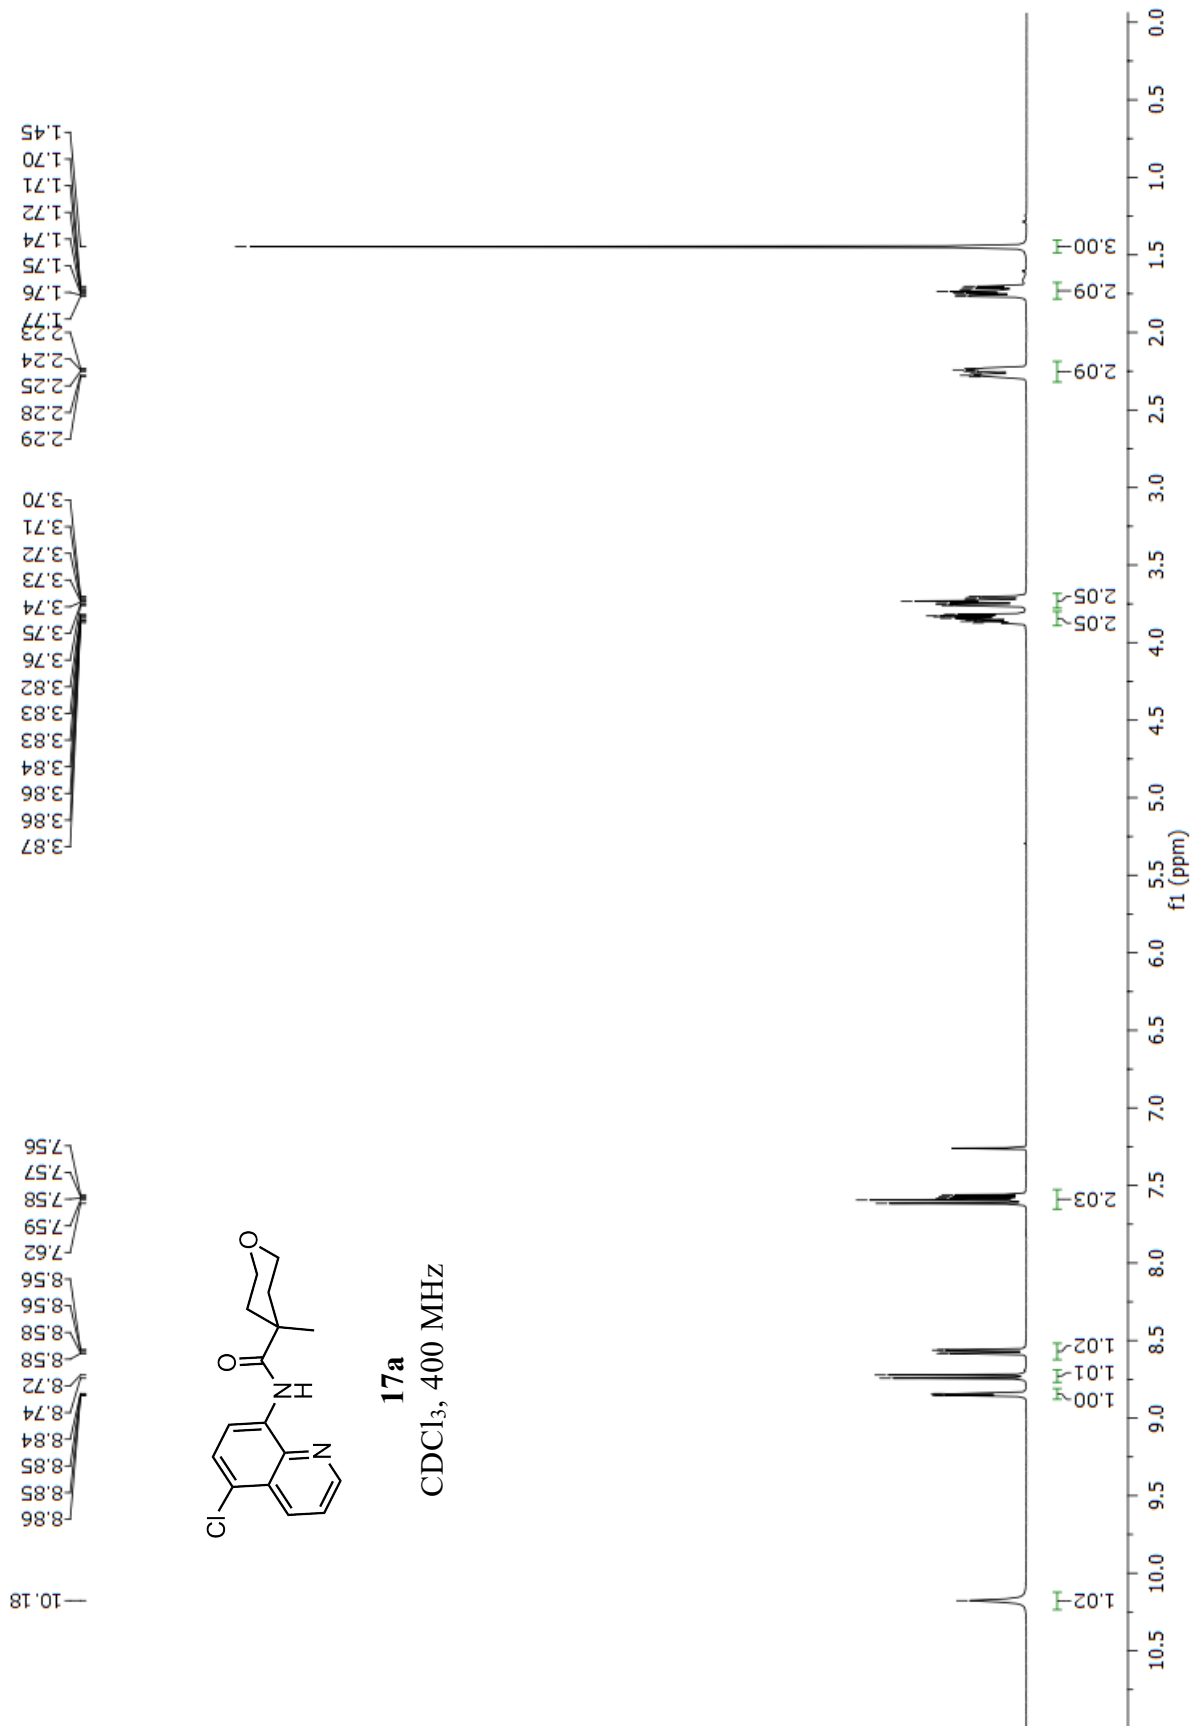

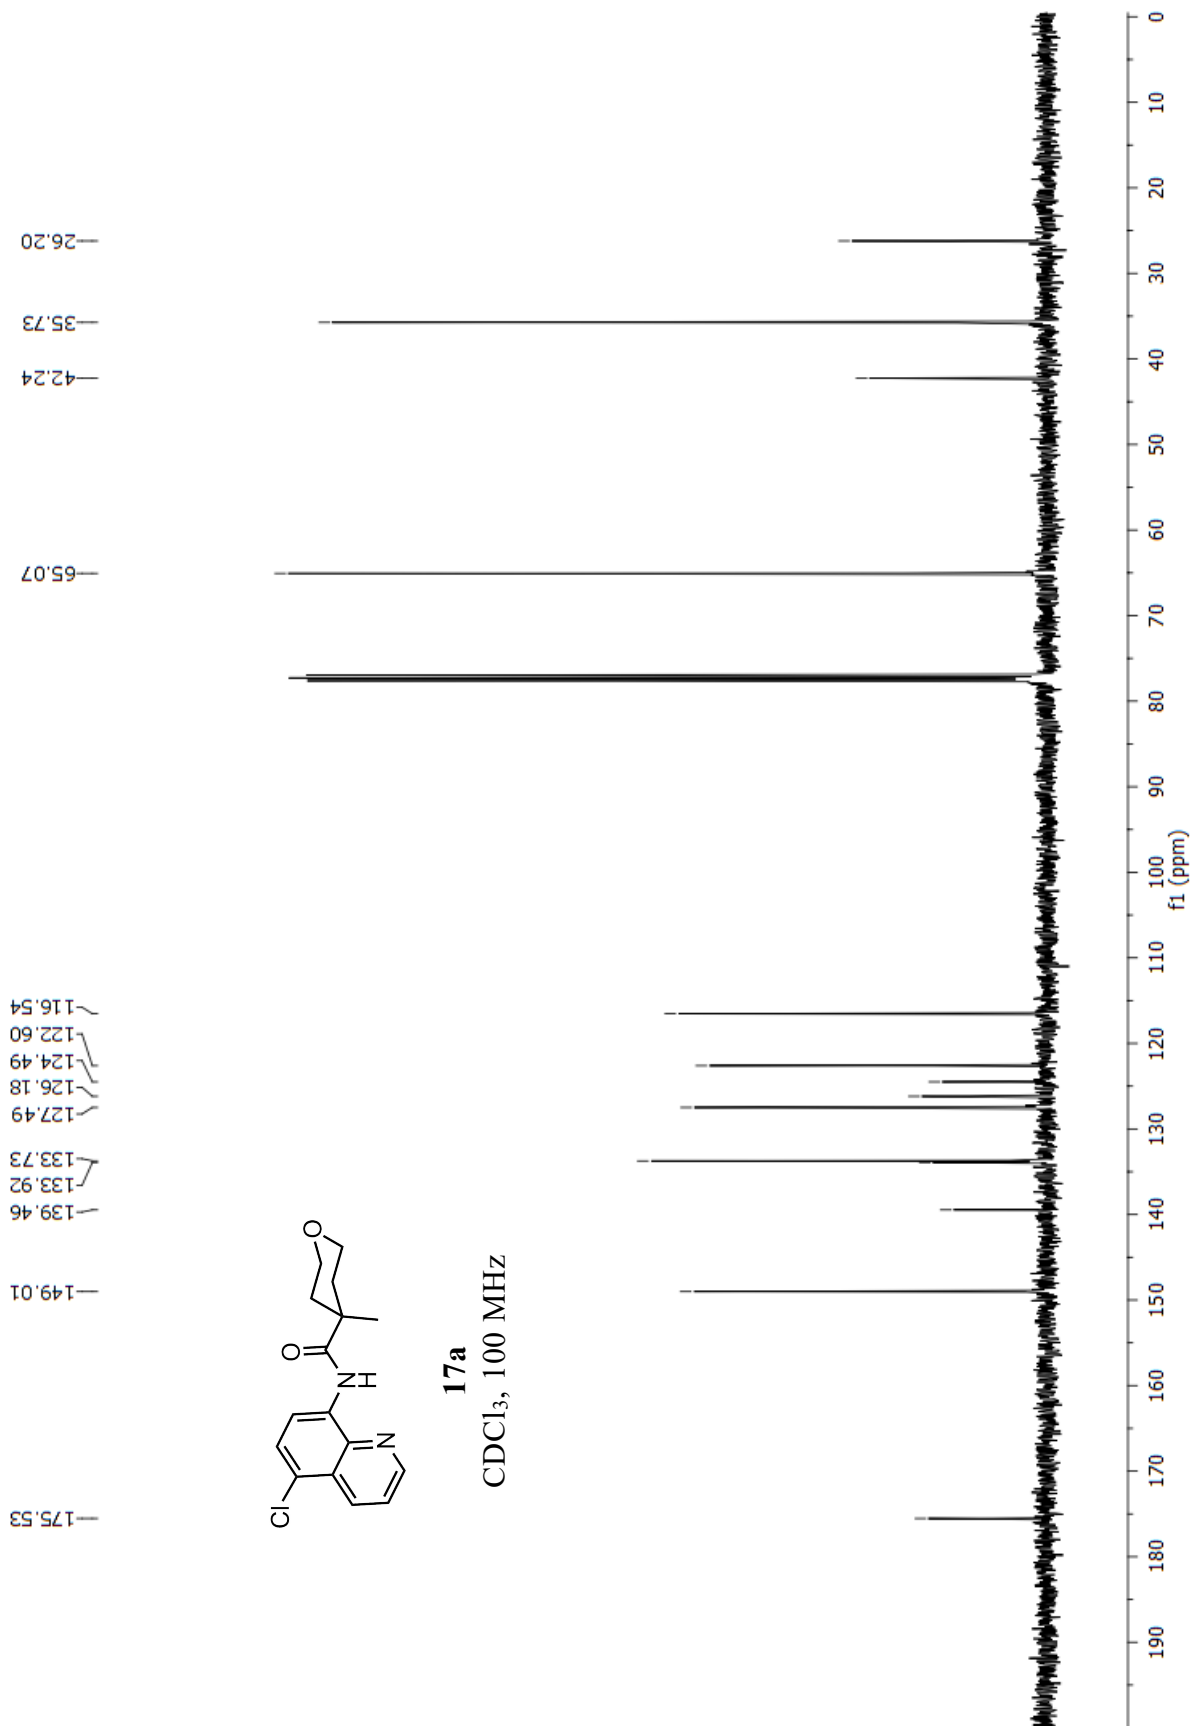

2.63  
2.61  
2.60  
2.58  
2.56  
2.55

9.81  
8.86  
8.85  
8.85  
8.84  
8.77  
8.74  
8.58  
8.57  
8.55  
8.55  
7.60  
7.58  
7.57  
7.56  
7.55

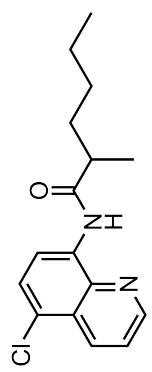

**18a**  
CDCl<sub>3</sub>, 400 MHz

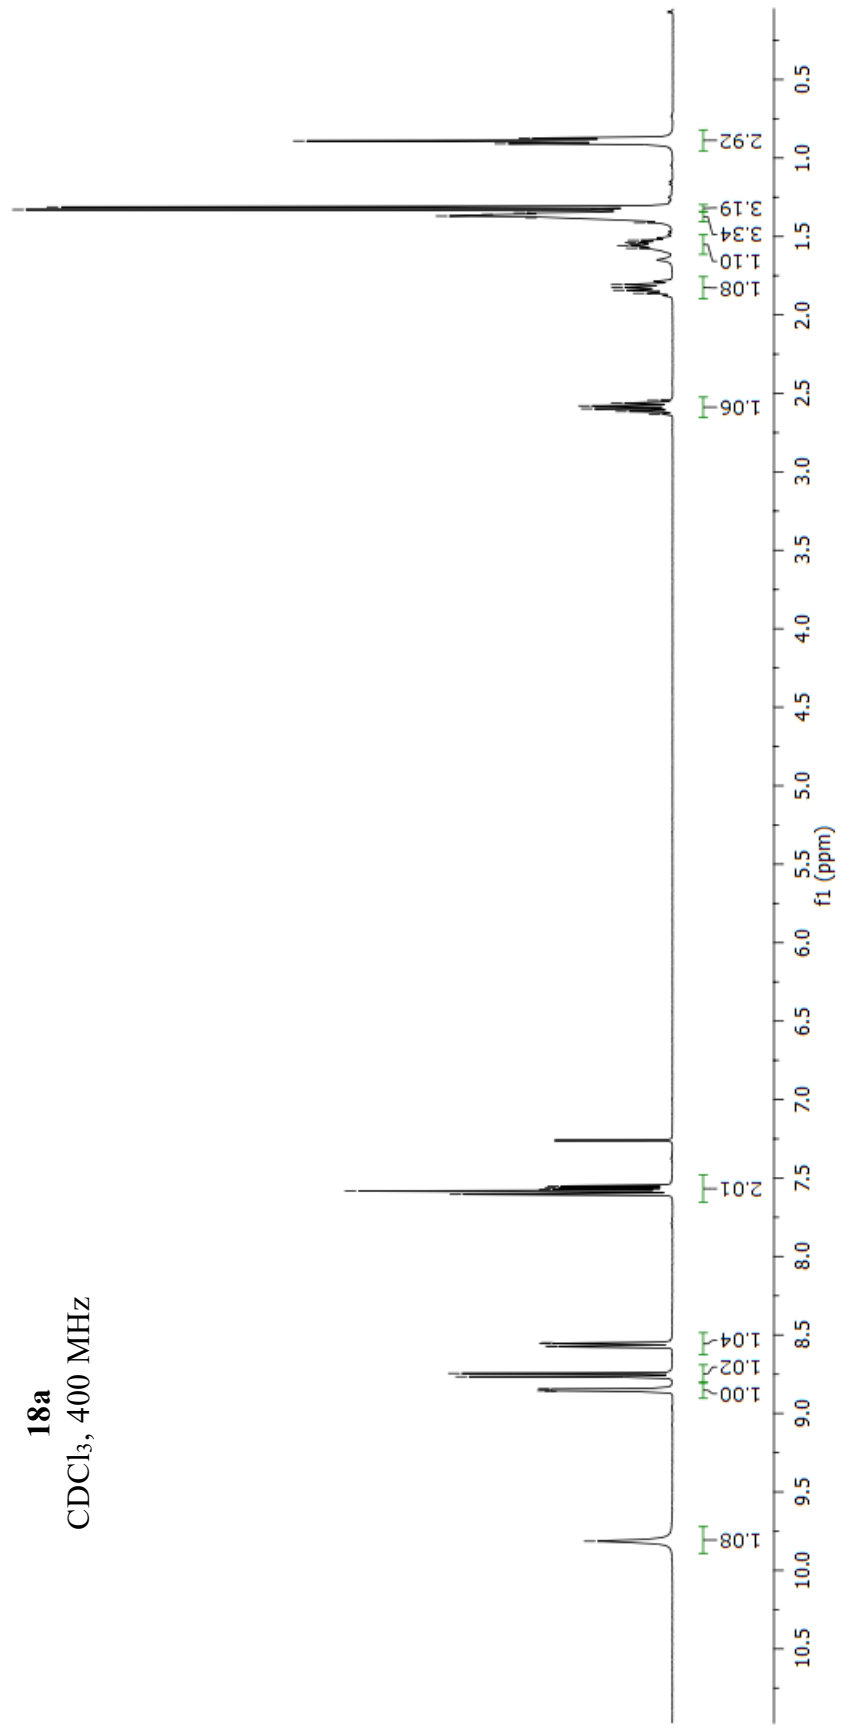

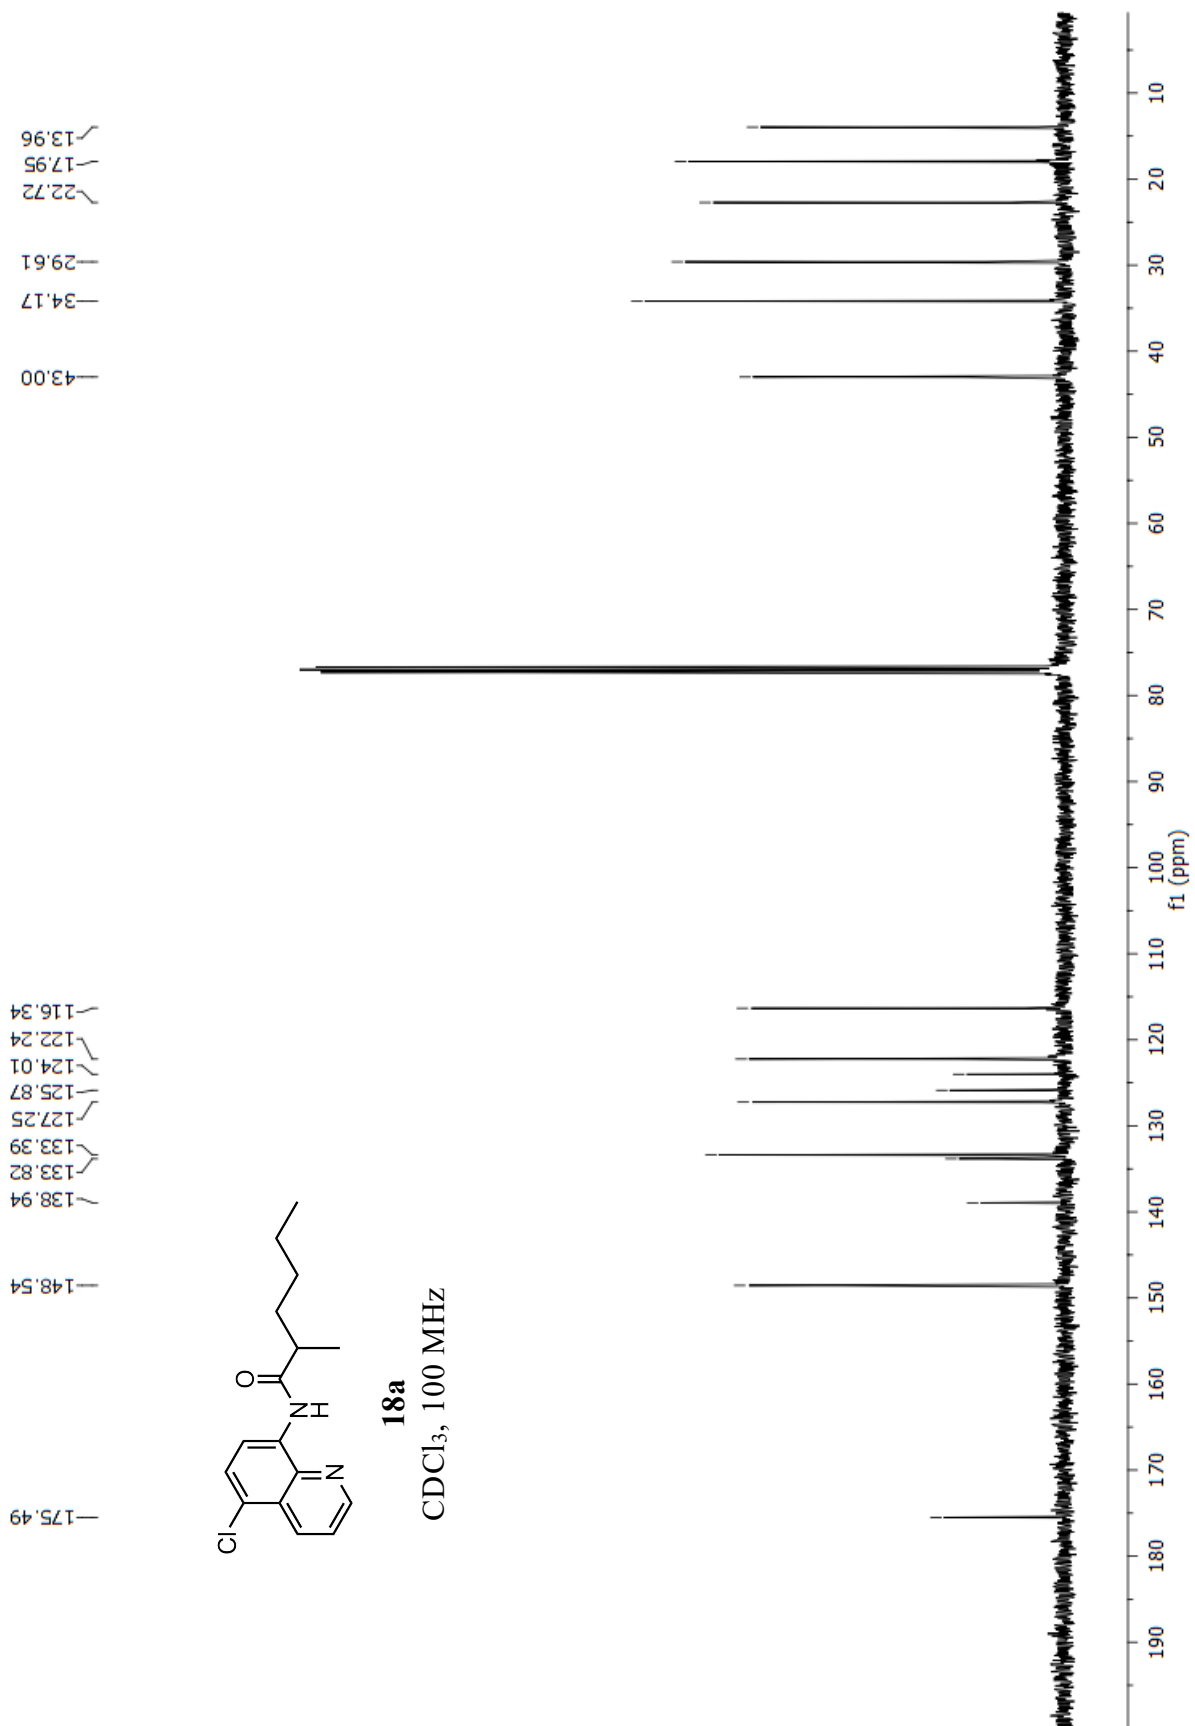



1.92  
1.97  
2.02

7.59  
7.60  
7.61  
7.62  
7.64  
8.57  
8.57  
8.59  
8.59  
8.68  
8.70  
8.89  
8.89  
8.90  
8.90

10.66

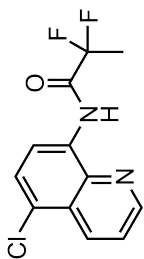

**19a**  
CDCl<sub>3</sub>, 400 MHz

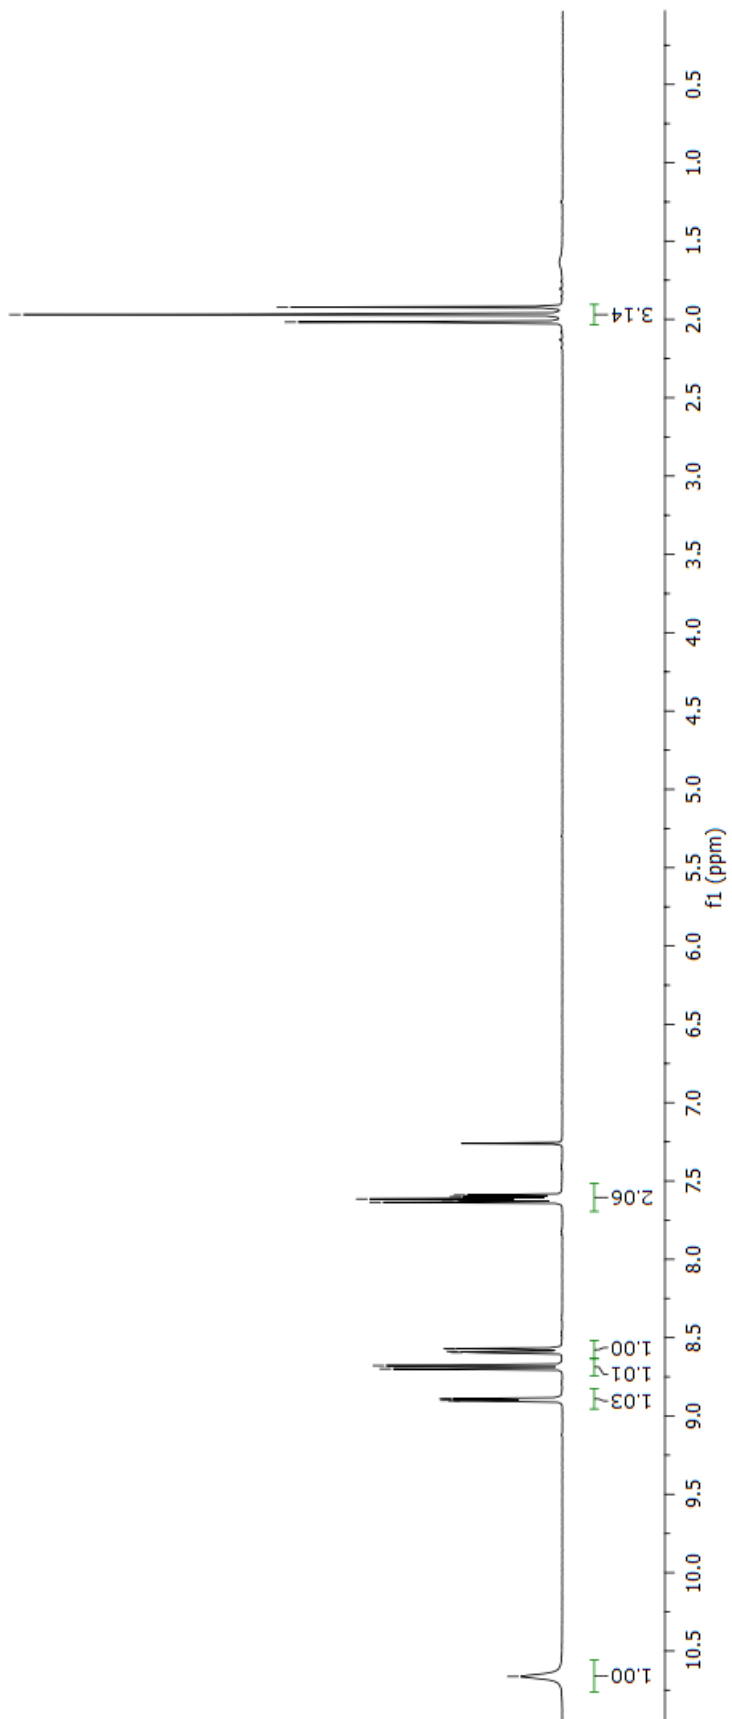

21.43  
21.18  
20.93

139.29  
133.58  
132.24  
127.10  
126.12  
123.01  
122.82  
119.92  
117.43  
117.18

163.01  
162.72  
162.43  
149.37

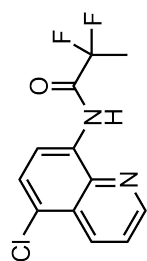

**19a**  
CDCl<sub>3</sub>, 100 MHz

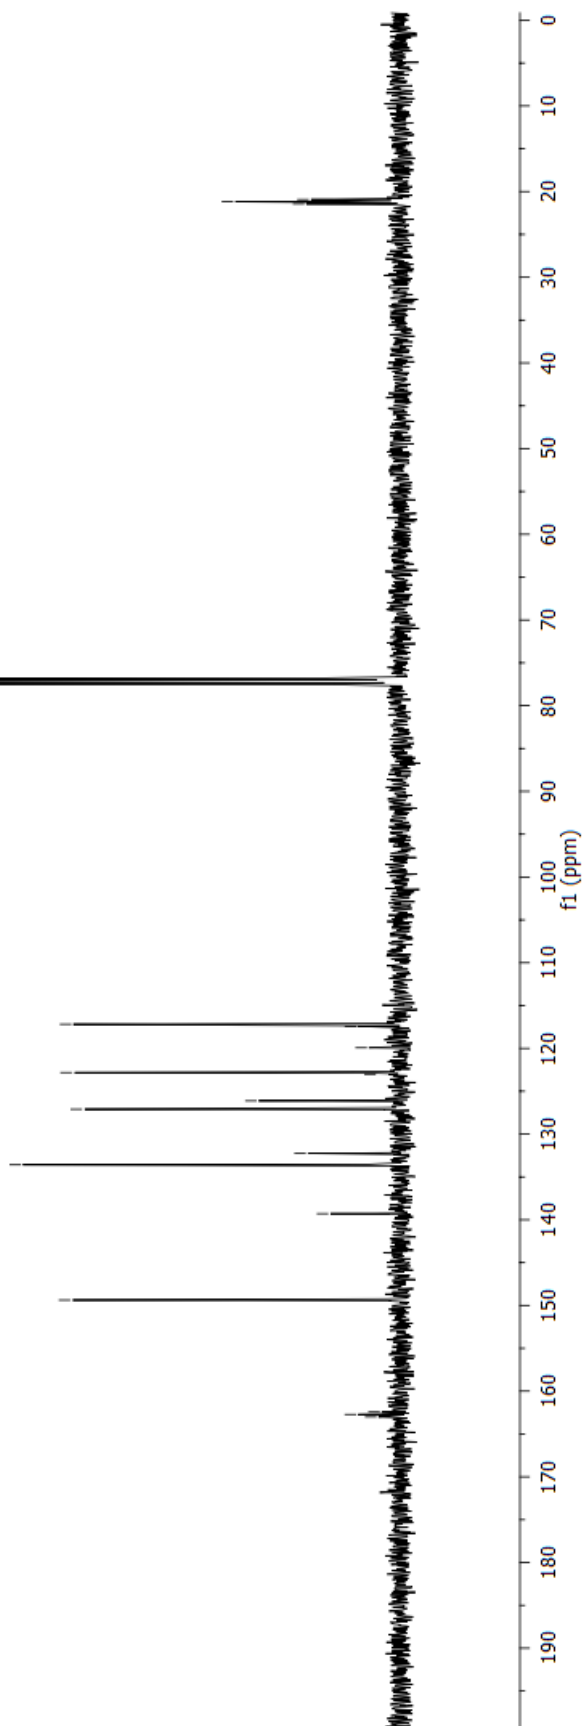

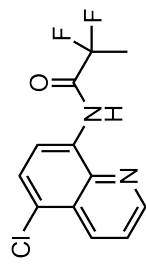

**19a**  
CDCl<sub>3</sub>, 376 MHz

98.86  
98.85  
98.81  
98.80  
98.76  
98.75  
98.71  
98.70

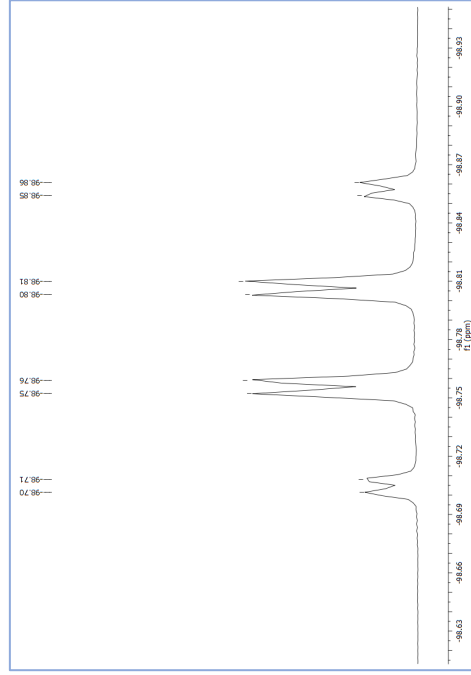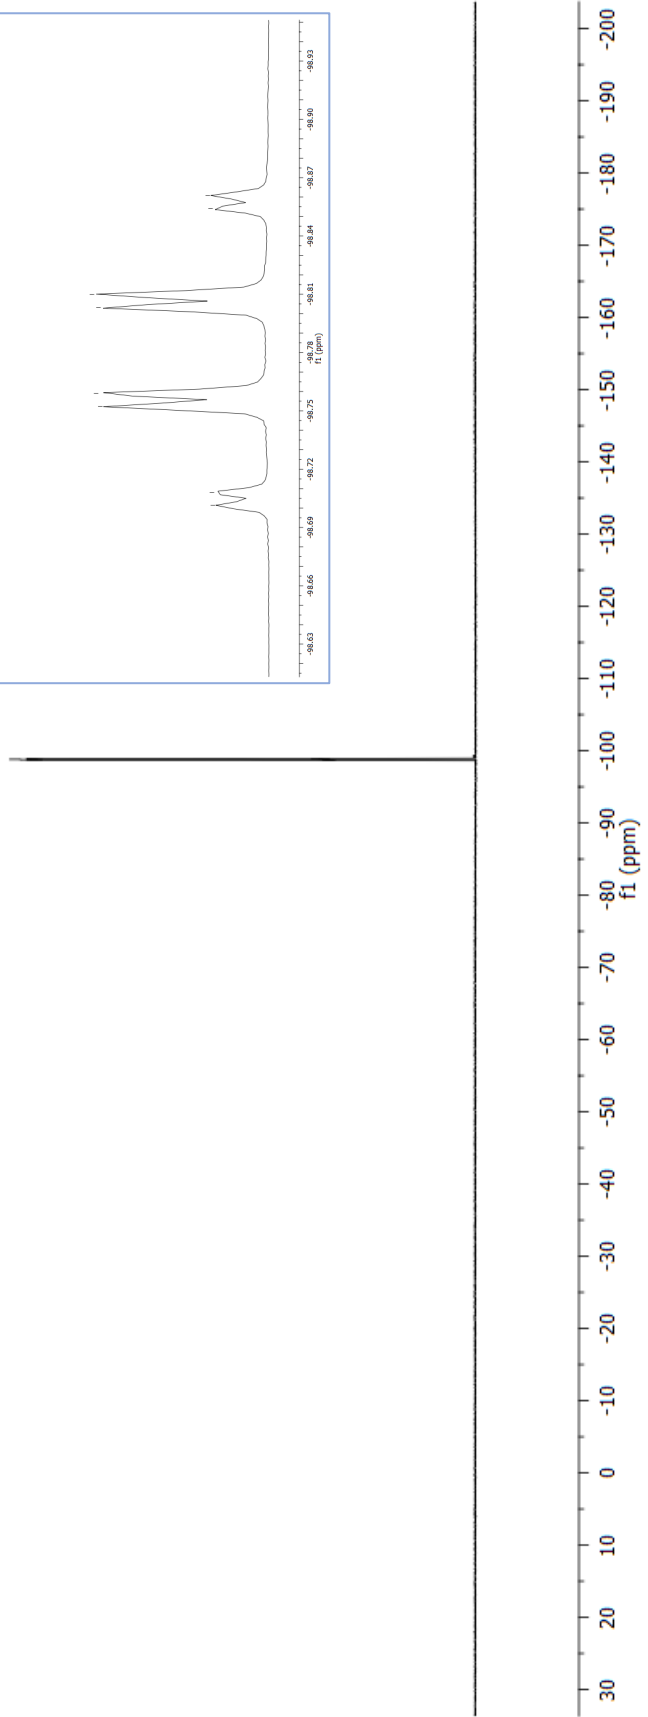

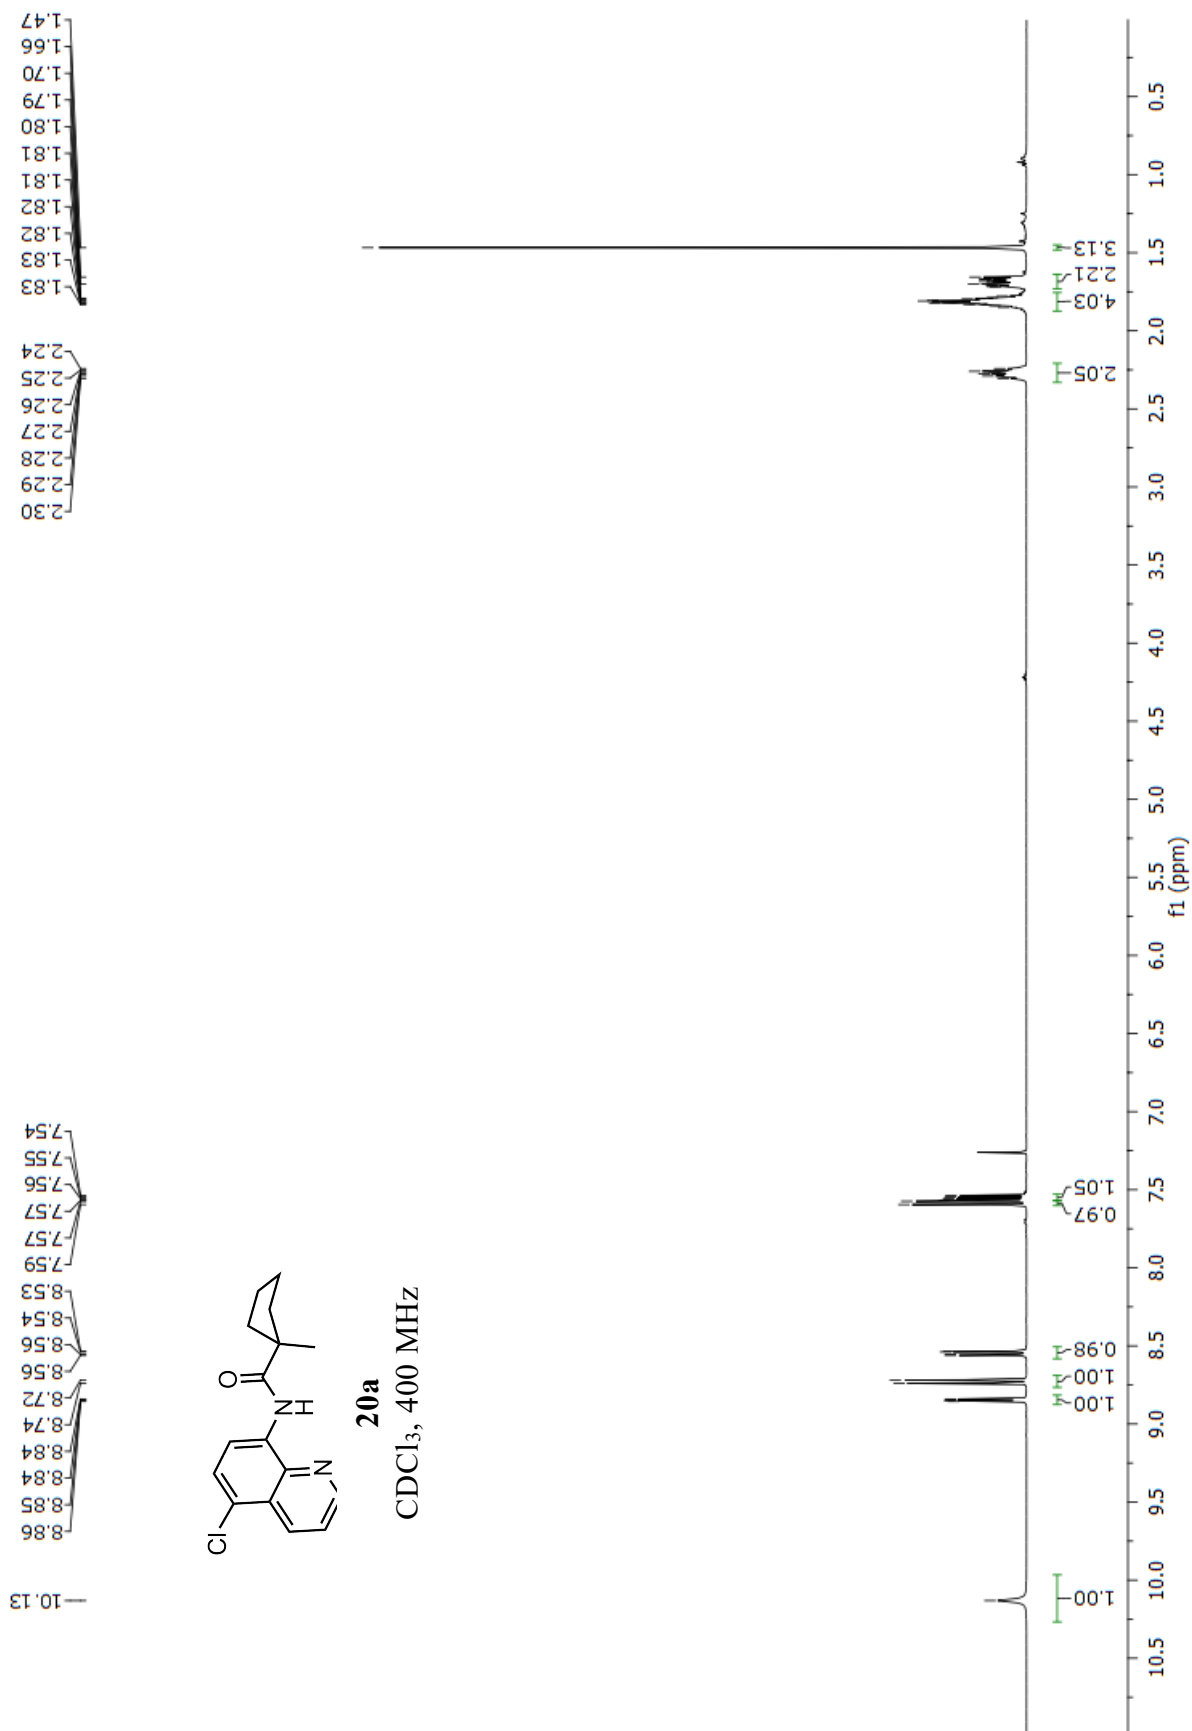

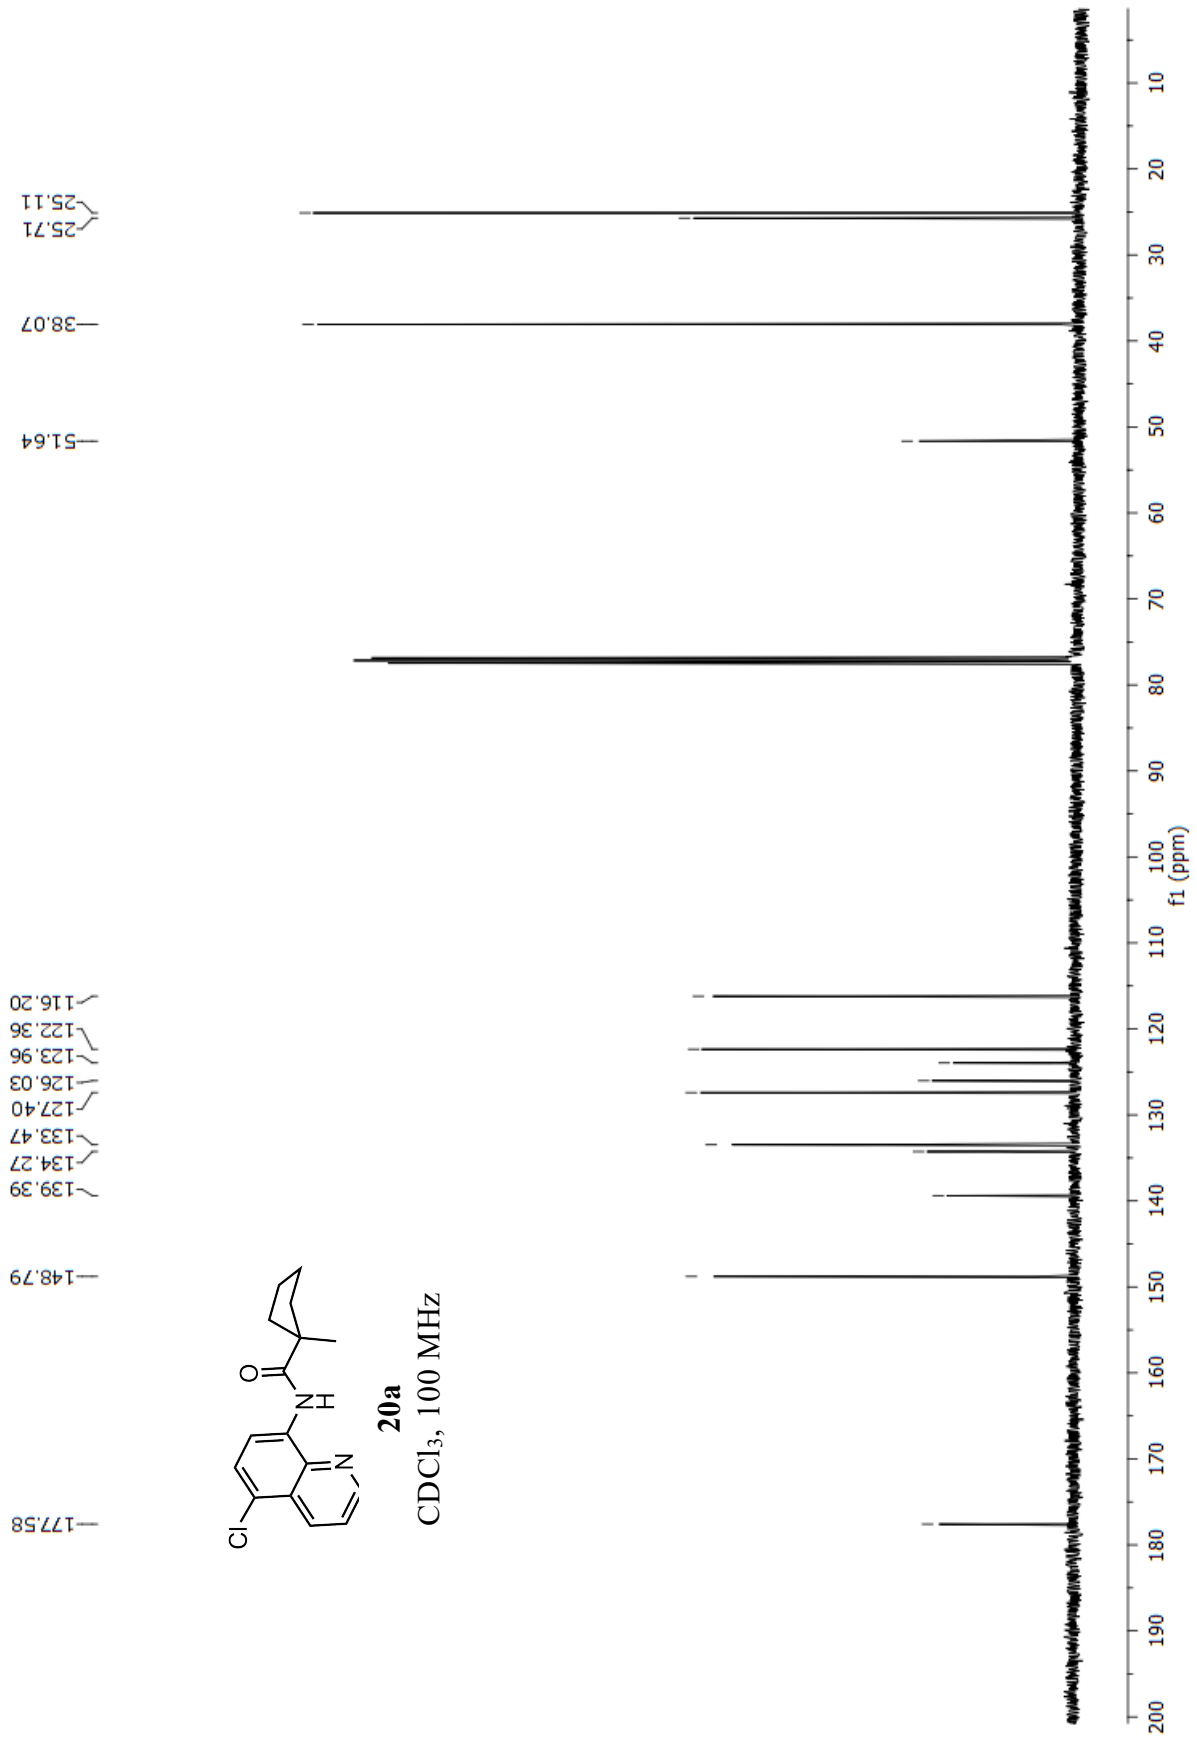

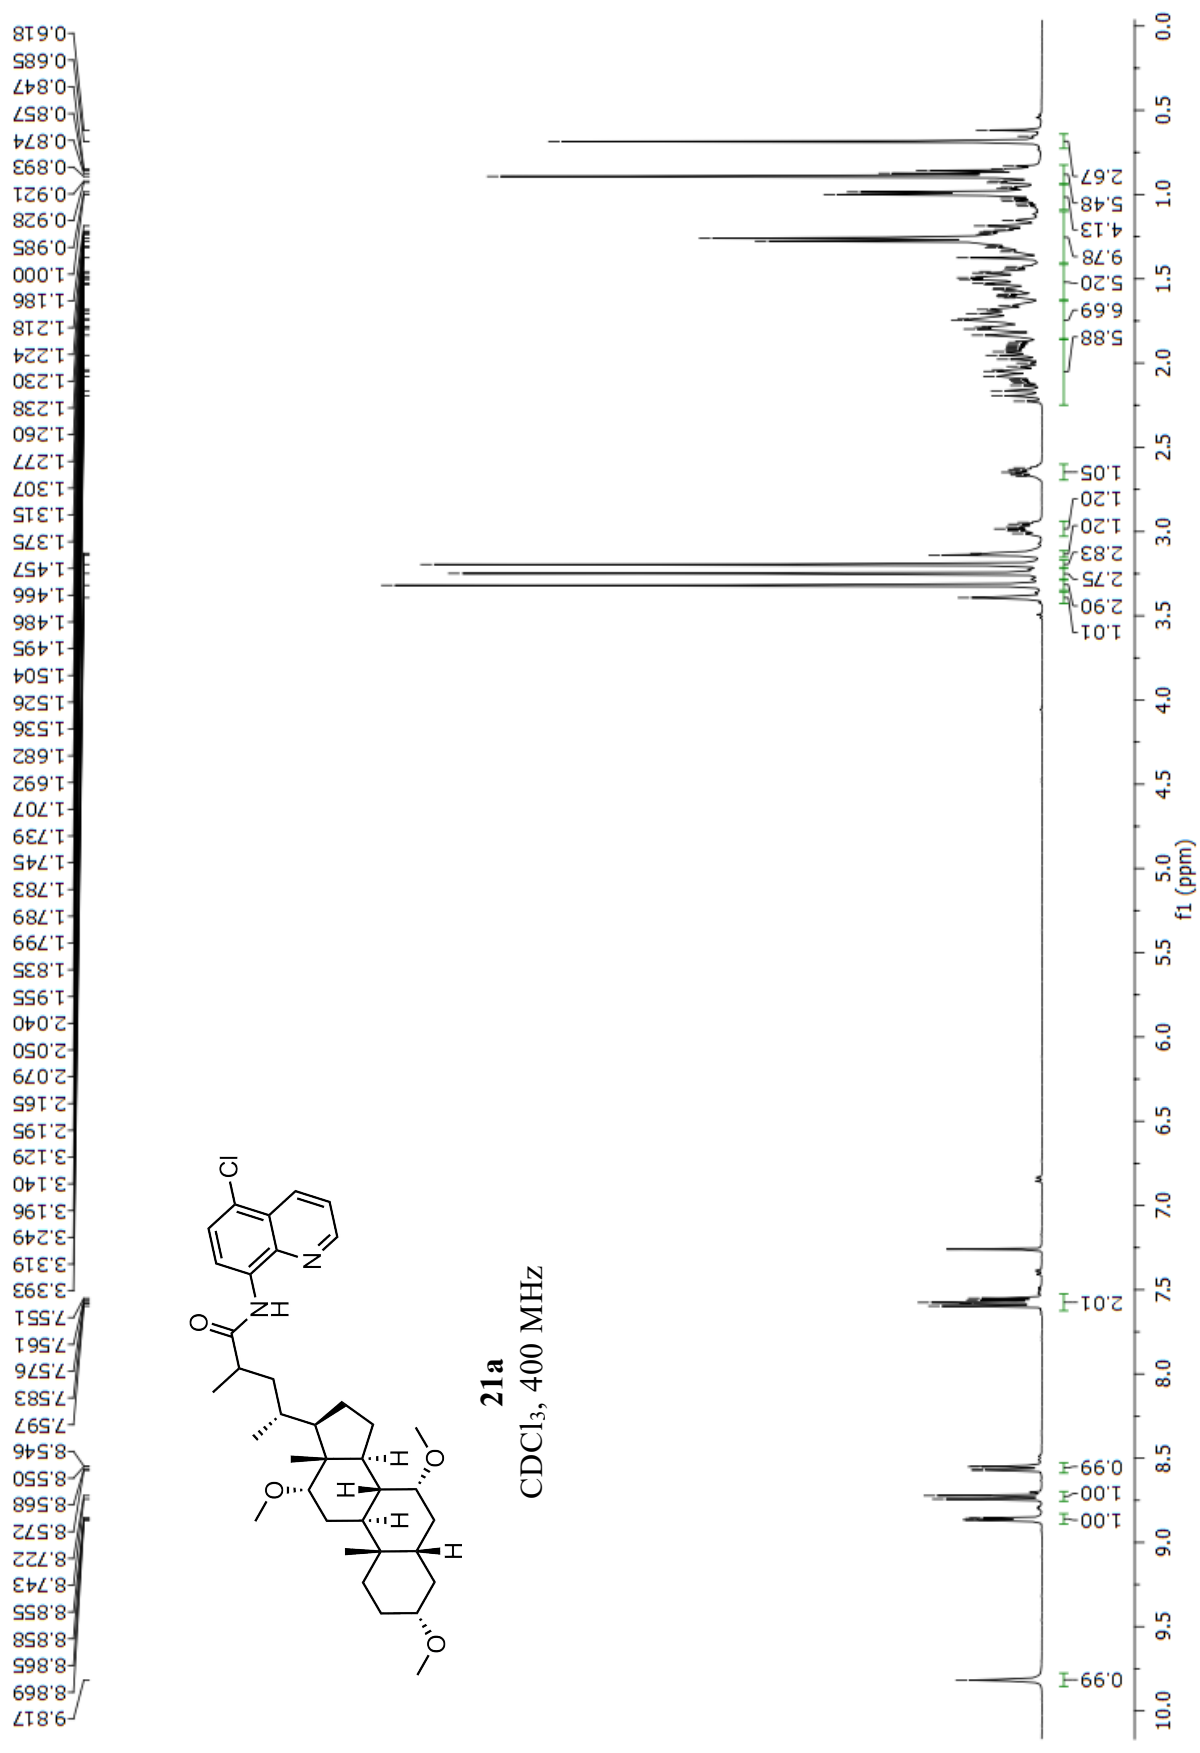

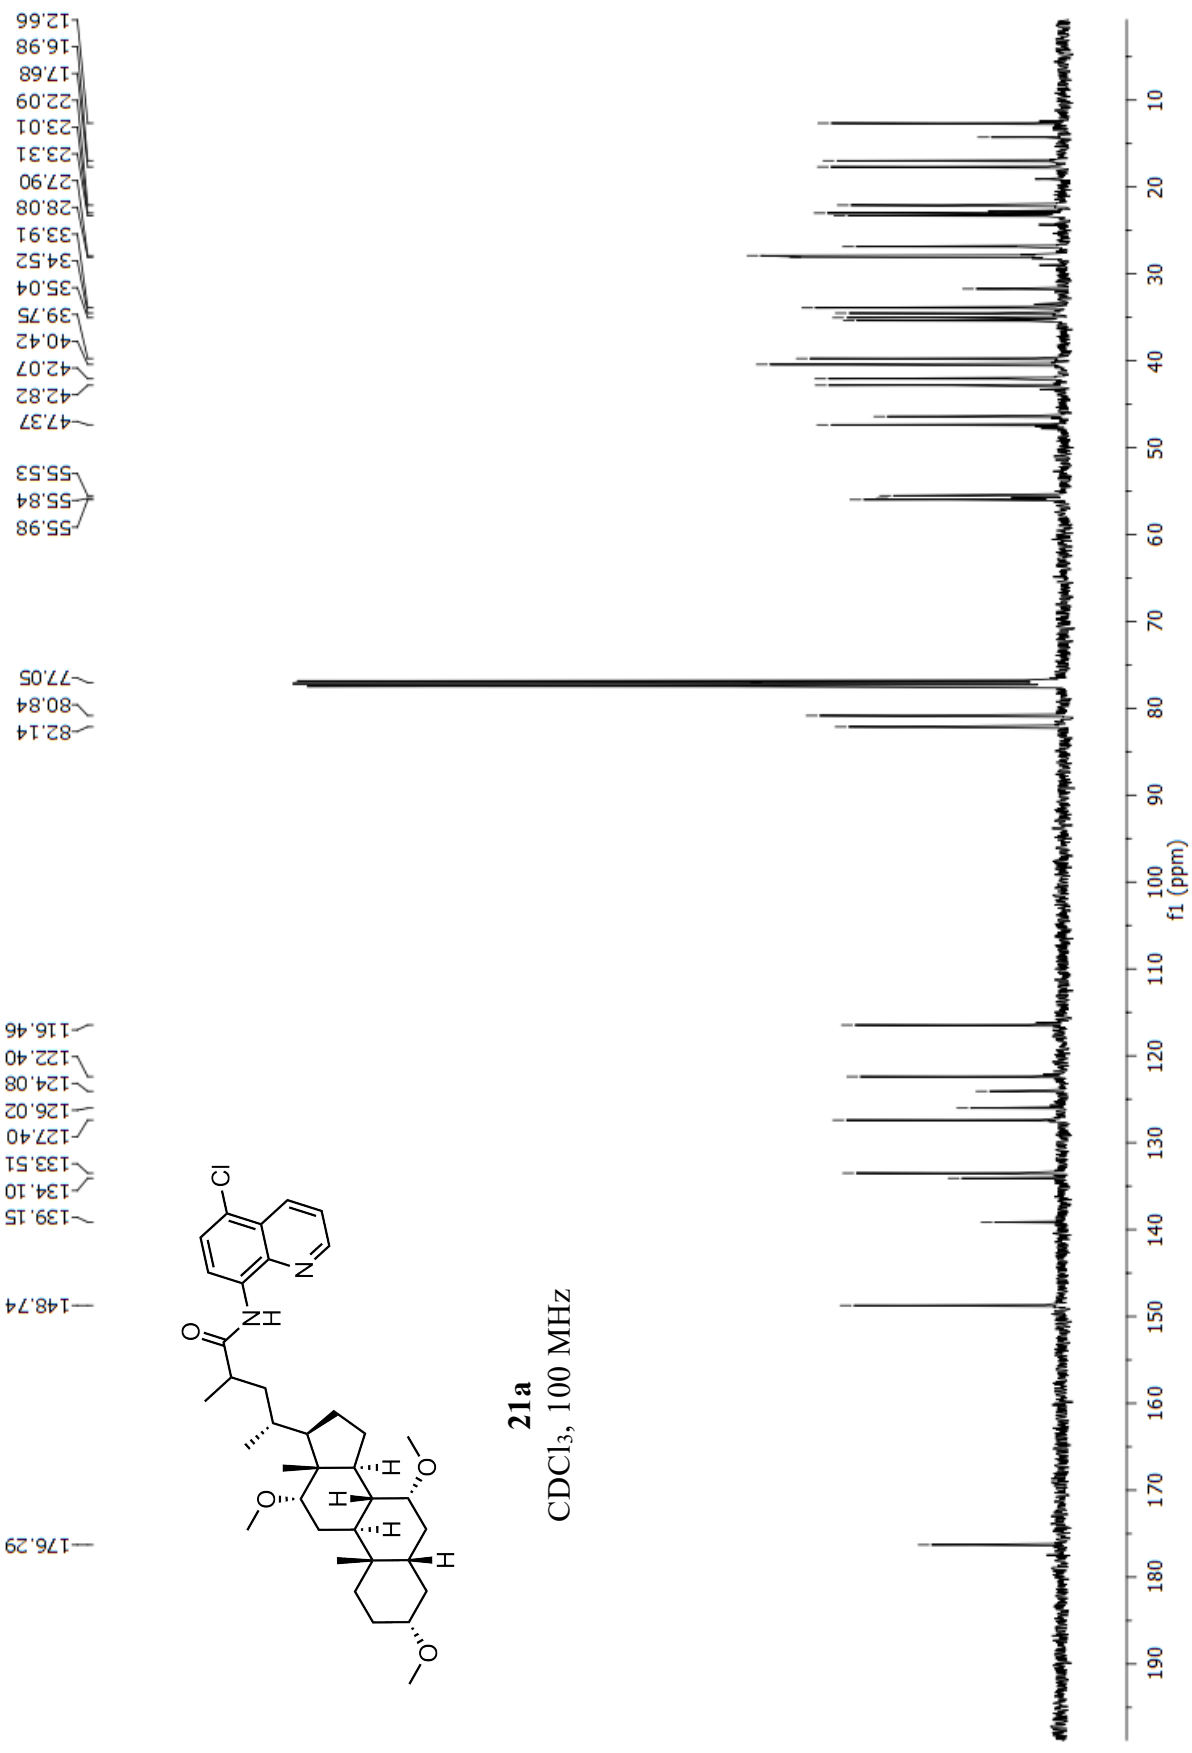

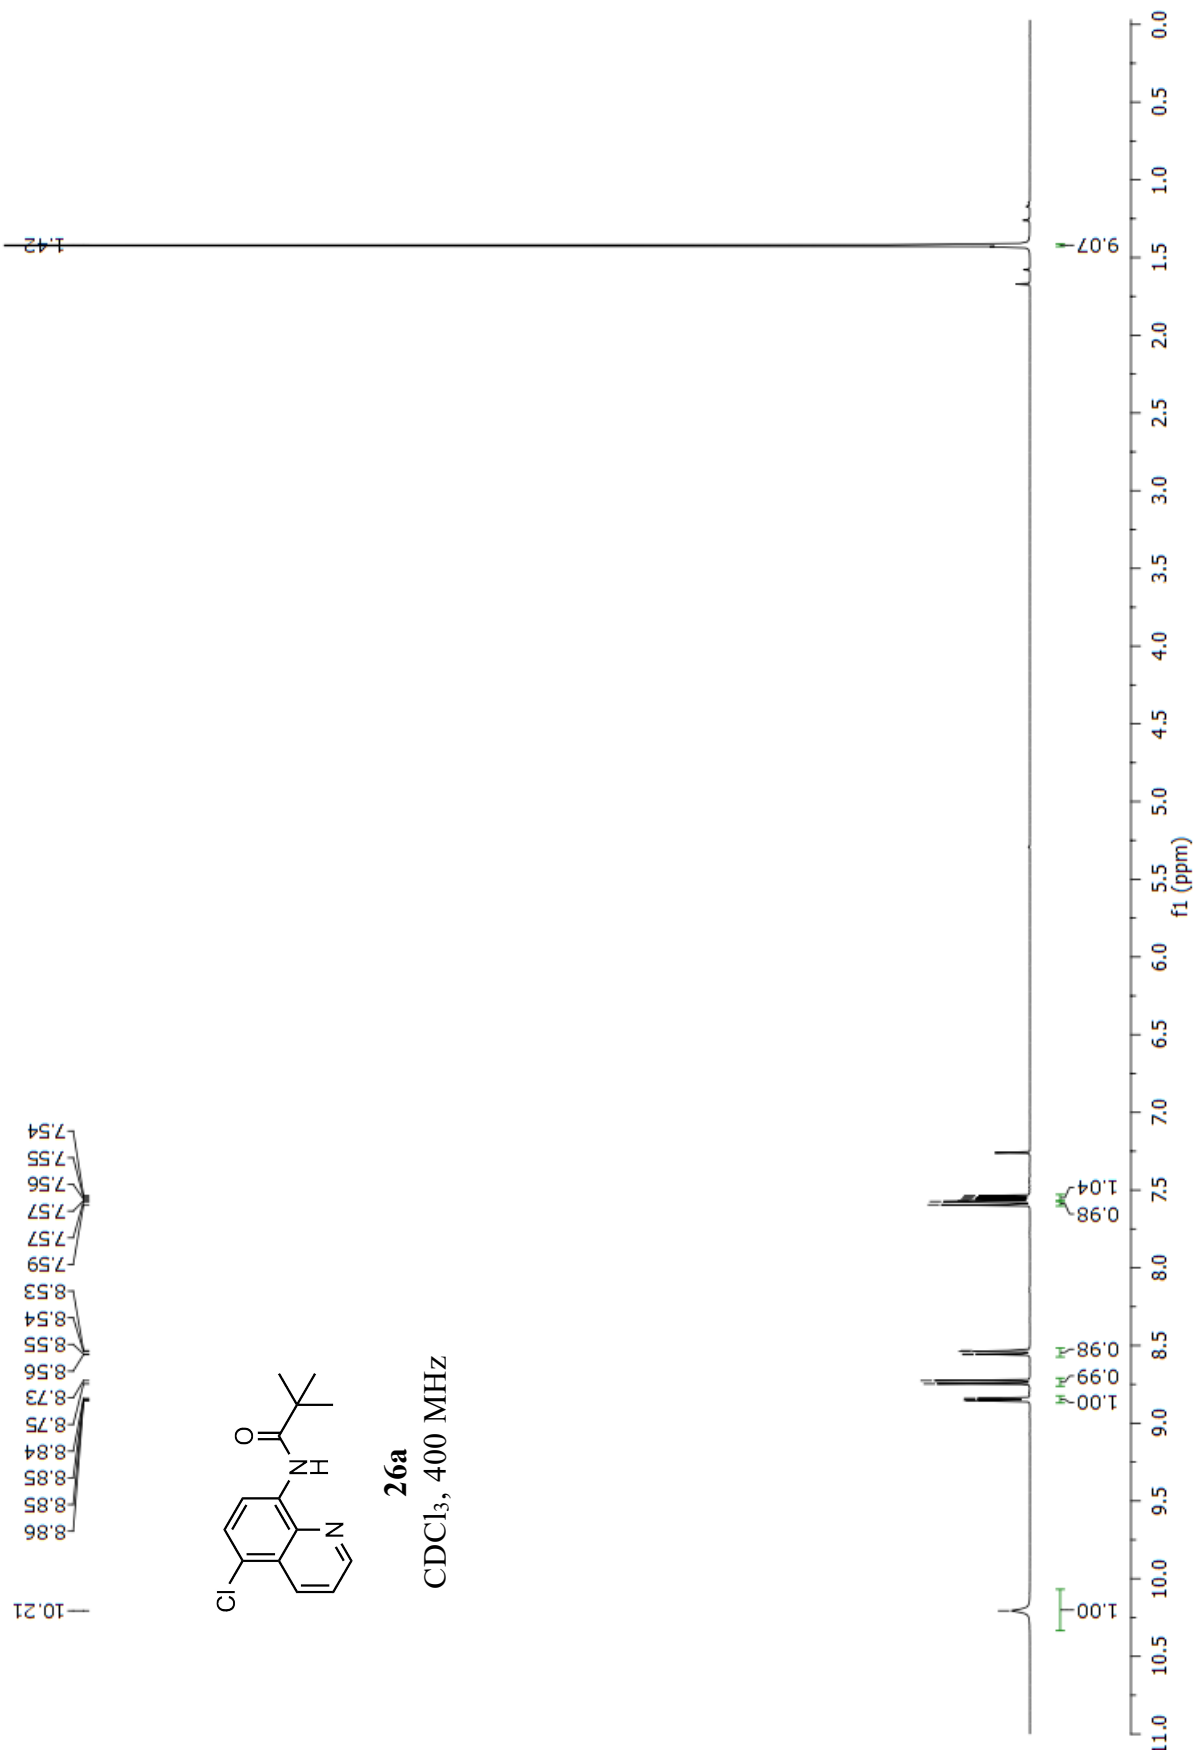



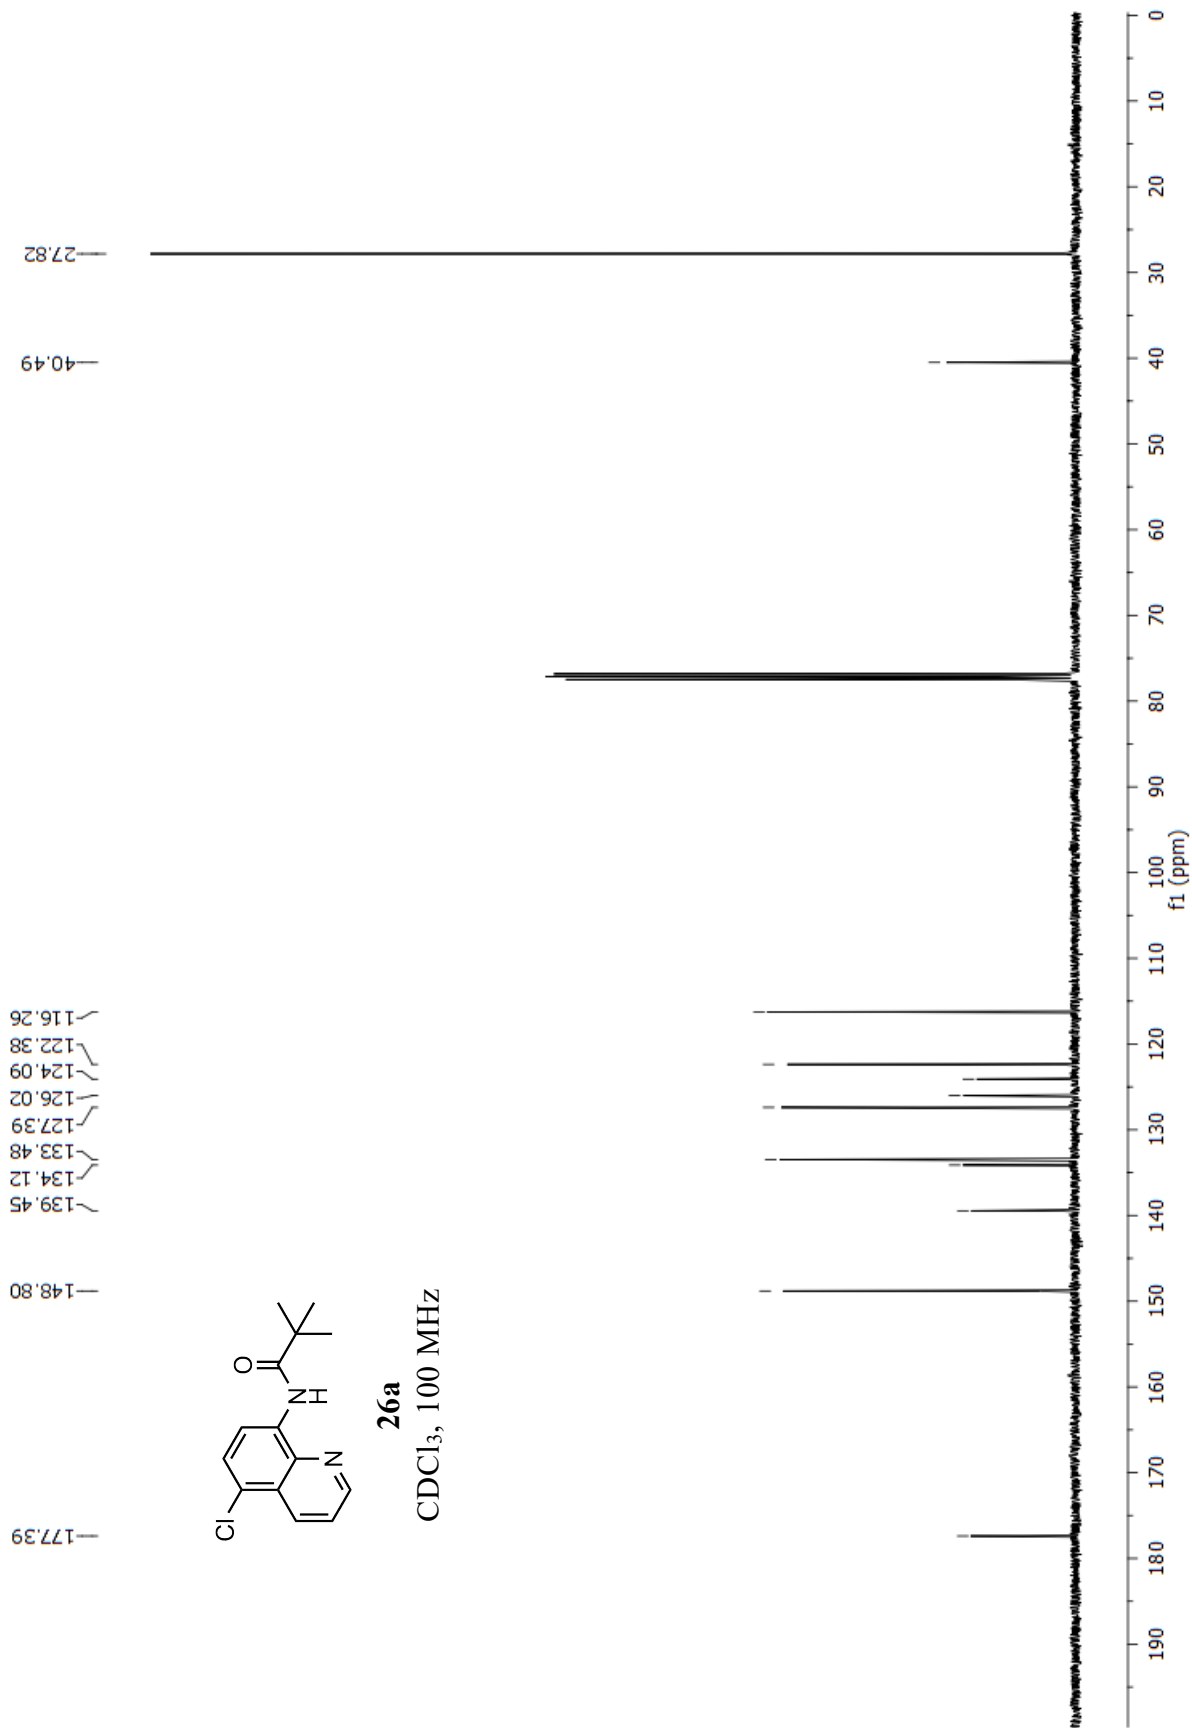

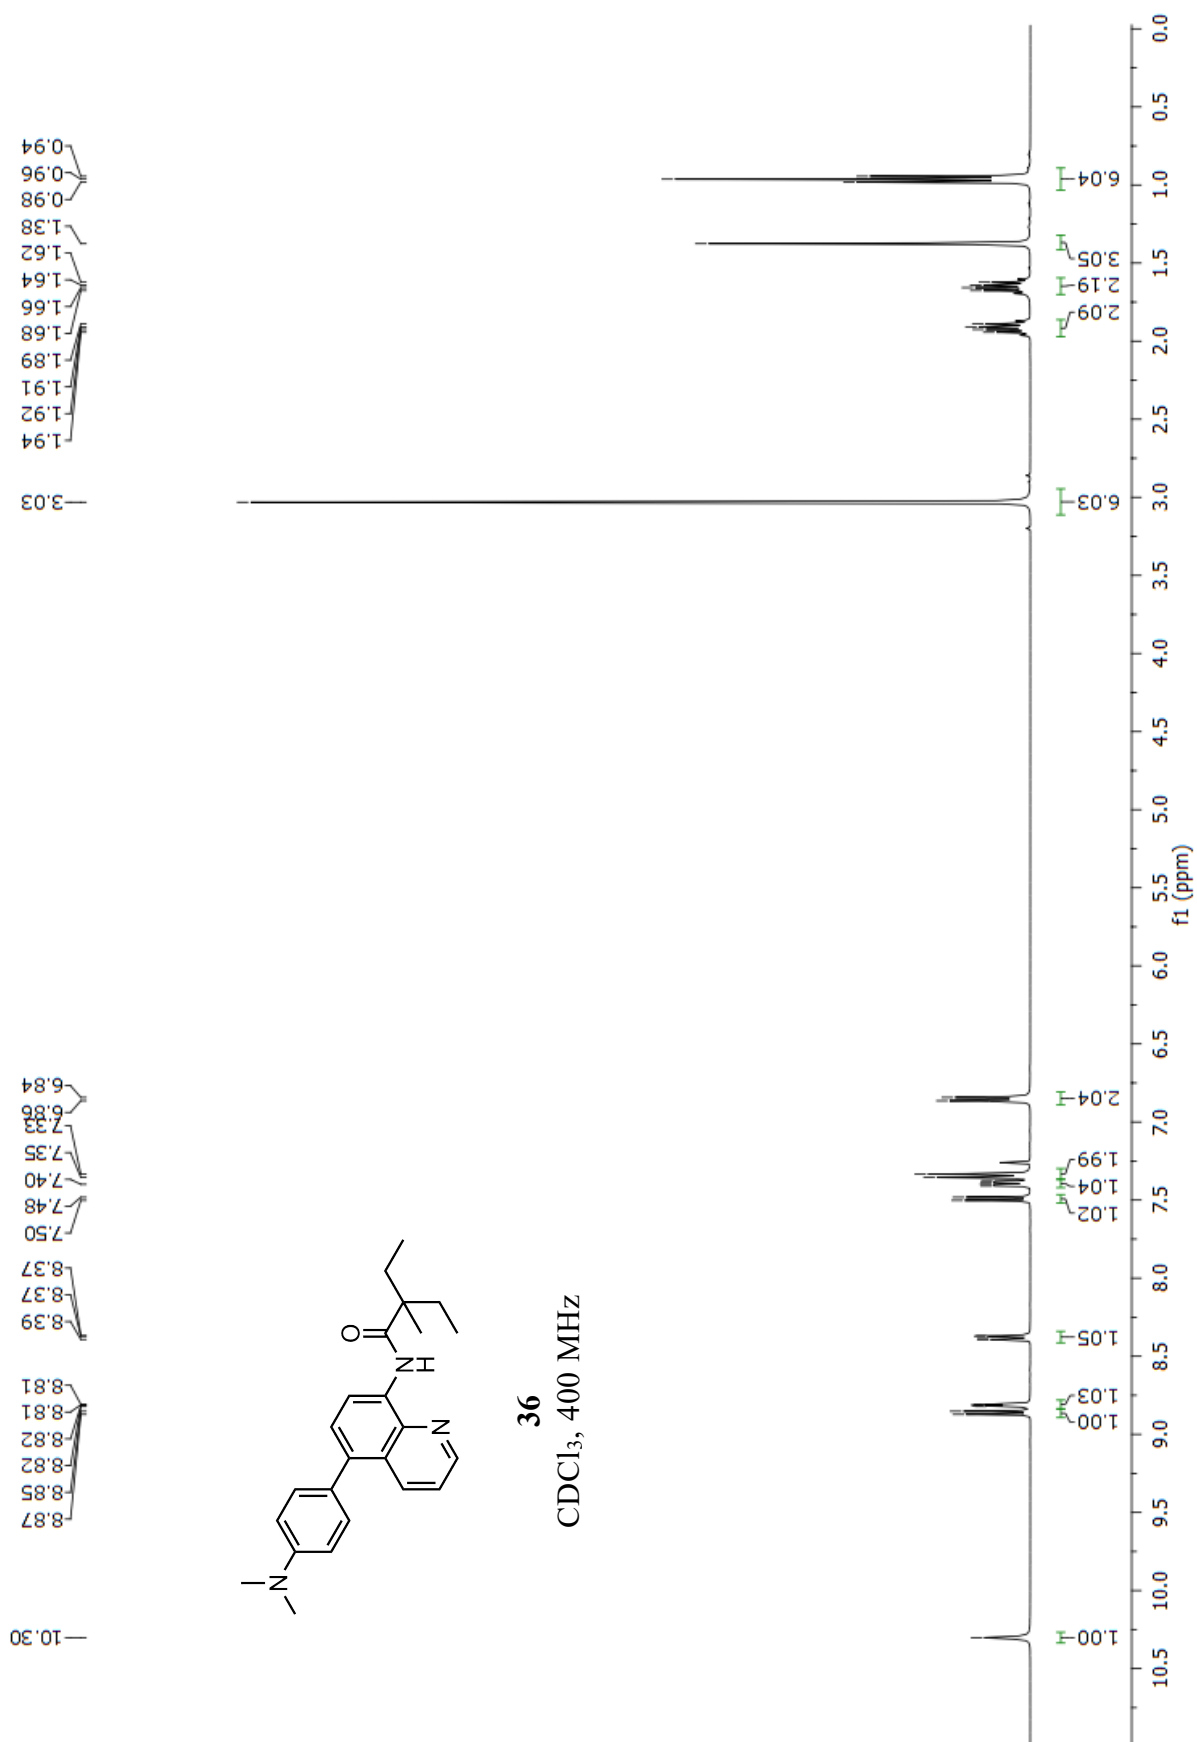

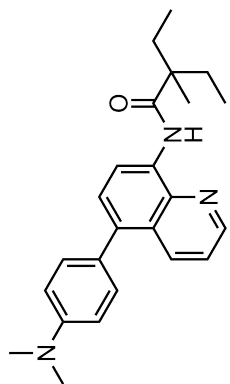

**36**  
CDCl<sub>3</sub>, 100 MHz

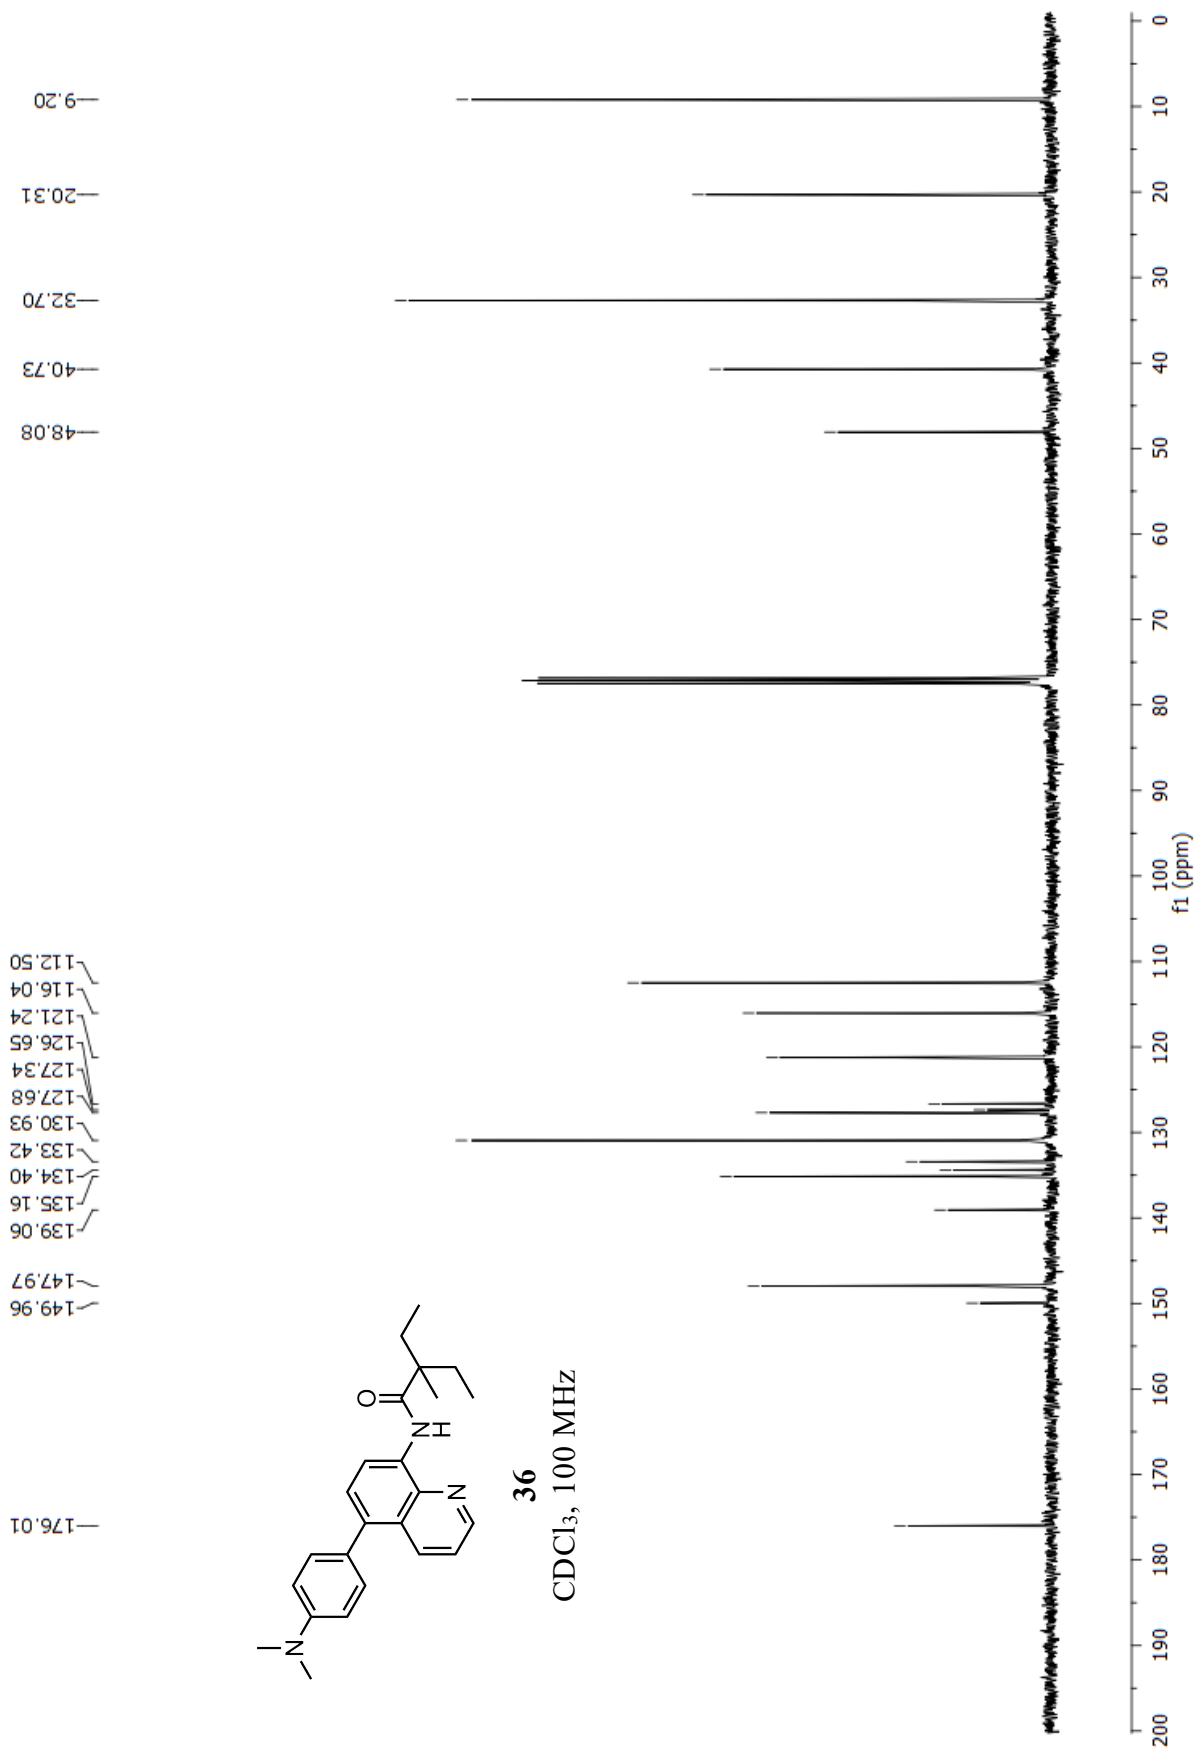

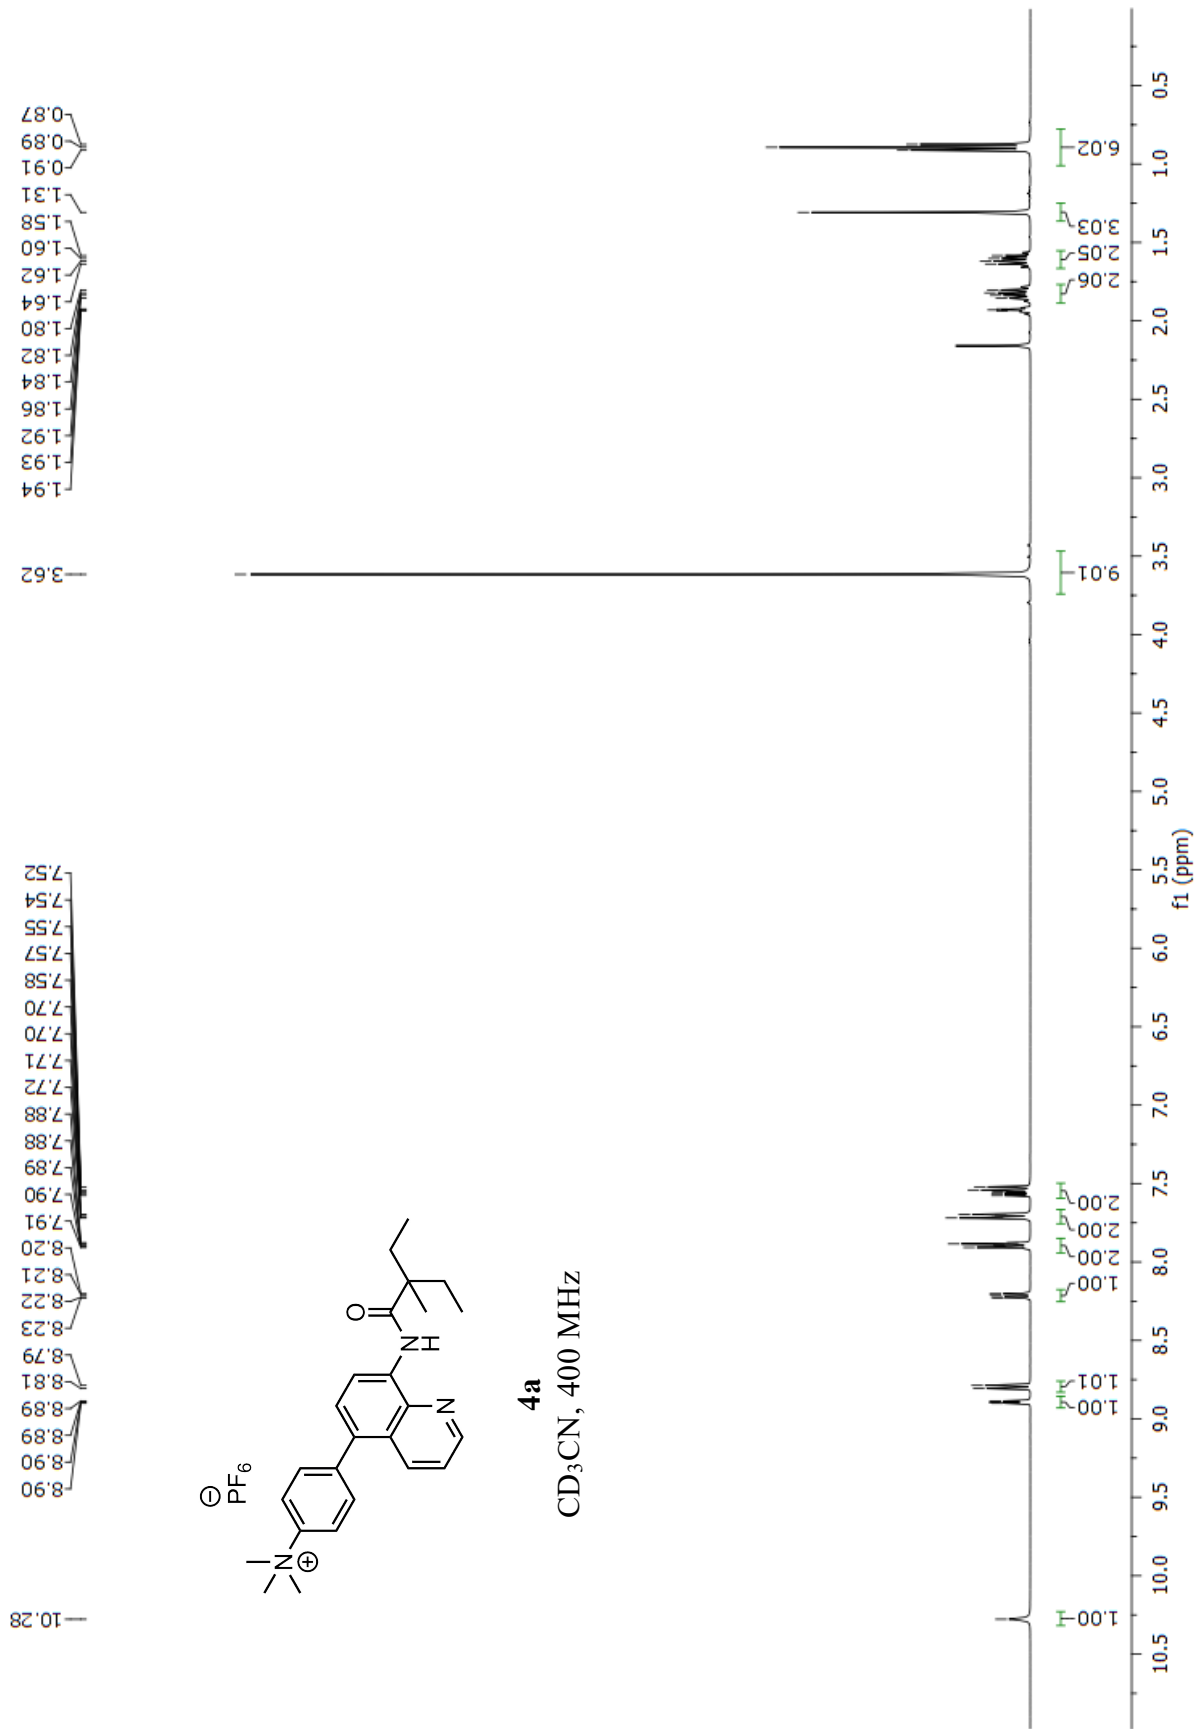

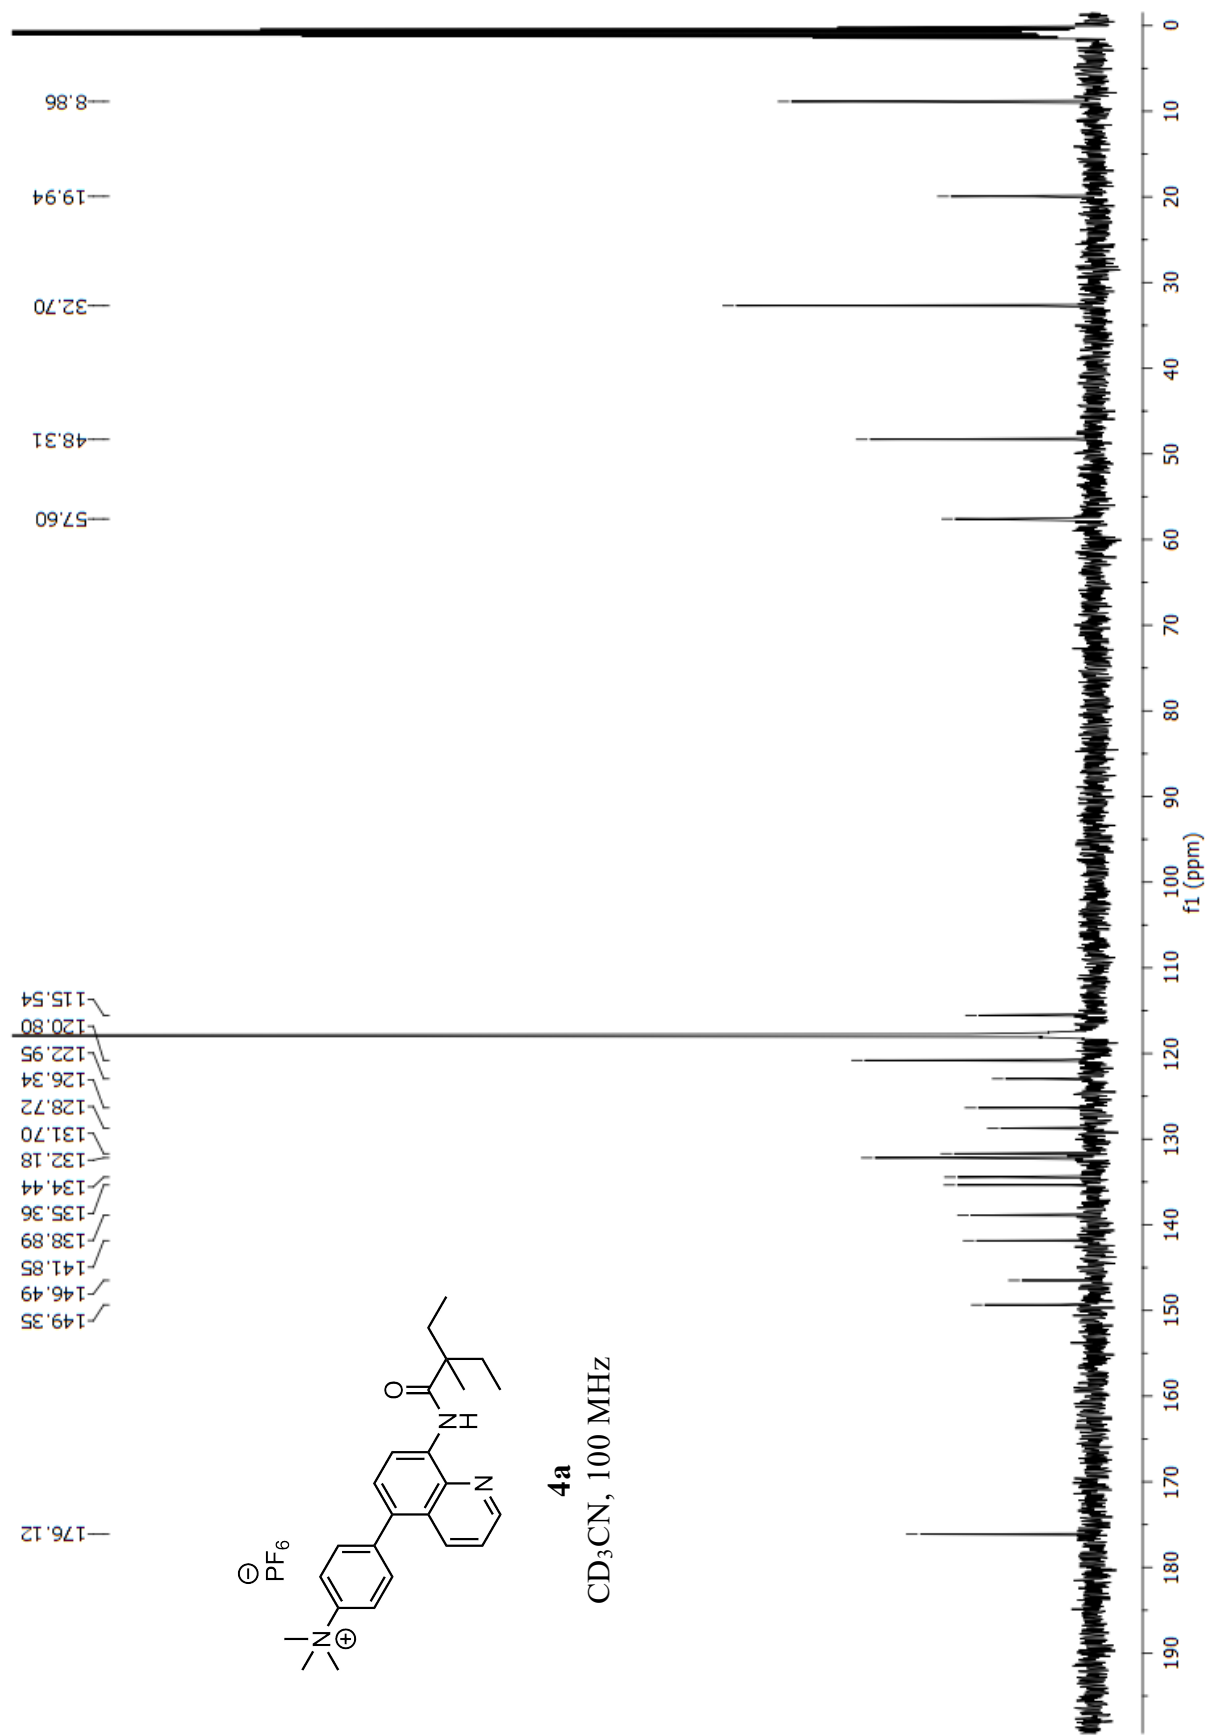

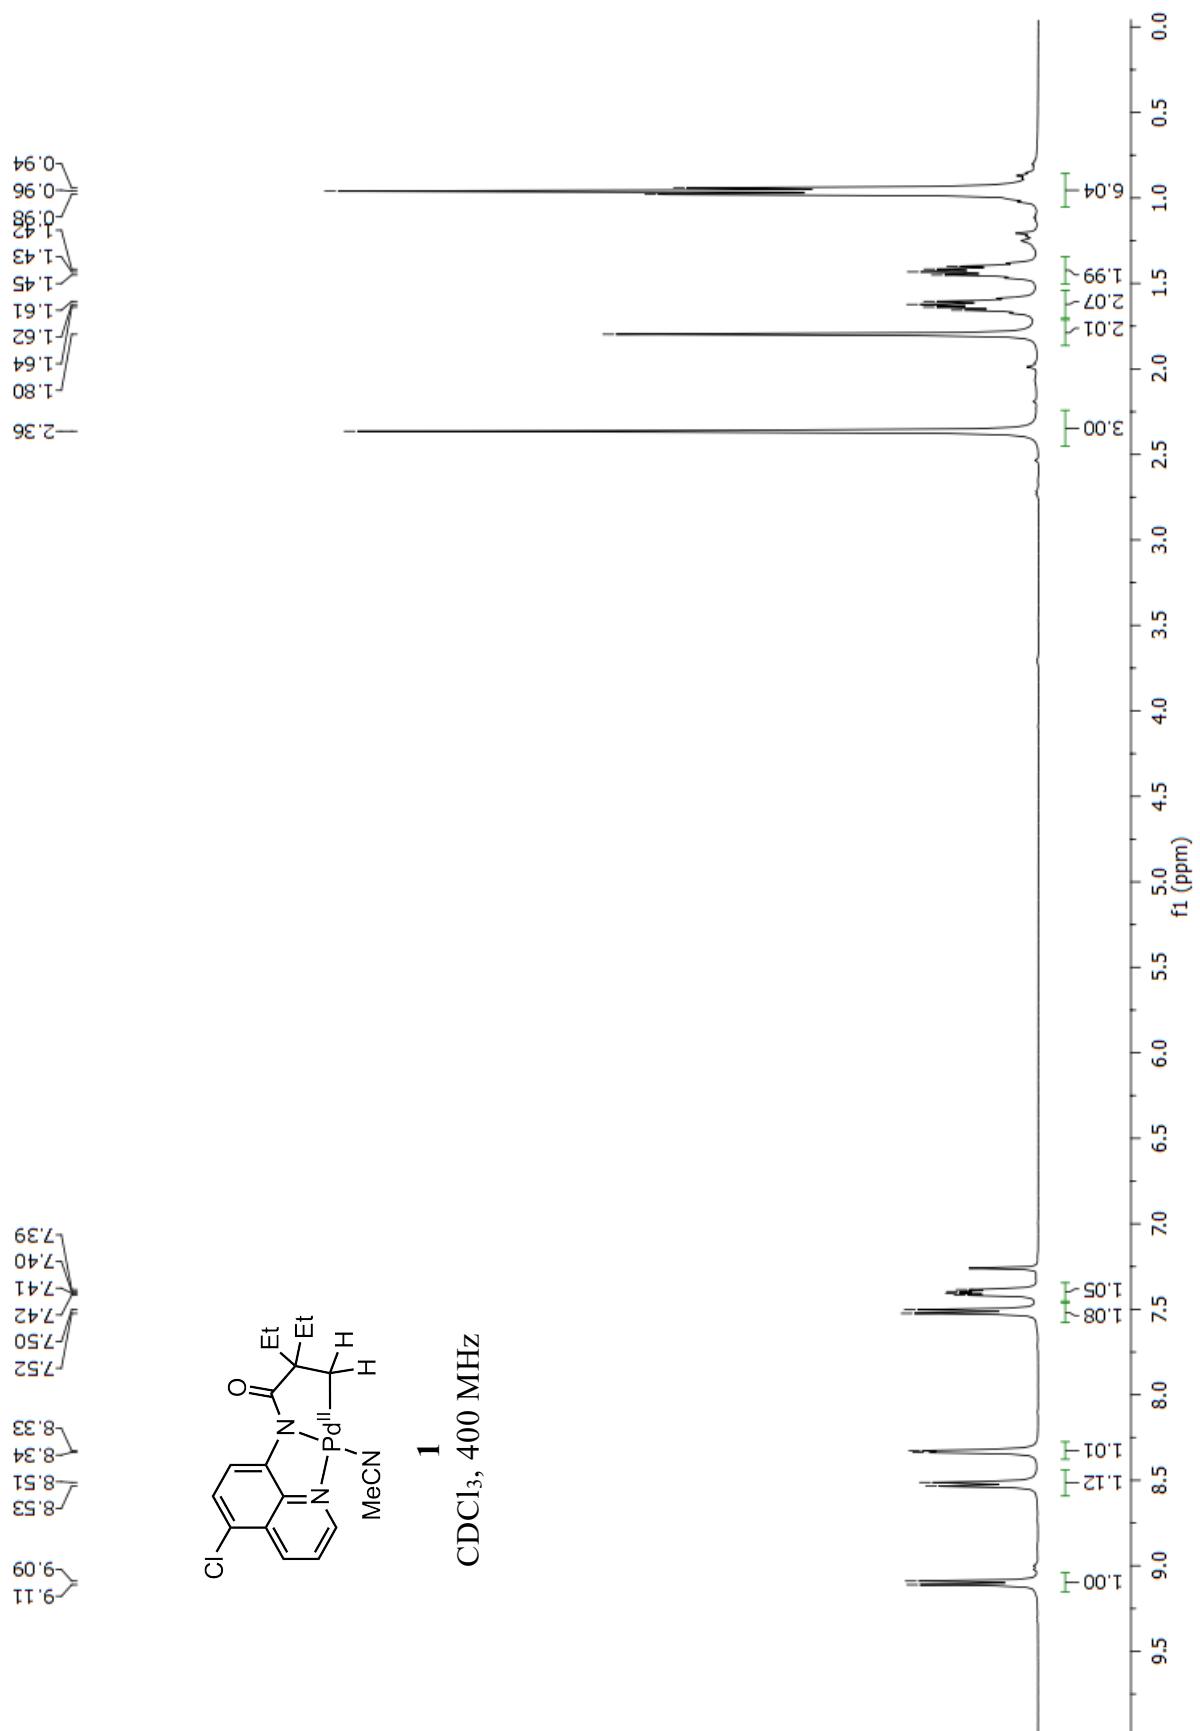

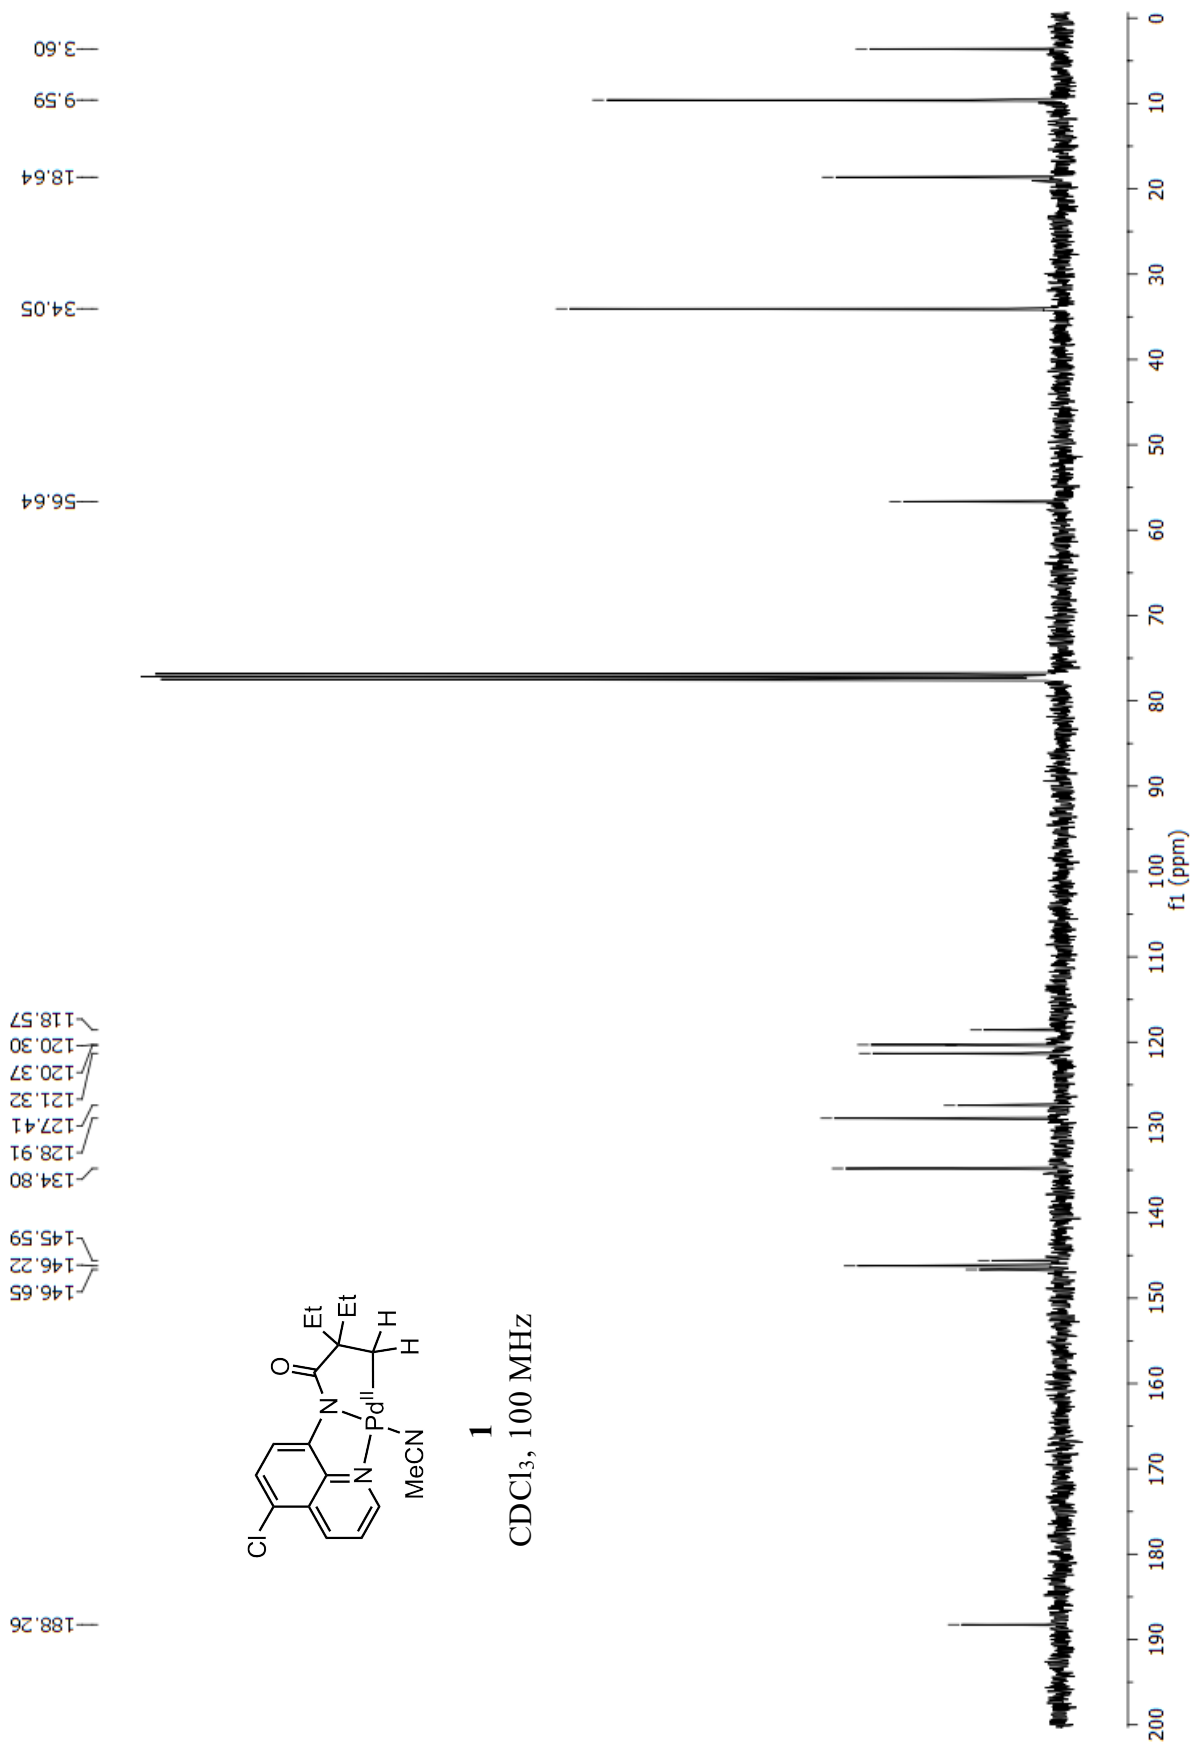

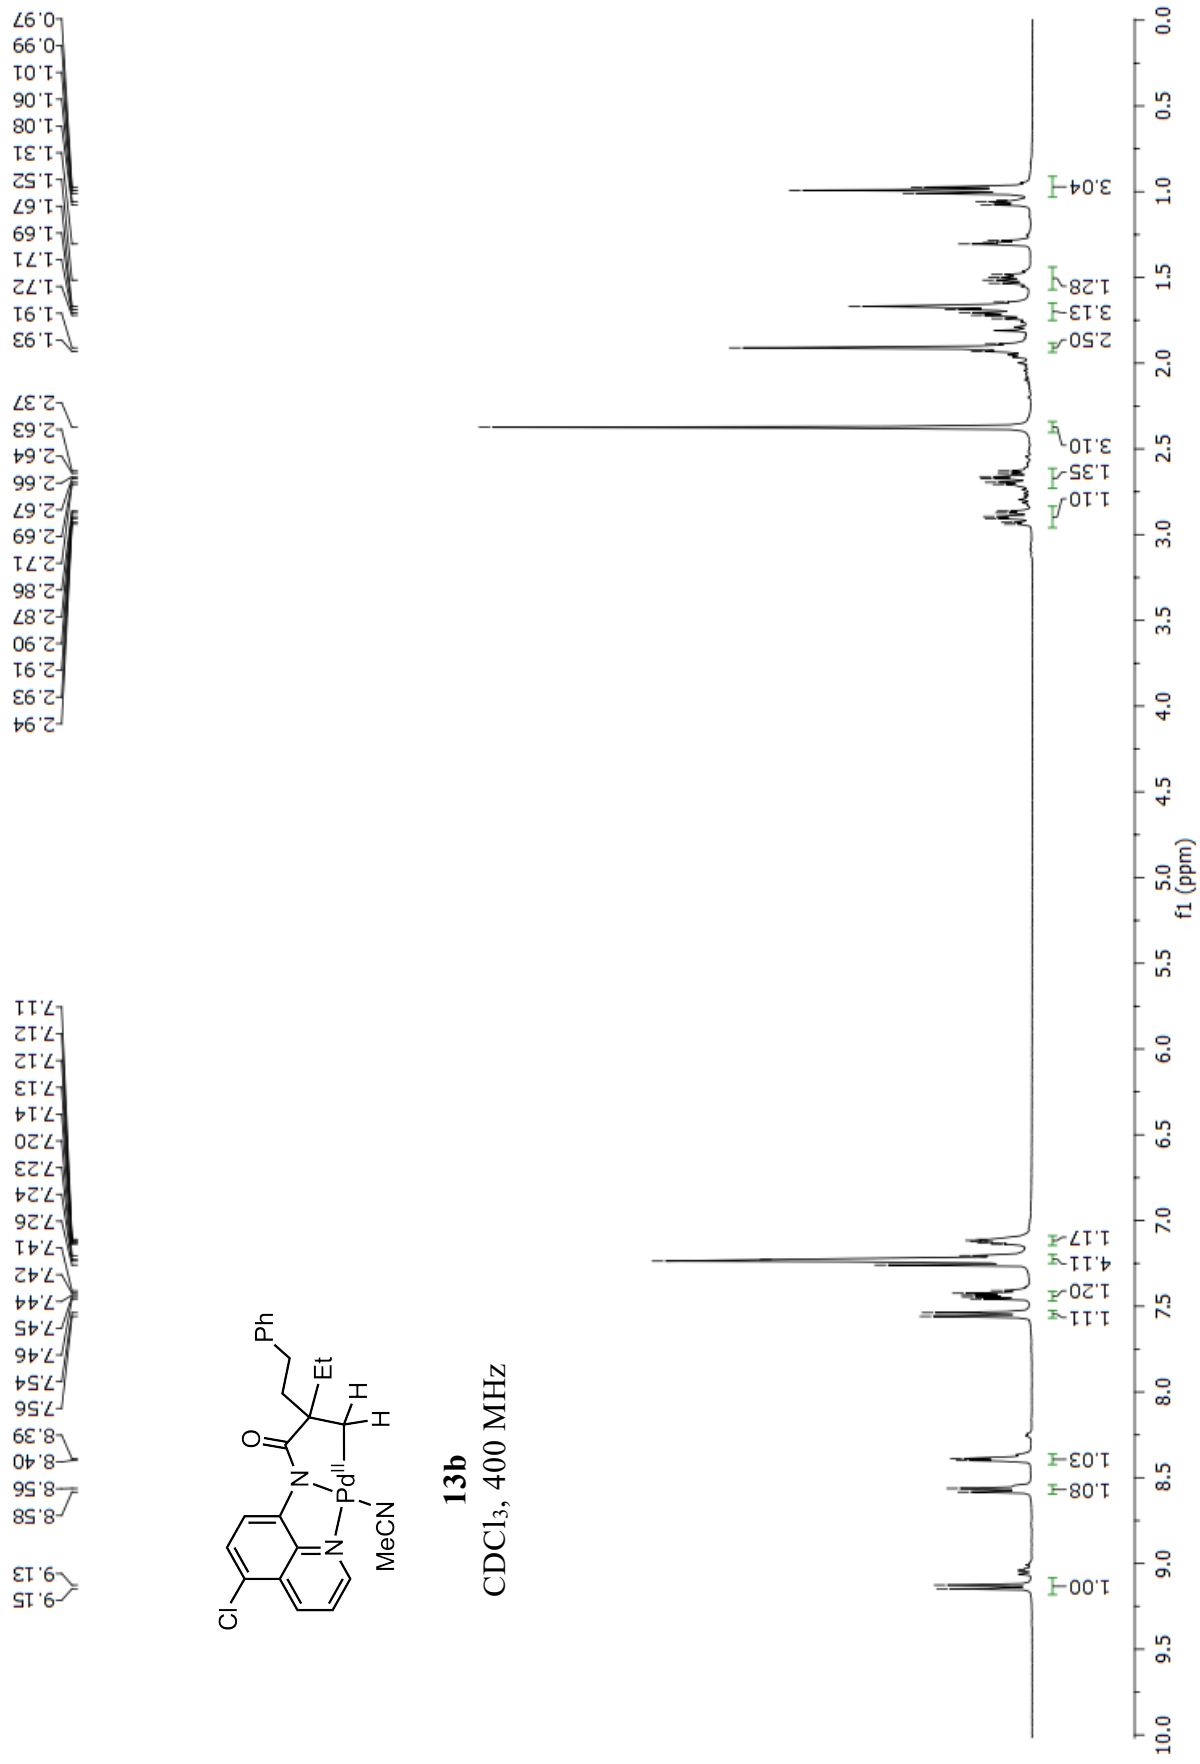



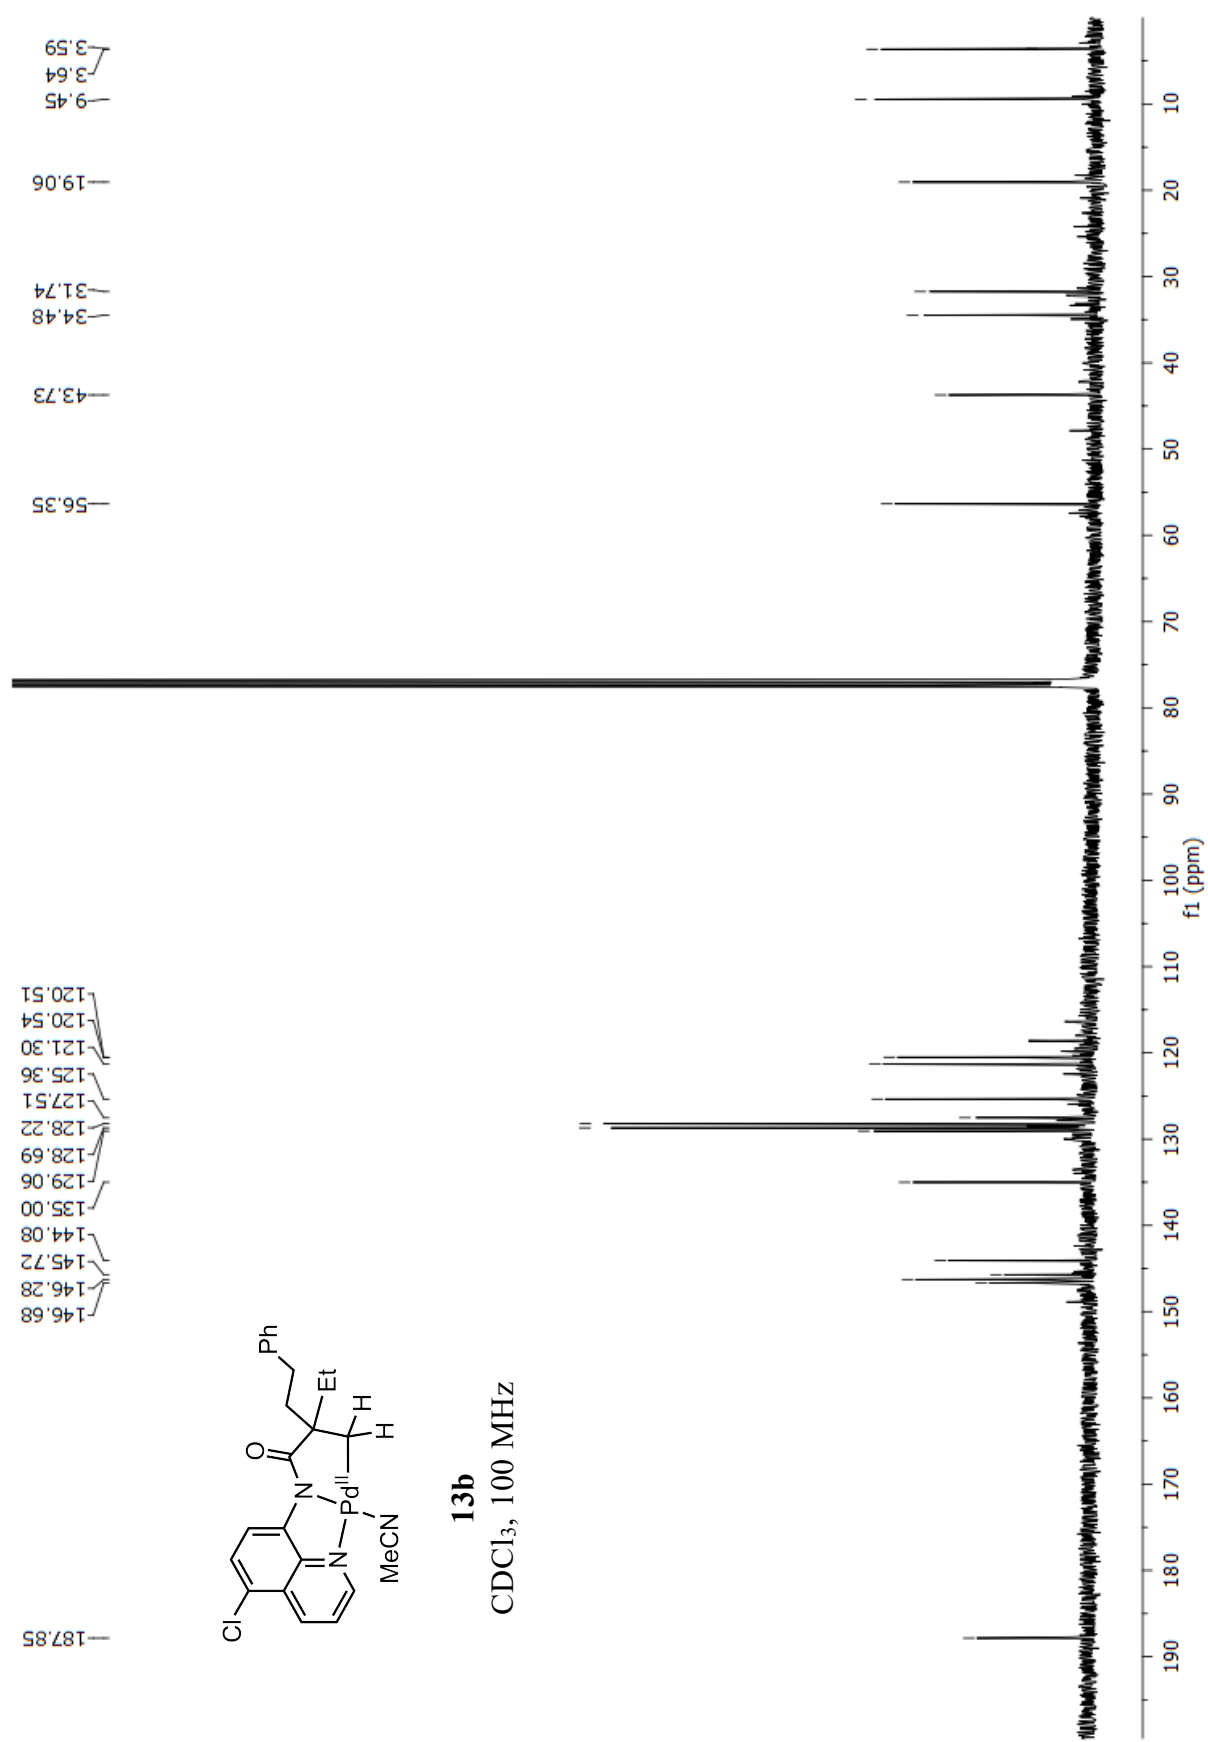

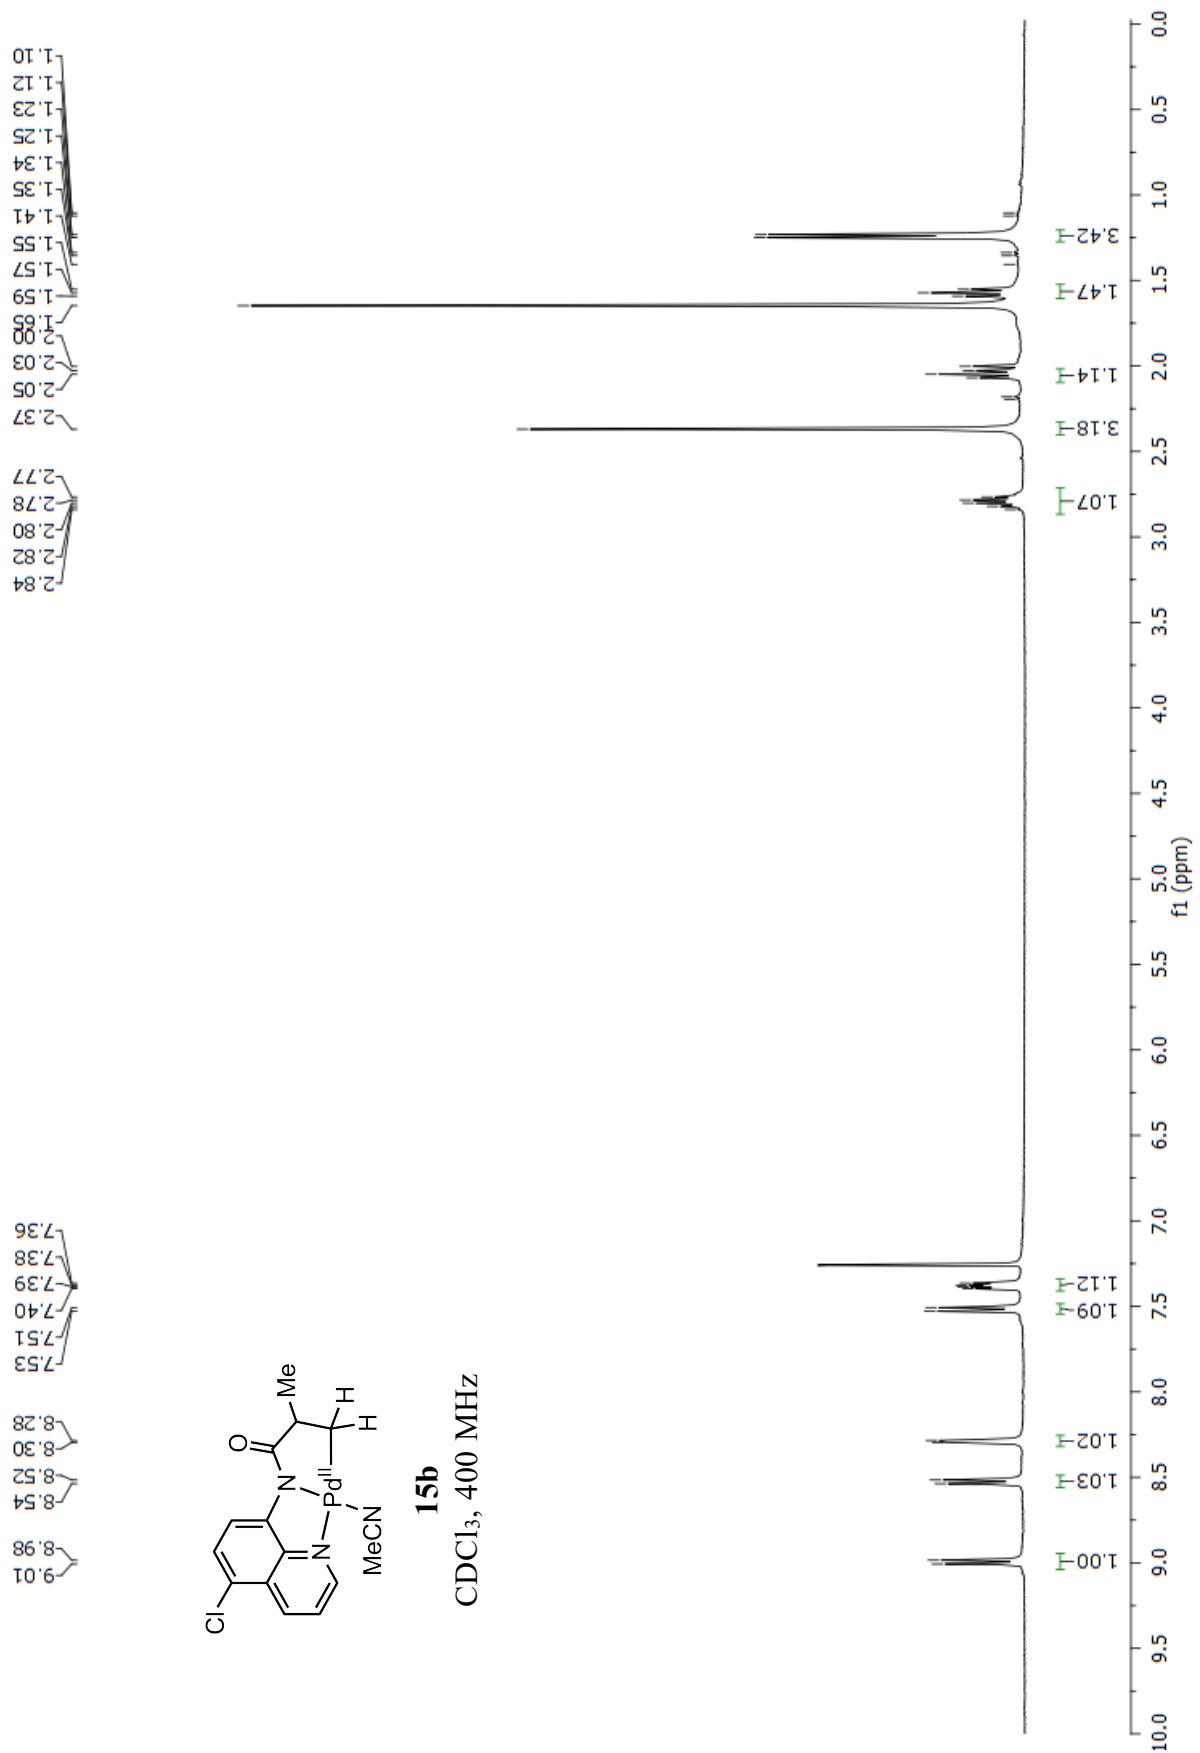

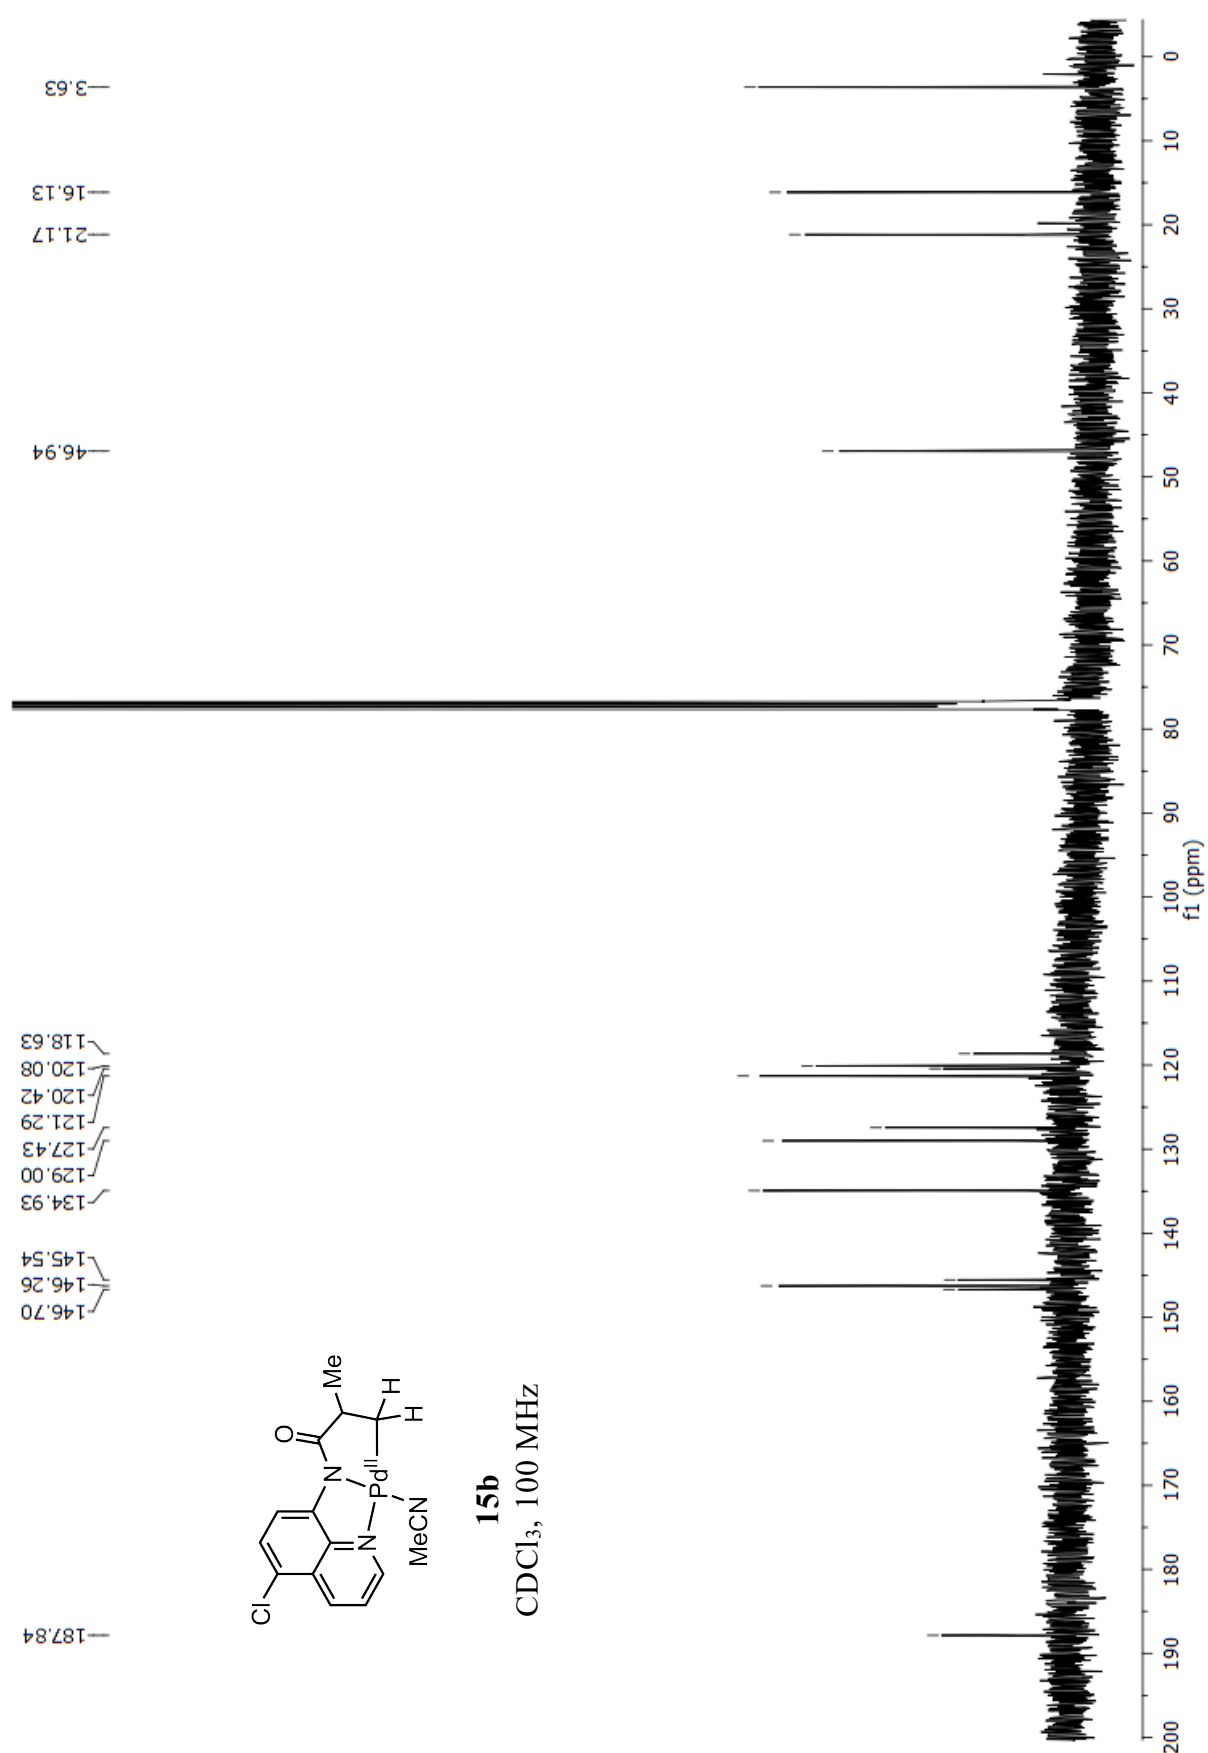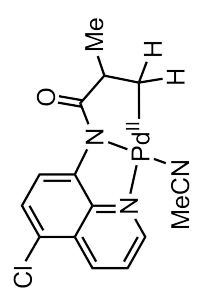

**15b**  
CDCl<sub>3</sub>, 100 MHz

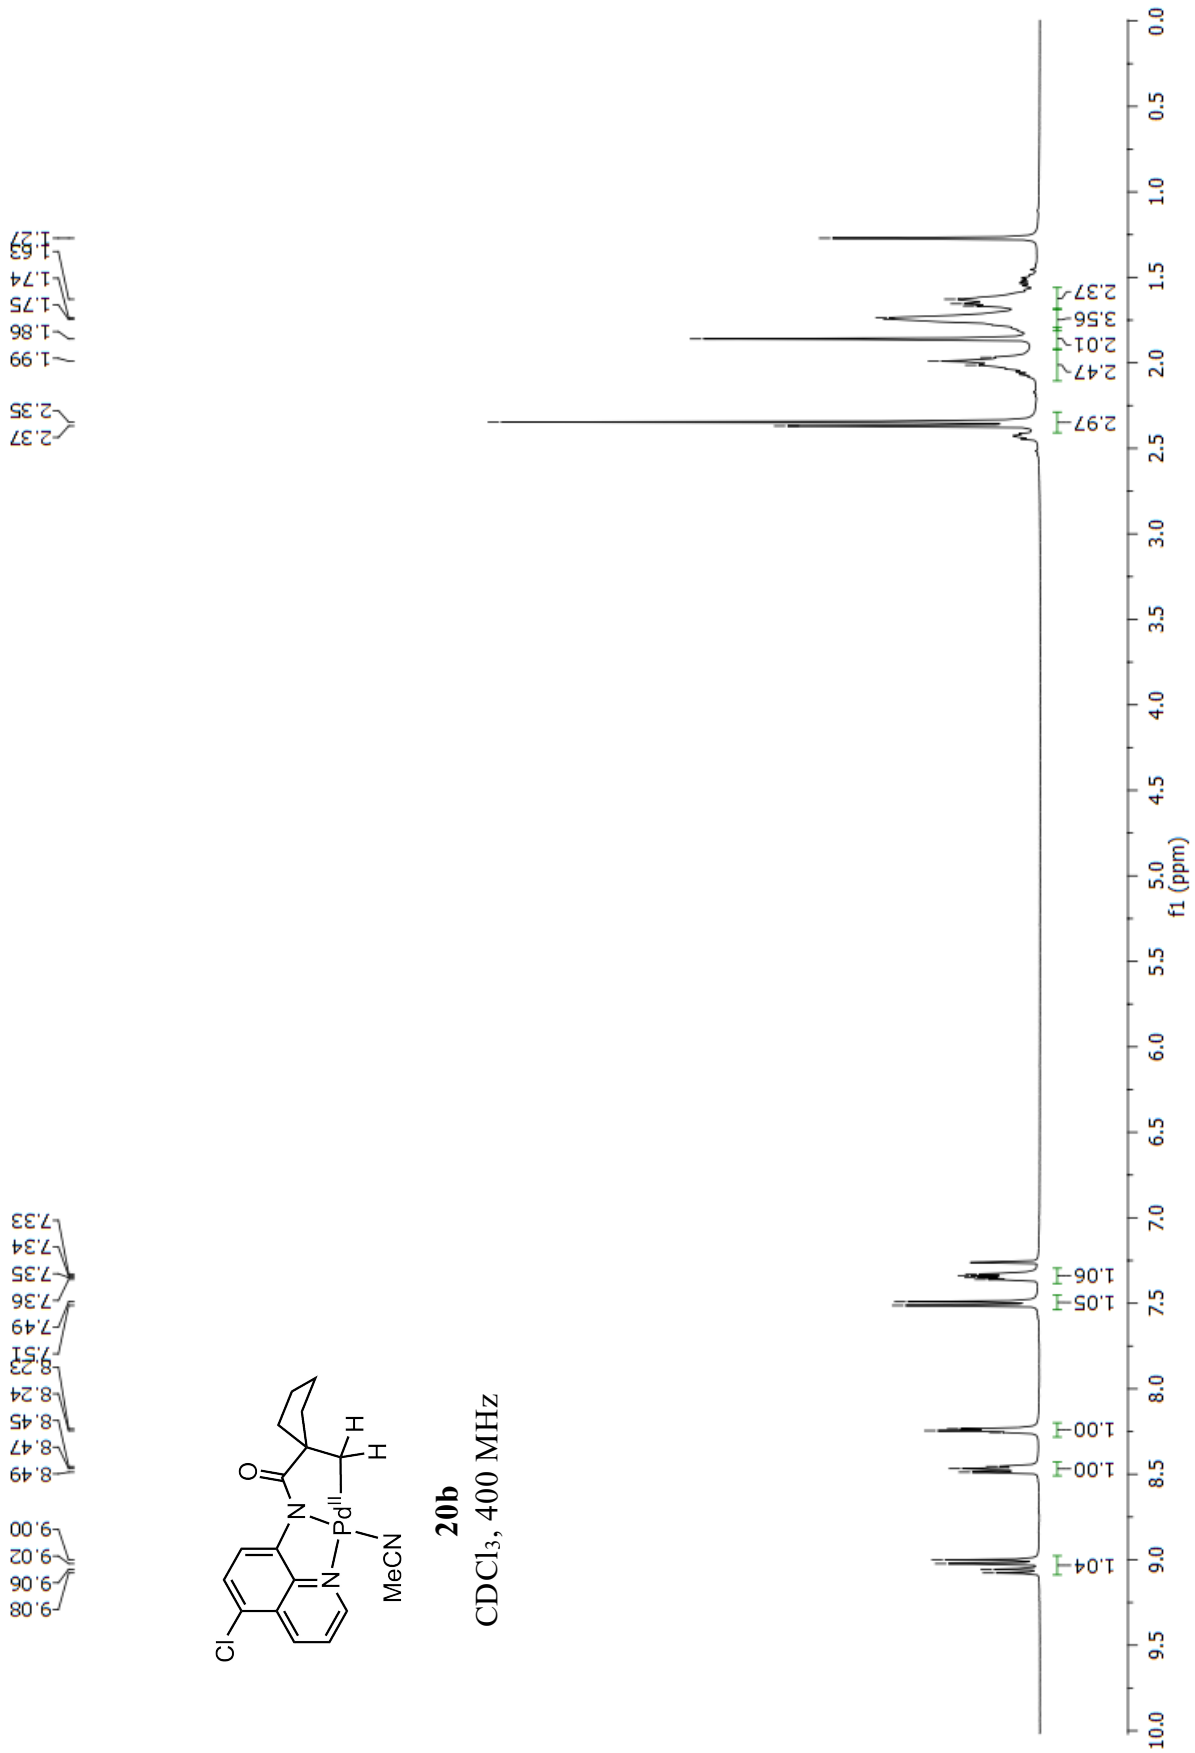

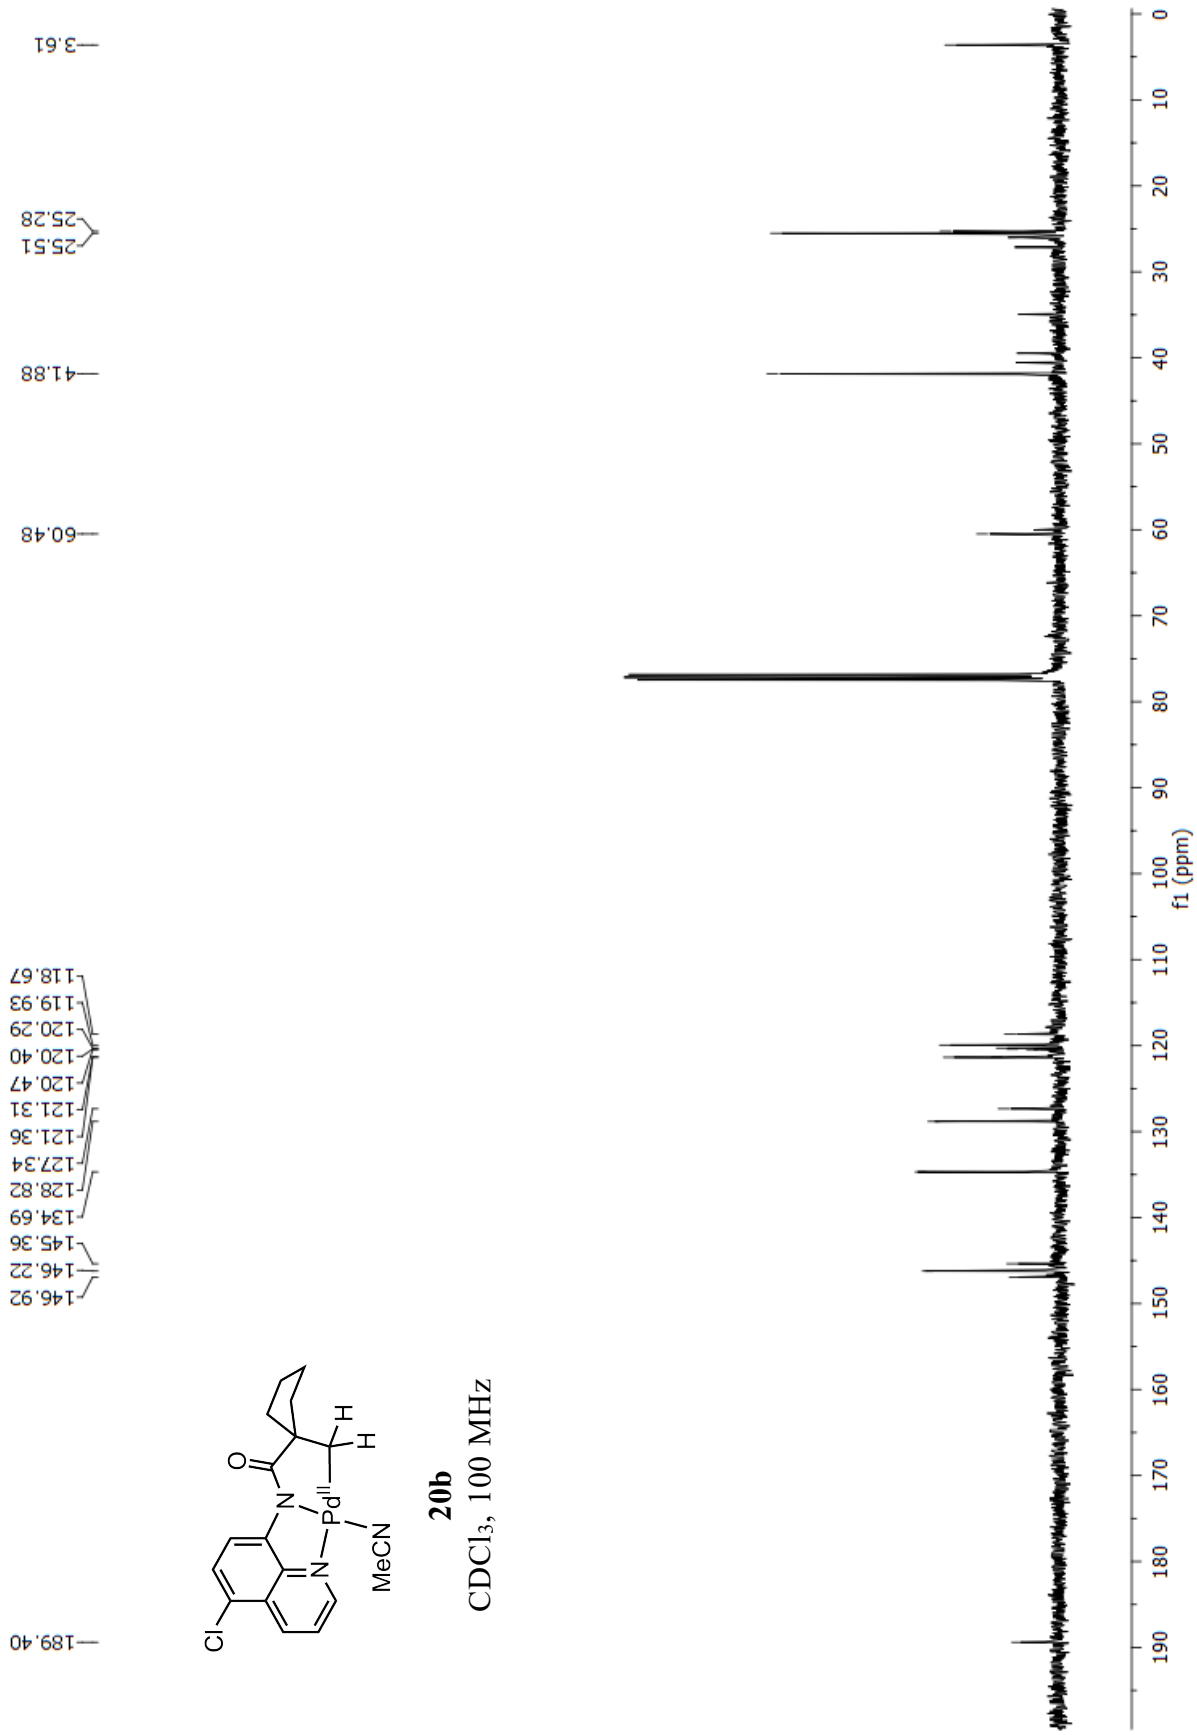

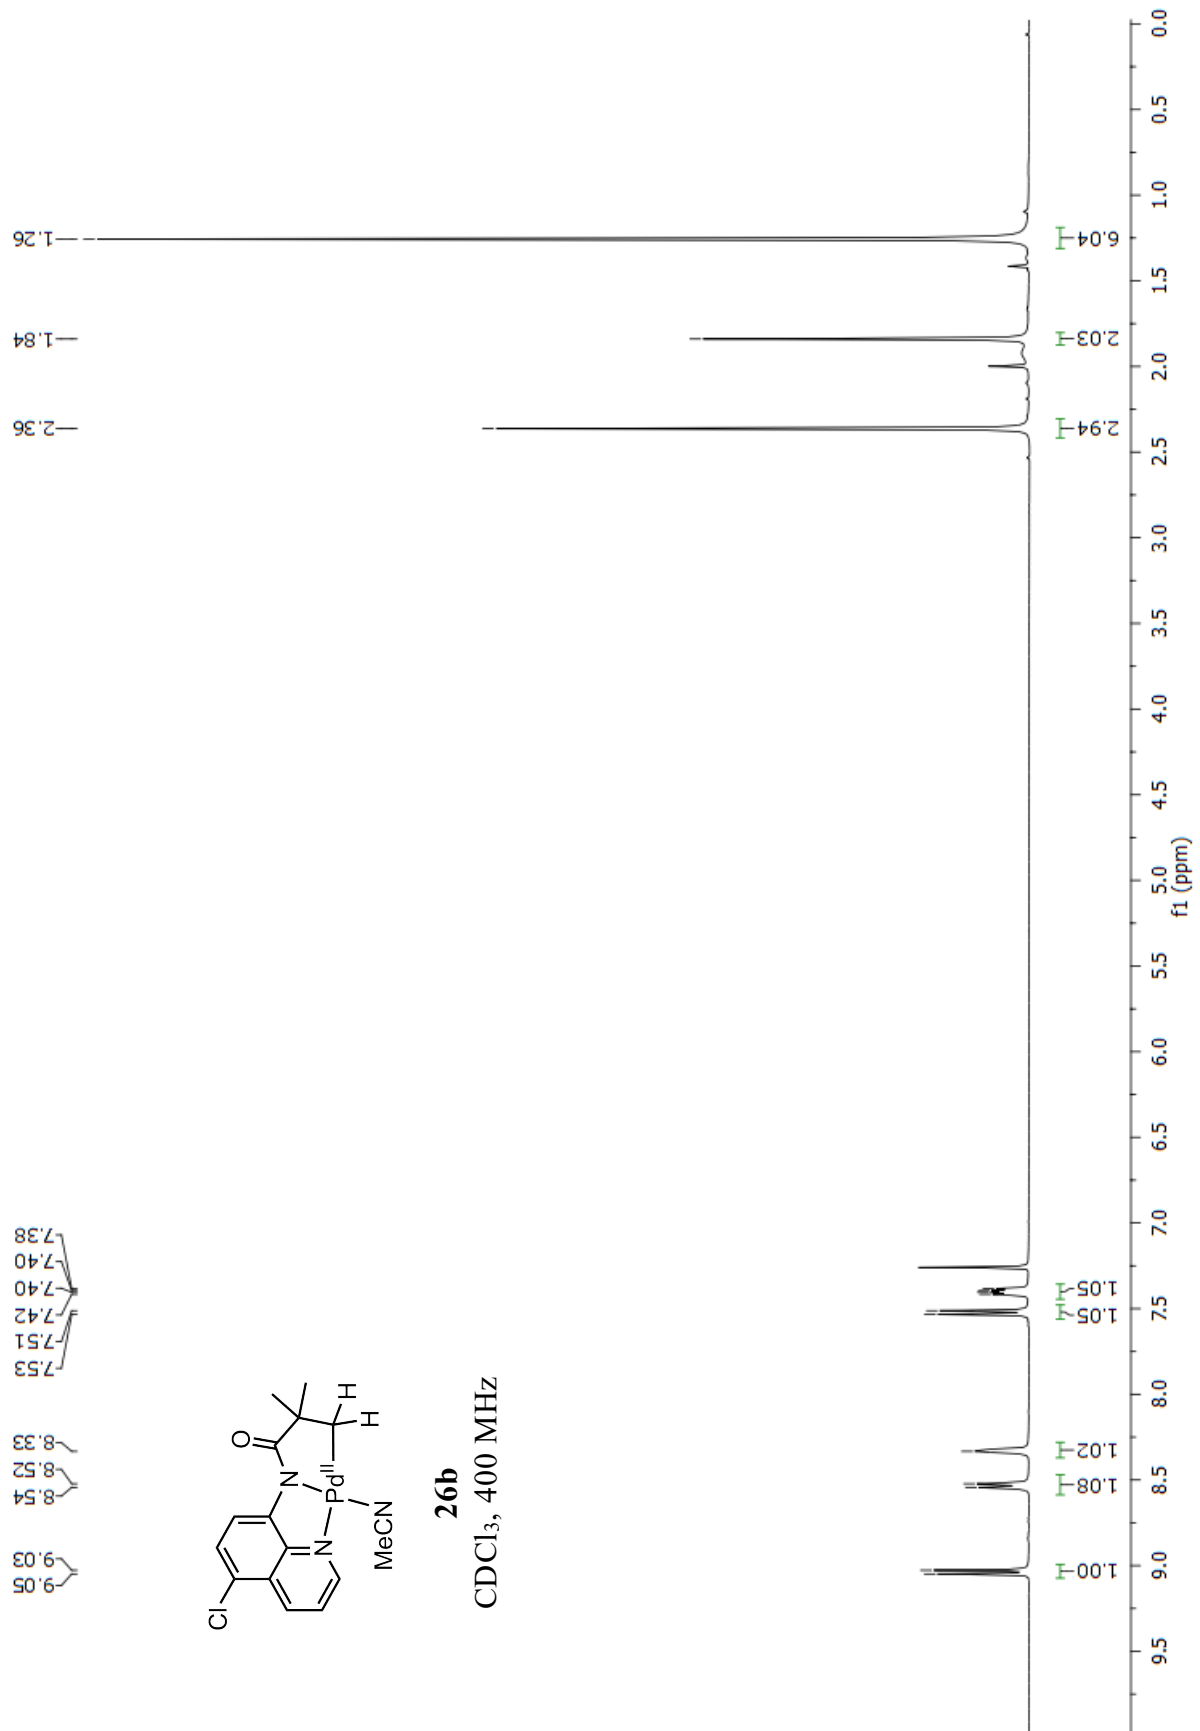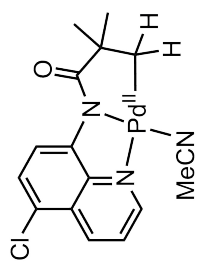

**26b**  
 $\text{CDCl}_3$ , 400 MHz

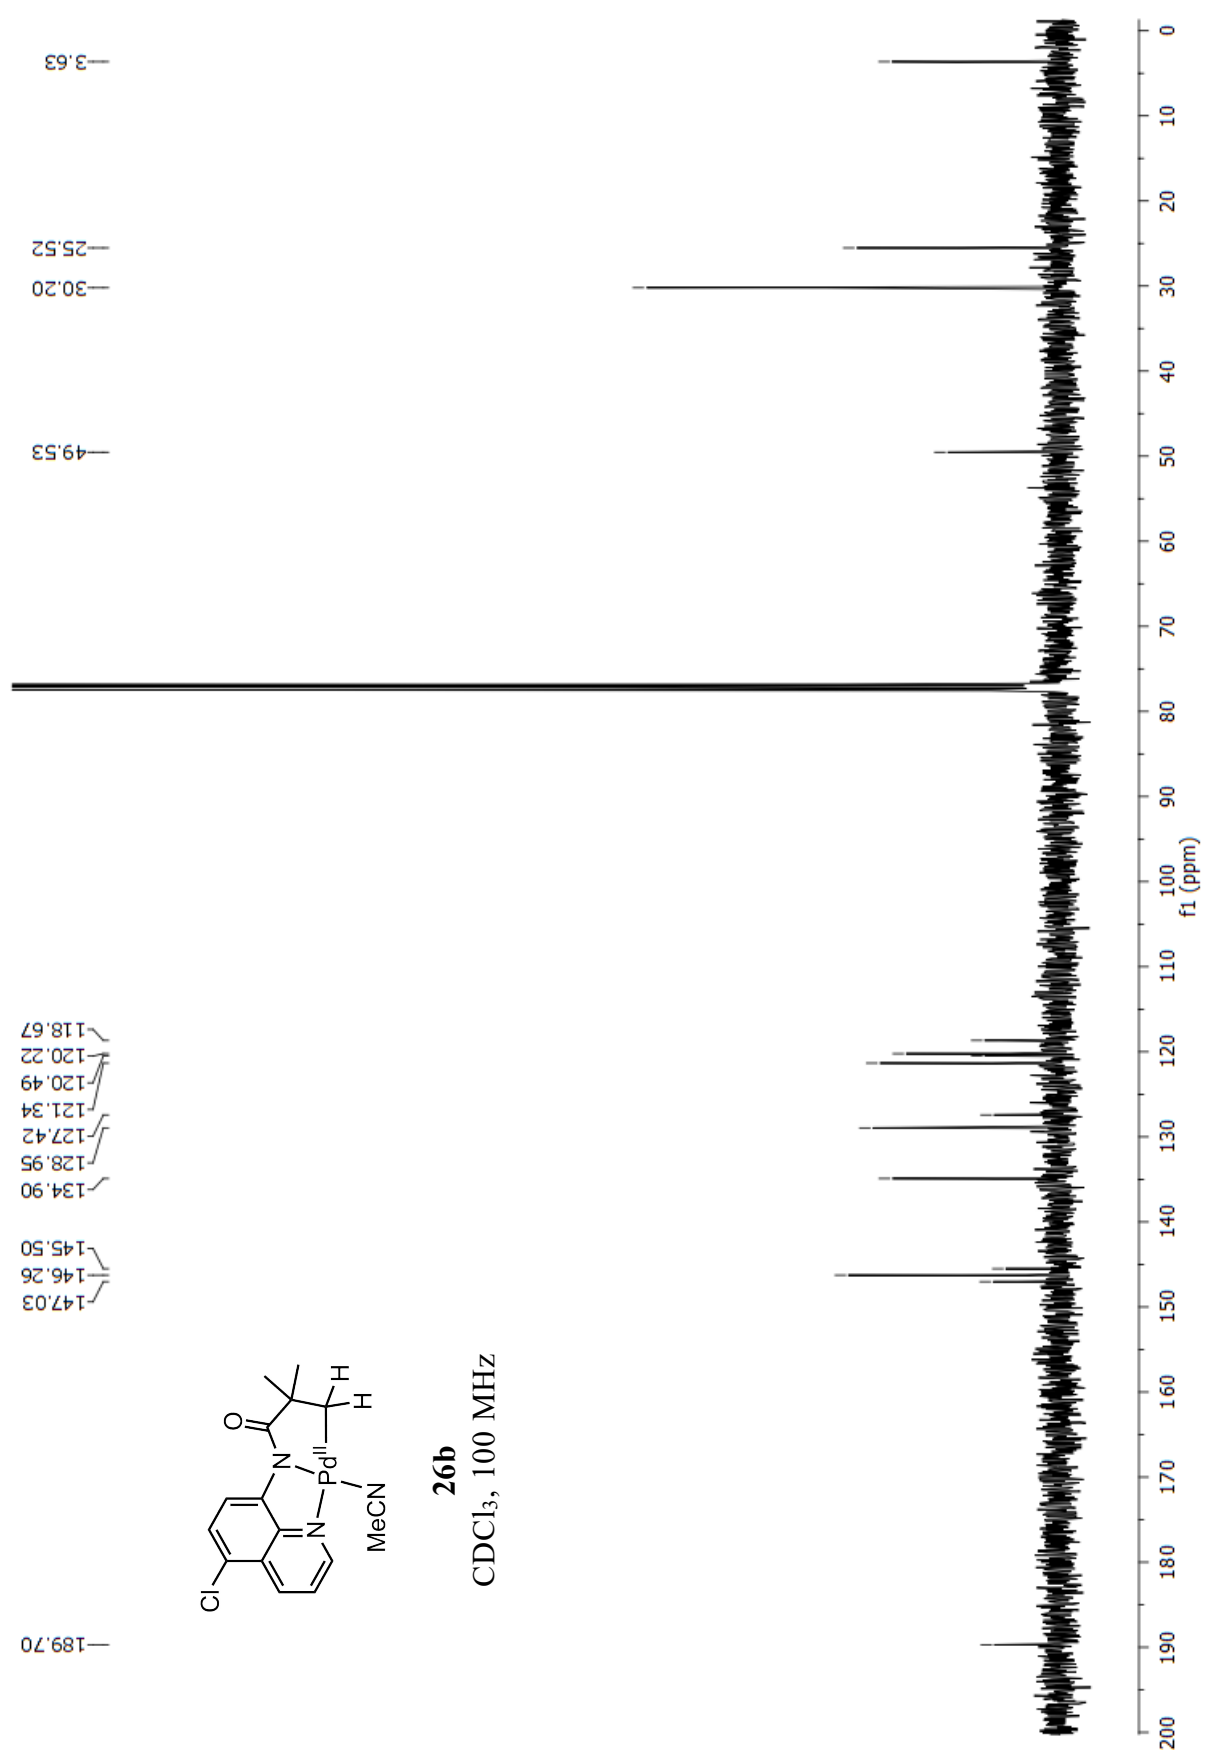

0.92  
 0.93  
 0.95  
 1.40  
 1.77  
 1.95  
 1.95  
 1.95  
 1.95  
 1.96  
 1.96  
 1.97  
 1.97  
 1.97  
 1.98  
 1.99  
 3.62

7.48  
 7.50  
 7.54  
 7.55  
 7.56  
 7.57  
 7.70  
 7.72  
 7.89  
 7.91  
 8.32  
 8.32  
 8.34  
 8.66  
 8.67  
 9.14  
 9.16

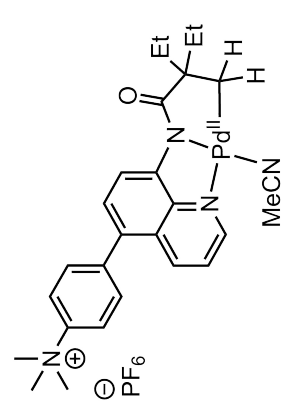

**4**  
 CD<sub>3</sub>CN, 400 MHz

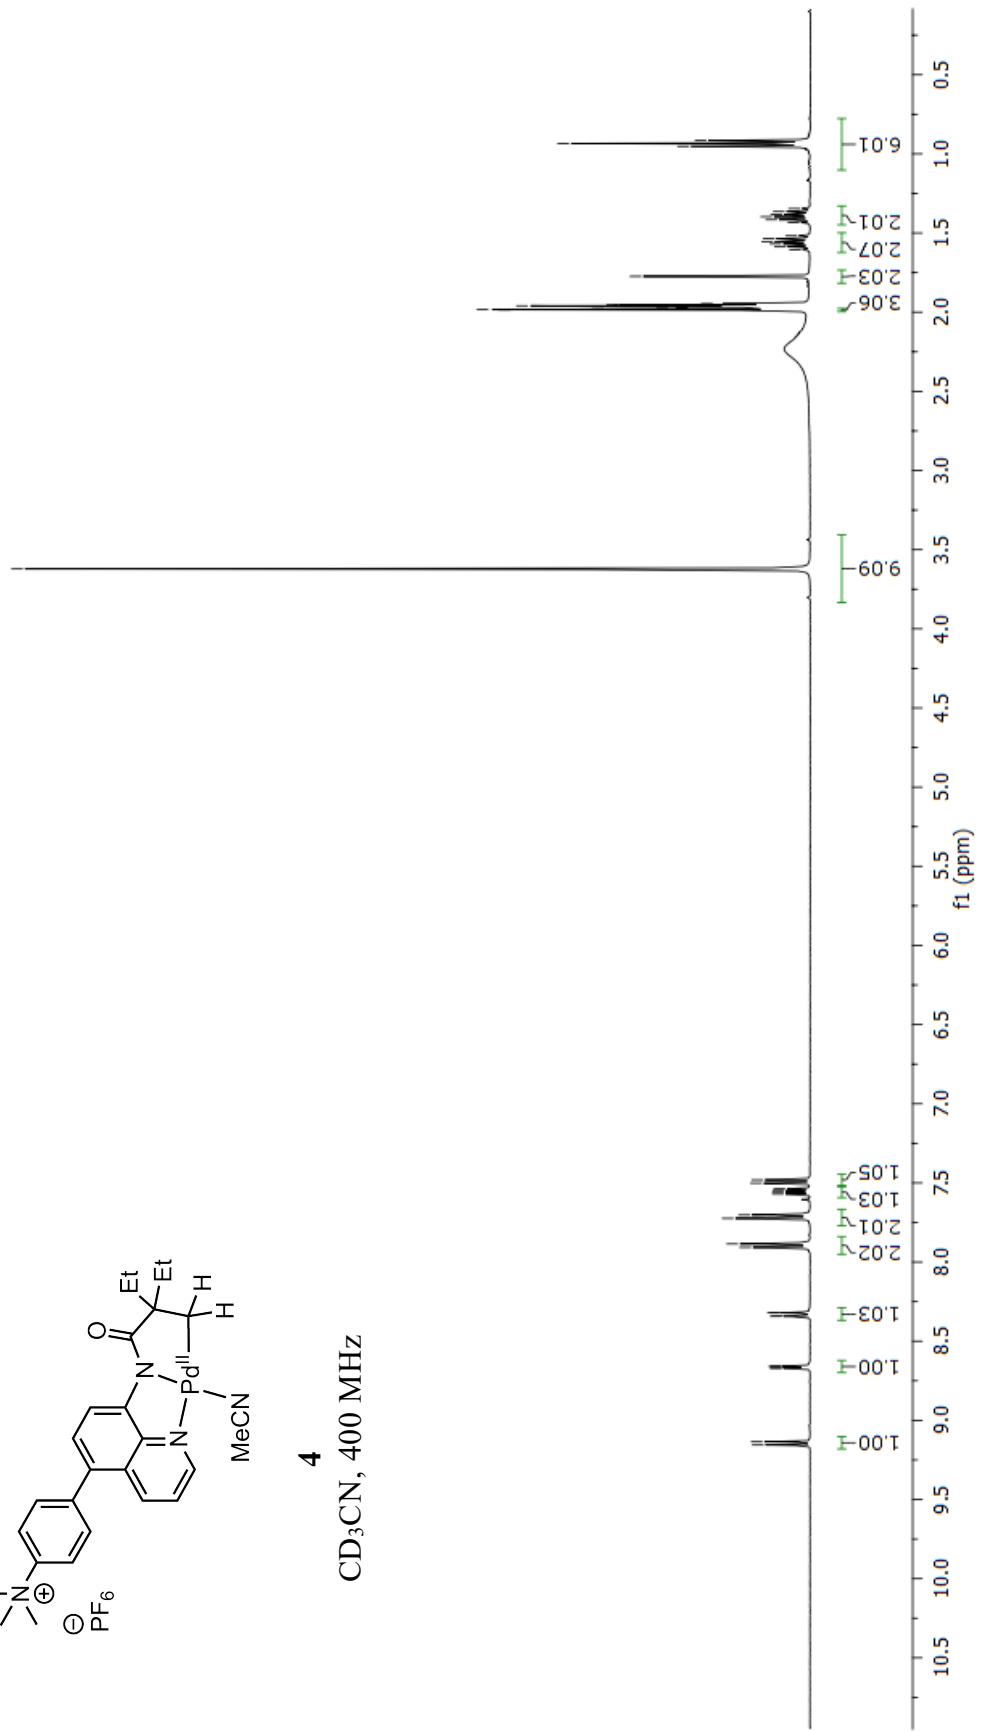



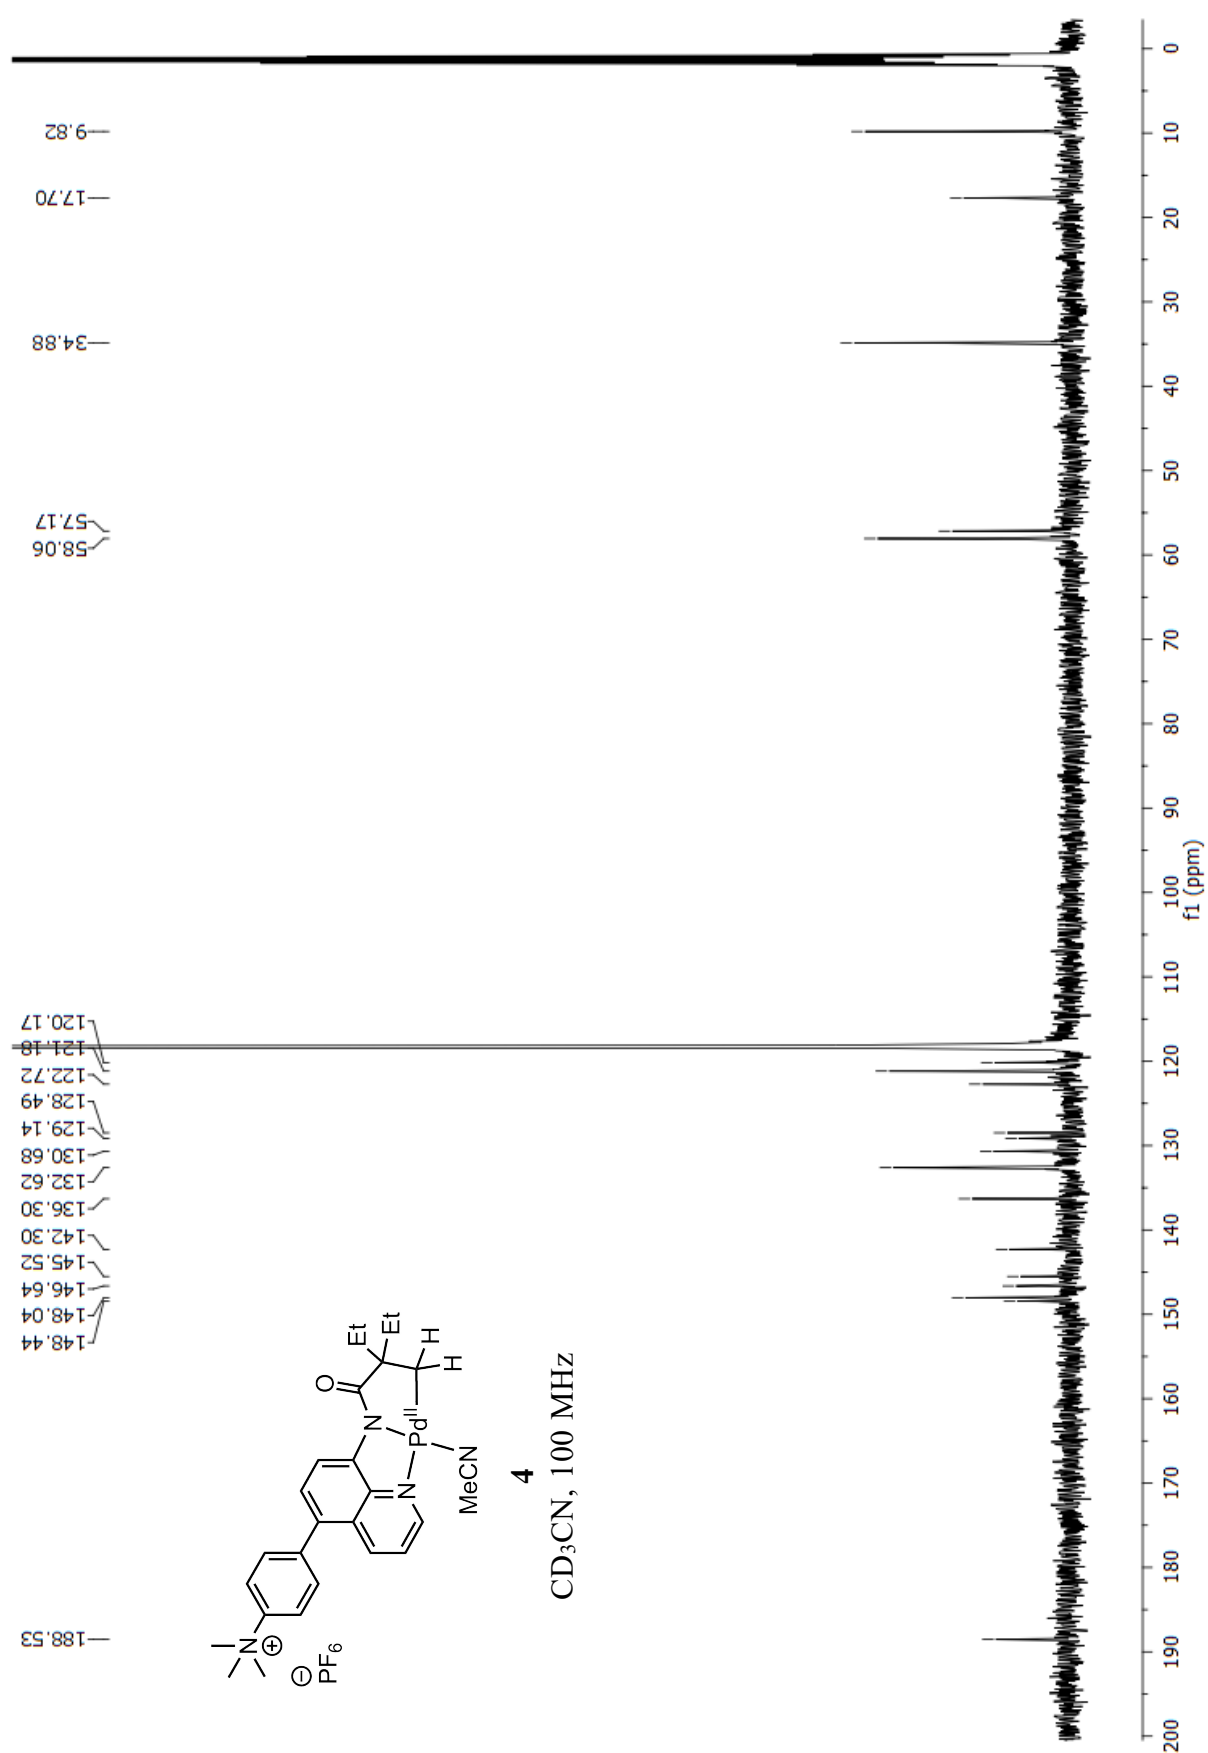

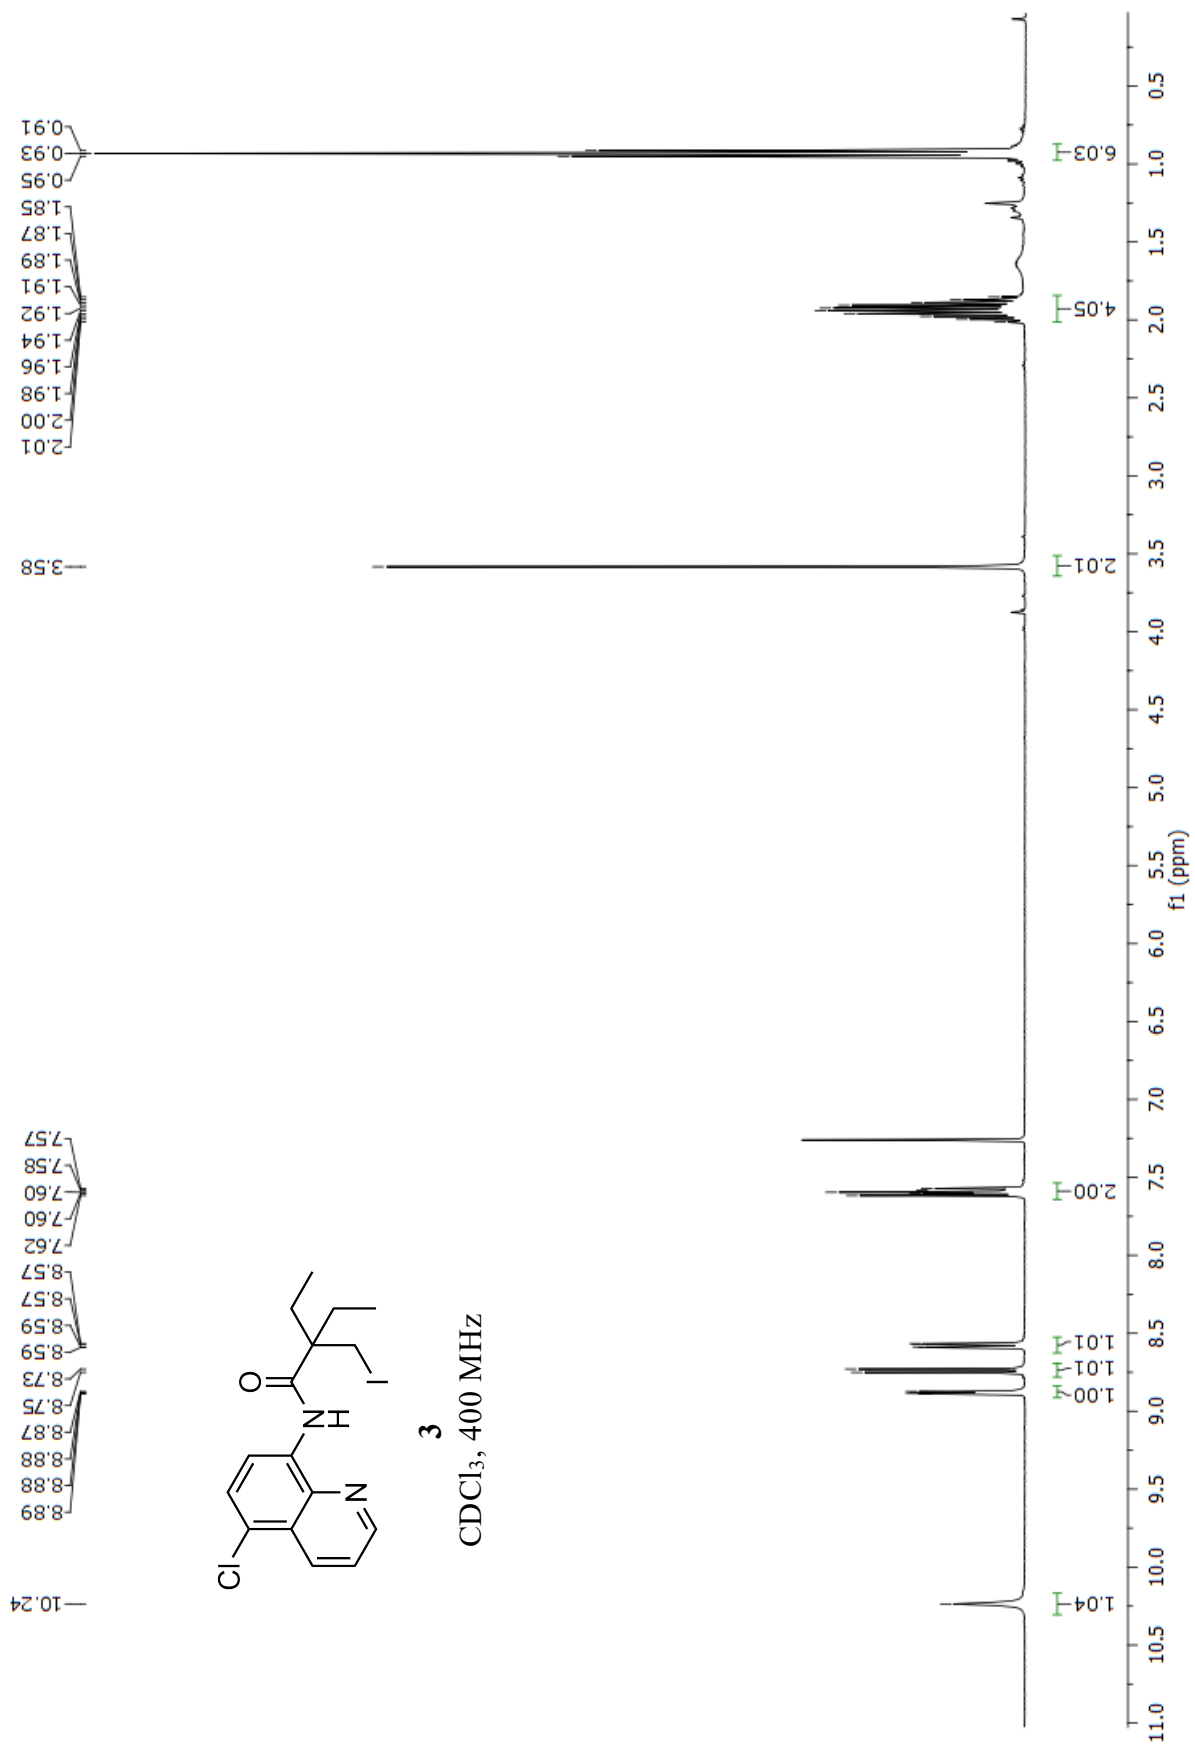

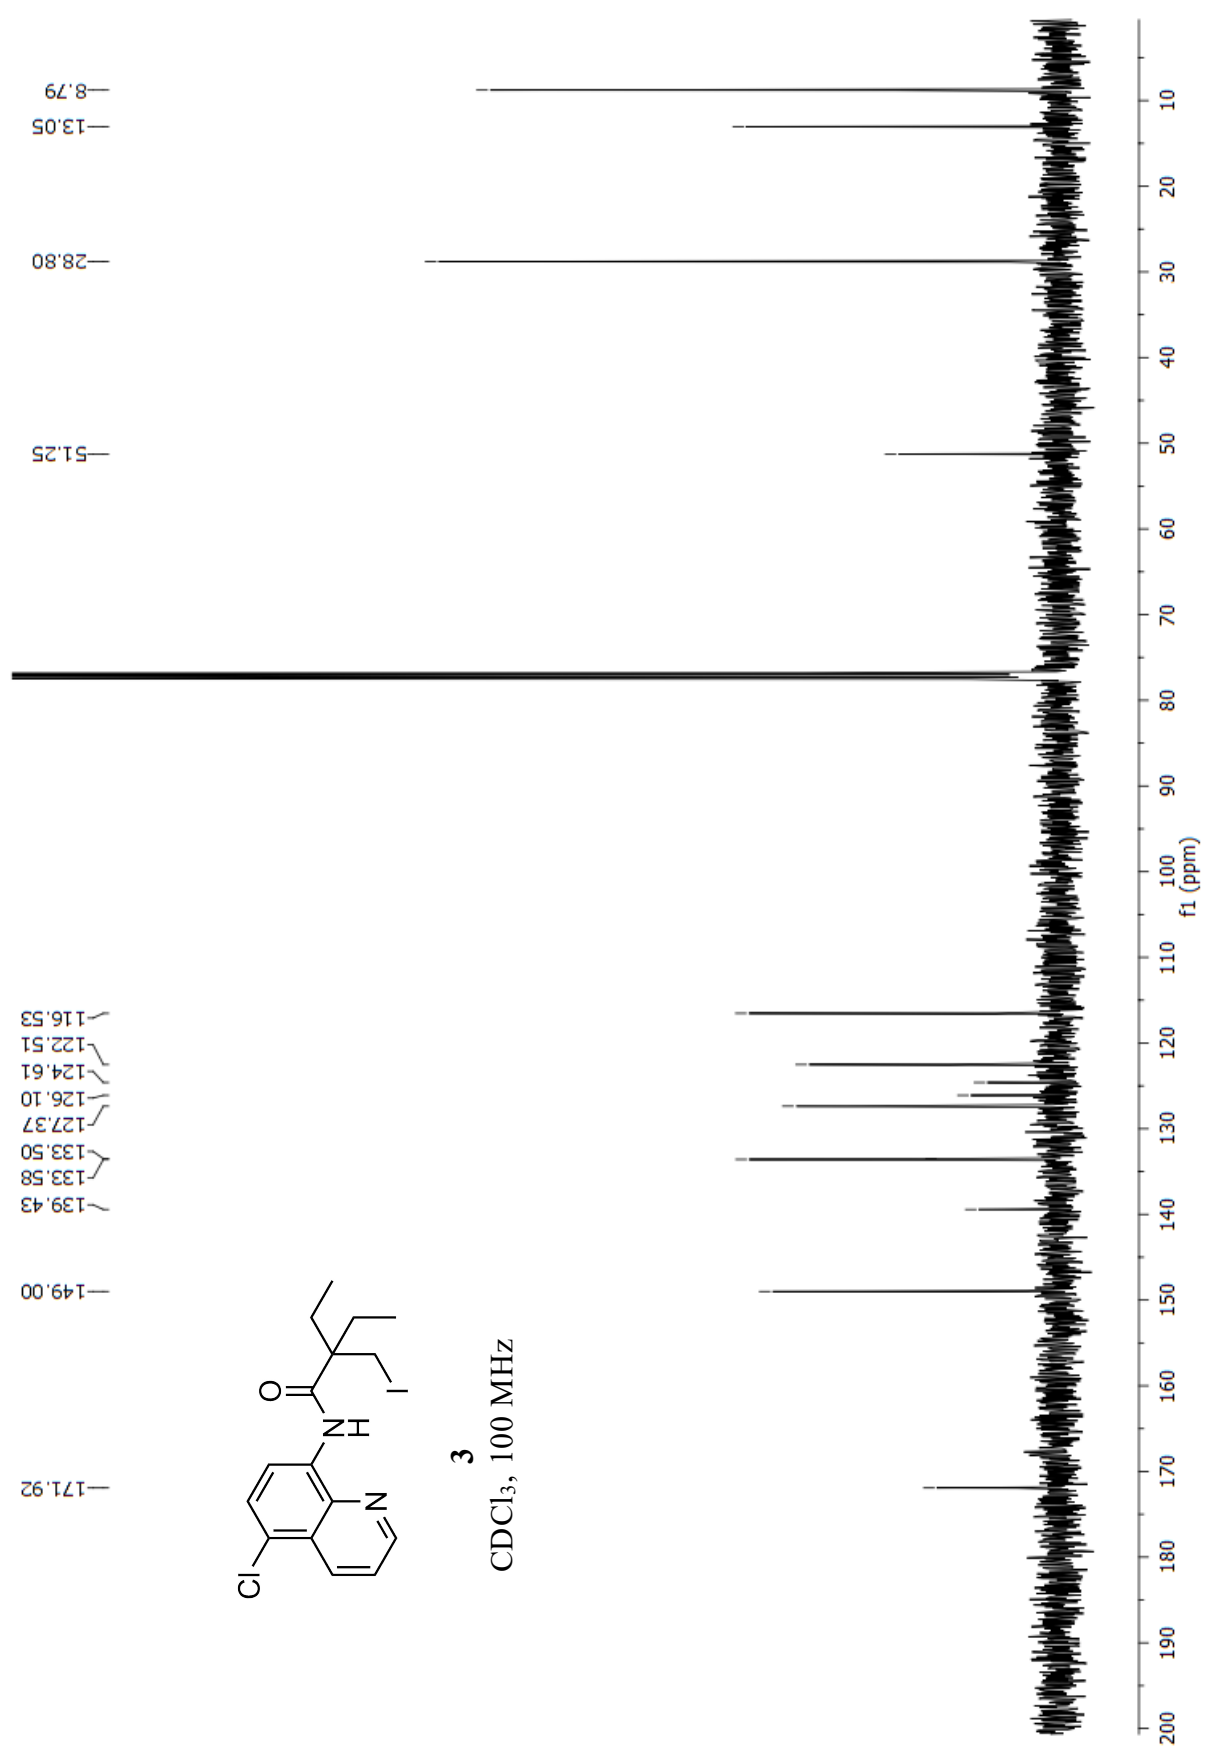

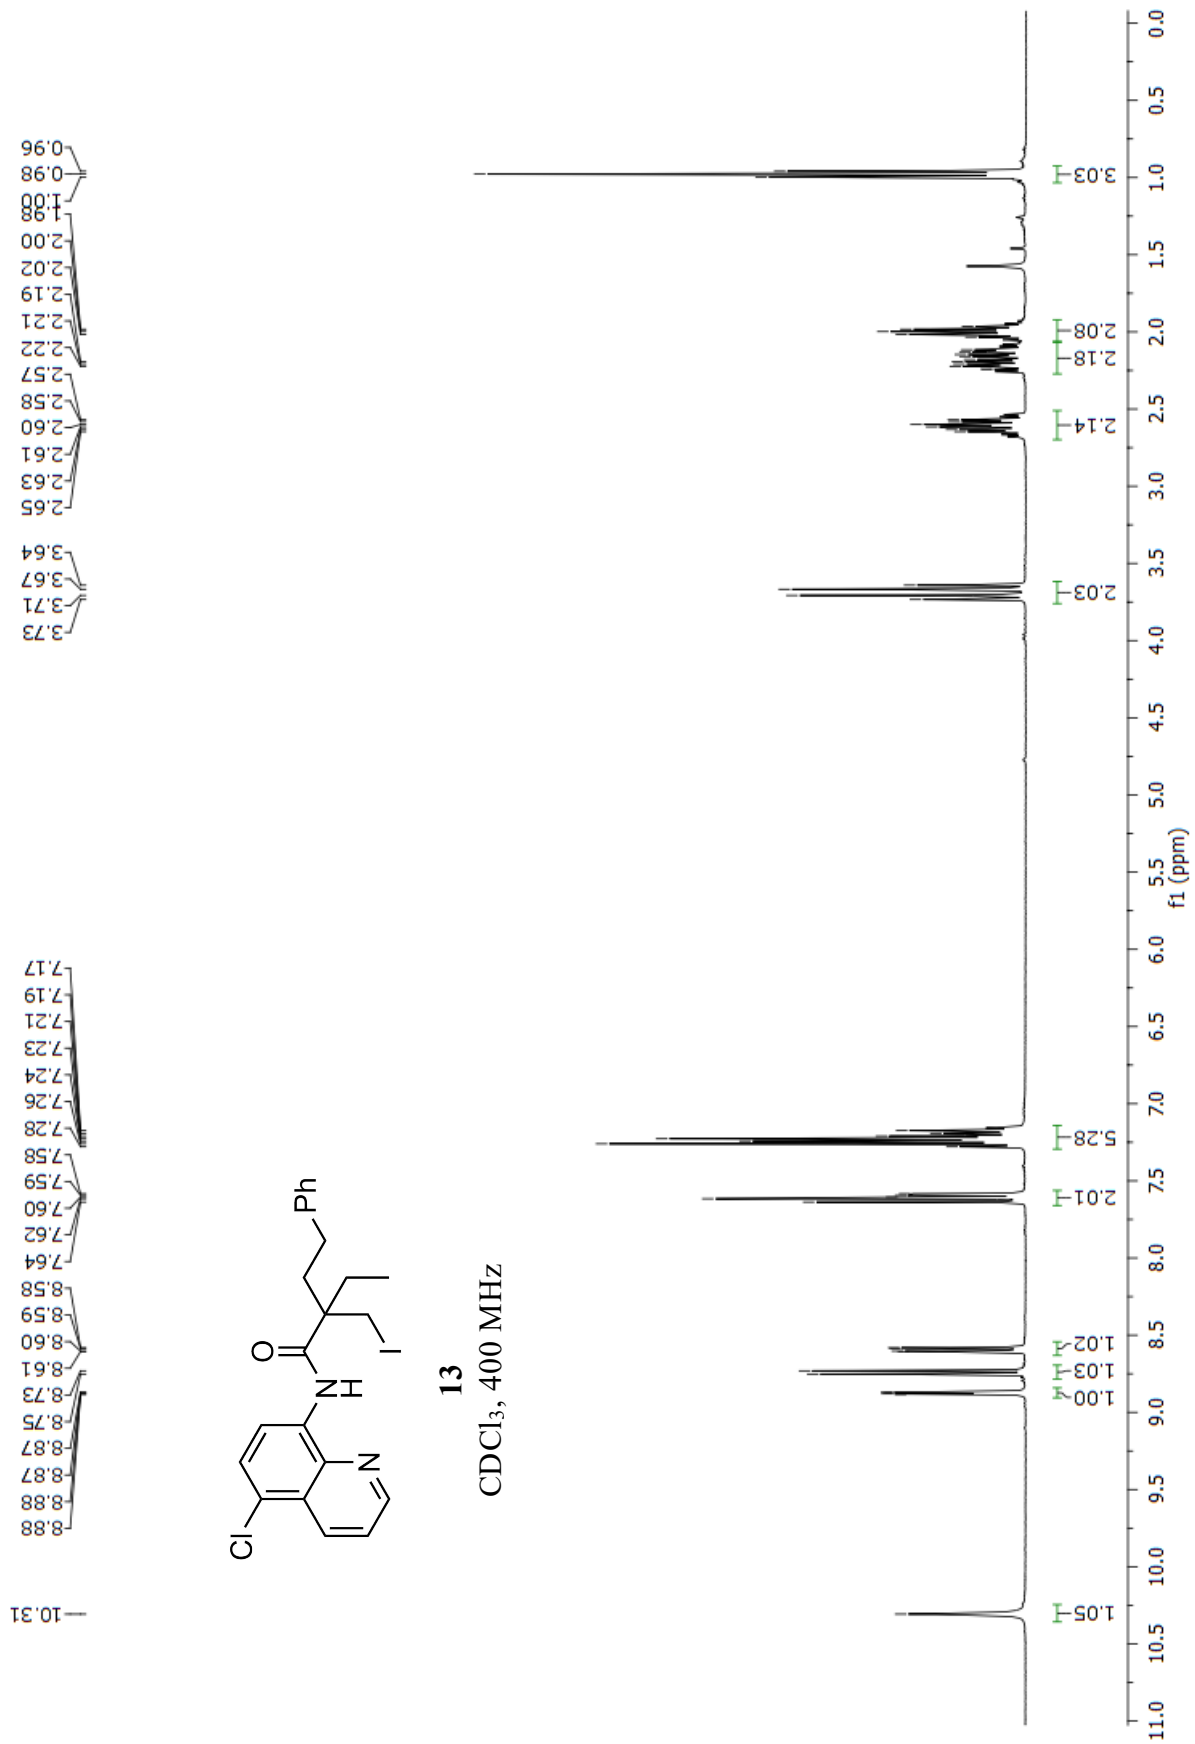

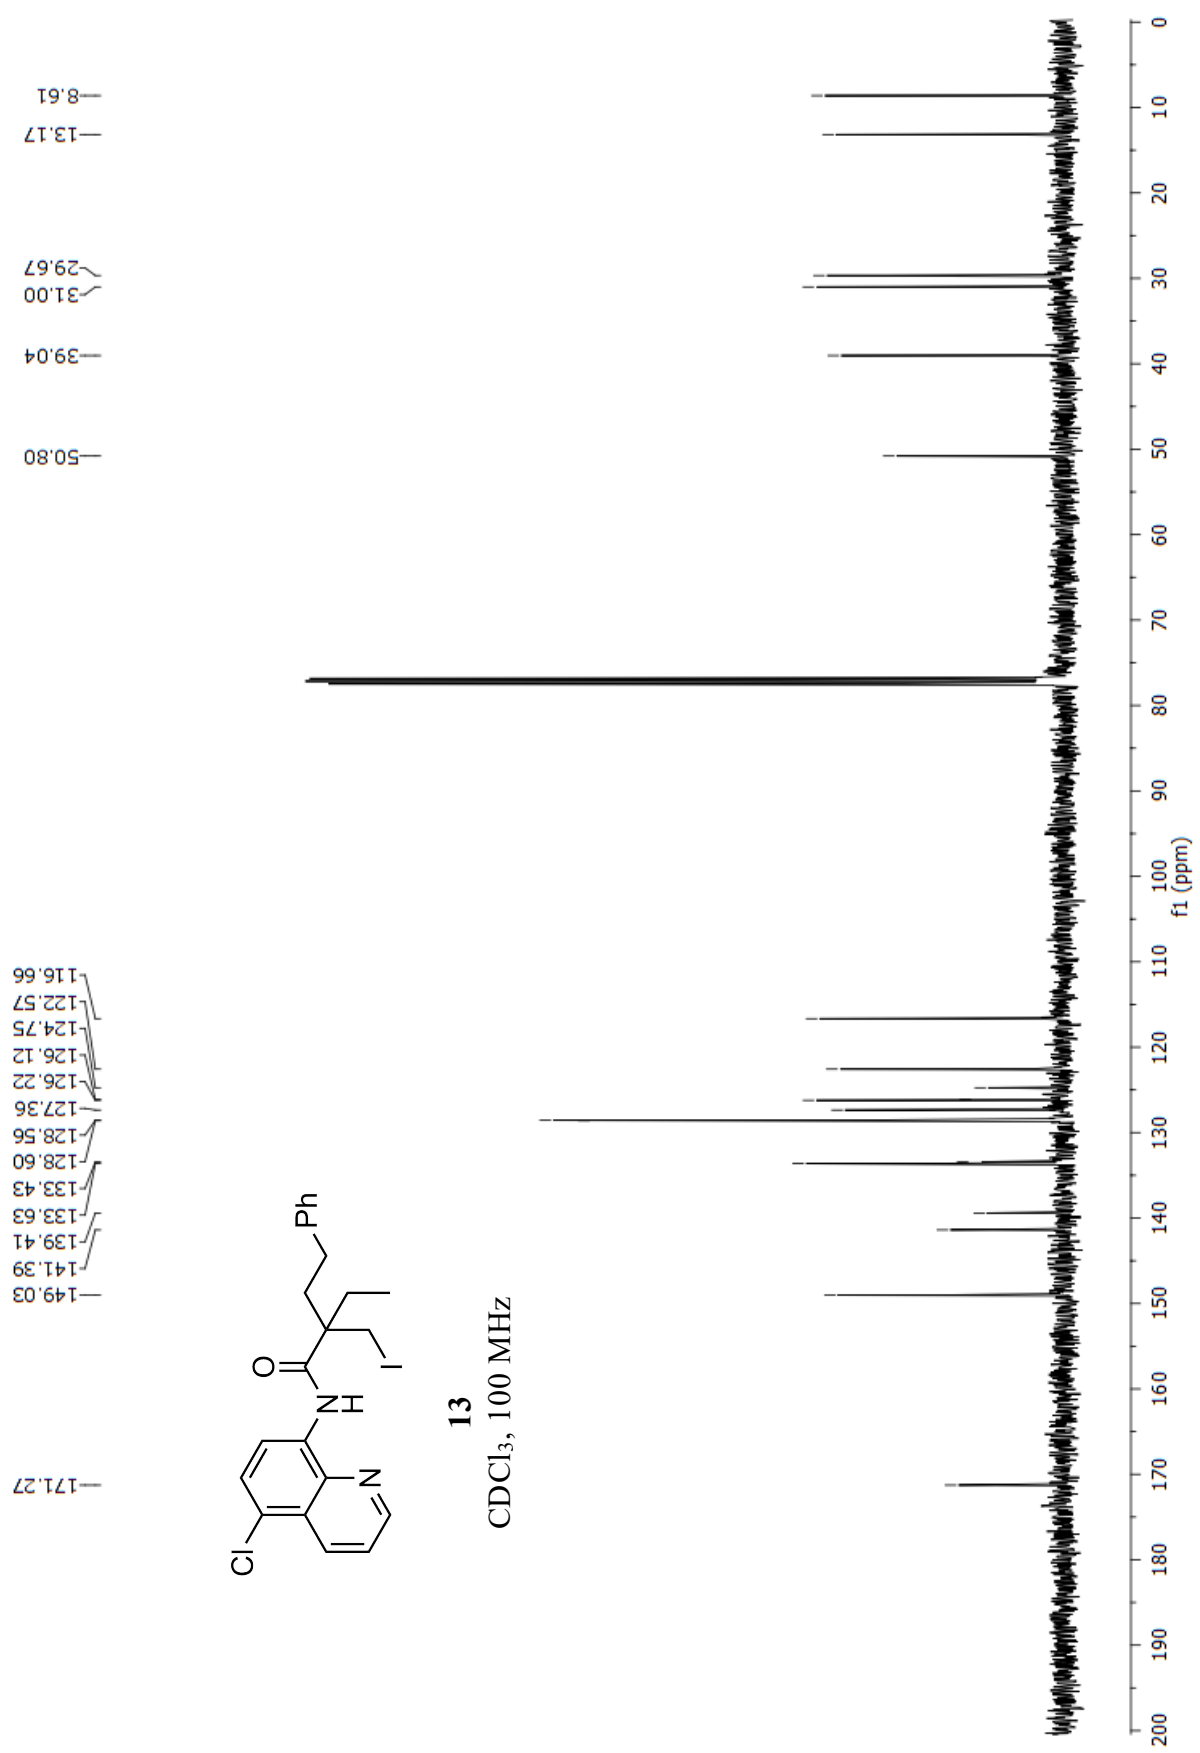

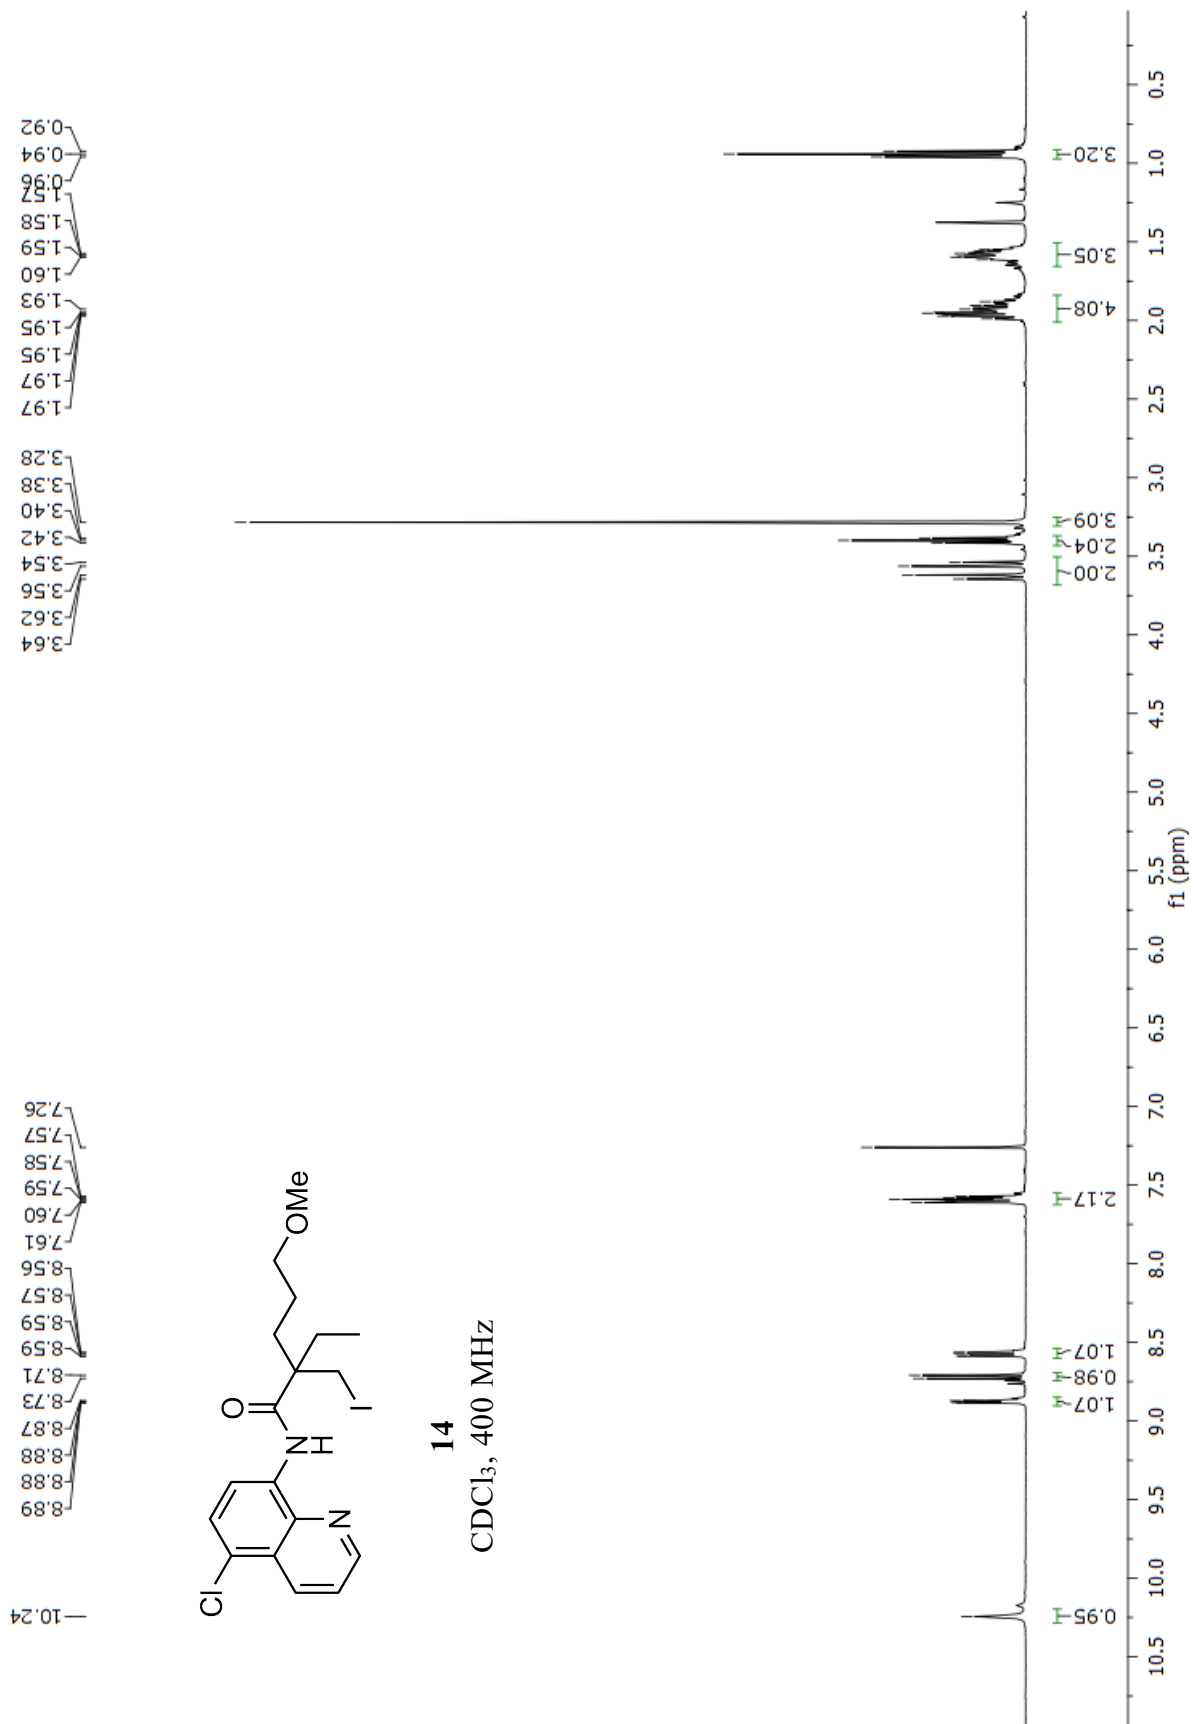

8.58  
 13.17  
 24.65  
 29.13  
 32.82  
 50.66  
 58.63  
 72.57  
 116.61  
 122.52  
 124.68  
 126.10  
 127.35  
 133.45  
 133.60  
 139.41  
 149.00  
 171.68

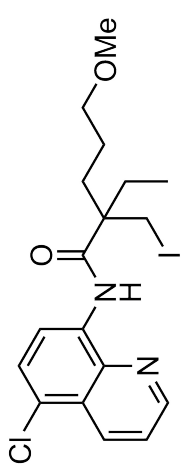

**14**  
 CDCl<sub>3</sub>, 100 MHz

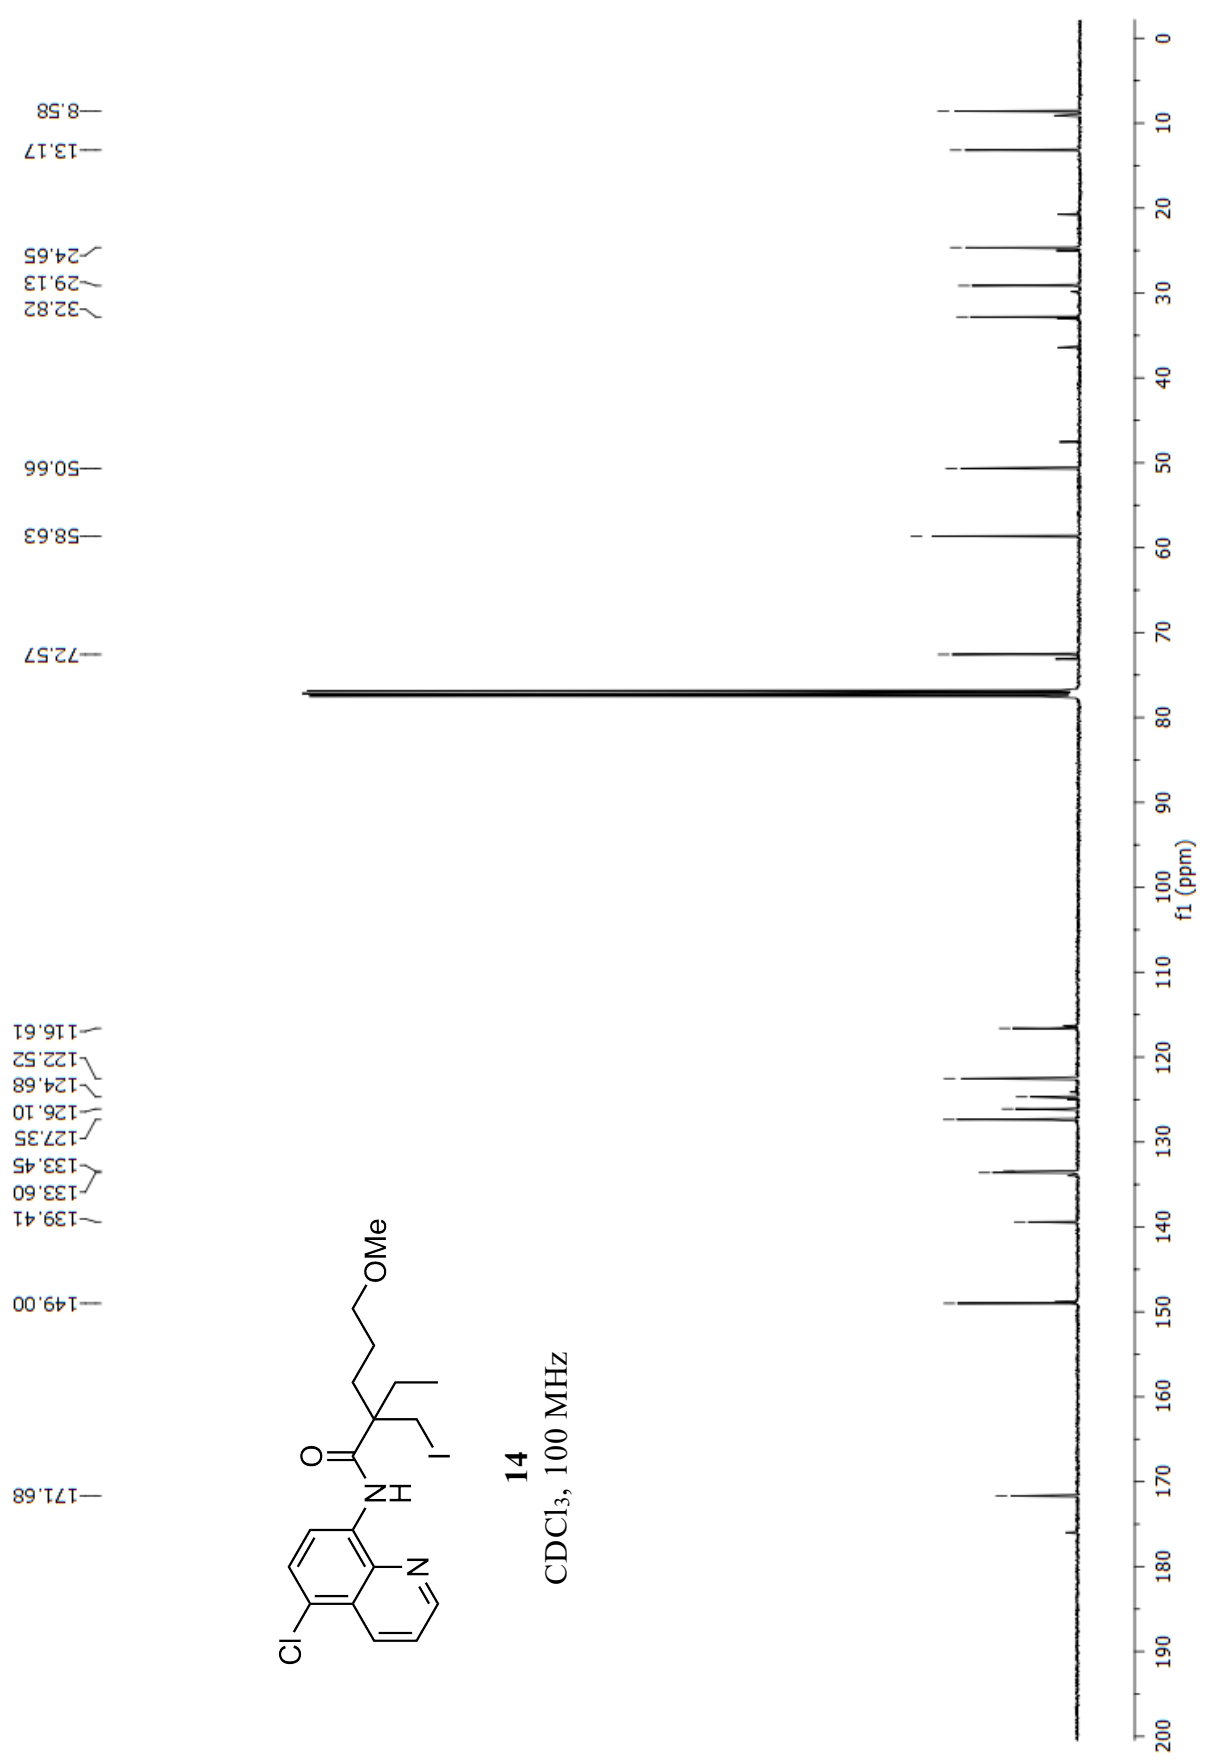

3.59  
3.58  
3.57  
3.55  
3.35  
3.33  
3.33  
3.31  
3.02  
3.00  
2.98  
2.96  
1.48  
1.46

9.89  
8.87  
8.87  
8.86  
8.86  
8.86  
8.75  
8.73  
8.59  
8.59  
8.57  
8.57  
7.62  
7.60  
7.60  
7.59  
7.58  
7.57

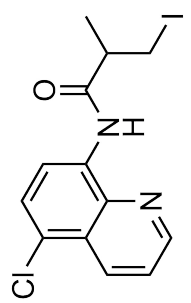

**15**

CDCl<sub>3</sub>, 400 MHz

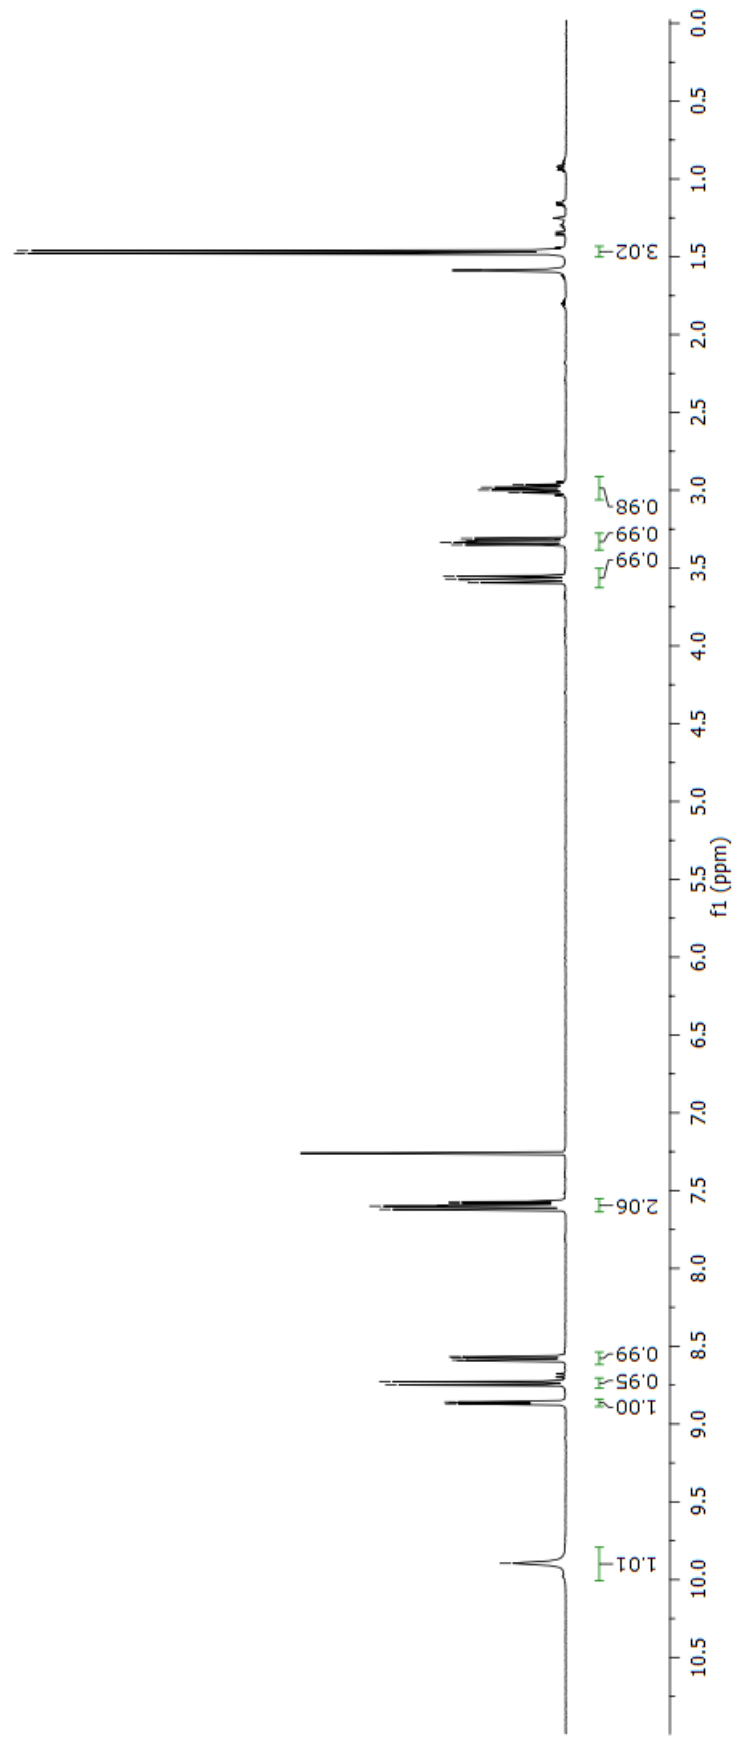



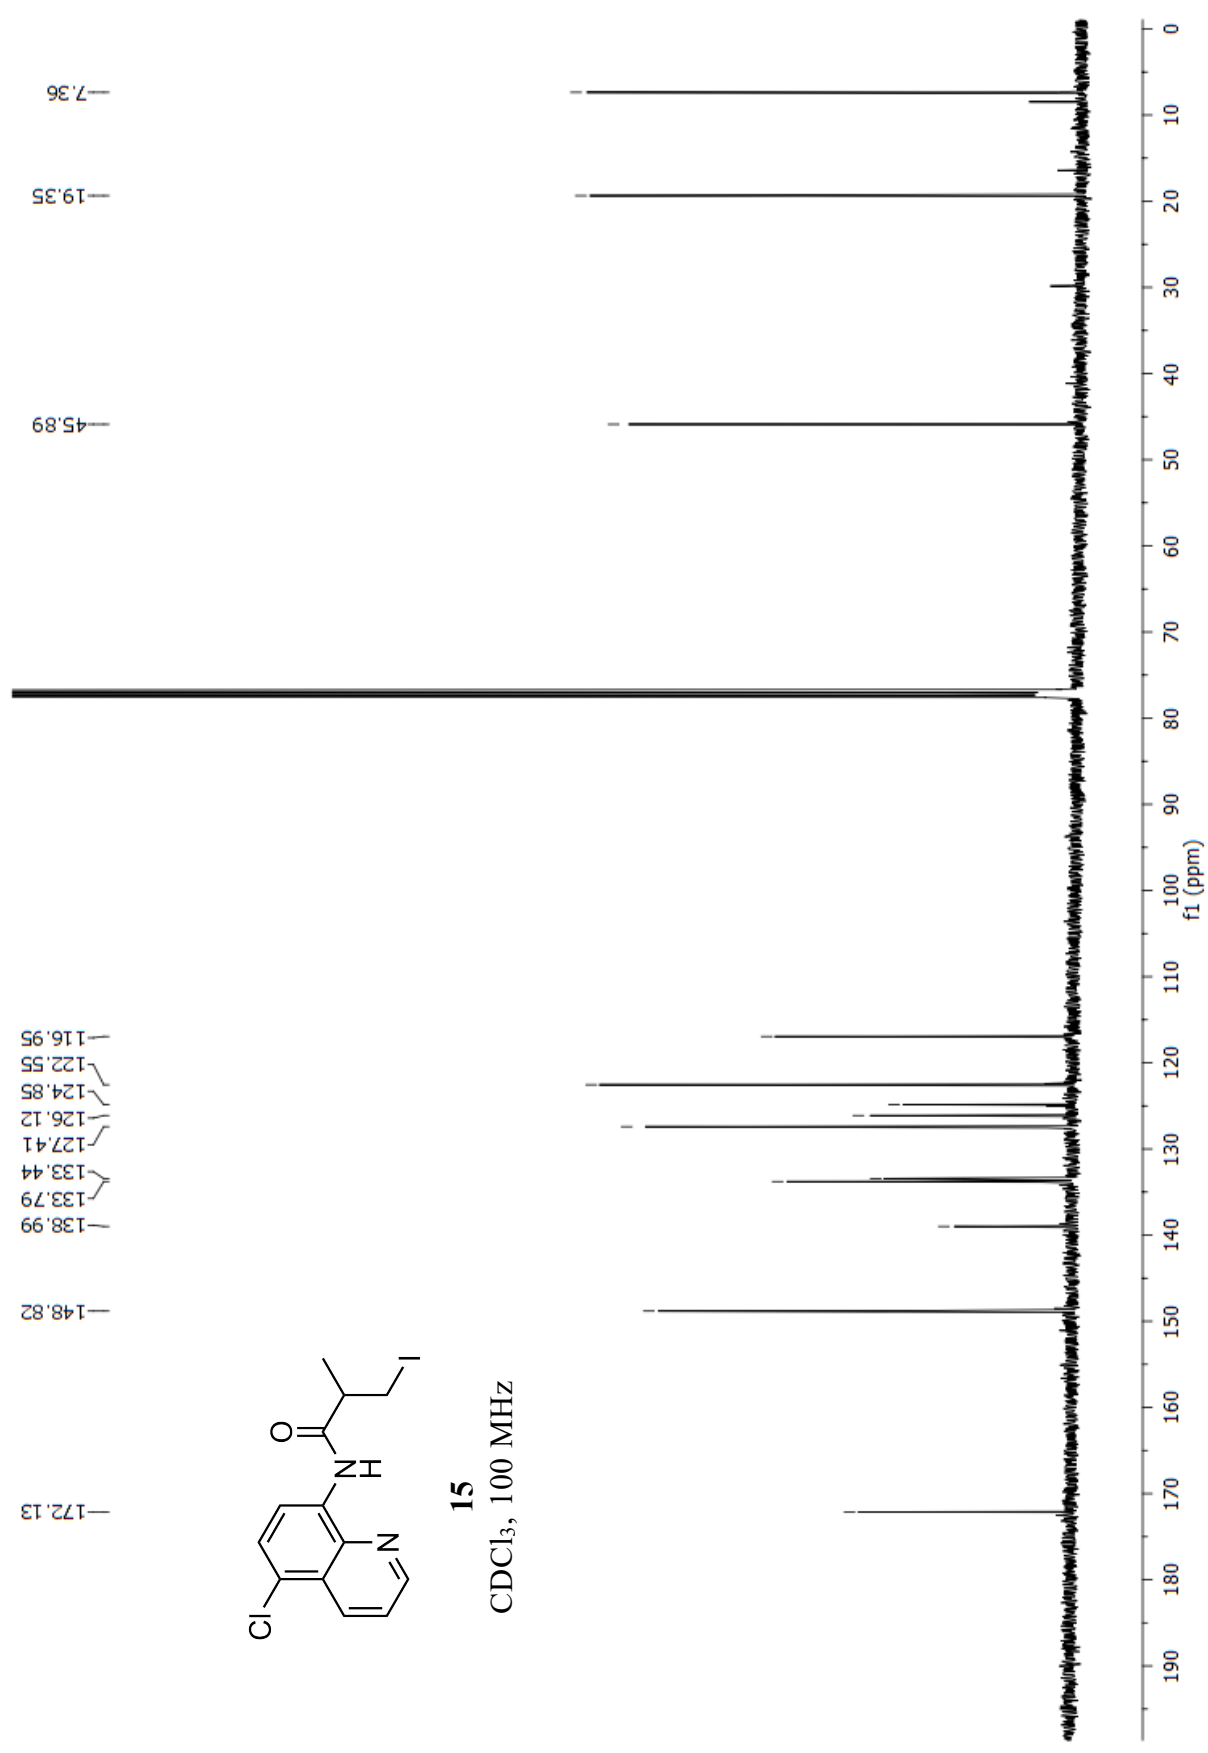

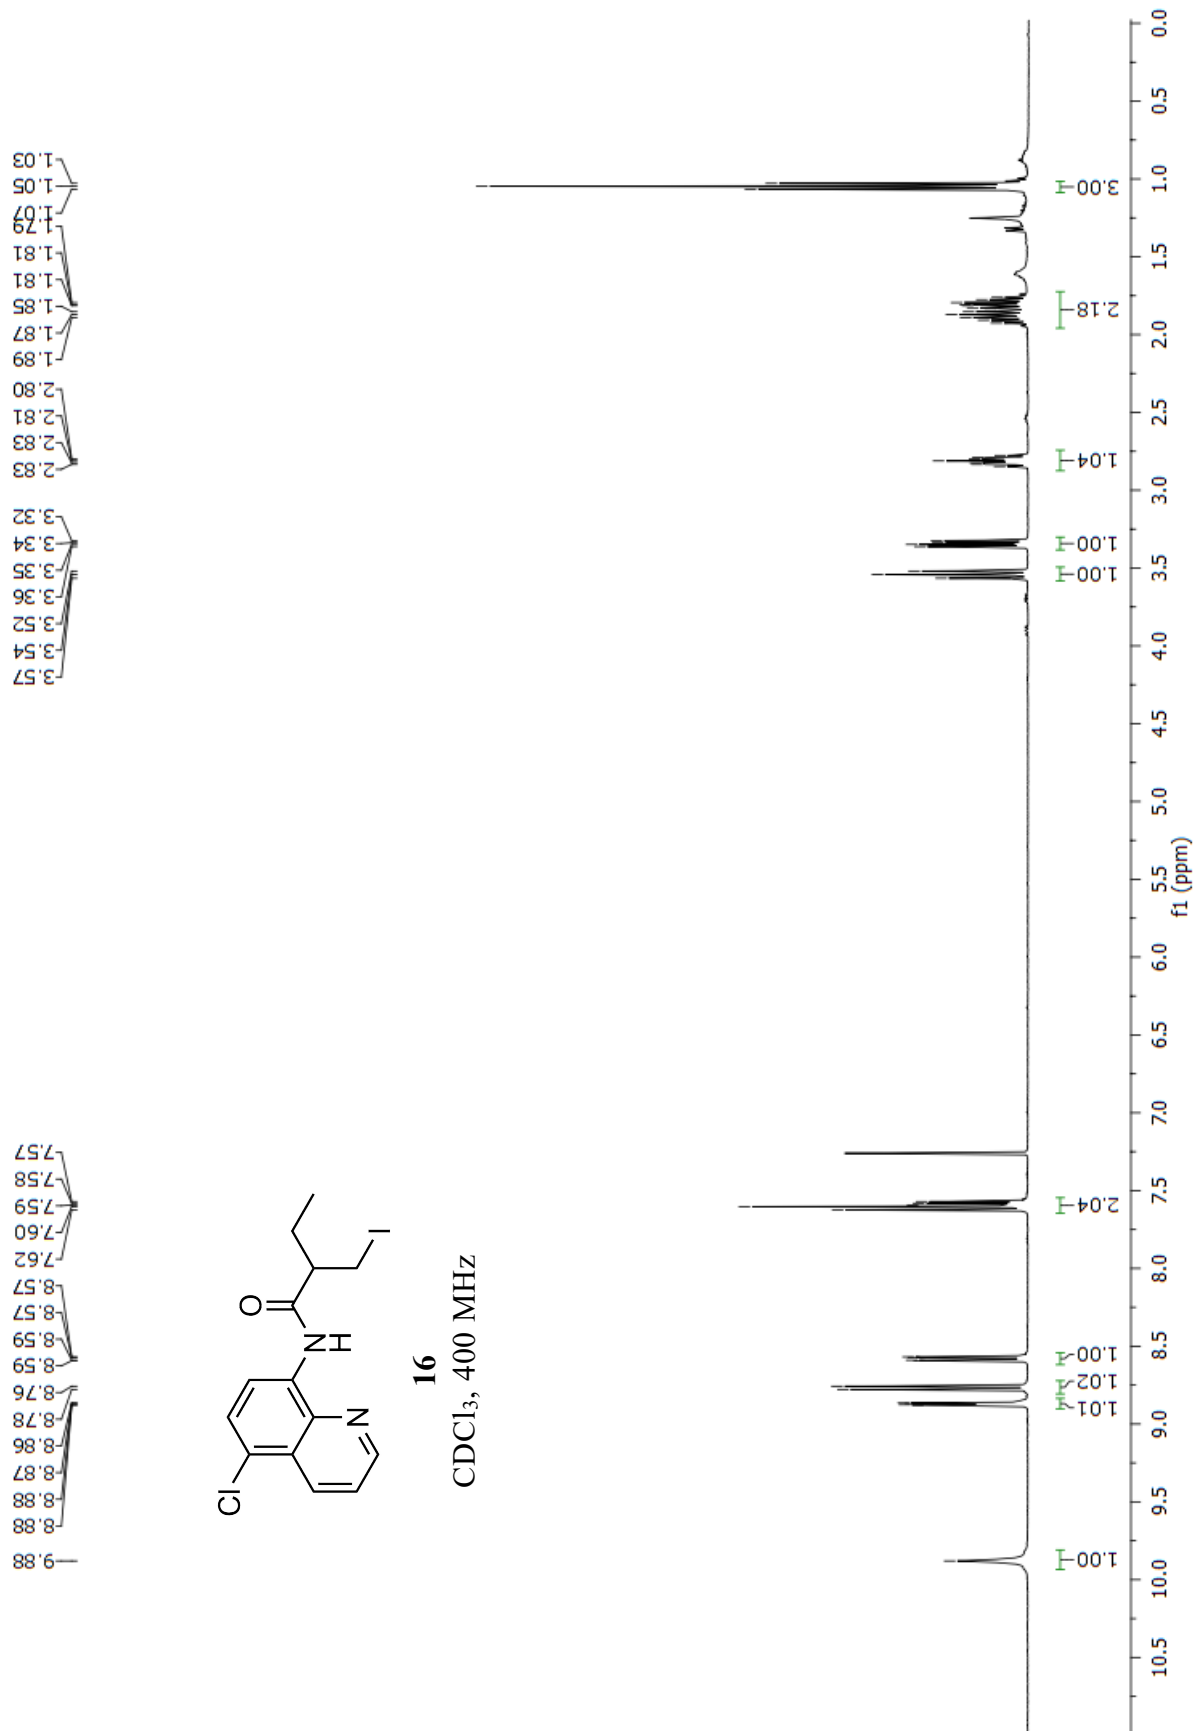

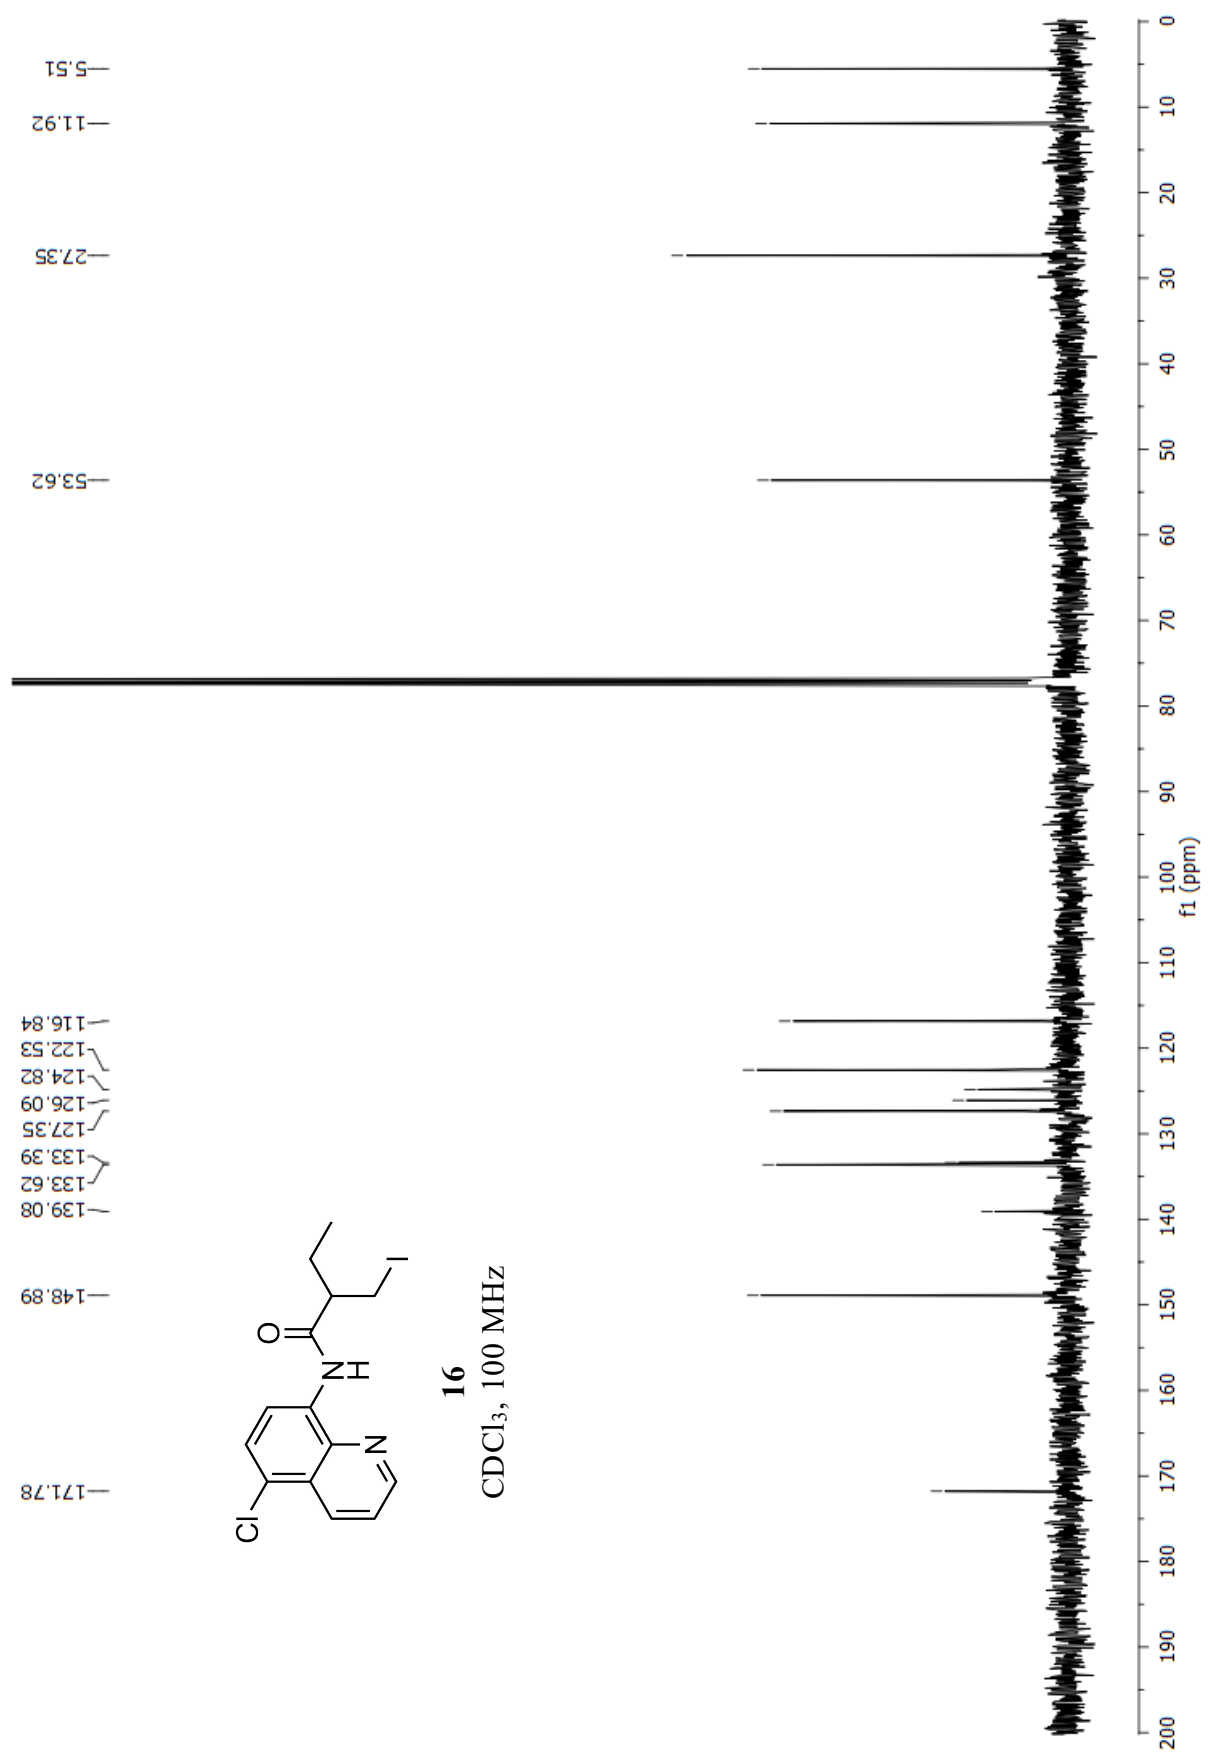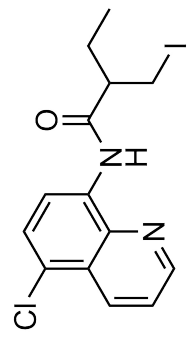

**16**  
CDCl<sub>3</sub>, 100 MHz

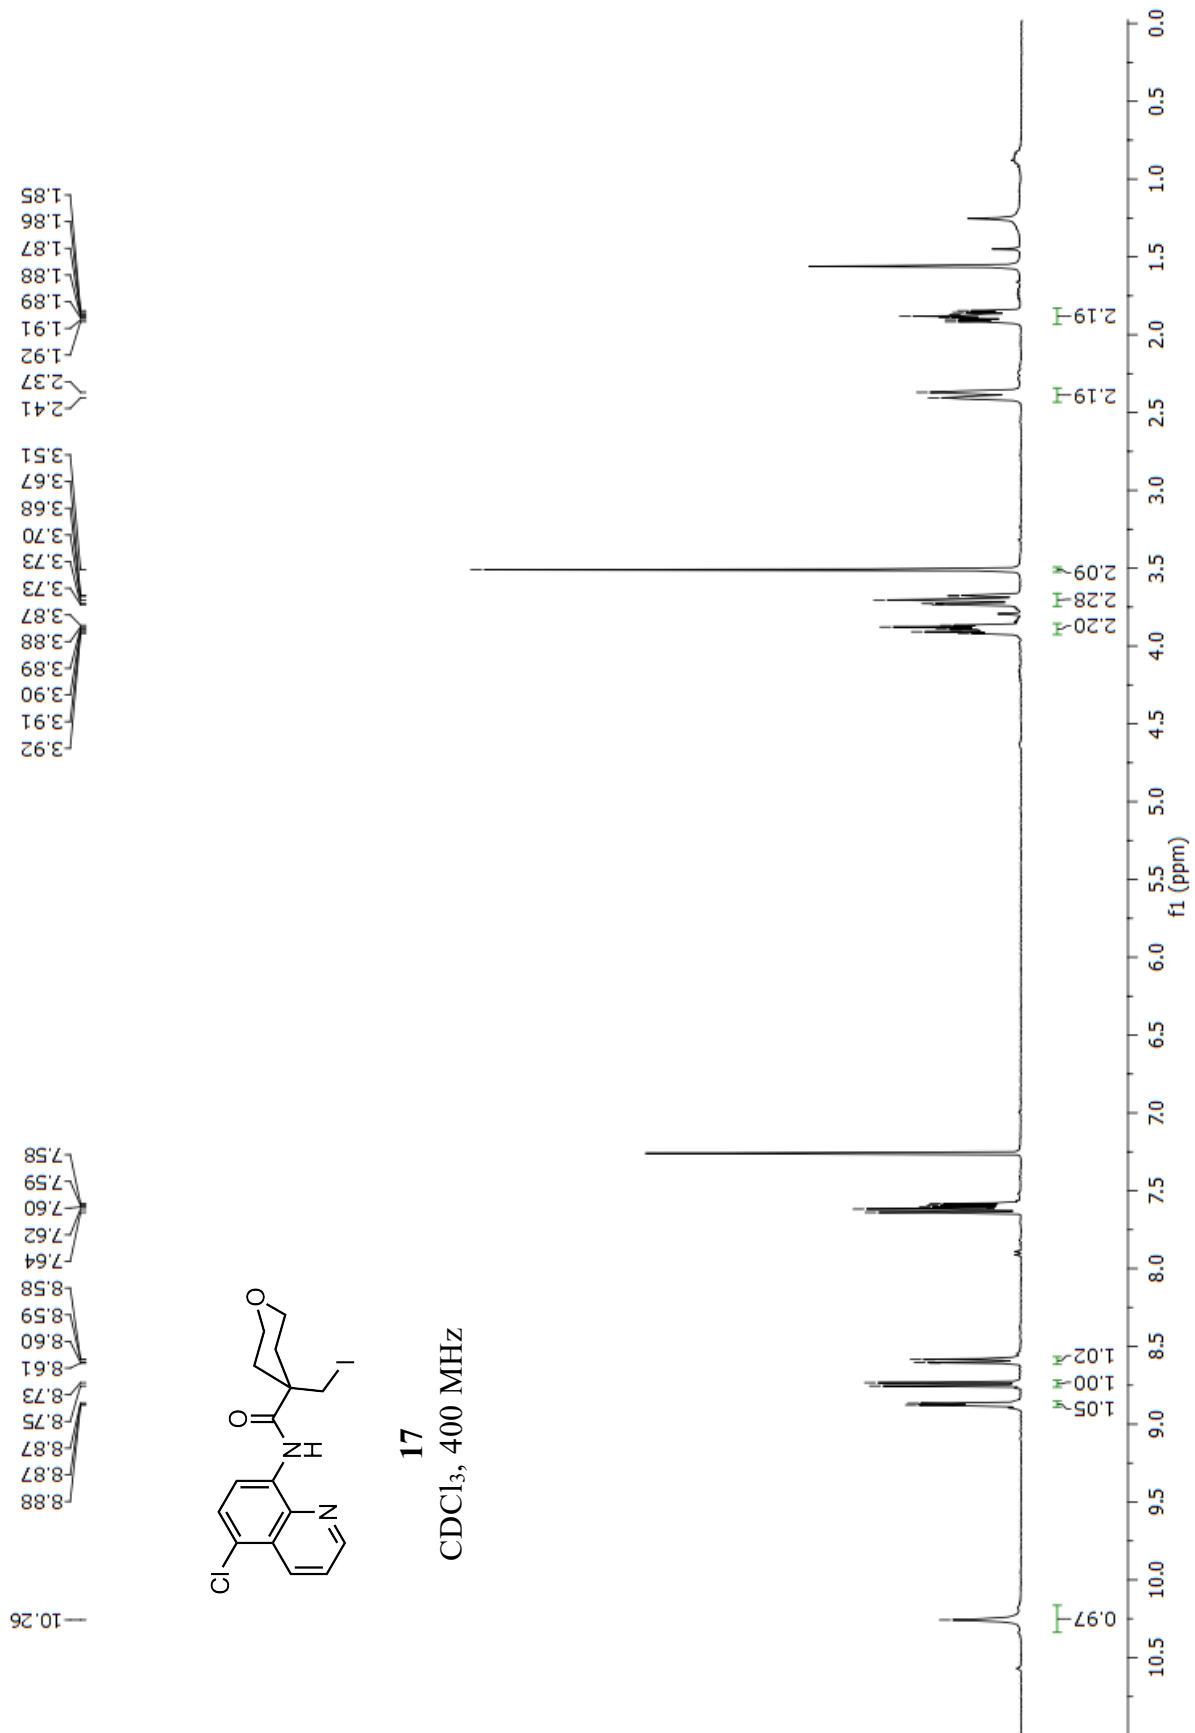

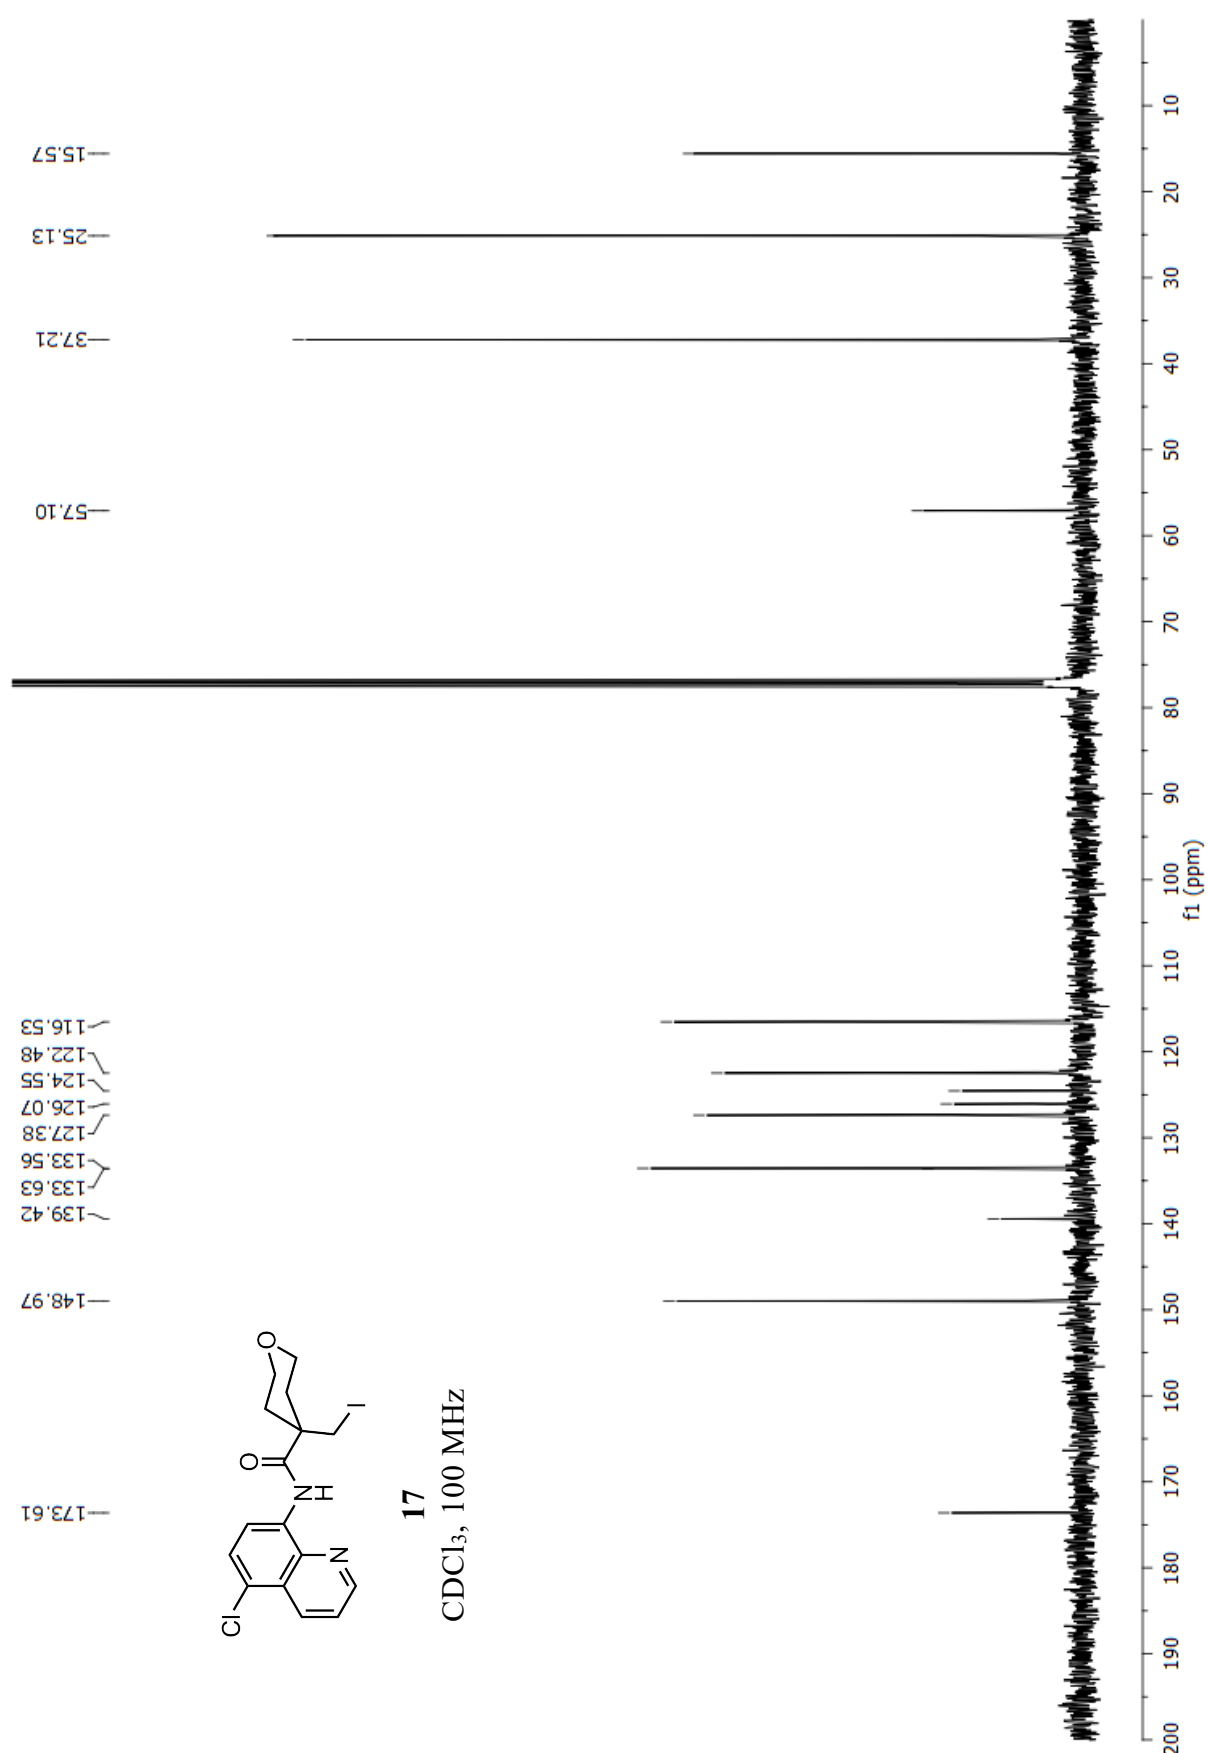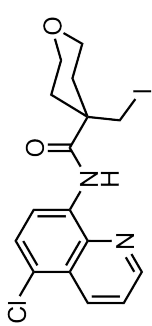

**17**

CDCl<sub>3</sub>, 100 MHz

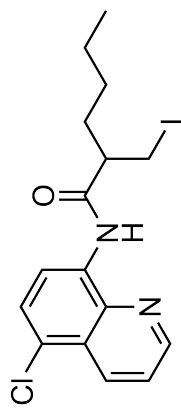

**18**

CDCl<sub>3</sub>, 400 MHz

3.56  
3.54  
3.51  
3.35  
3.33  
3.32  
3.31  
2.88  
2.87  
2.86  
2.85  
1.59  
1.41  
1.40  
1.39  
1.38  
1.36  
1.33  
0.90  
0.89  
0.88  
0.87

9.87  
8.88  
8.88  
8.87  
8.87  
8.75  
8.59  
8.59  
8.57  
8.57  
7.62  
7.60  
7.59  
7.58  
7.57

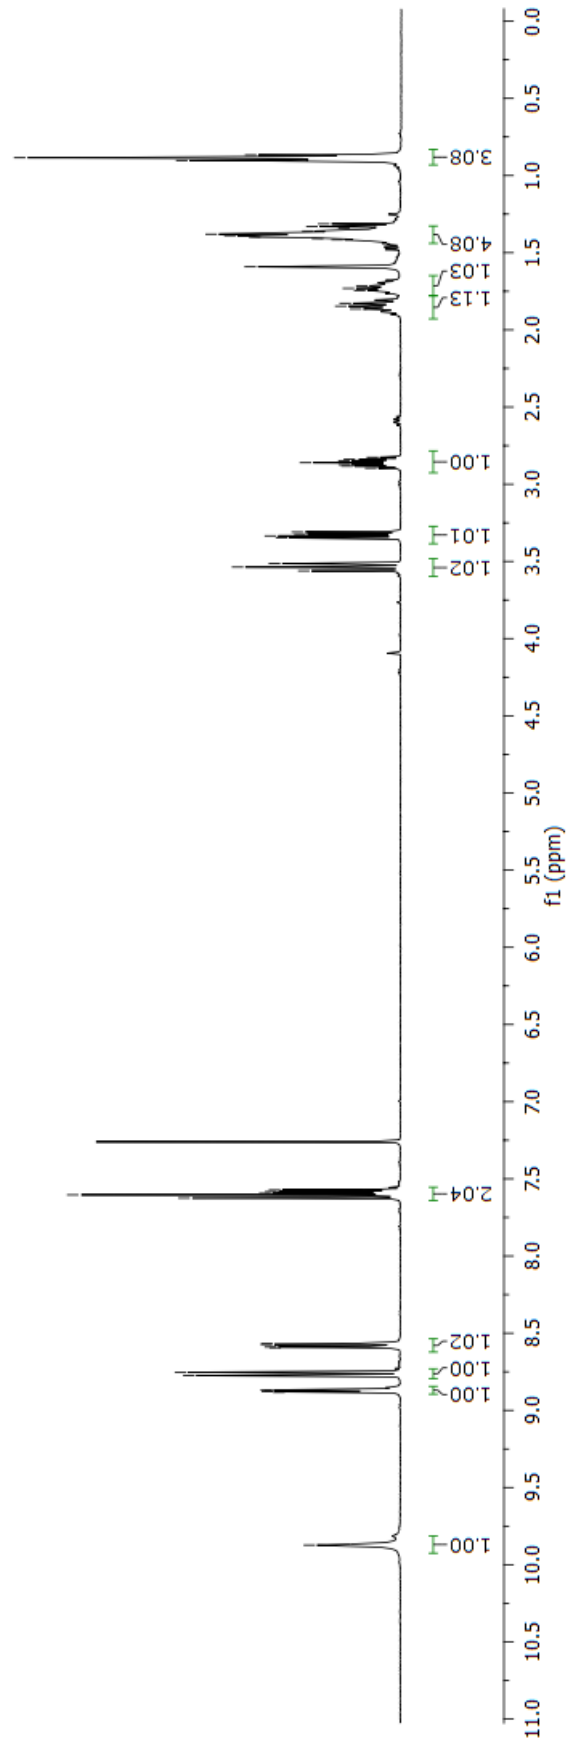

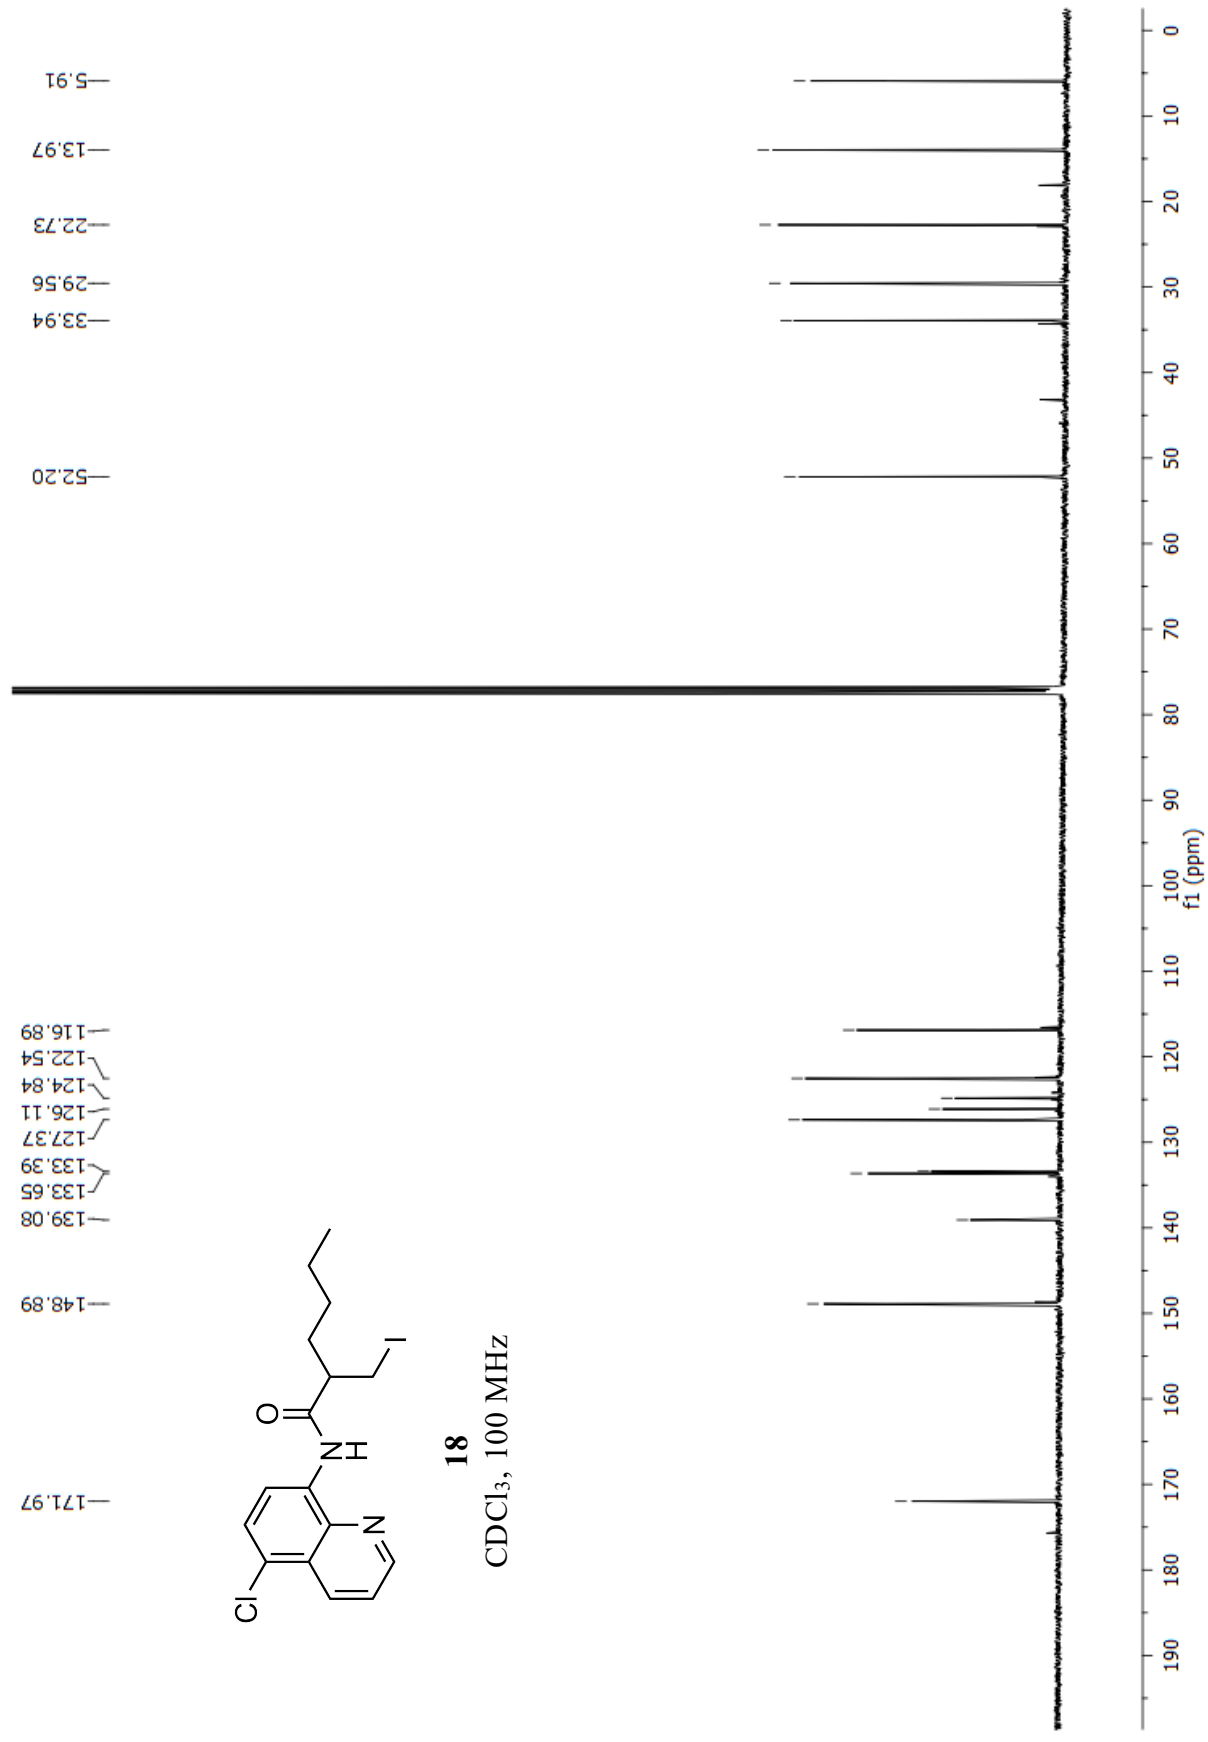

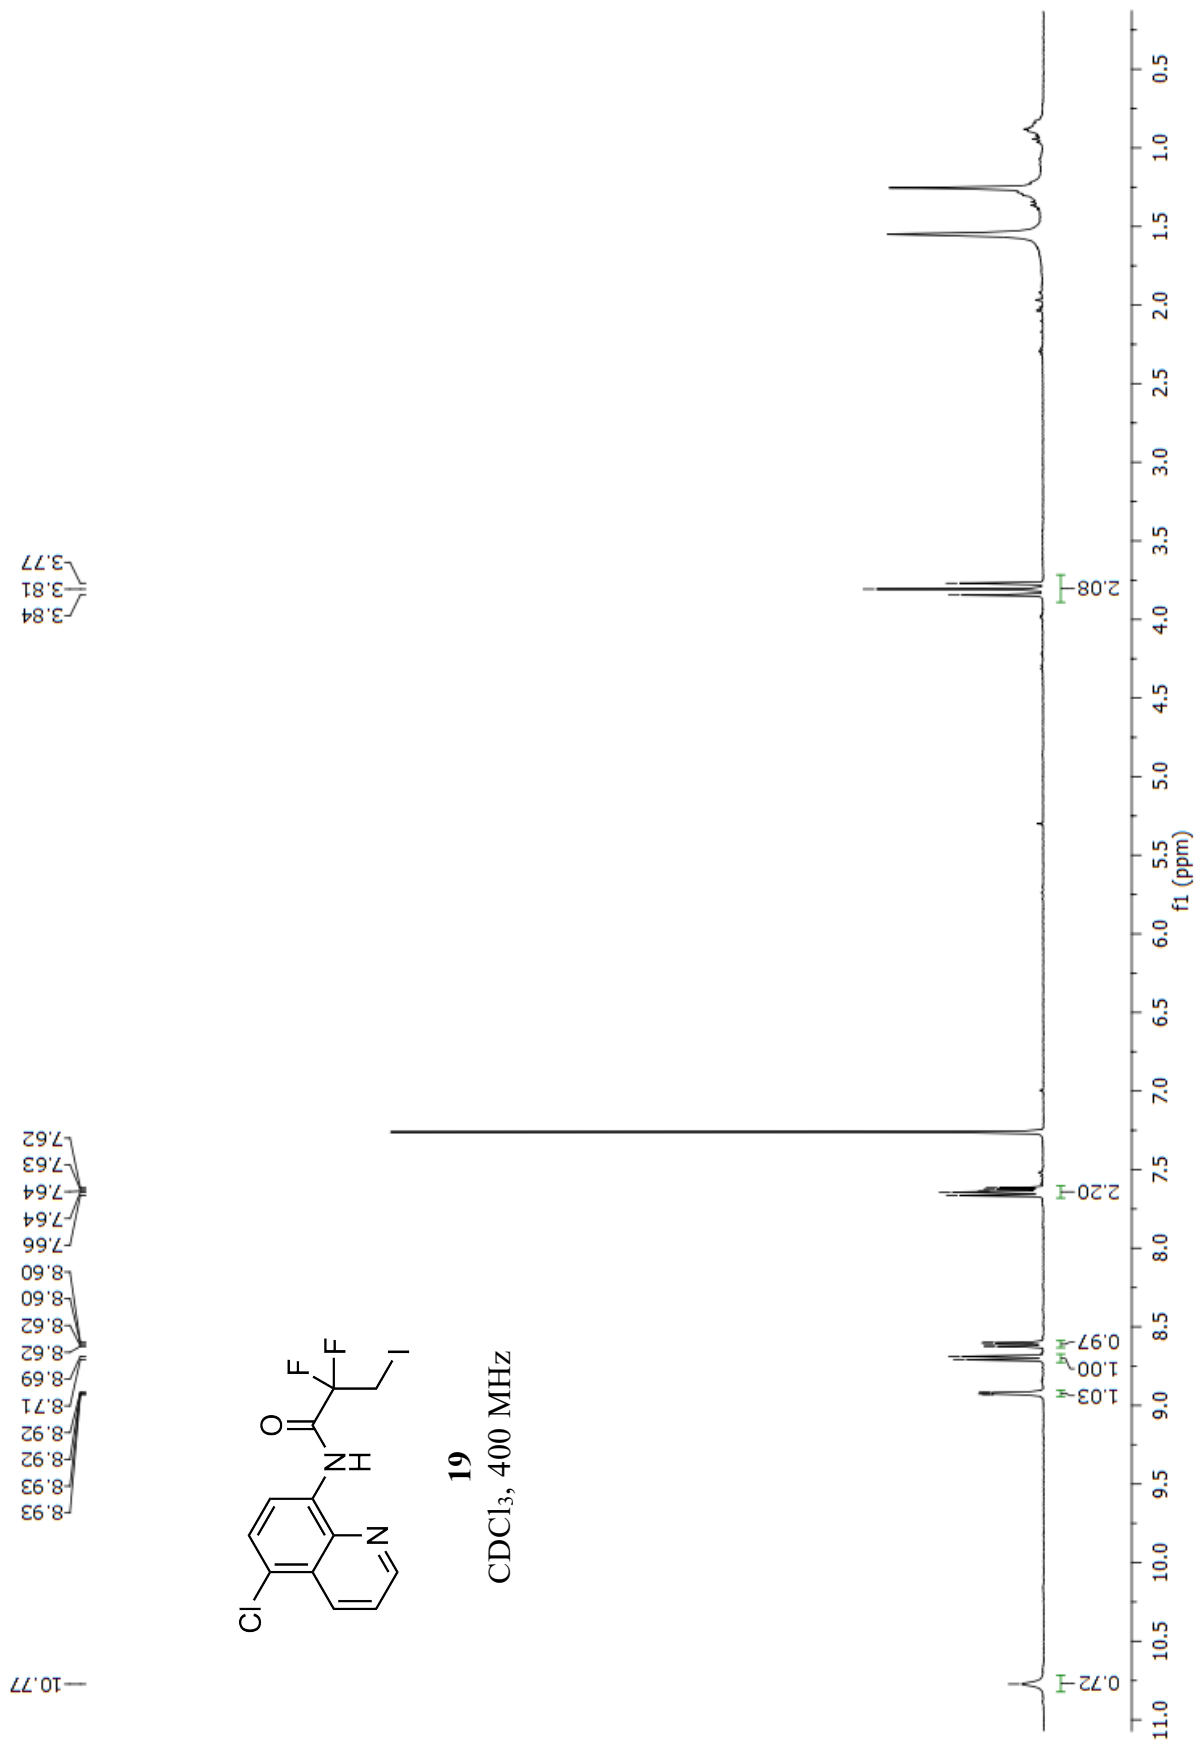



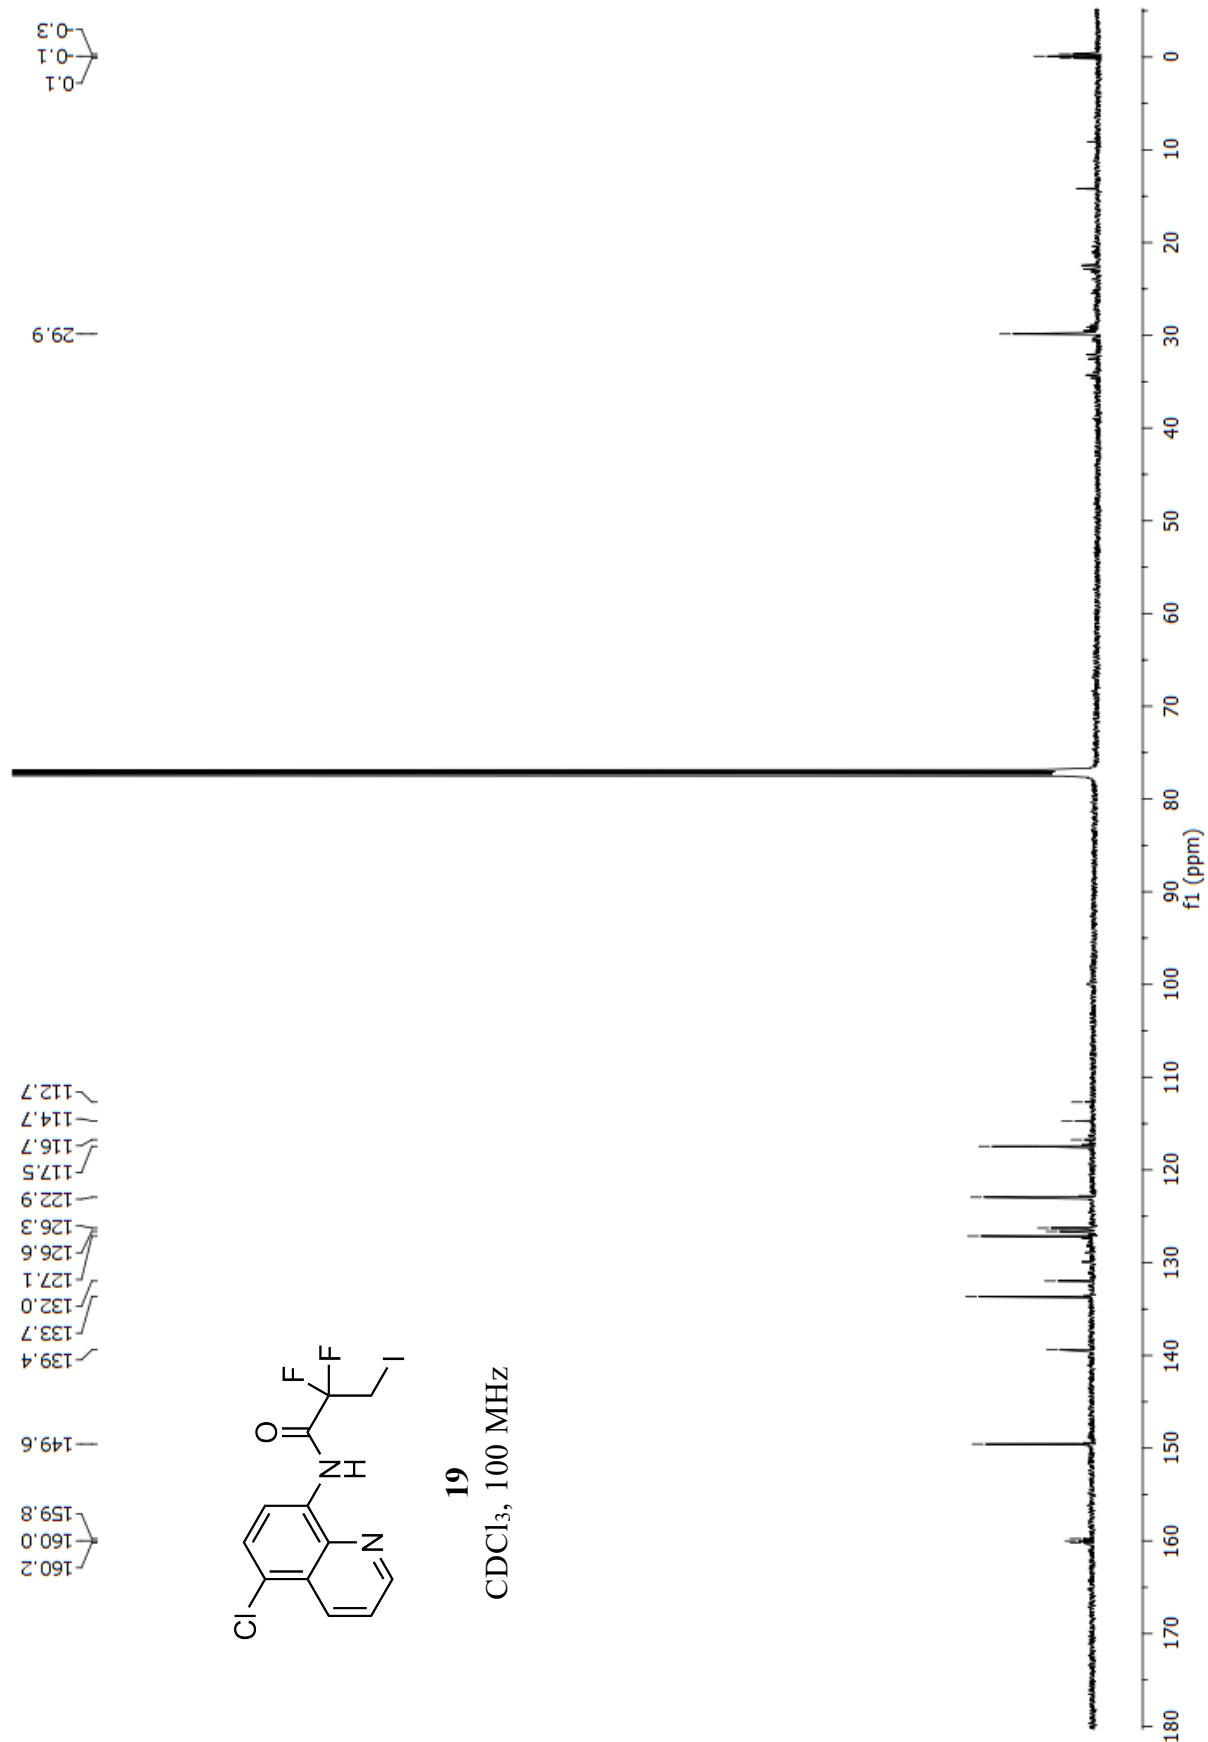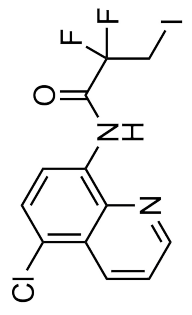

**19**  
CDCl<sub>3</sub>, 100 MHz

- 160.2
- 160.0
- 159.8
- 149.6
- 139.4
- 133.7
- 132.0
- 127.1
- 126.6
- 126.3
- 122.9
- 117.5
- 116.7
- 114.7
- 112.7

29.9

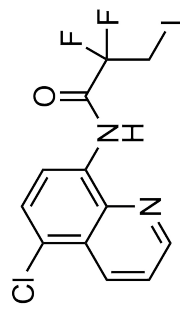

**19**

CDCl<sub>3</sub>, 376 MHz

100.74  
100.75  
100.78  
100.79  
100.82  
100.83

100.74  
100.75  
100.78  
100.79  
100.82  
100.83

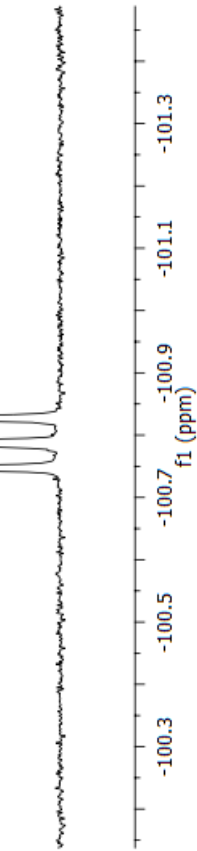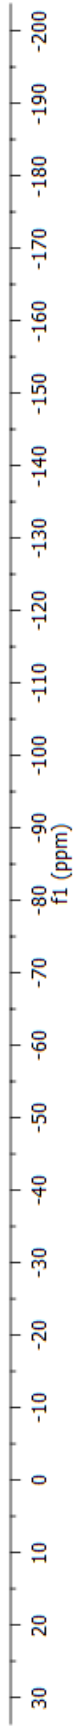

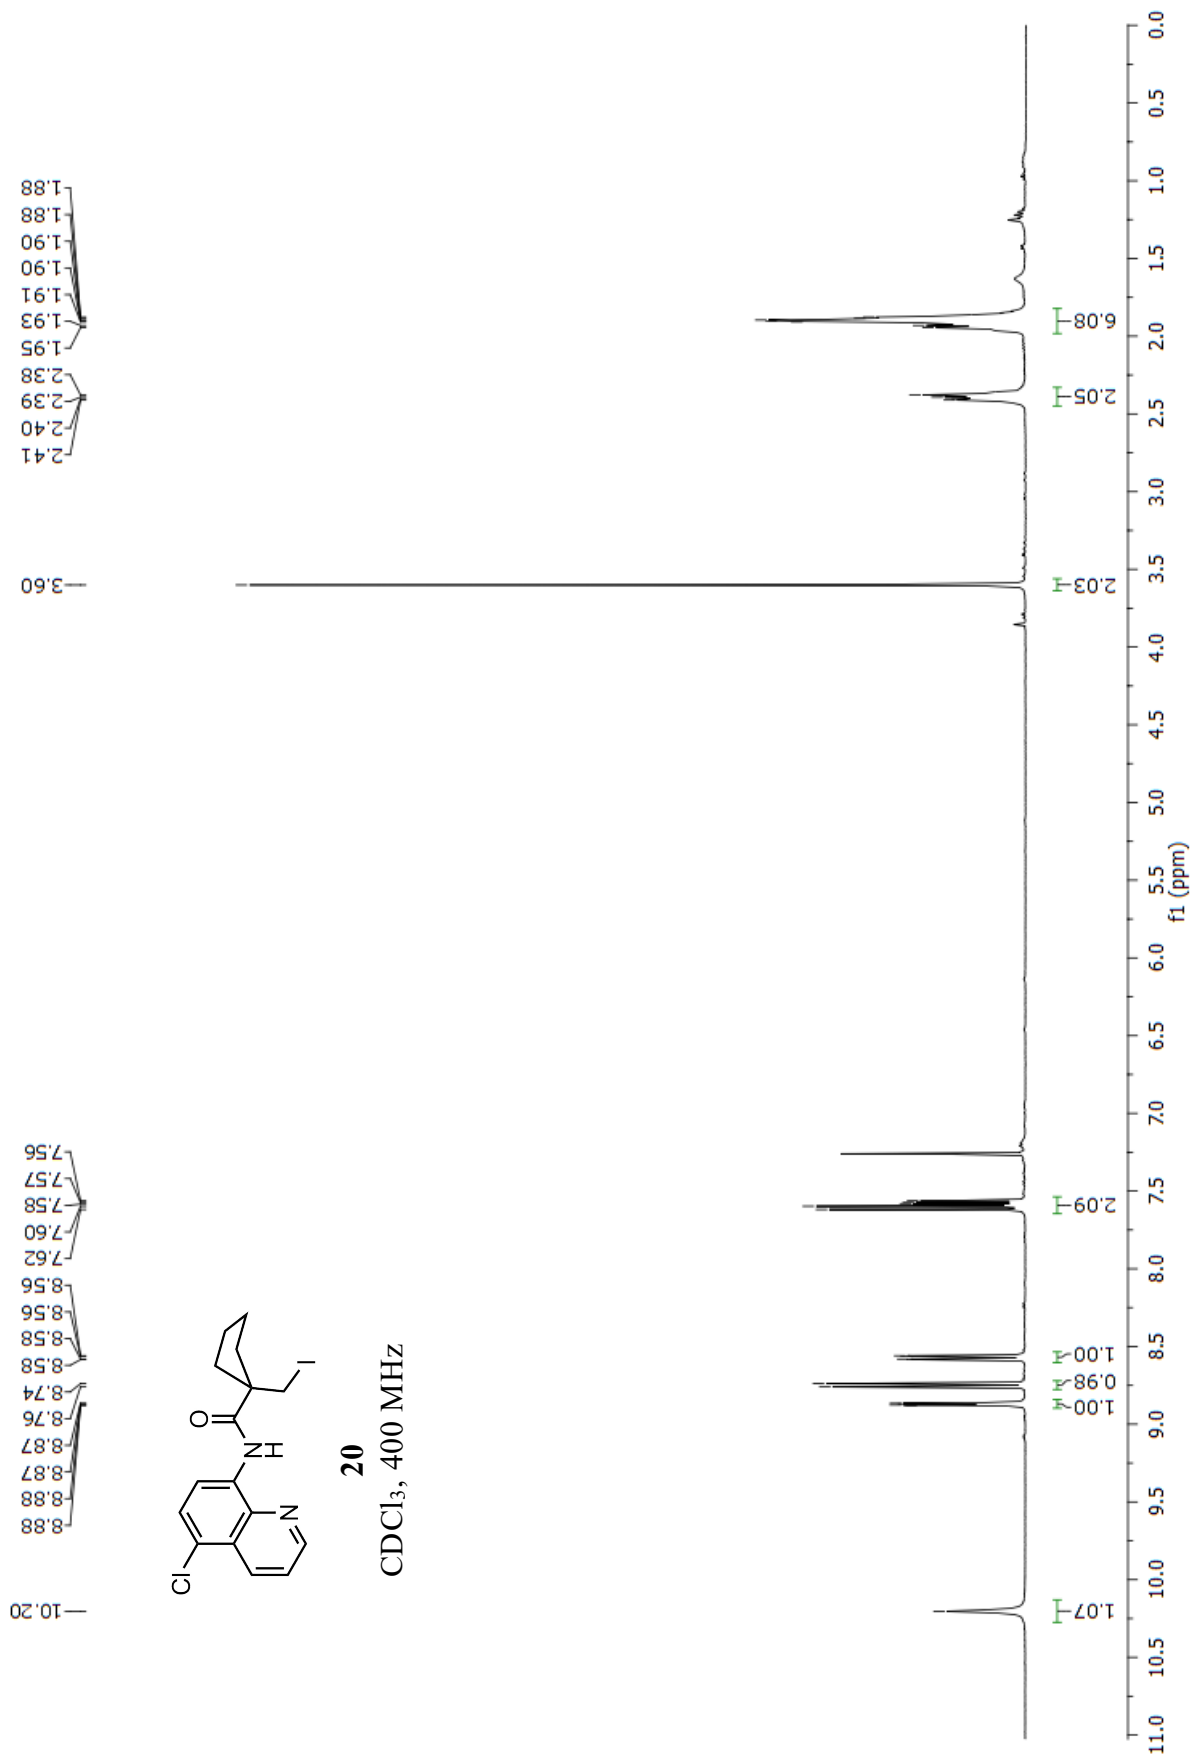

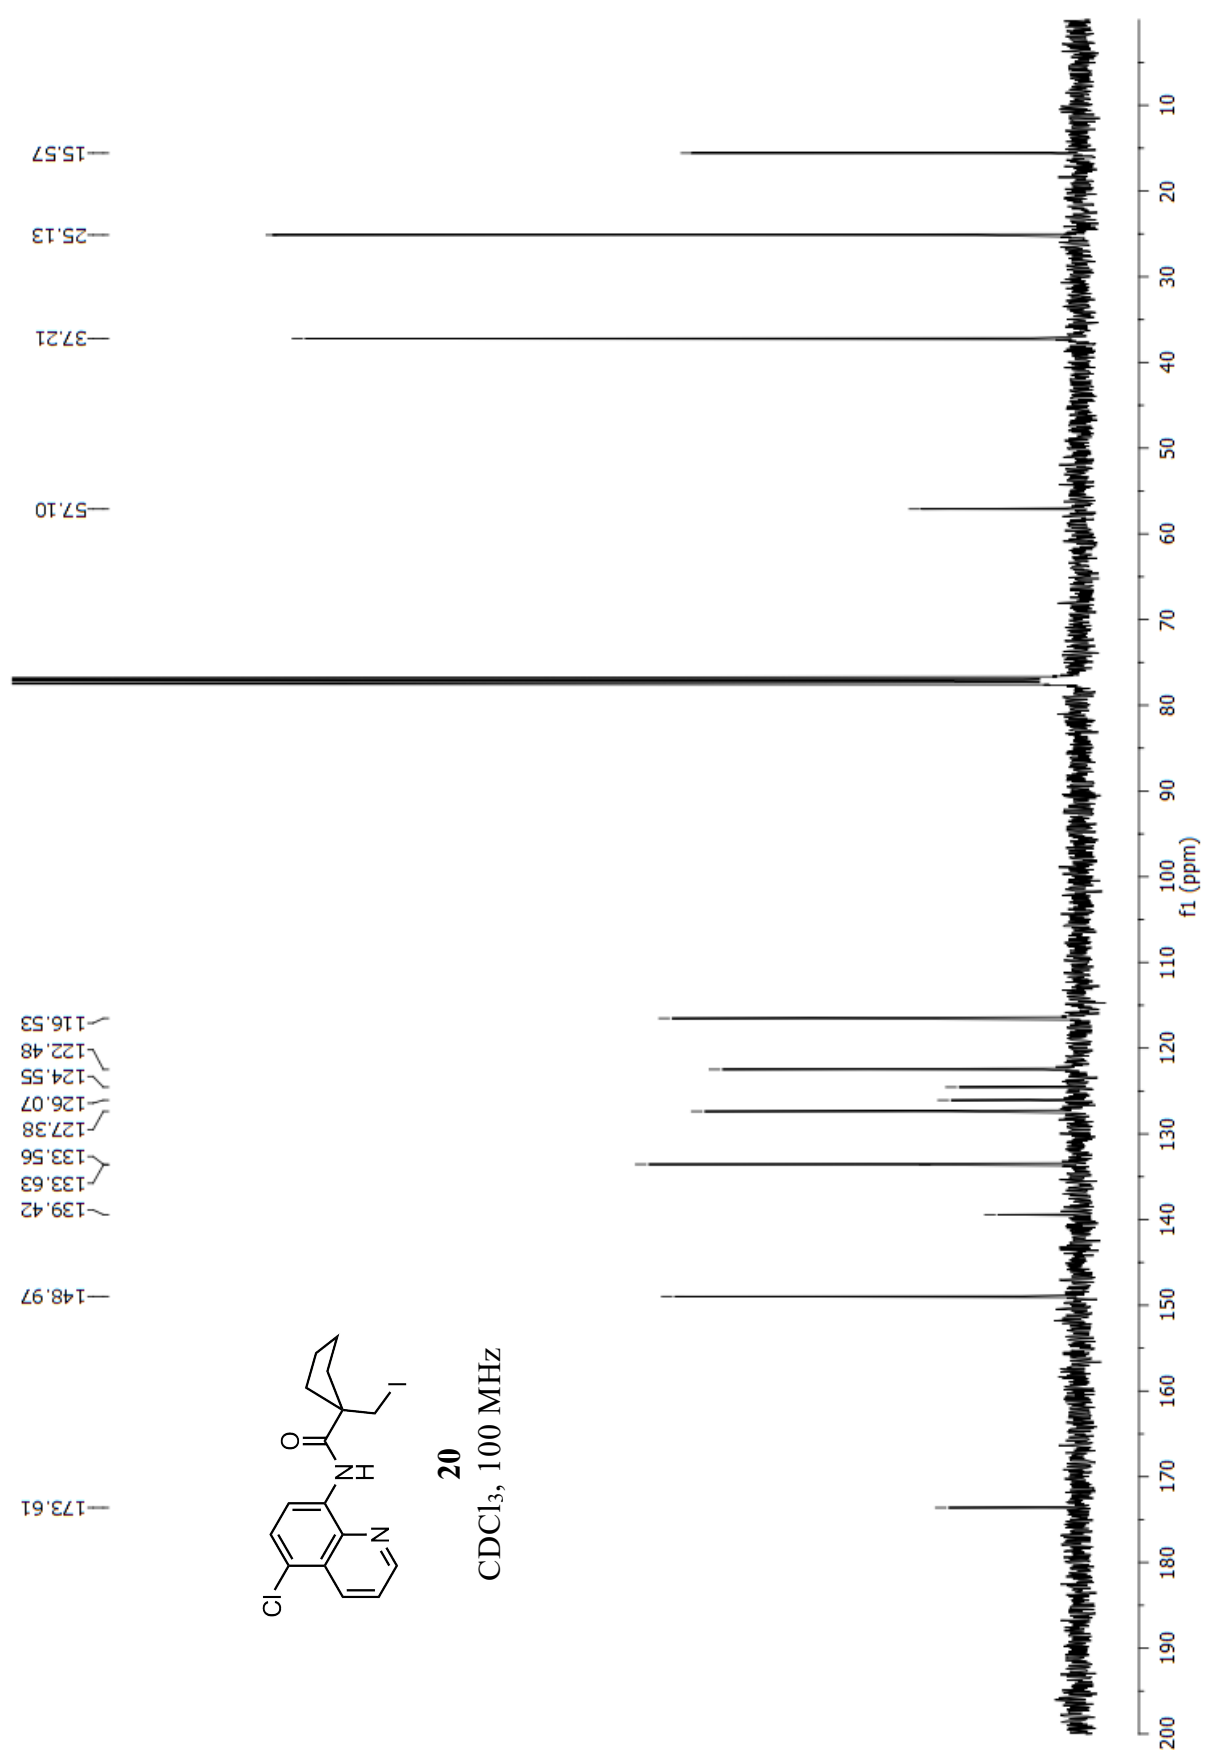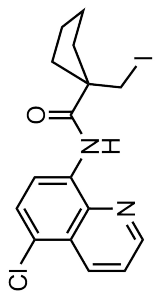

**20**  
CDCl<sub>3</sub>, 100 MHz

0.68  
0.89  
0.93  
1.01  
1.03  
1.19  
1.22  
1.24  
1.25  
1.26  
1.28  
1.31  
1.46  
1.47  
1.49  
1.51  
1.51  
1.54  
1.56  
1.57  
1.58  
1.60  
1.61  
1.62  
1.64  
1.70  
1.75  
1.79  
1.80  
1.84  
1.98  
2.04  
2.05  
2.07  
2.08  
3.13  
3.14  
3.15  
3.20  
3.24  
3.25  
3.31  
3.32  
3.37  
3.43  
3.44  
3.46  
7.57  
7.58  
7.59  
7.60  
7.60  
7.62  
8.56  
8.57  
8.59  
8.59  
8.74  
8.76  
8.88  
8.89  
8.89  
8.90  
9.89

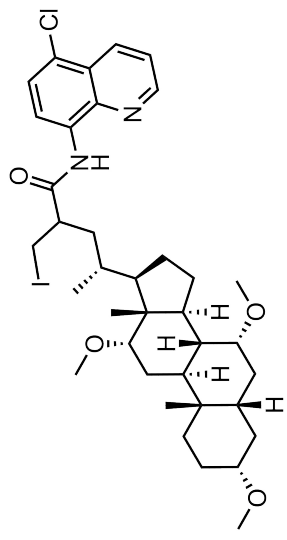

**21**  
CDCl<sub>3</sub>, 400 MHz

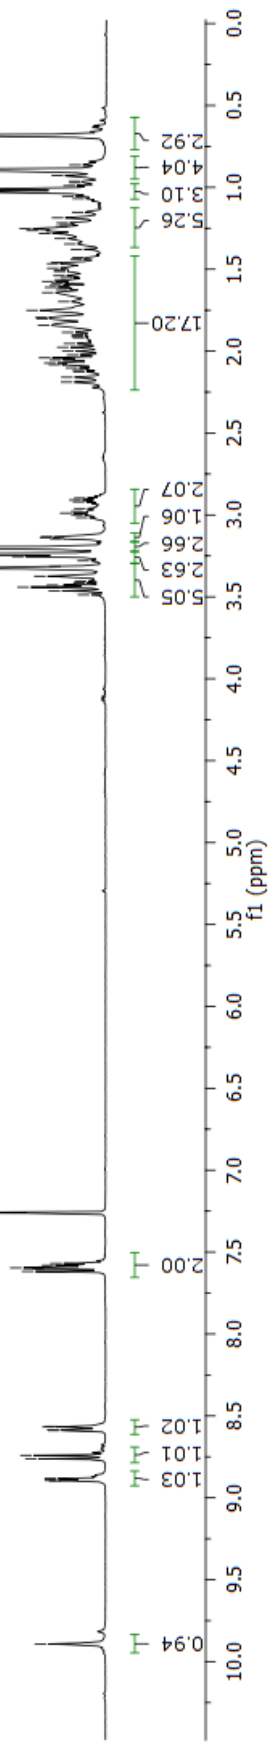

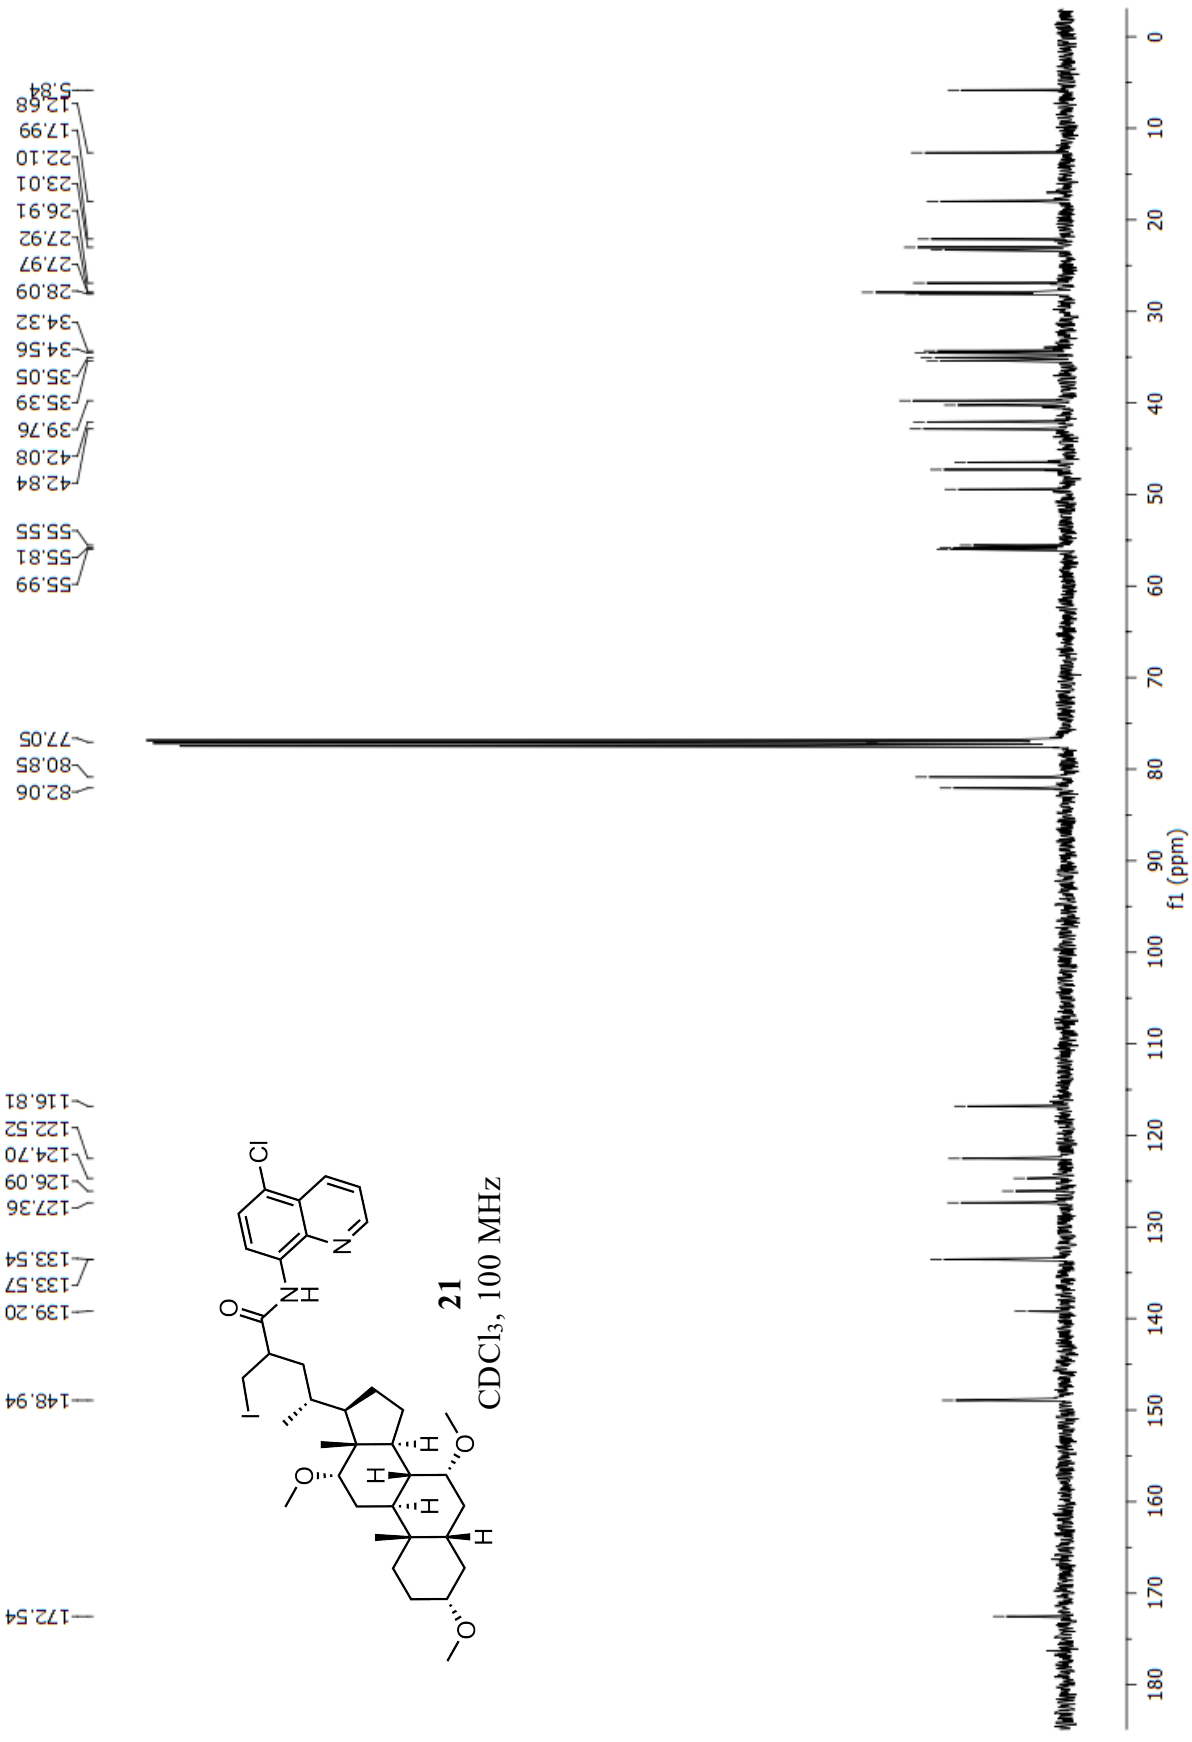

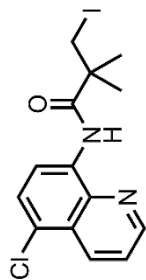

CDCl<sub>3</sub>, 400 MHz

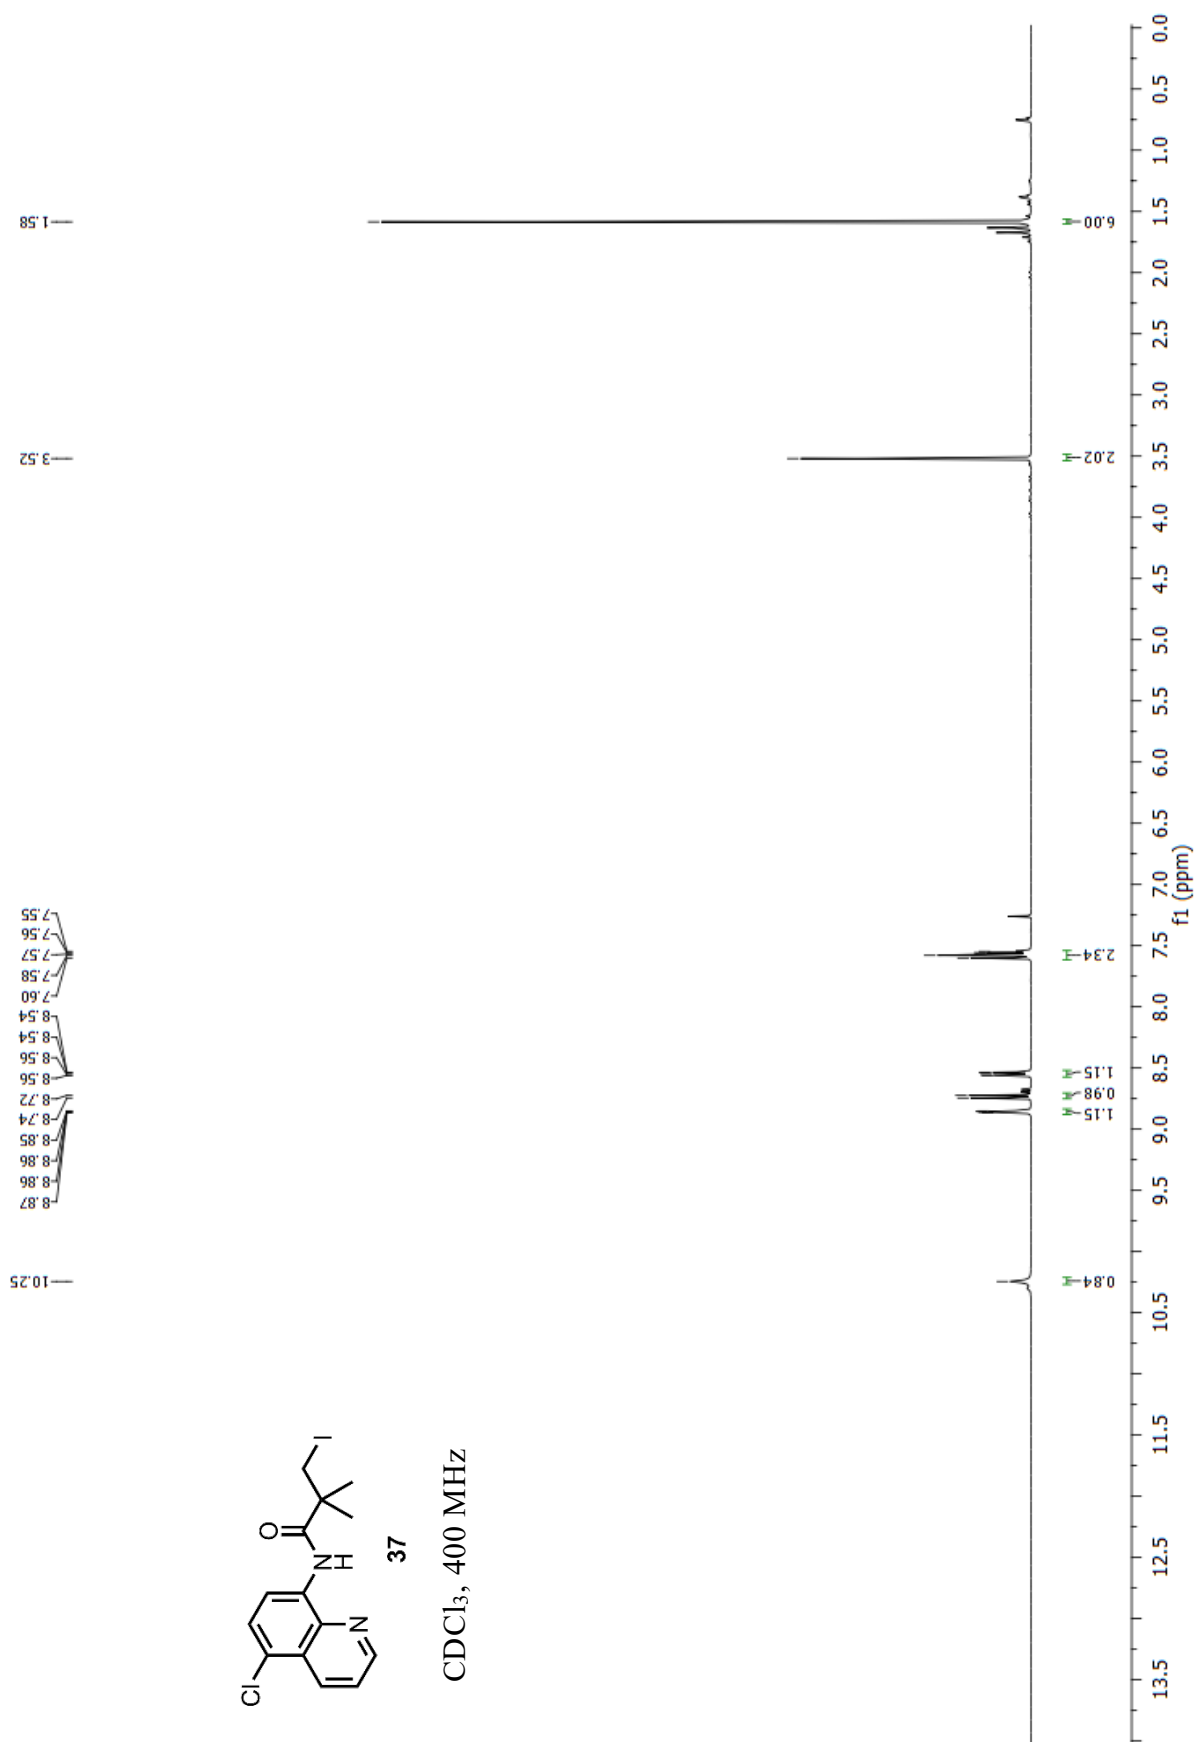

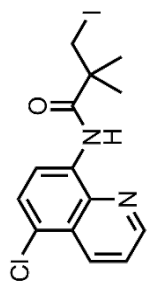

37

CDCl<sub>3</sub>, 100 MHz

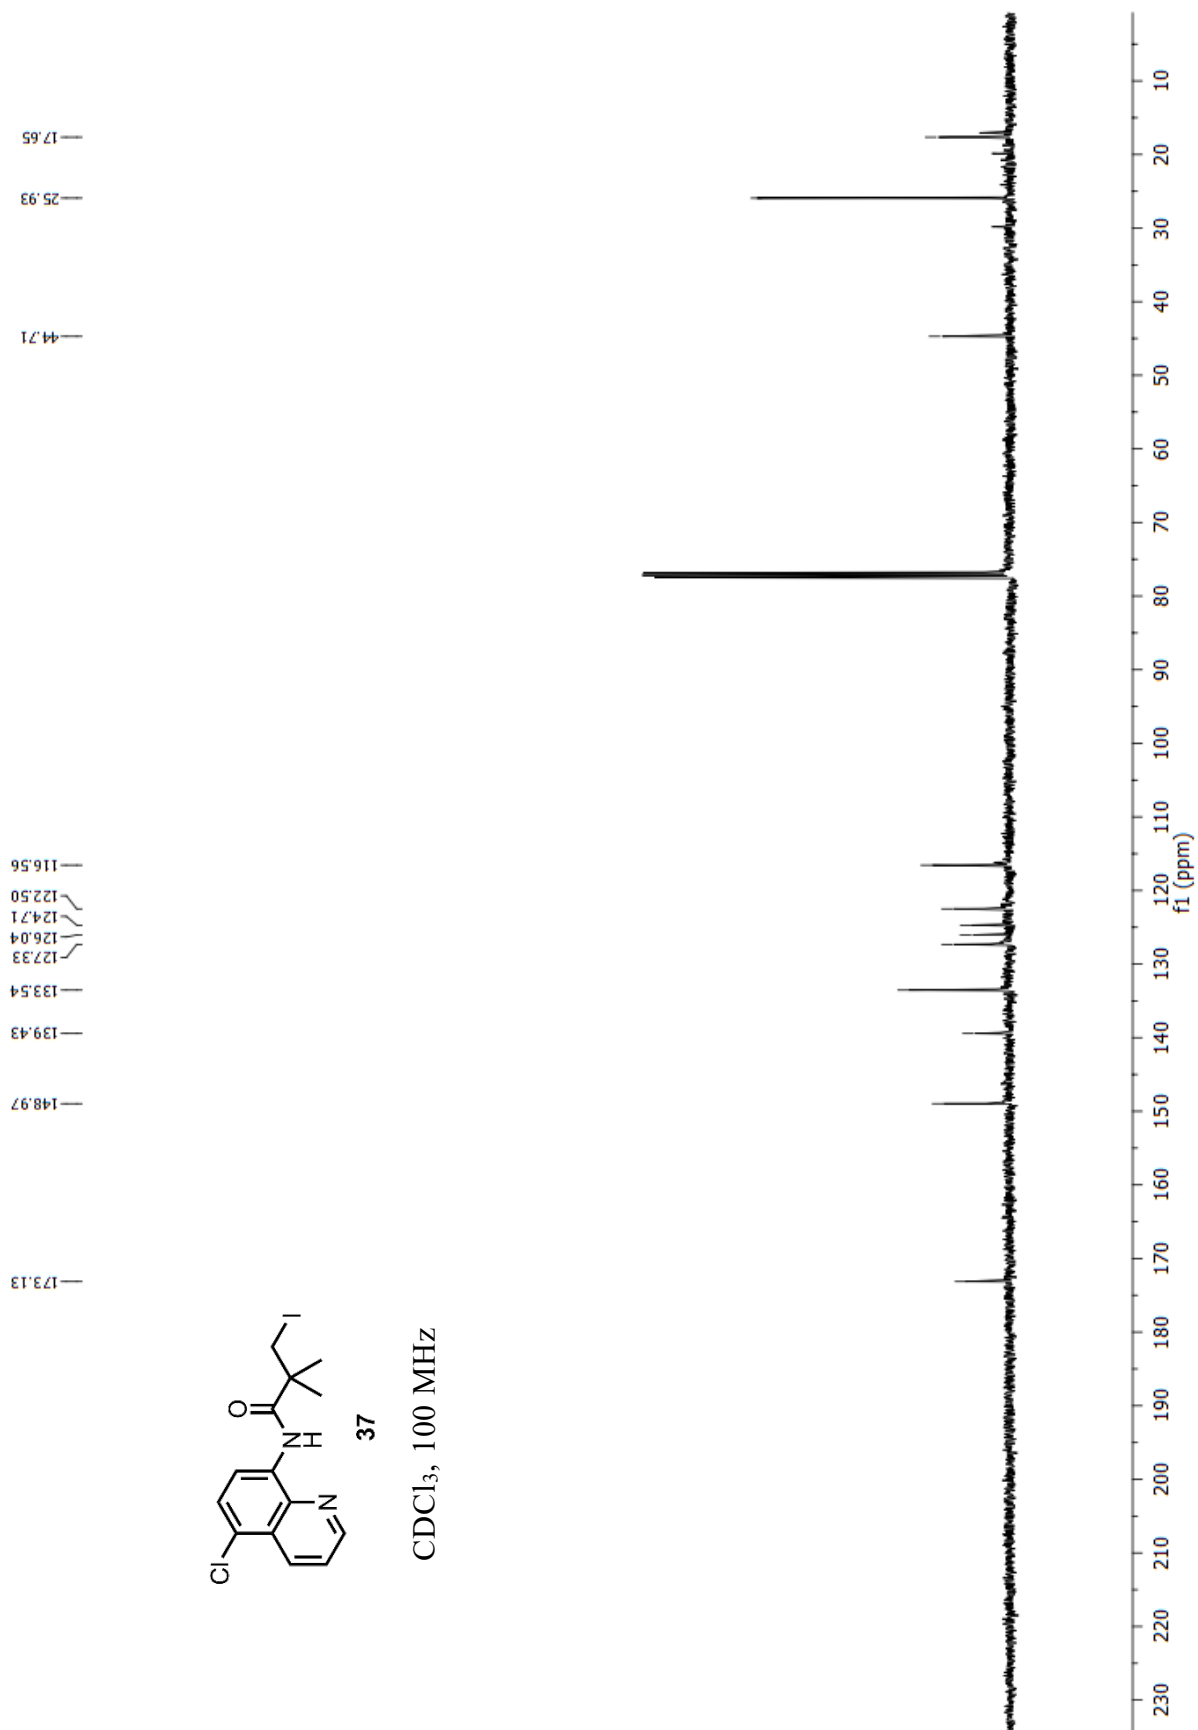



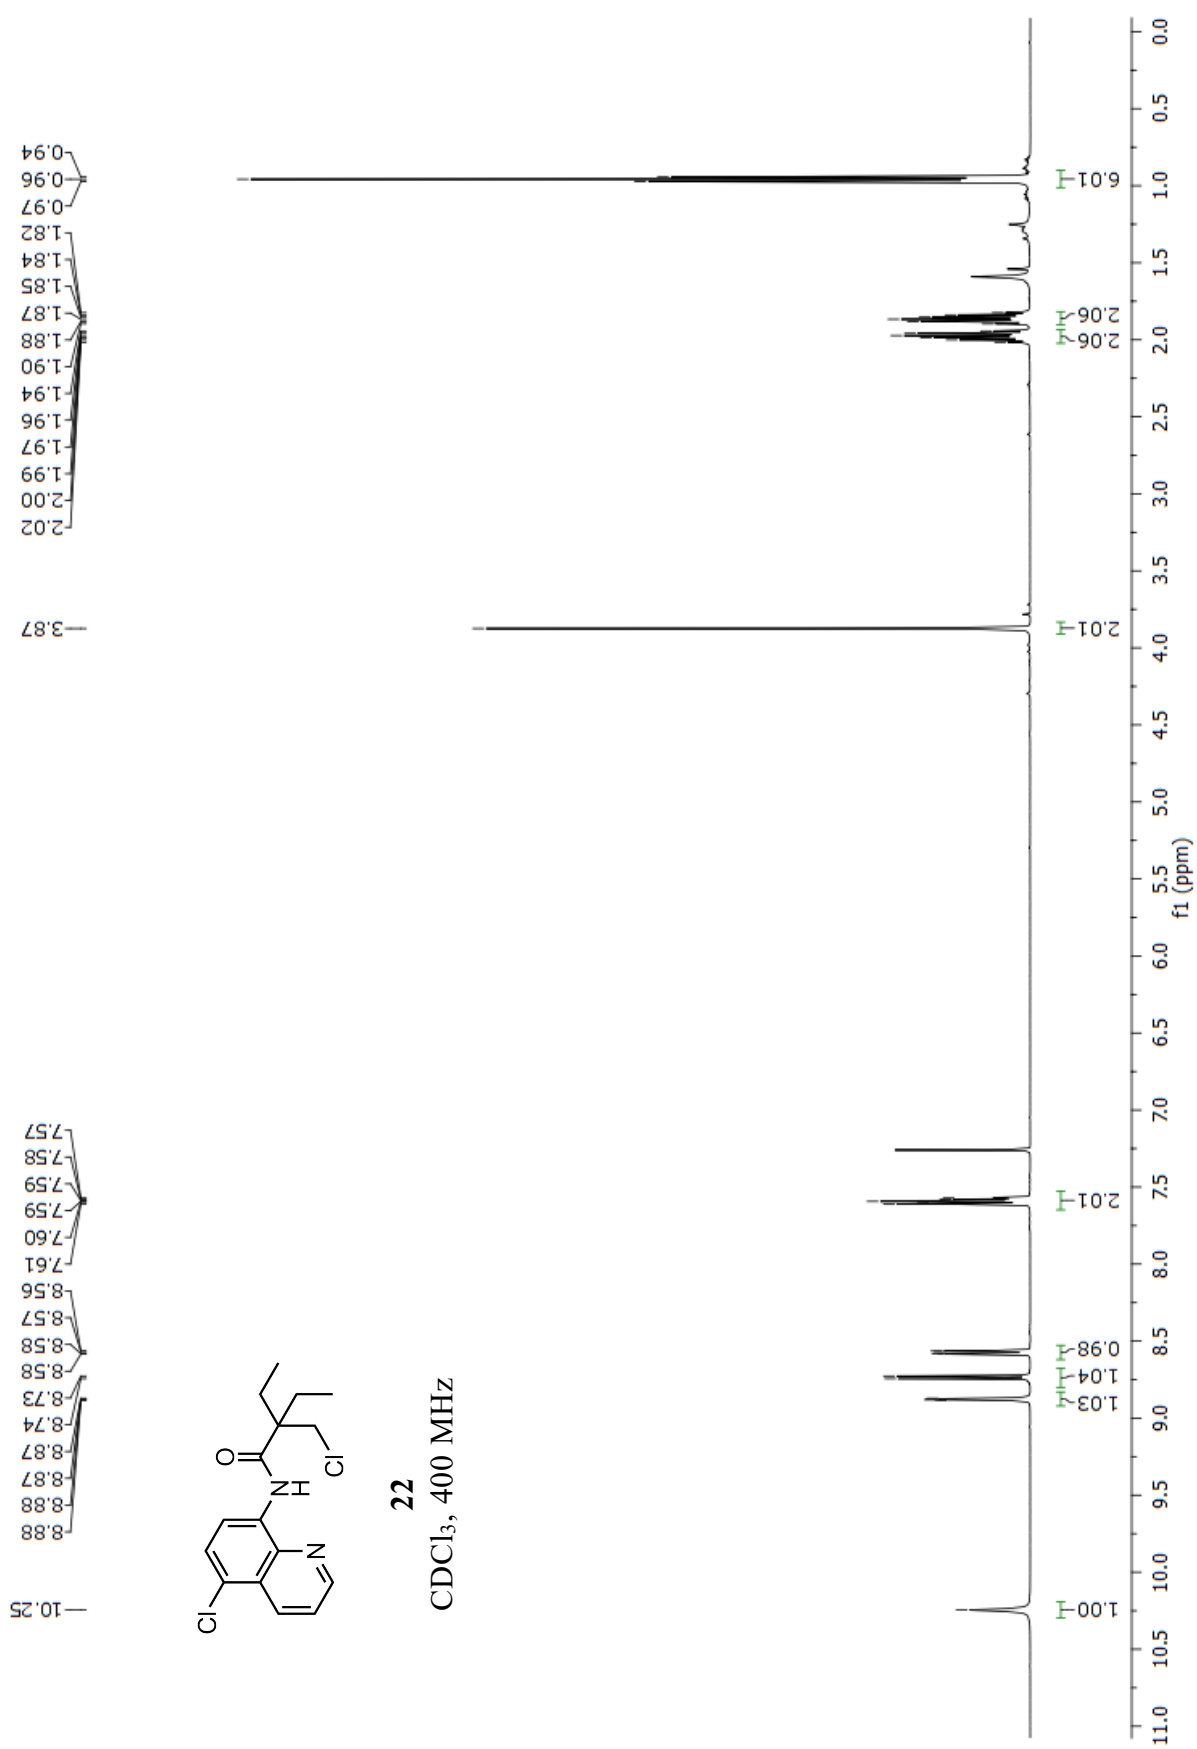

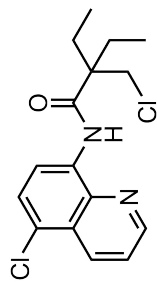

22

CDCl<sub>3</sub>, 100 MHz

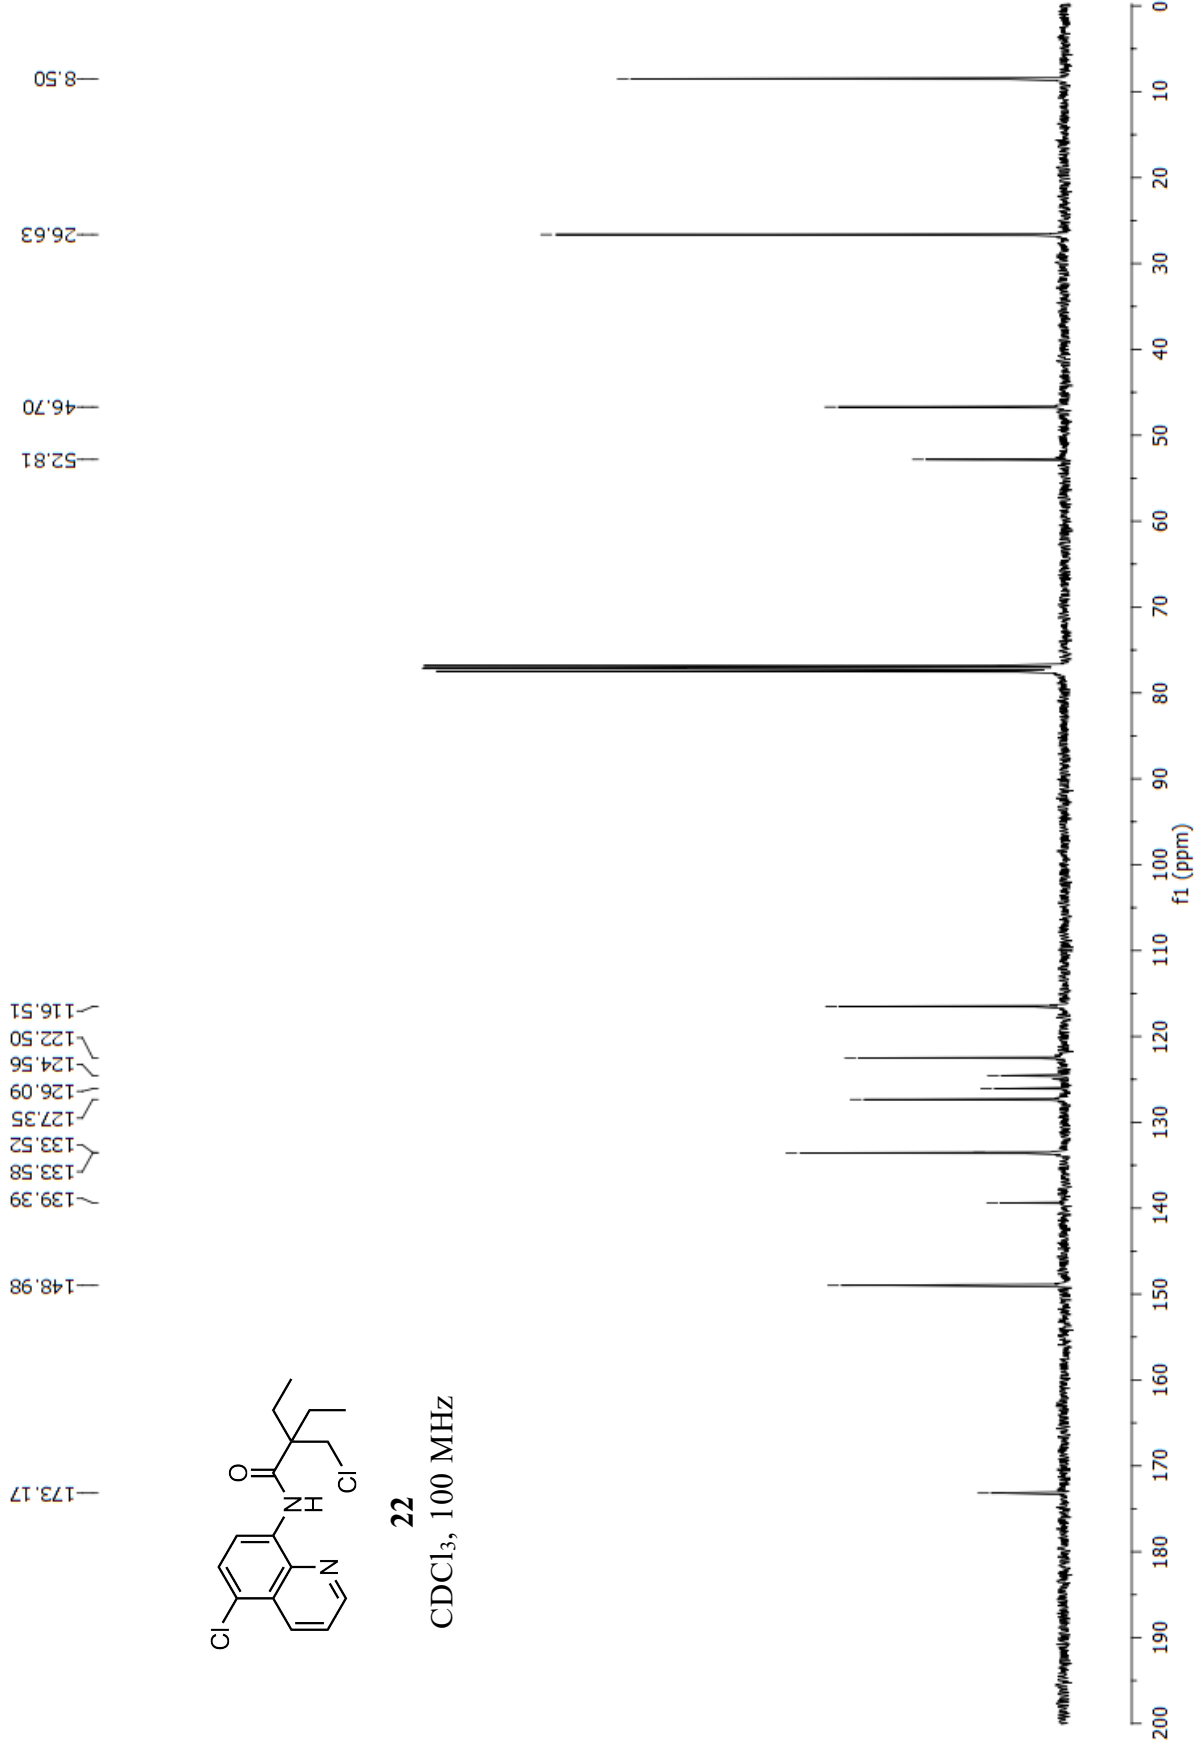

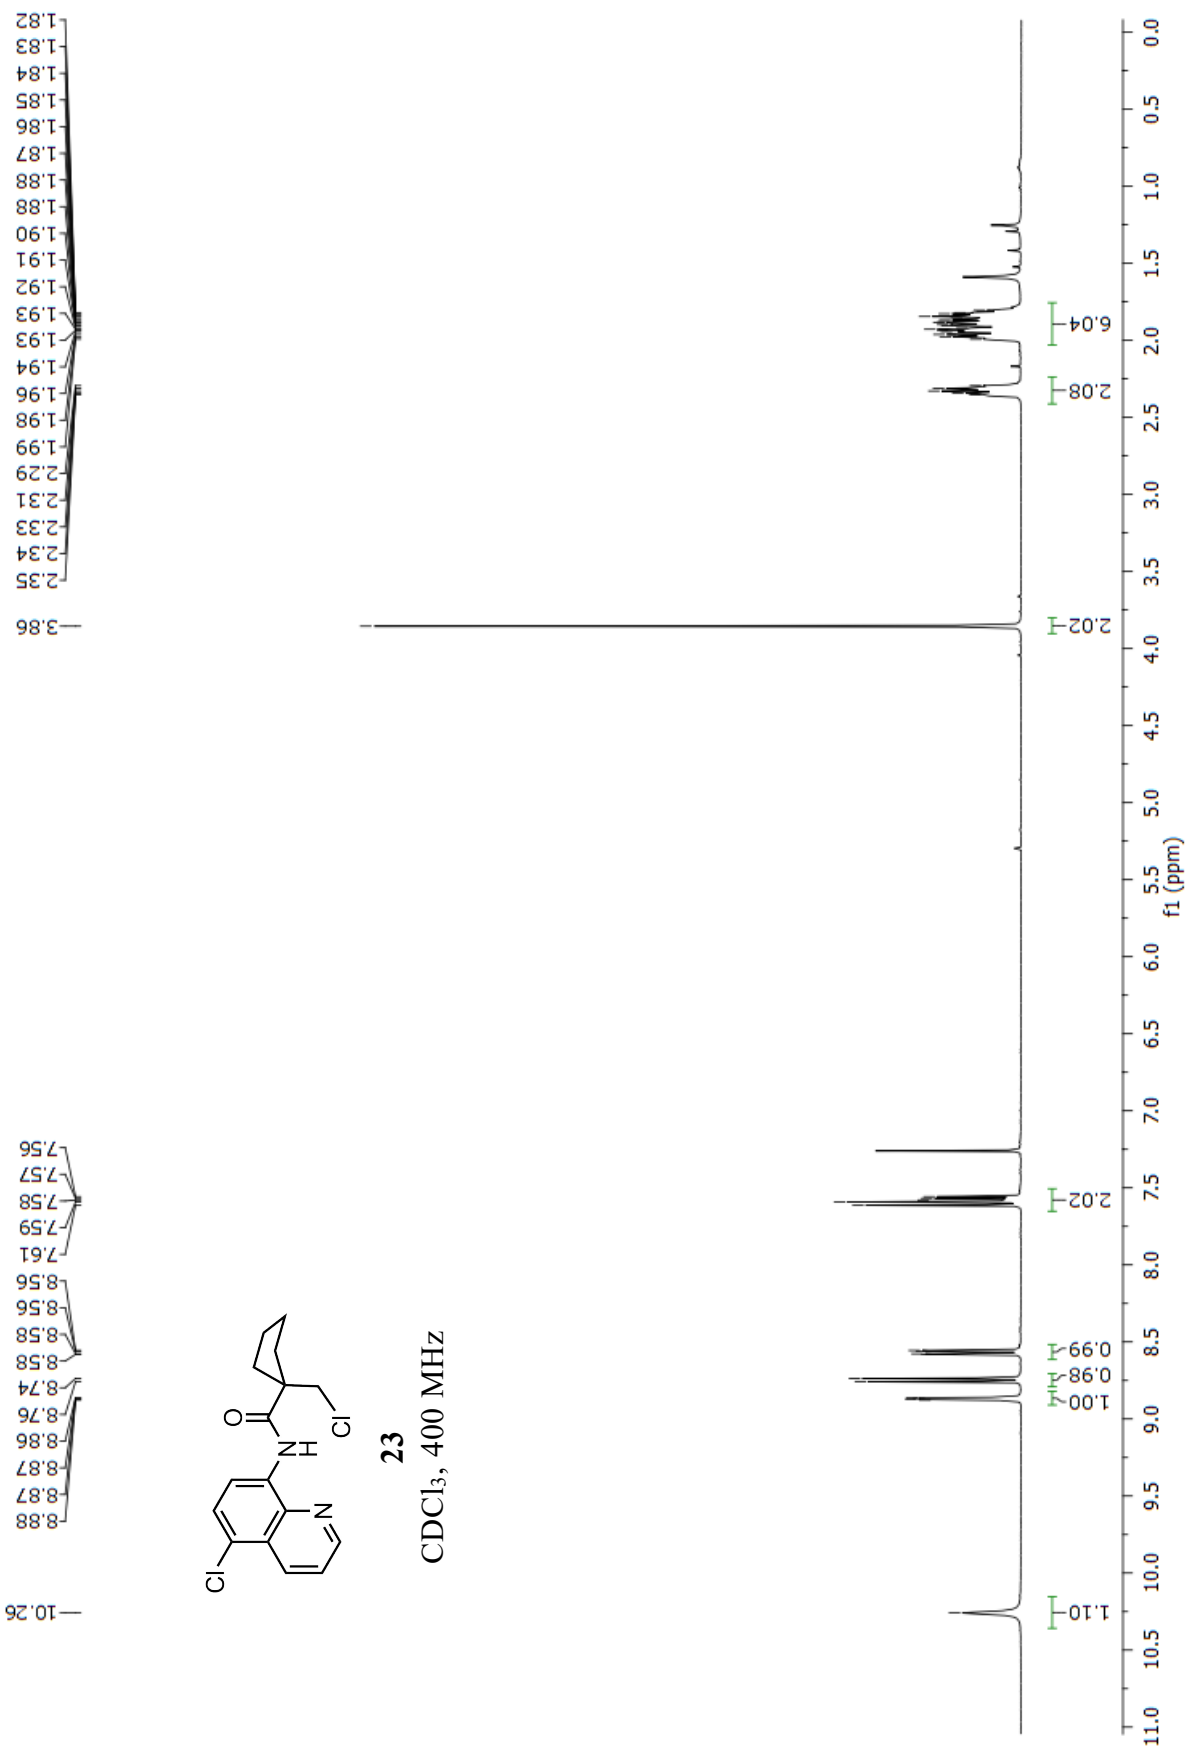

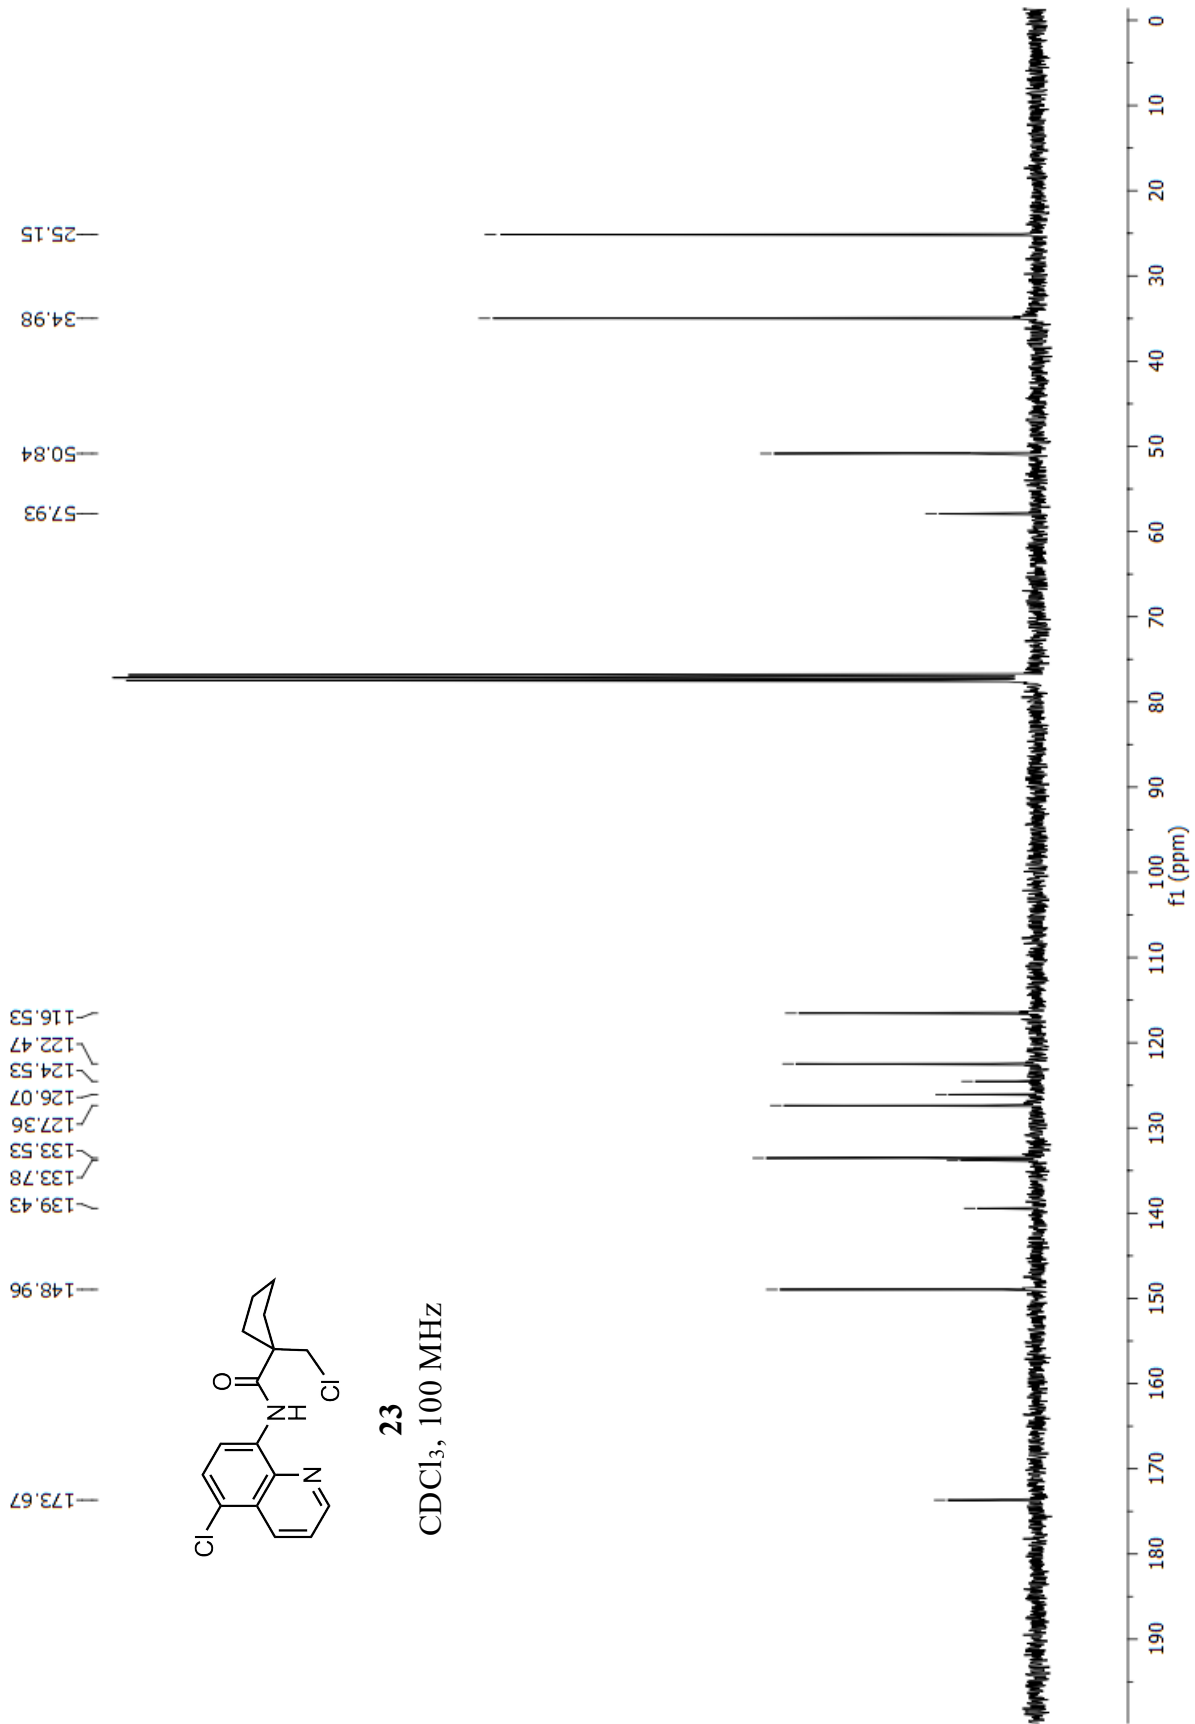

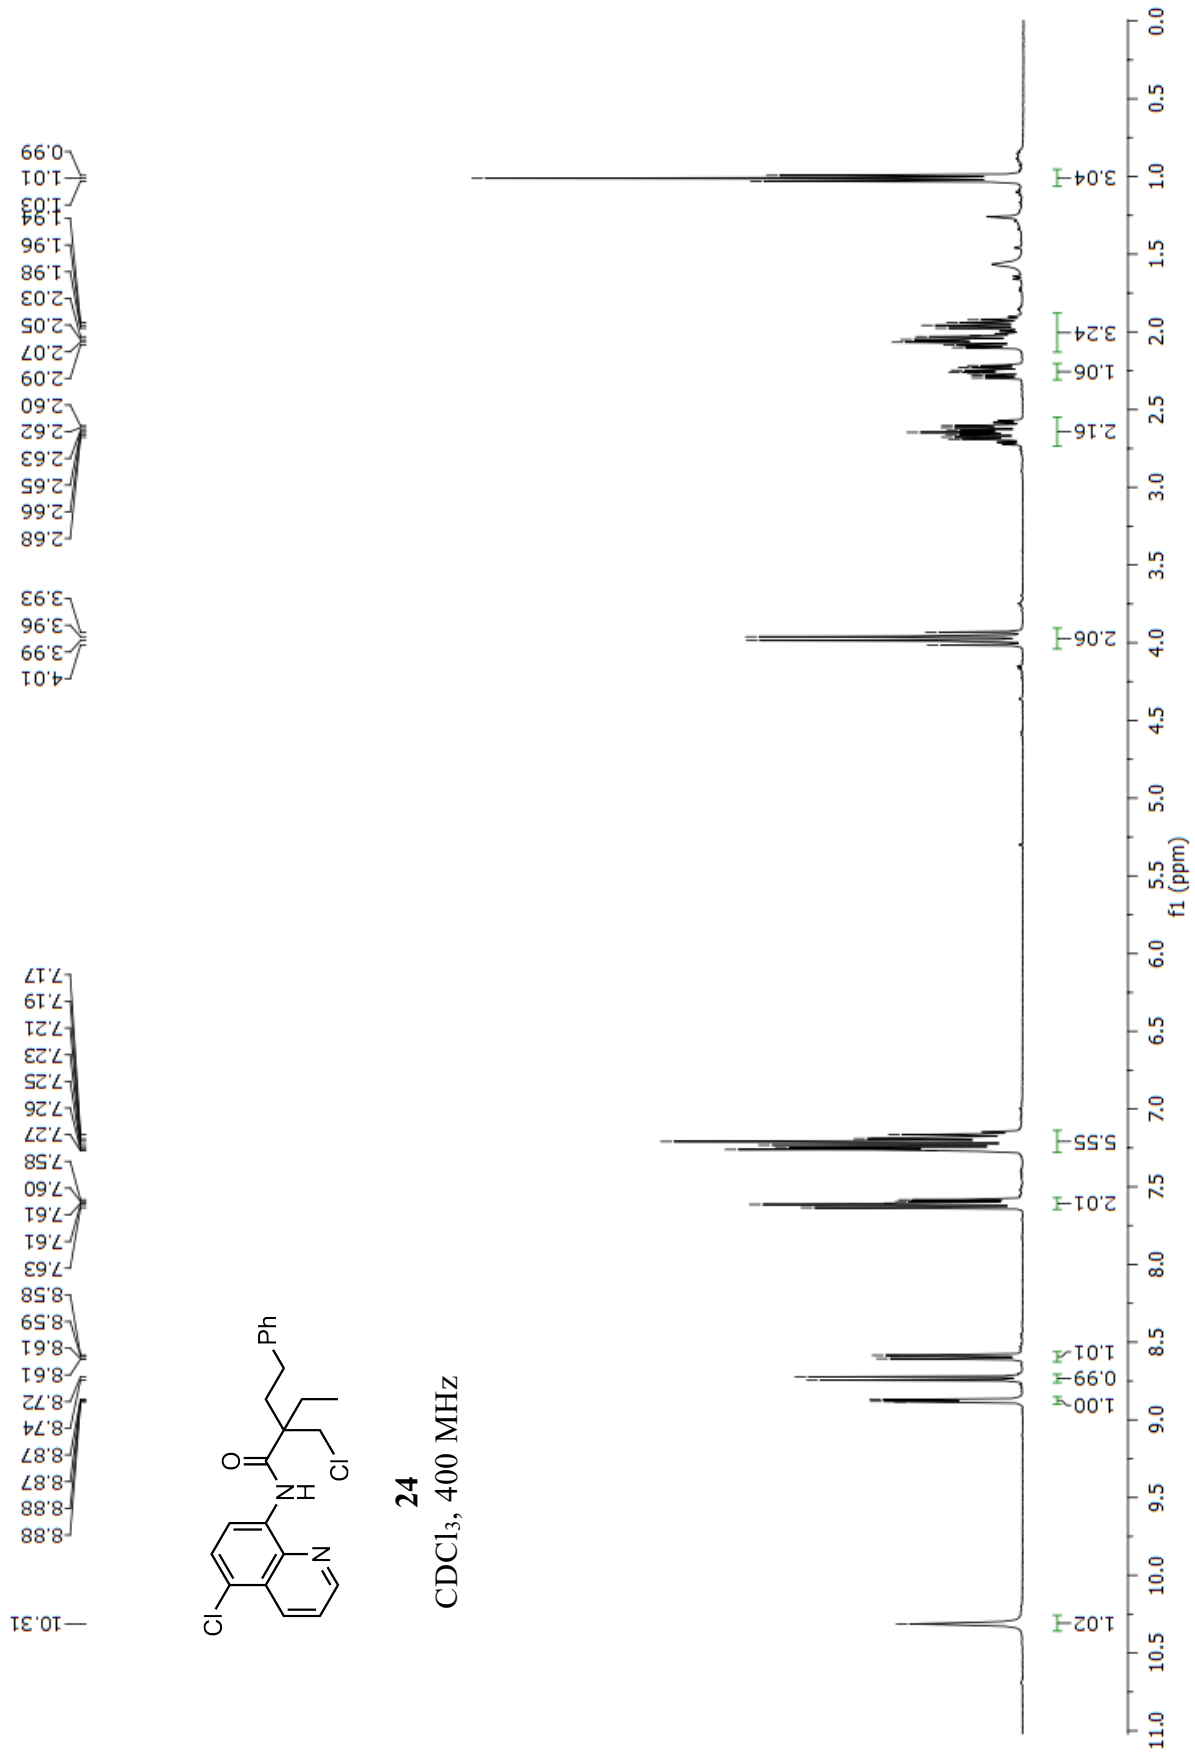

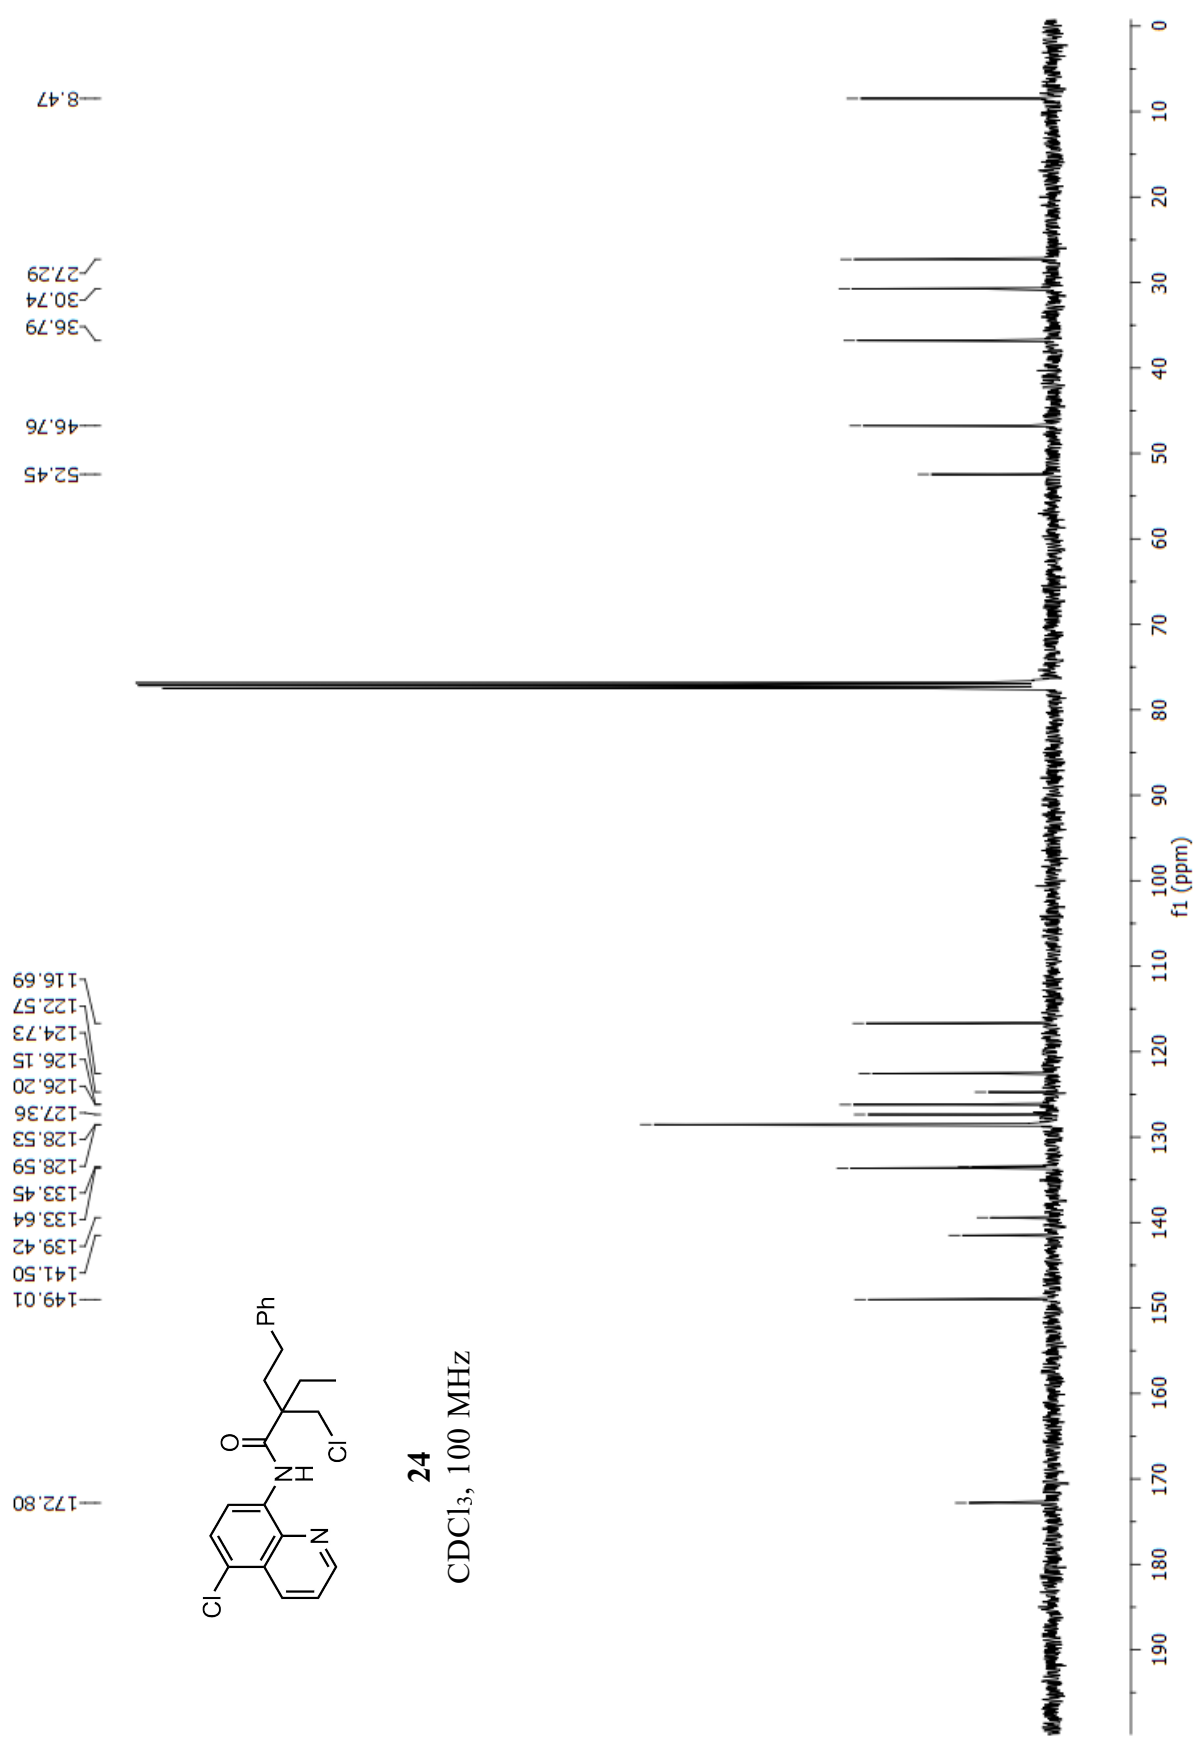

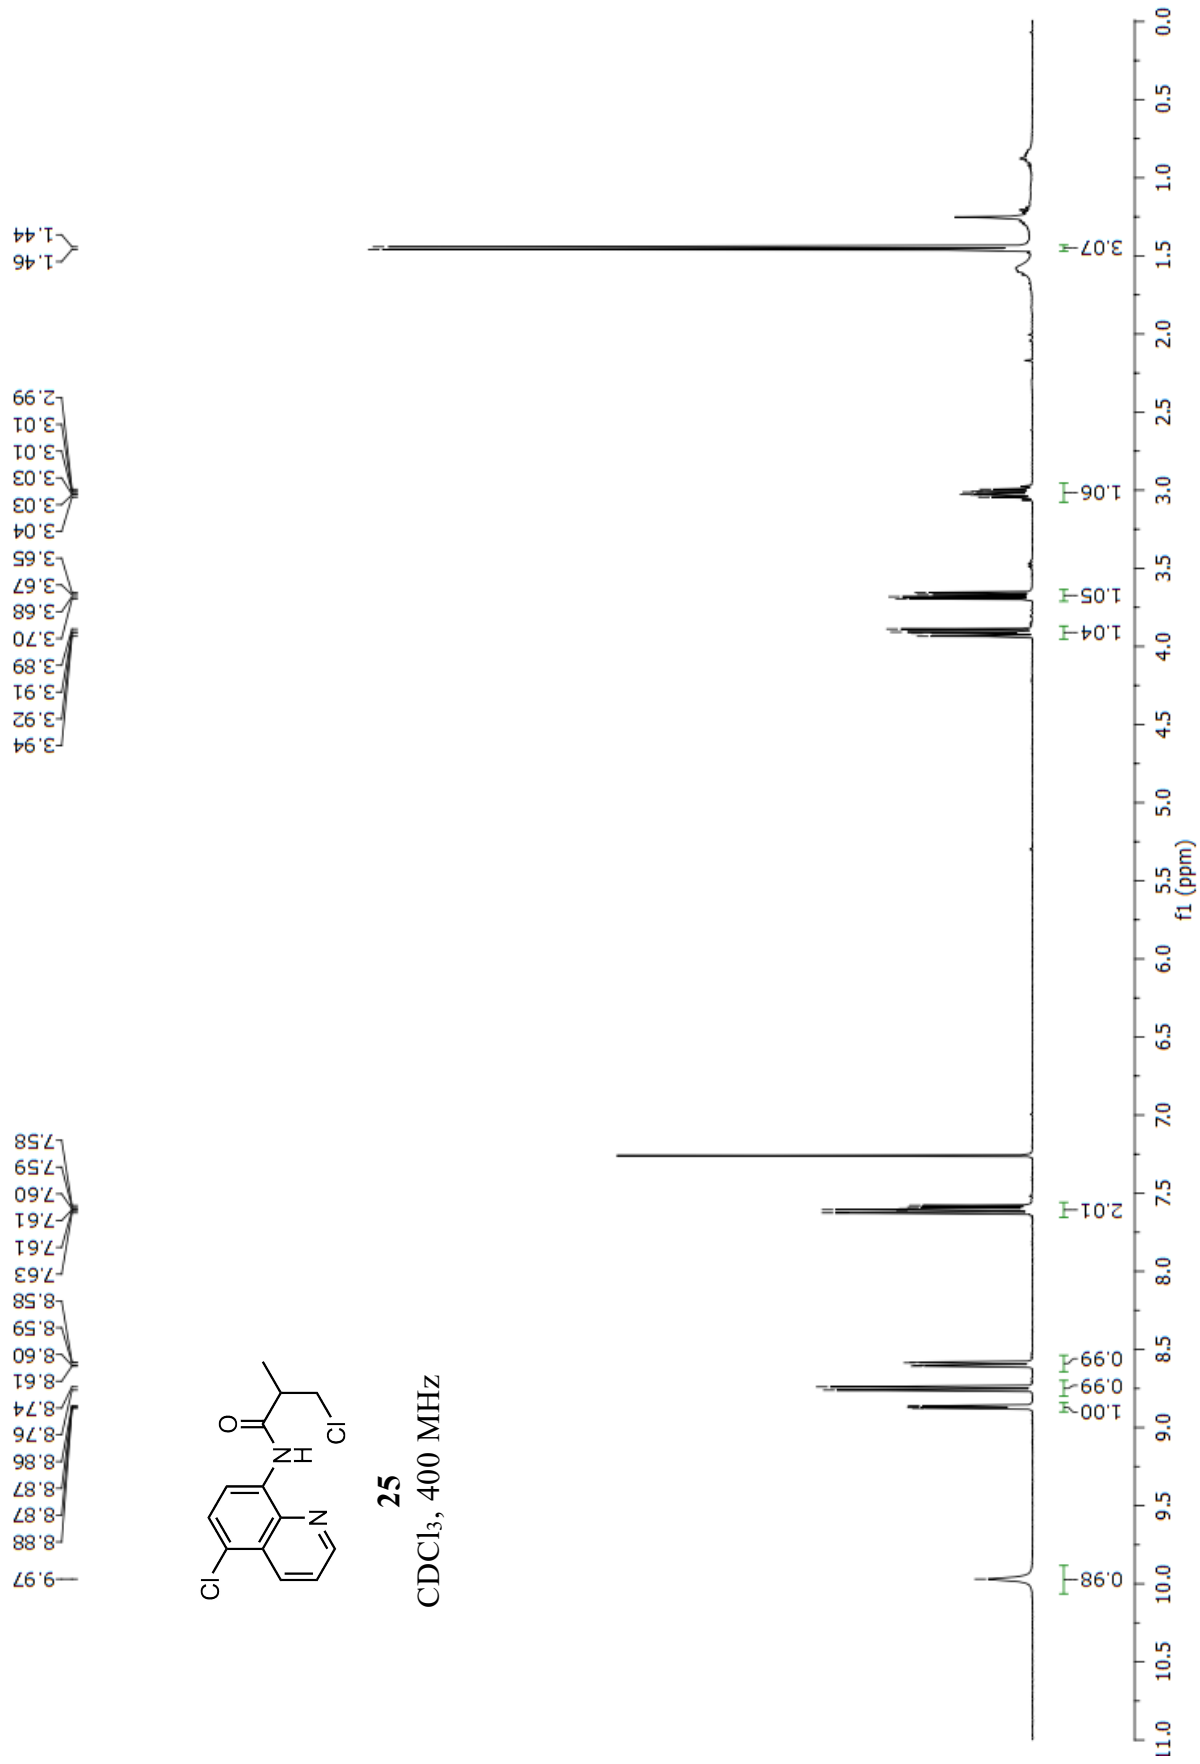

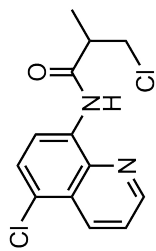

25

CDCl<sub>3</sub>, 100 MHz

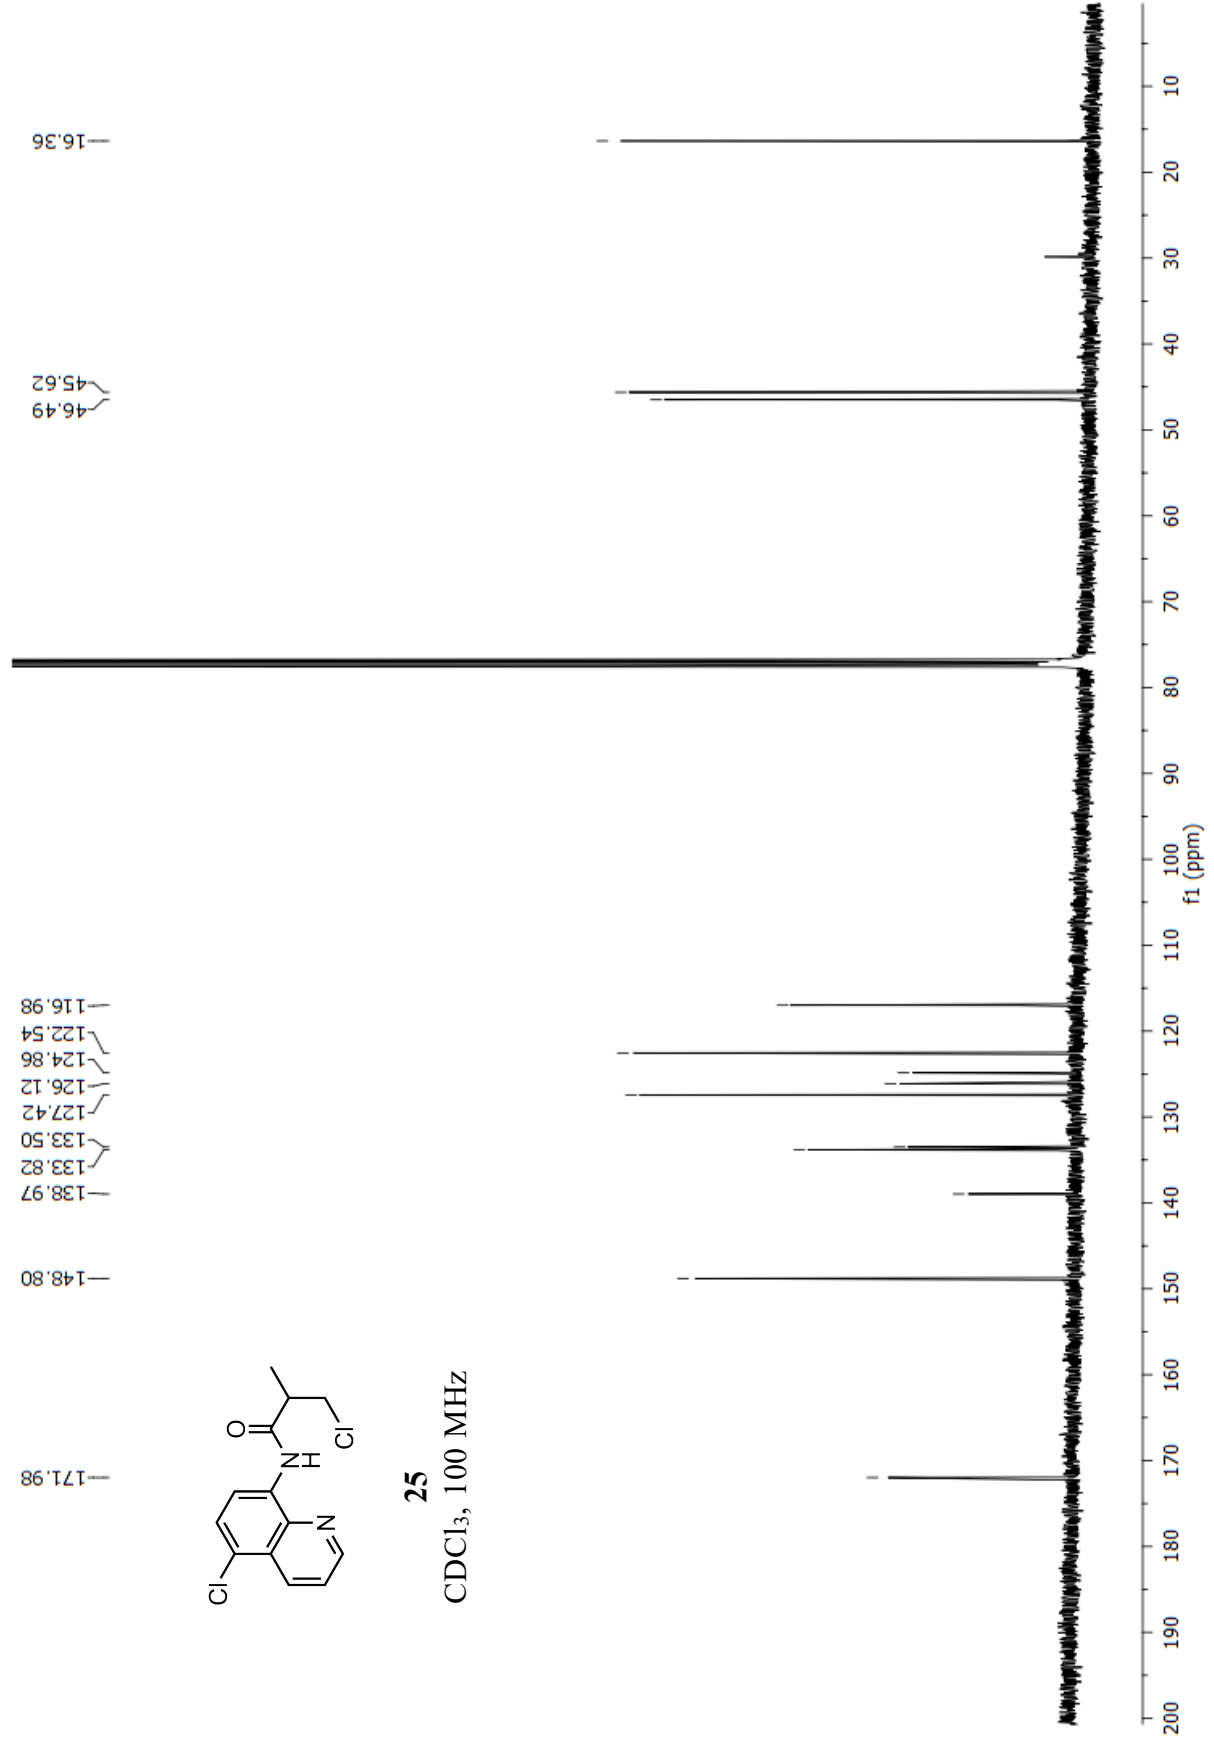



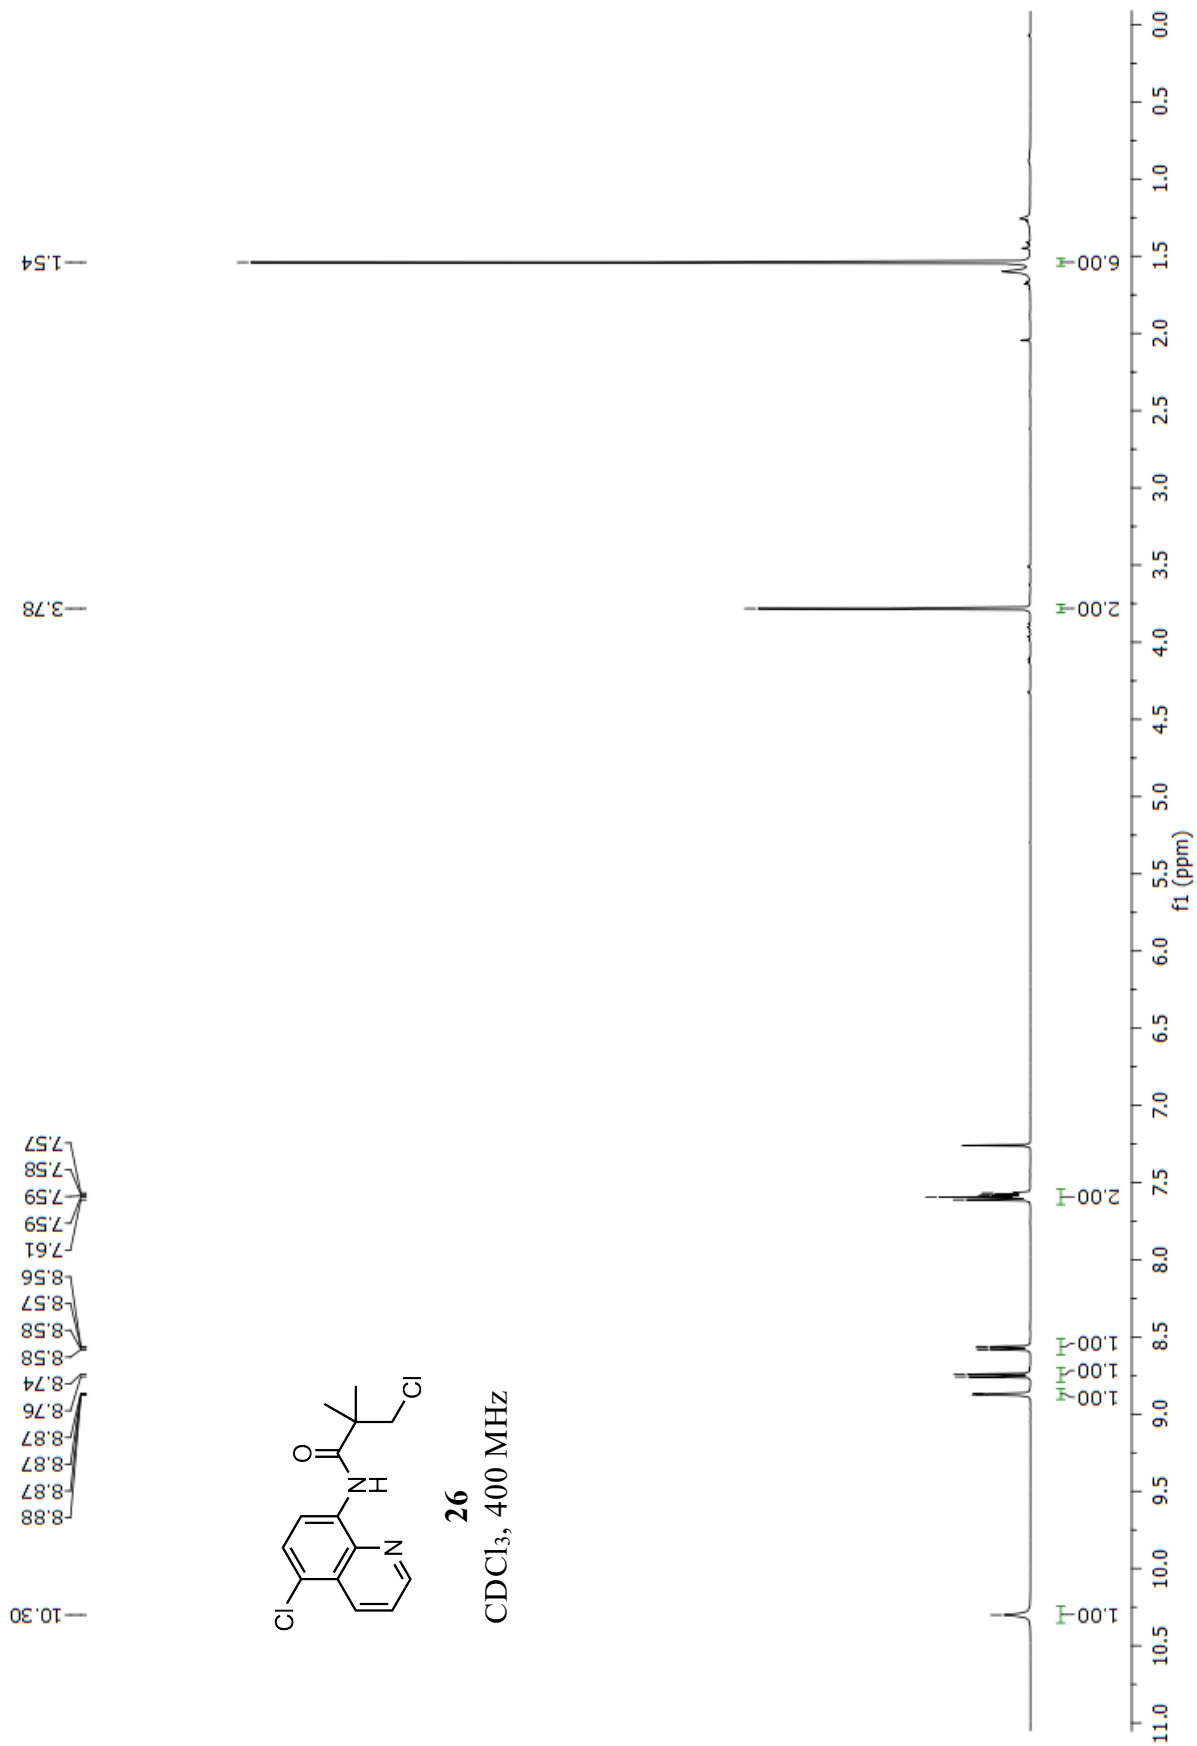

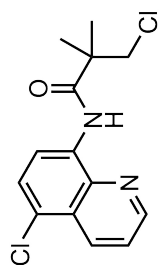

**26**

CDCl<sub>3</sub>, 100 MHz

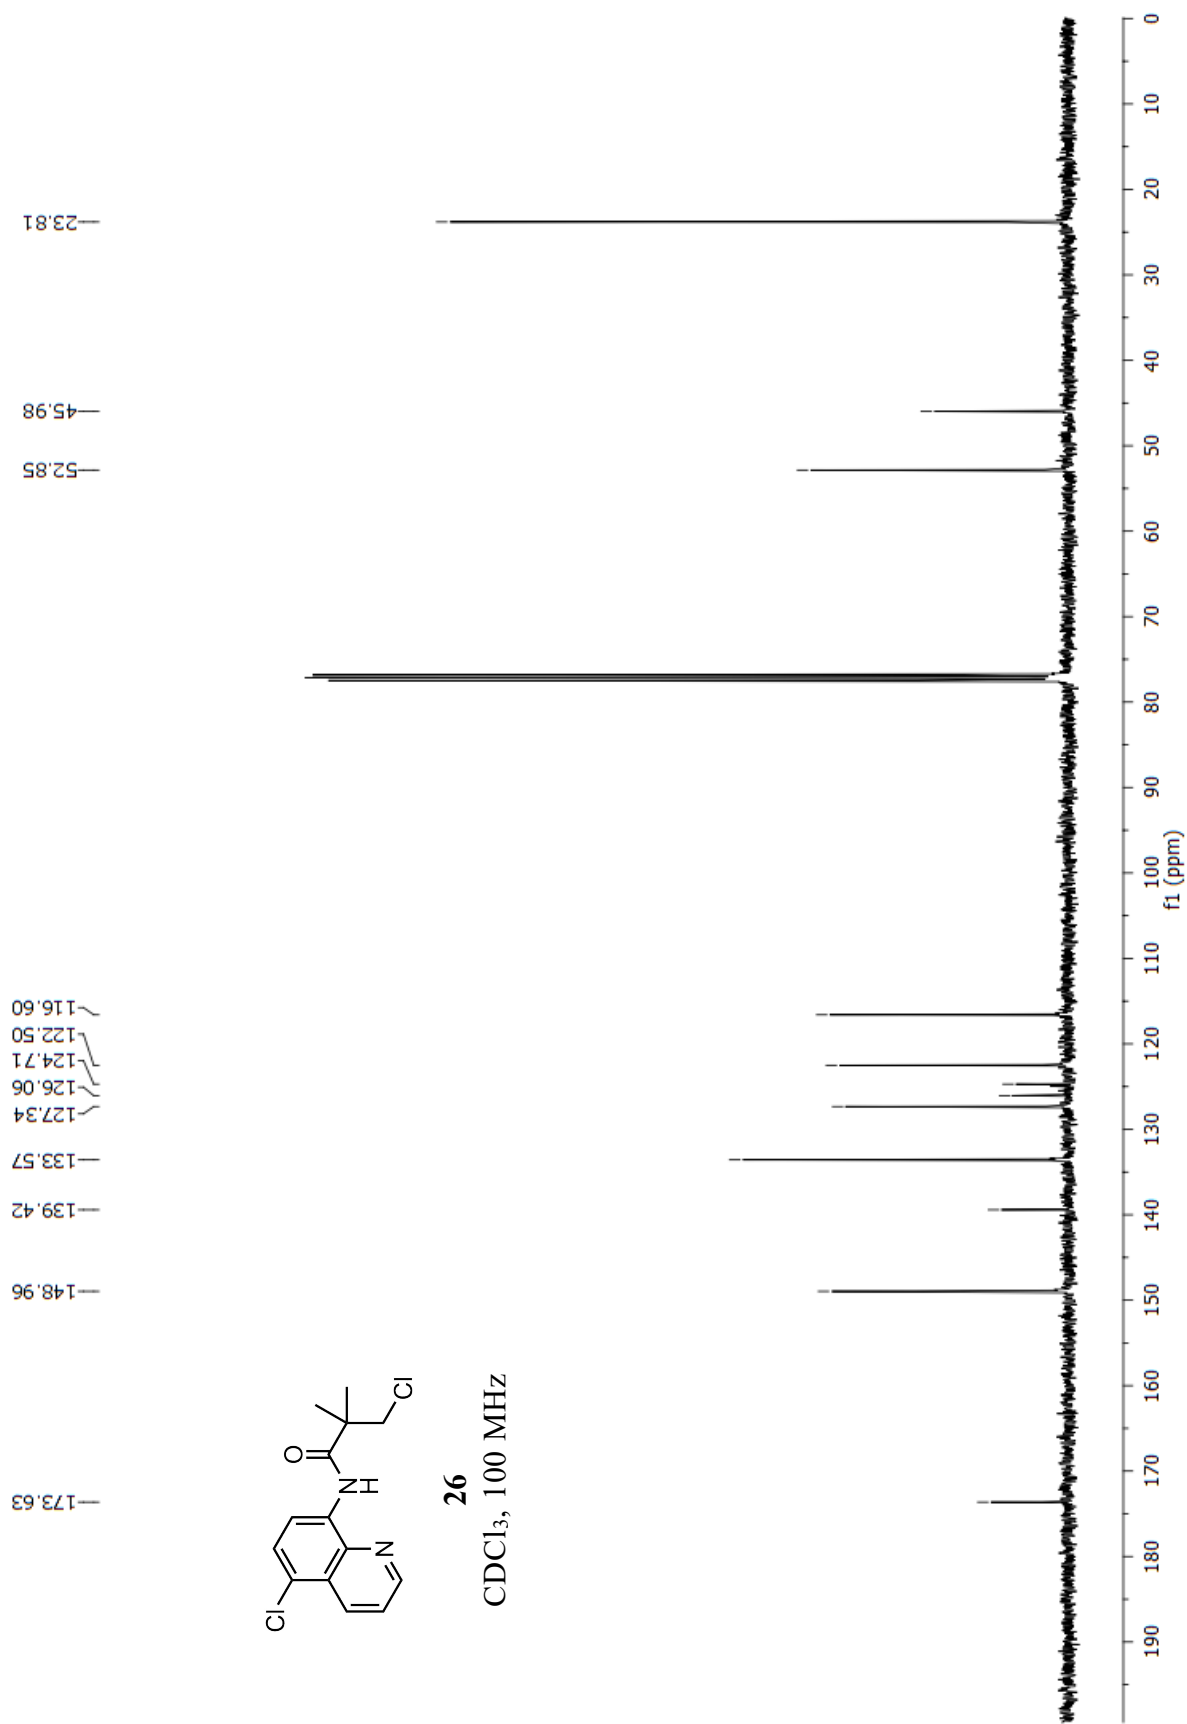

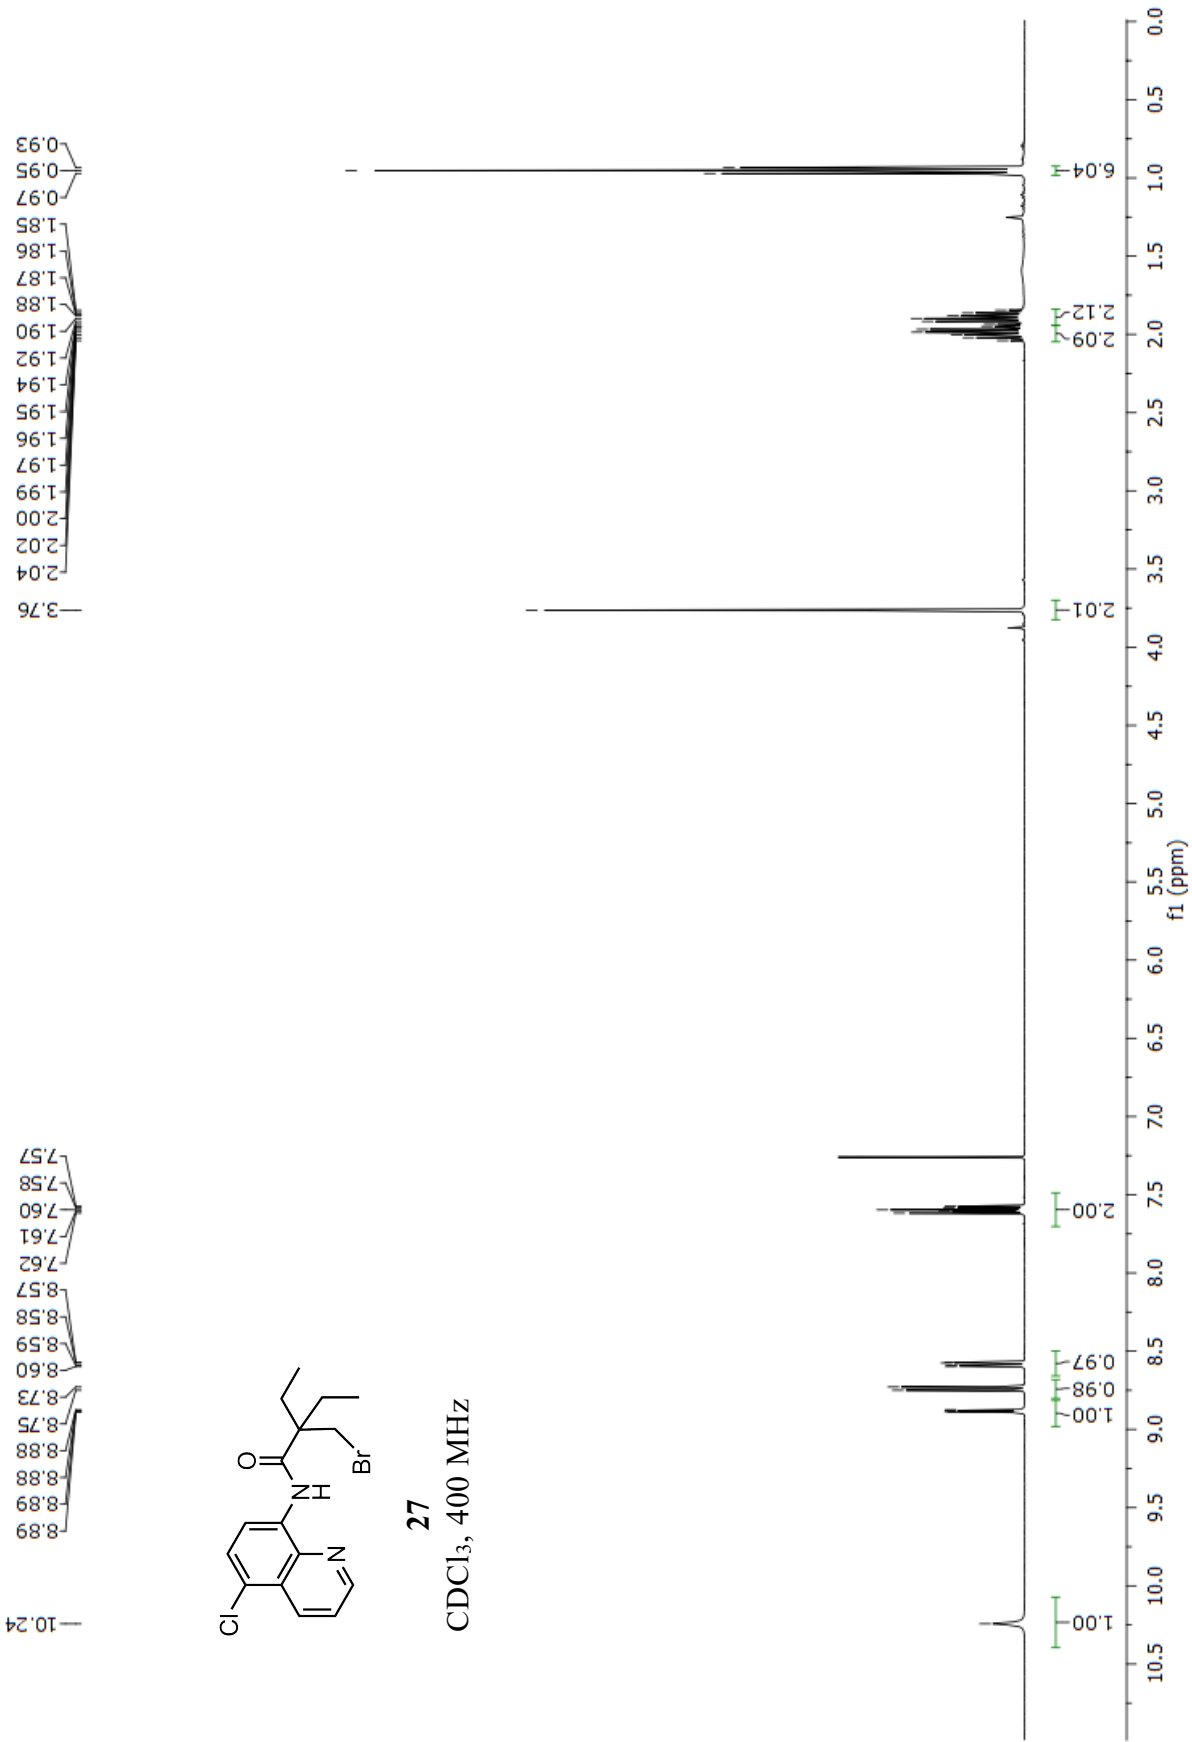

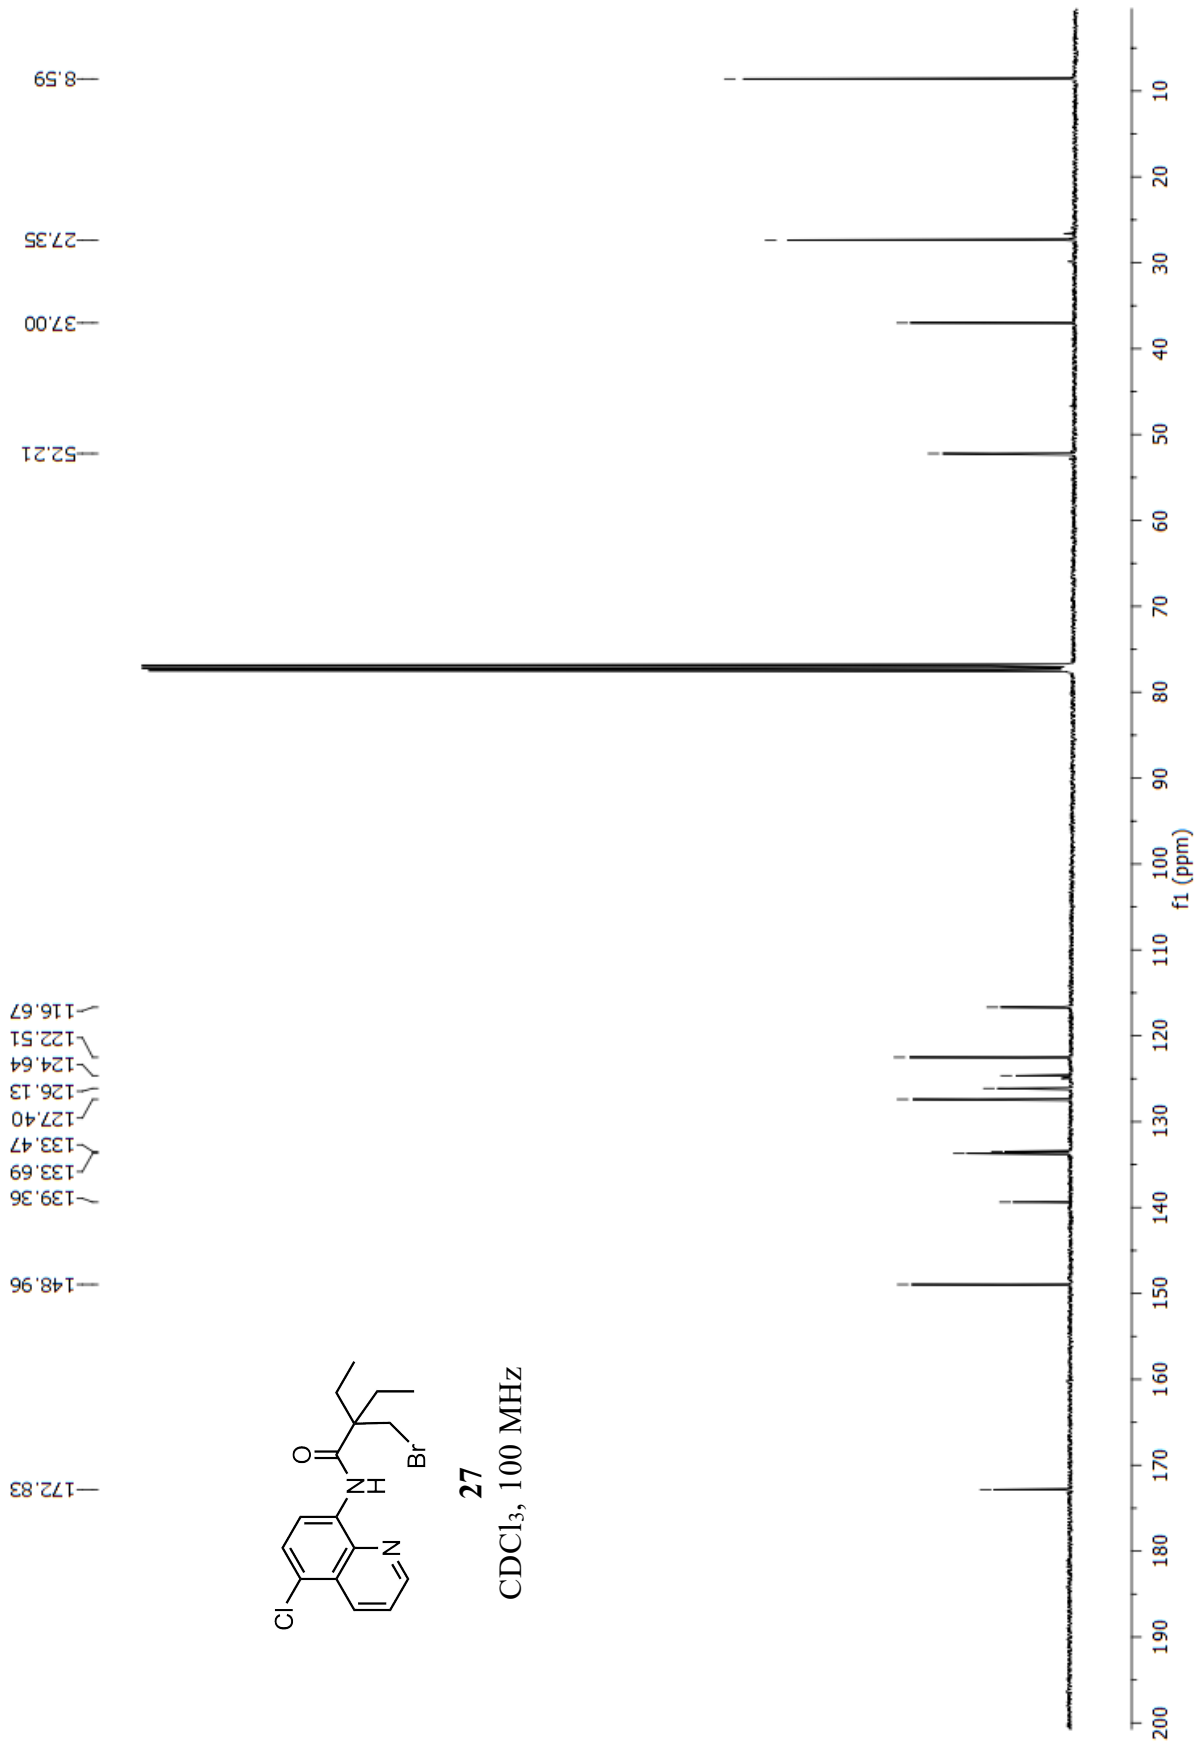

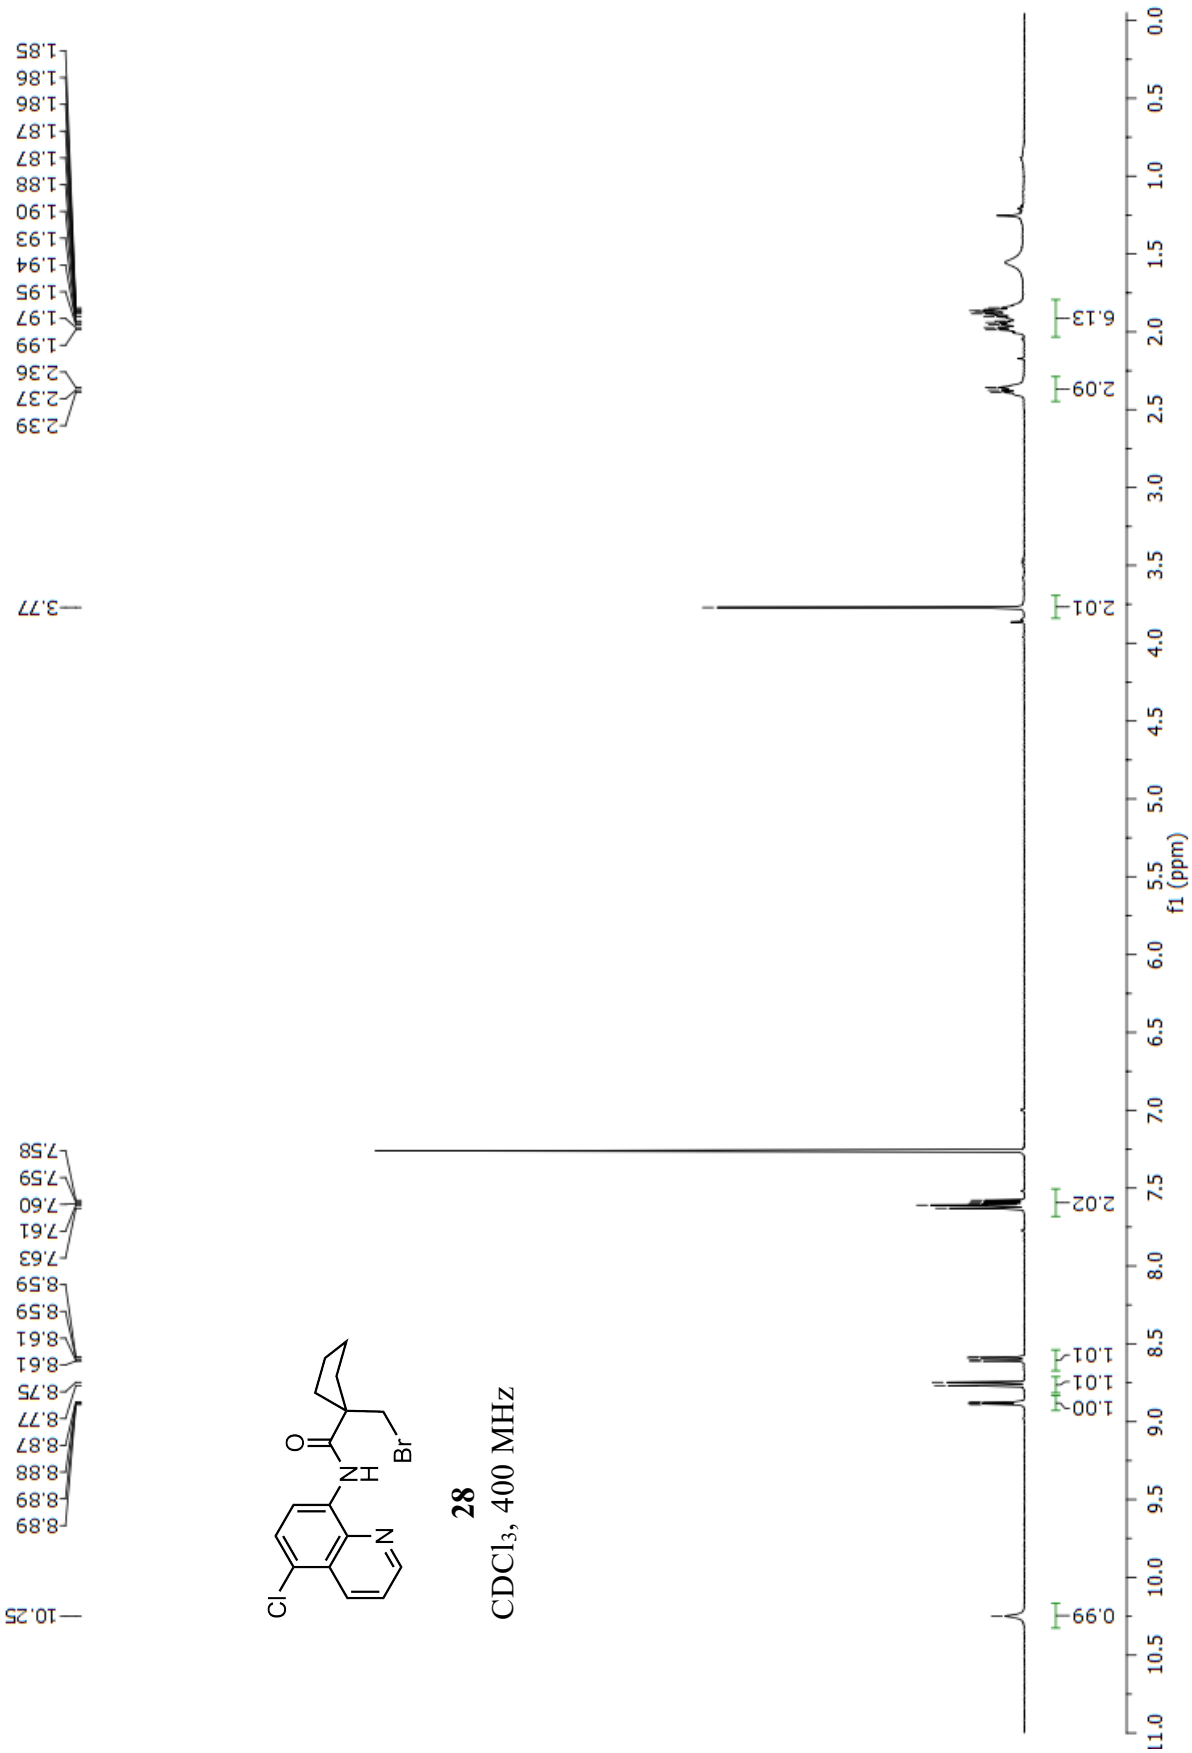

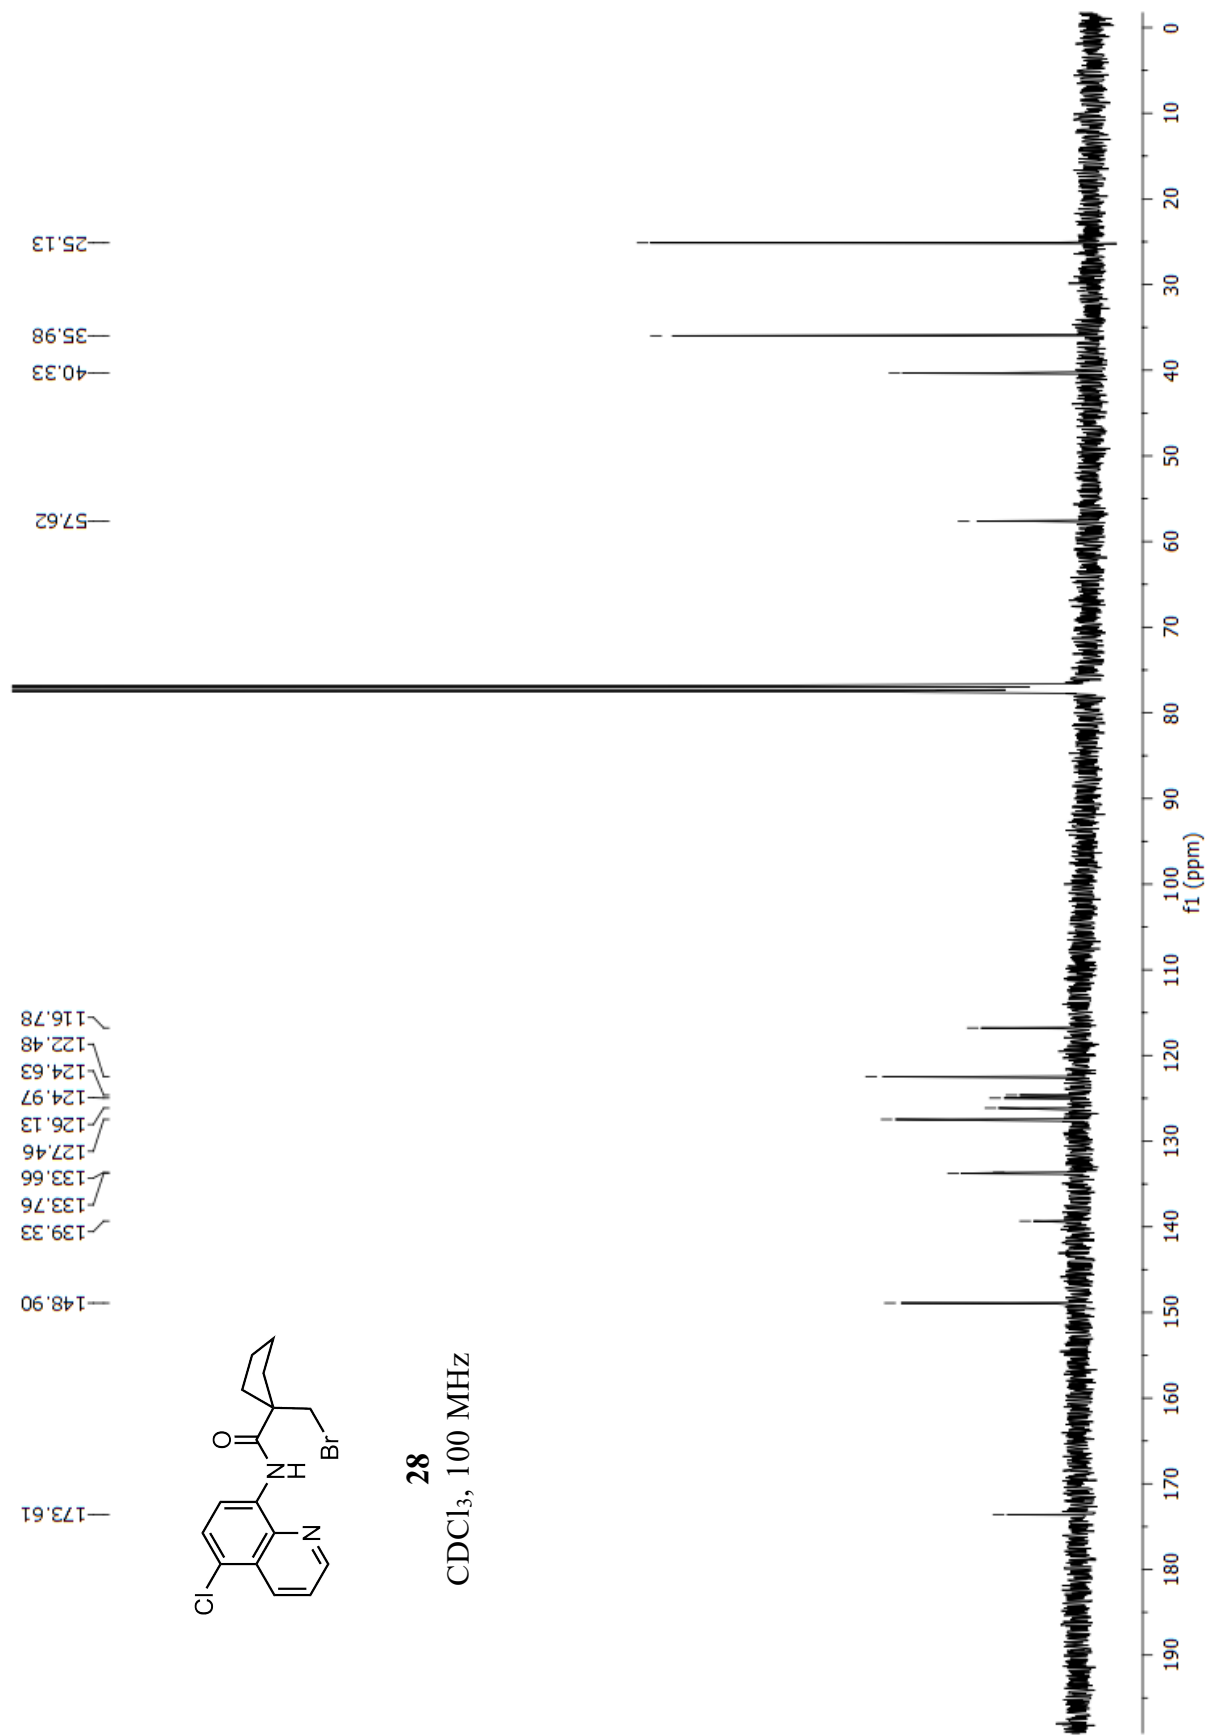



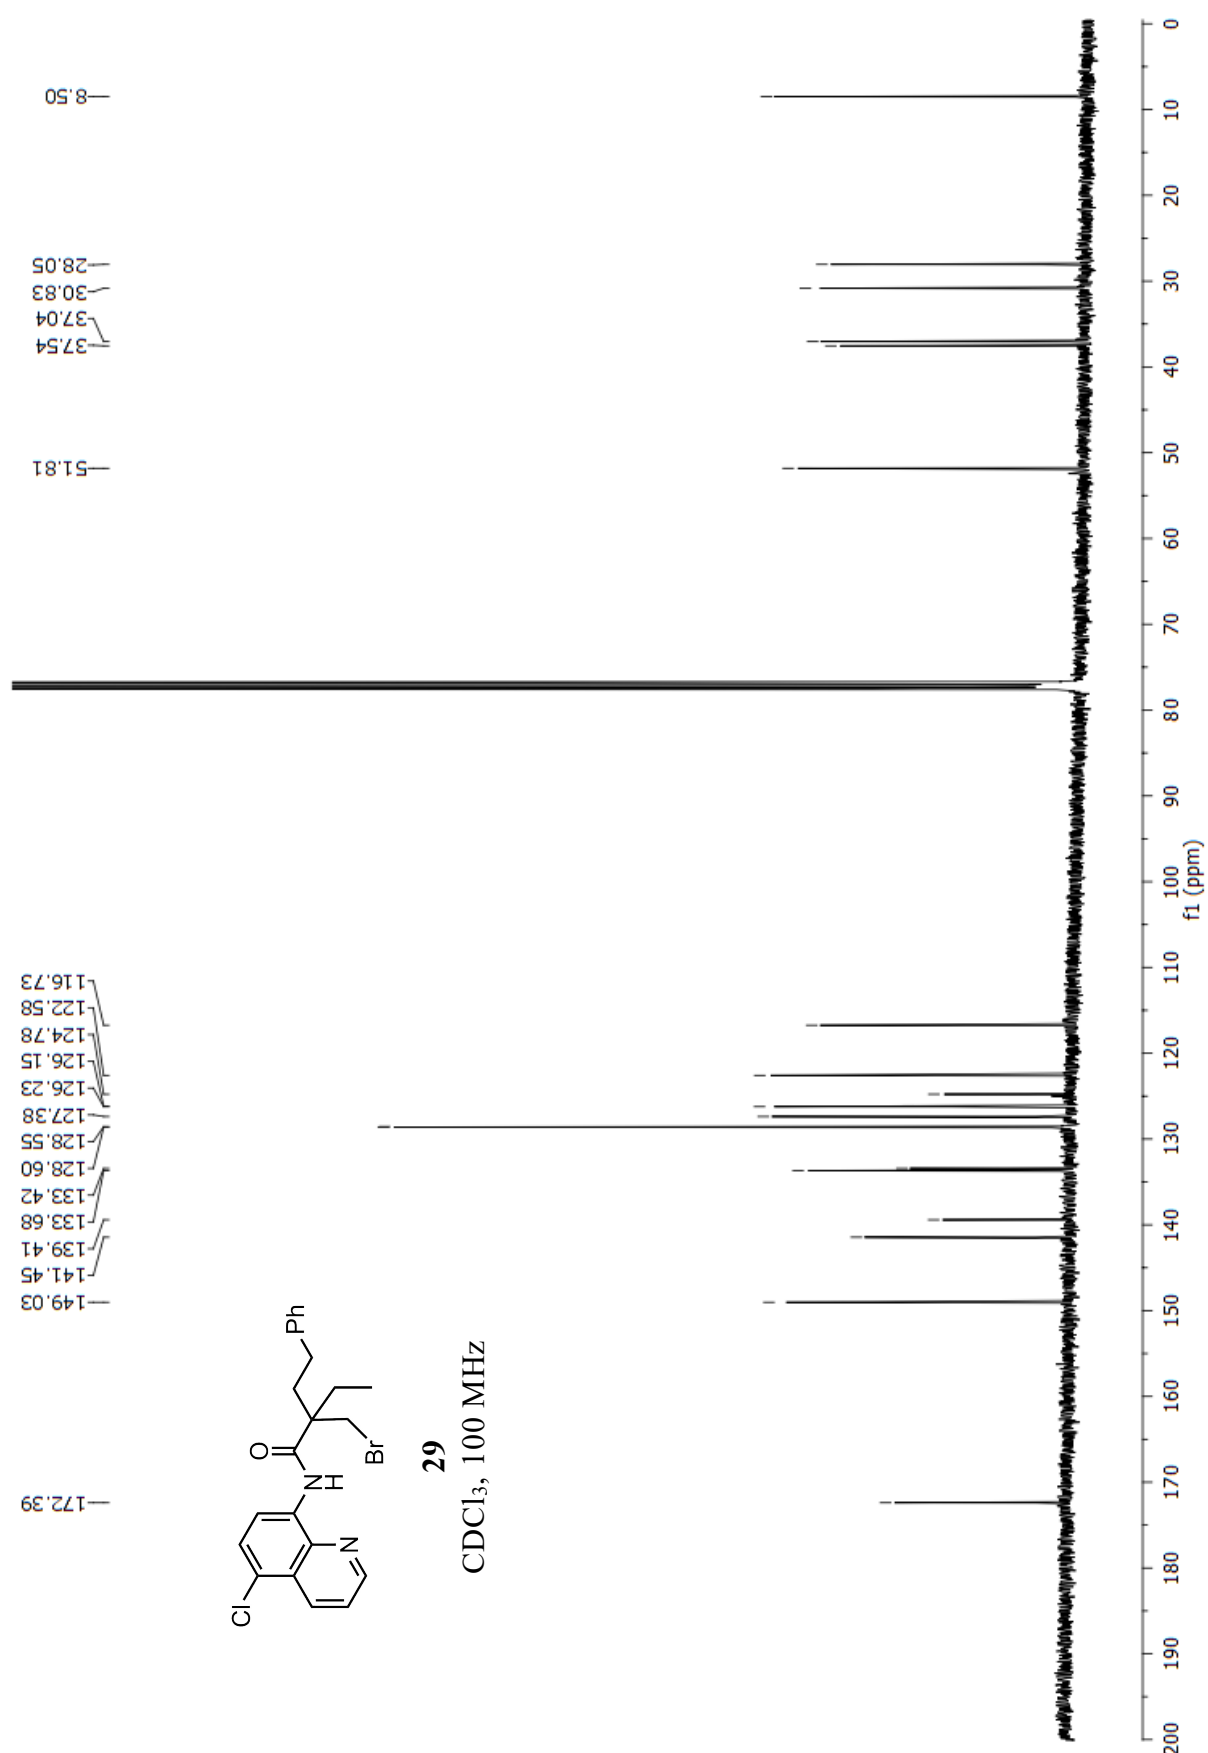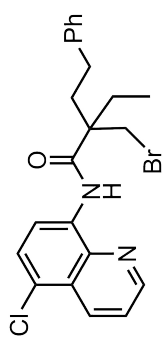

**29**  
CDCl<sub>3</sub>, 100 MHz



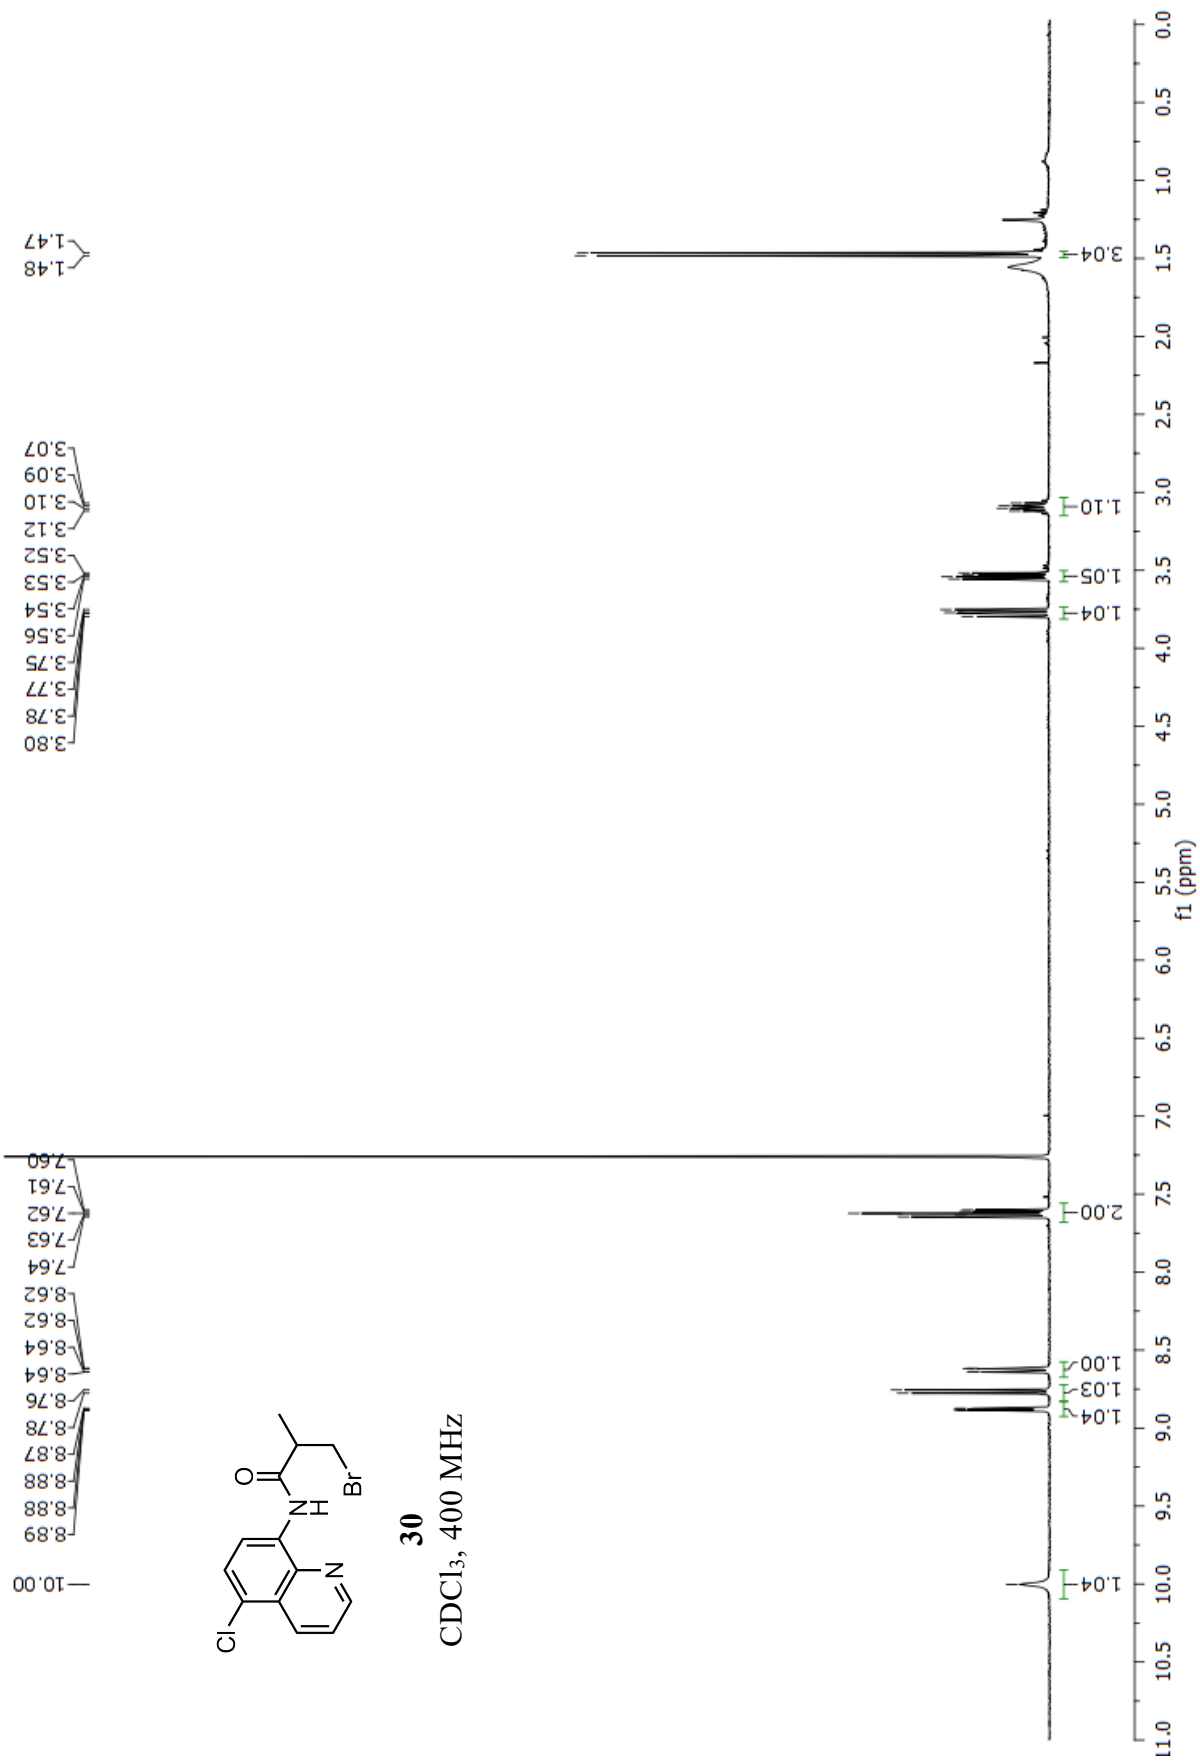

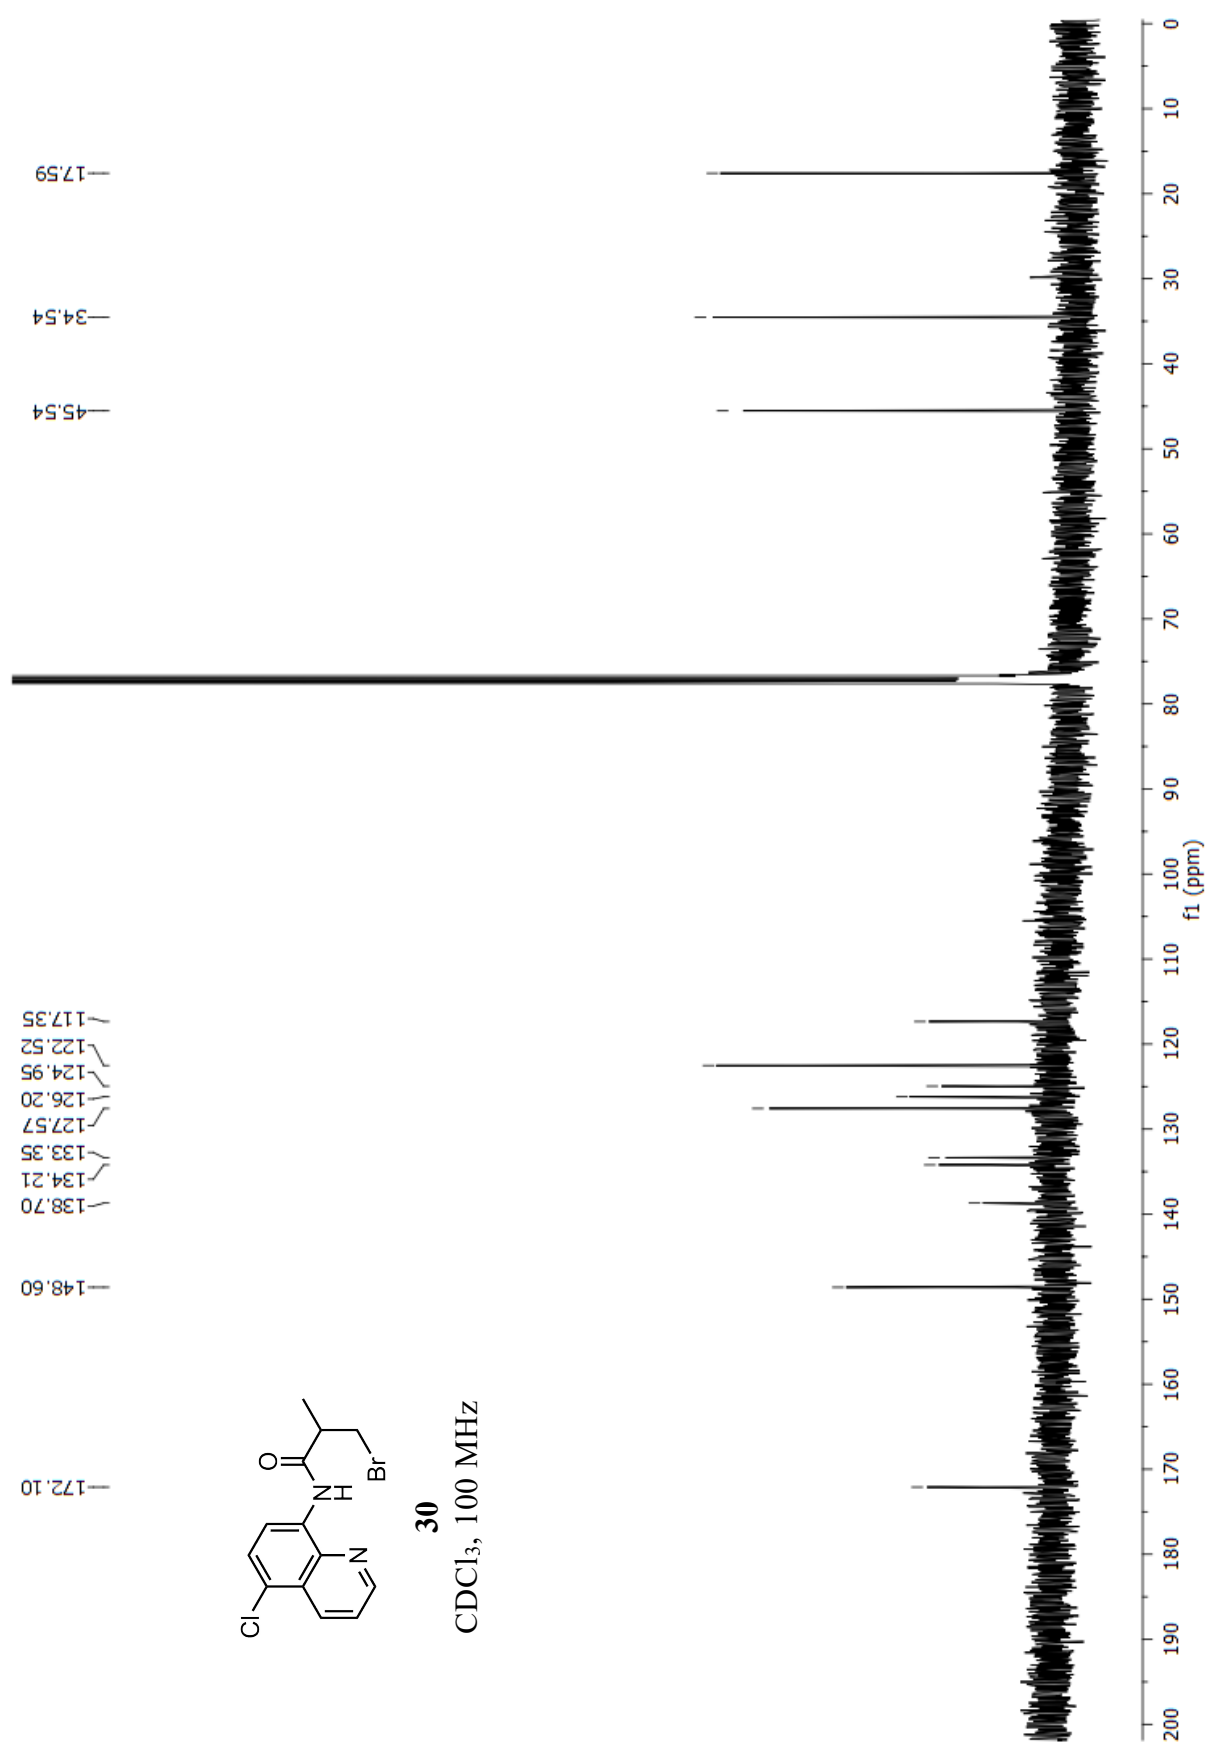

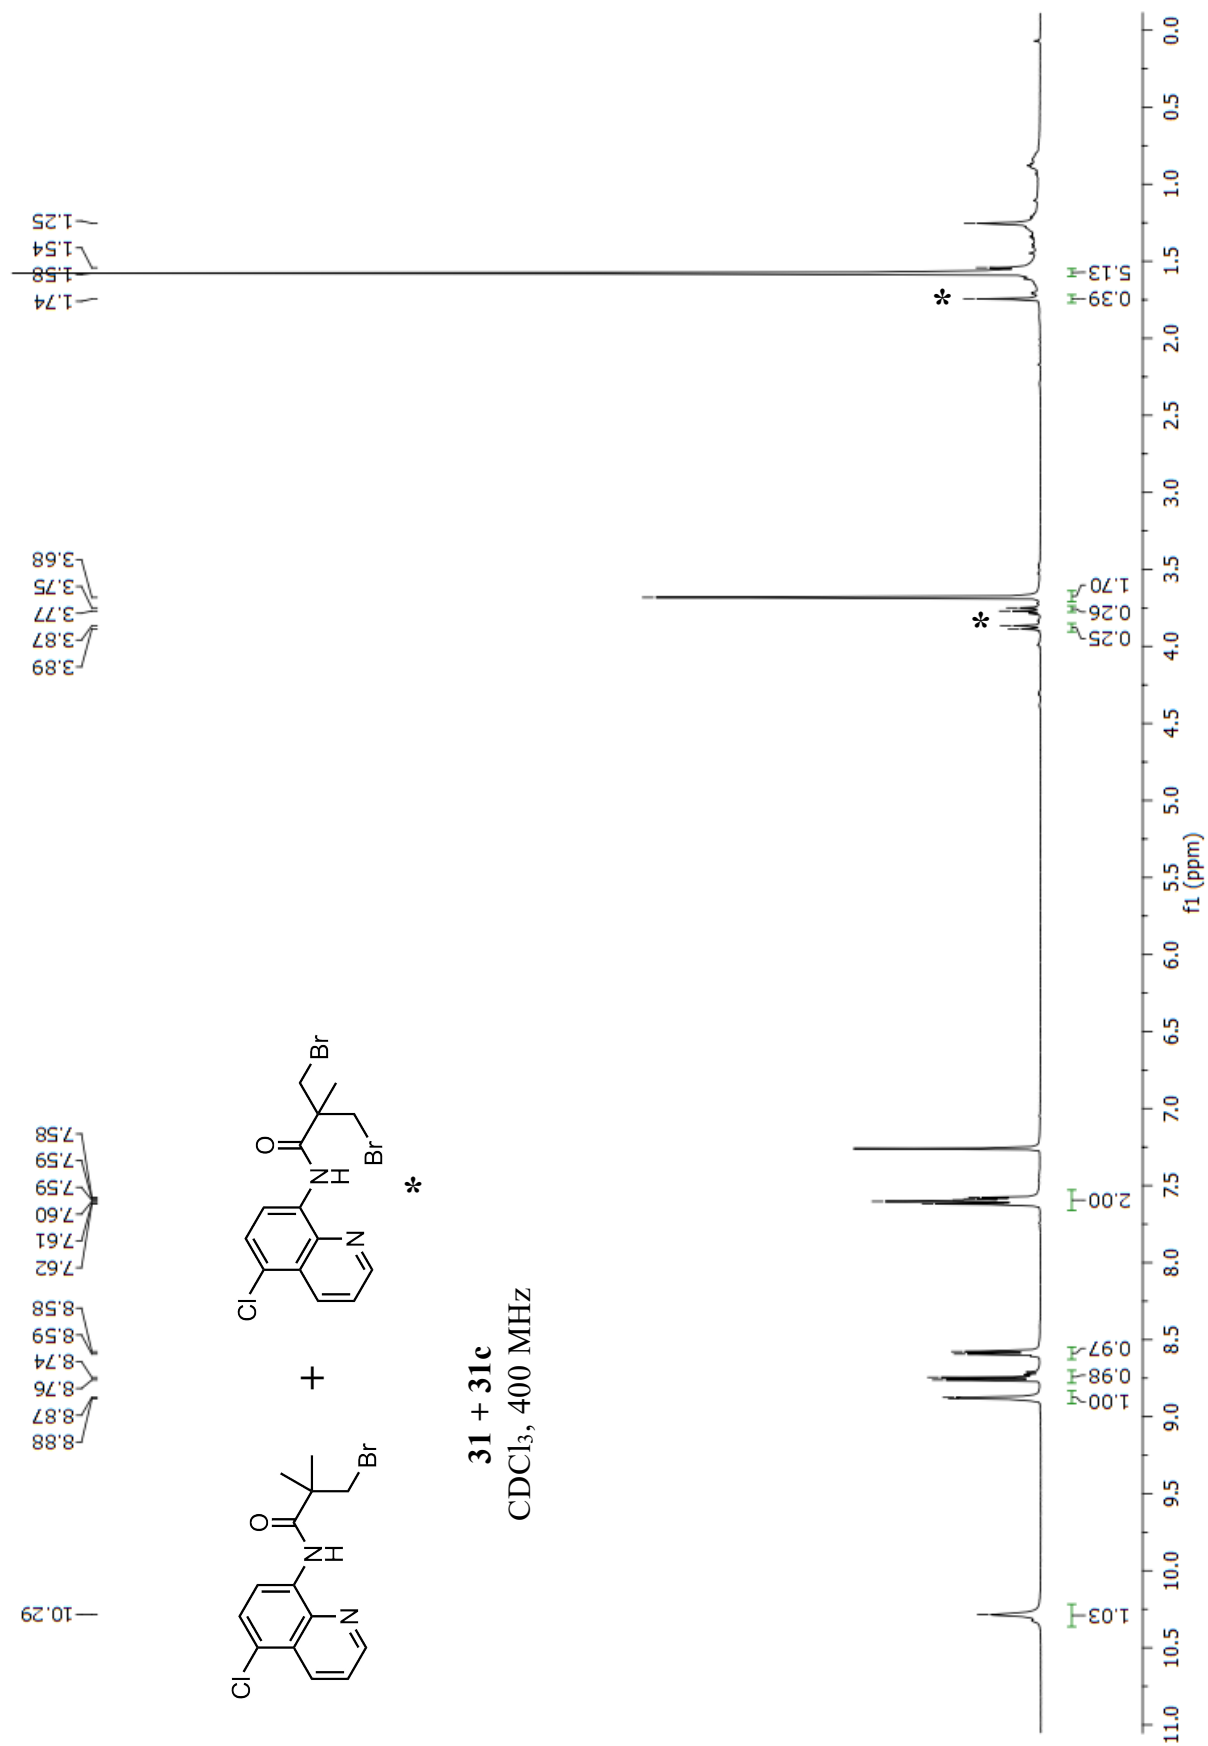

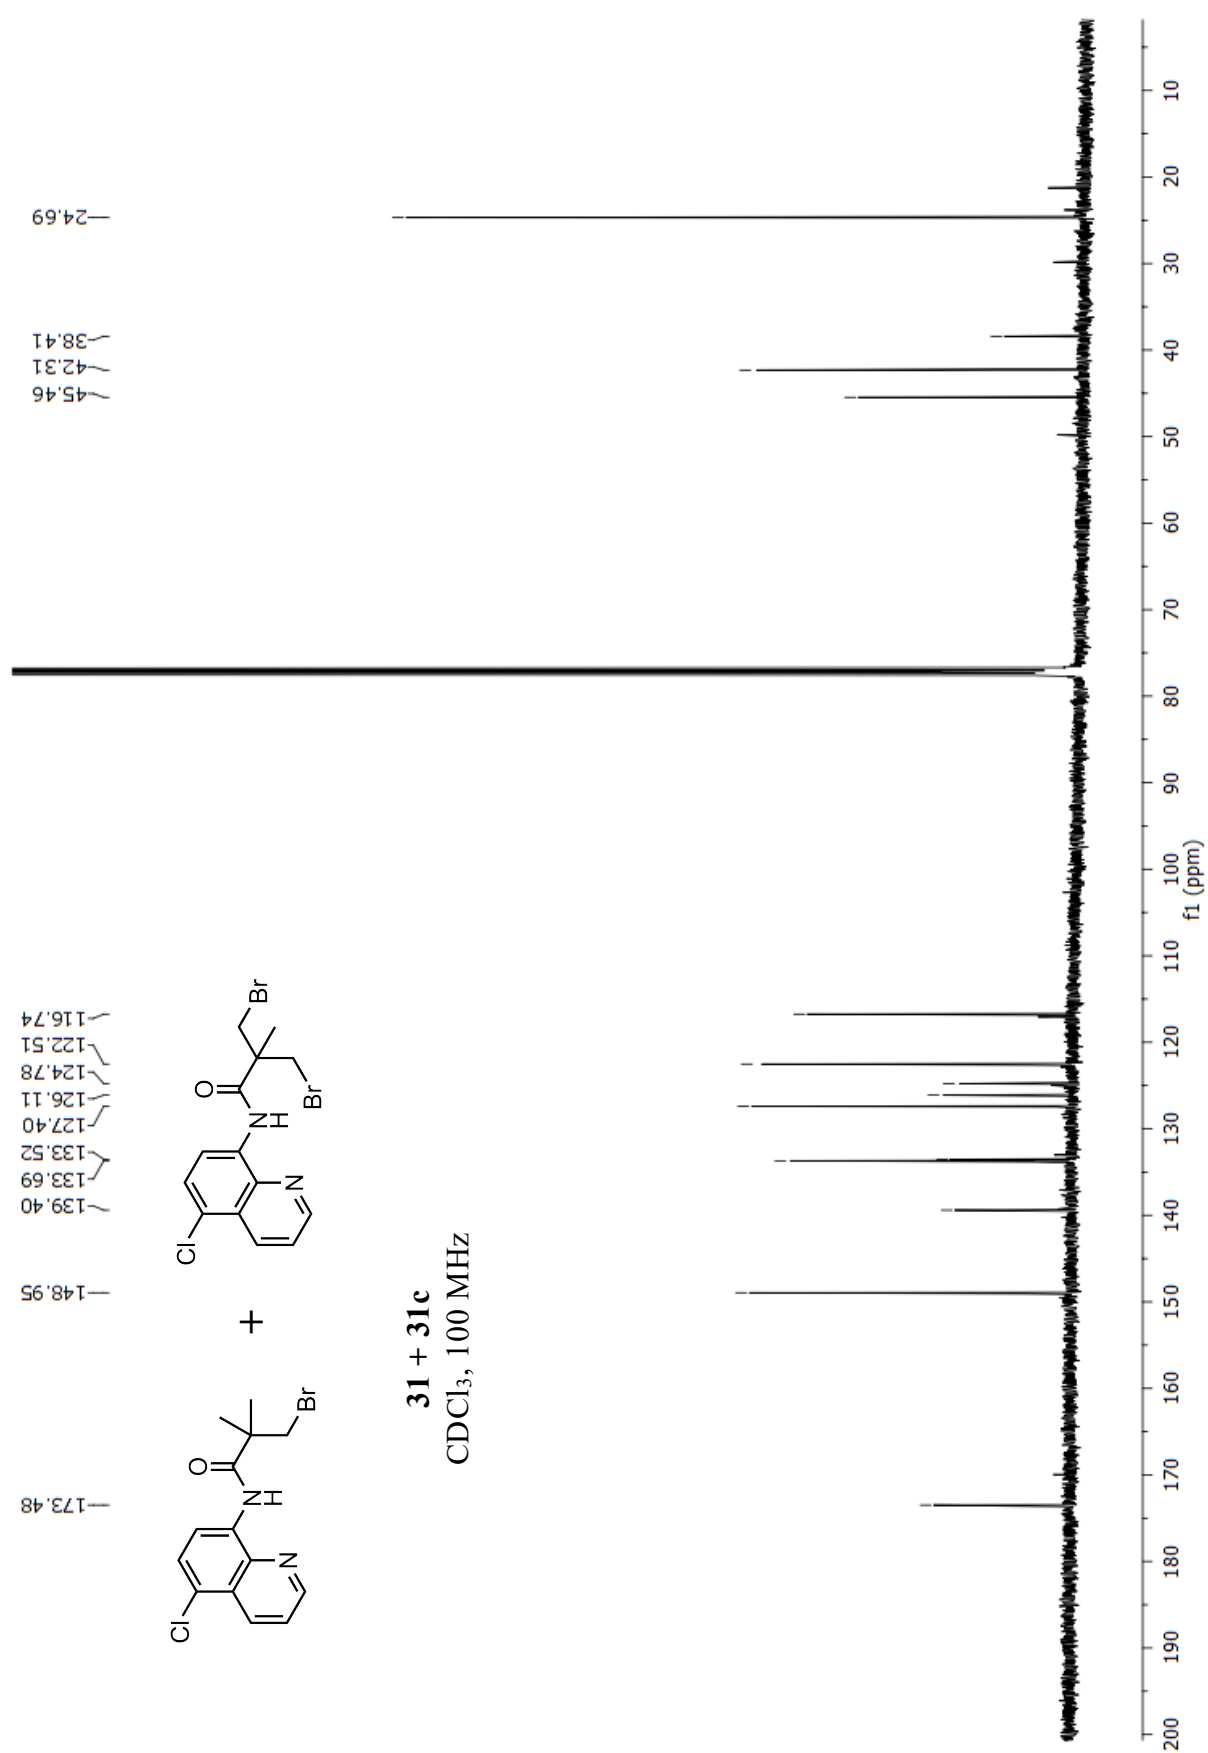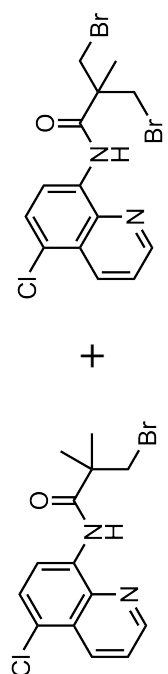

**31 + 31c**  
CDCl<sub>3</sub>, 100 MHz

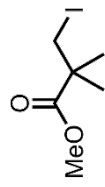

**37a**

CDCl<sub>3</sub>, 400 MHz

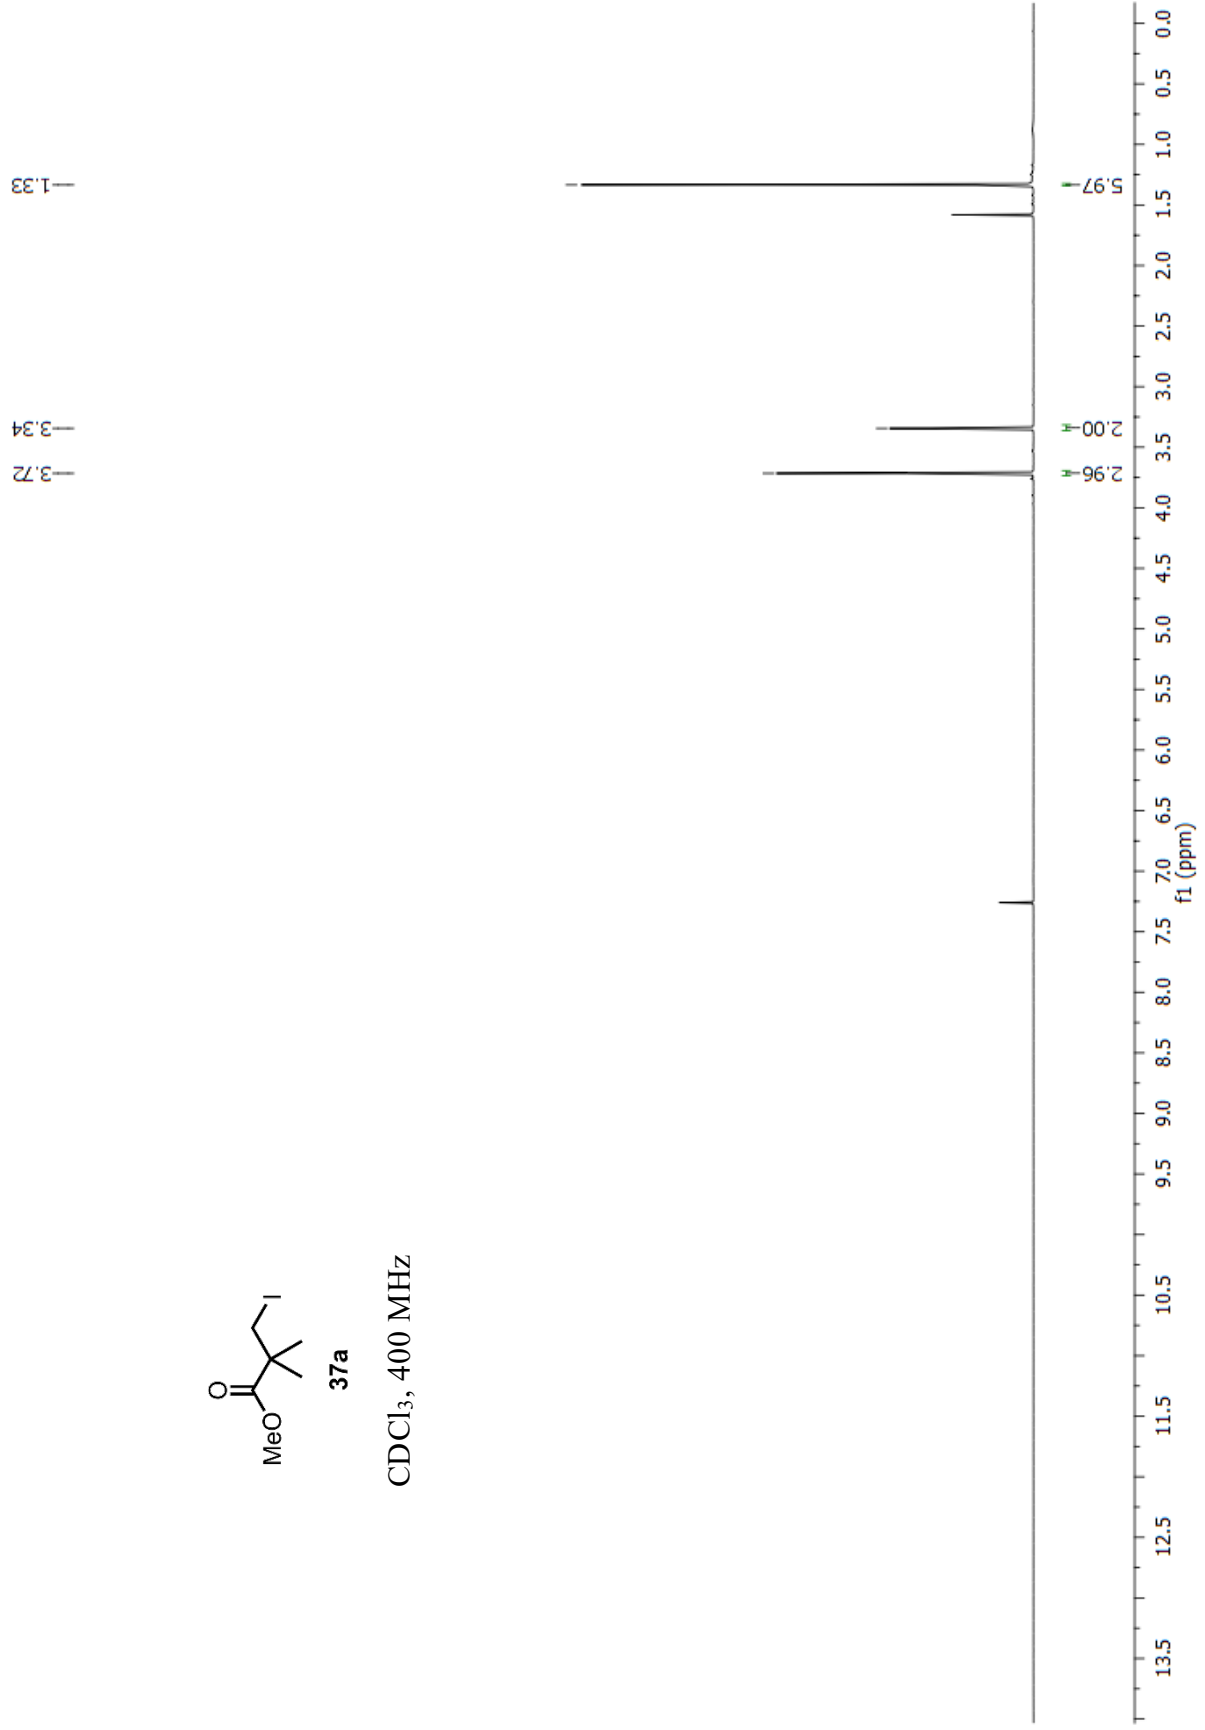

—174.17

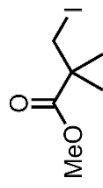

**37a**

$\text{CDCl}_3$ , 100 MHz

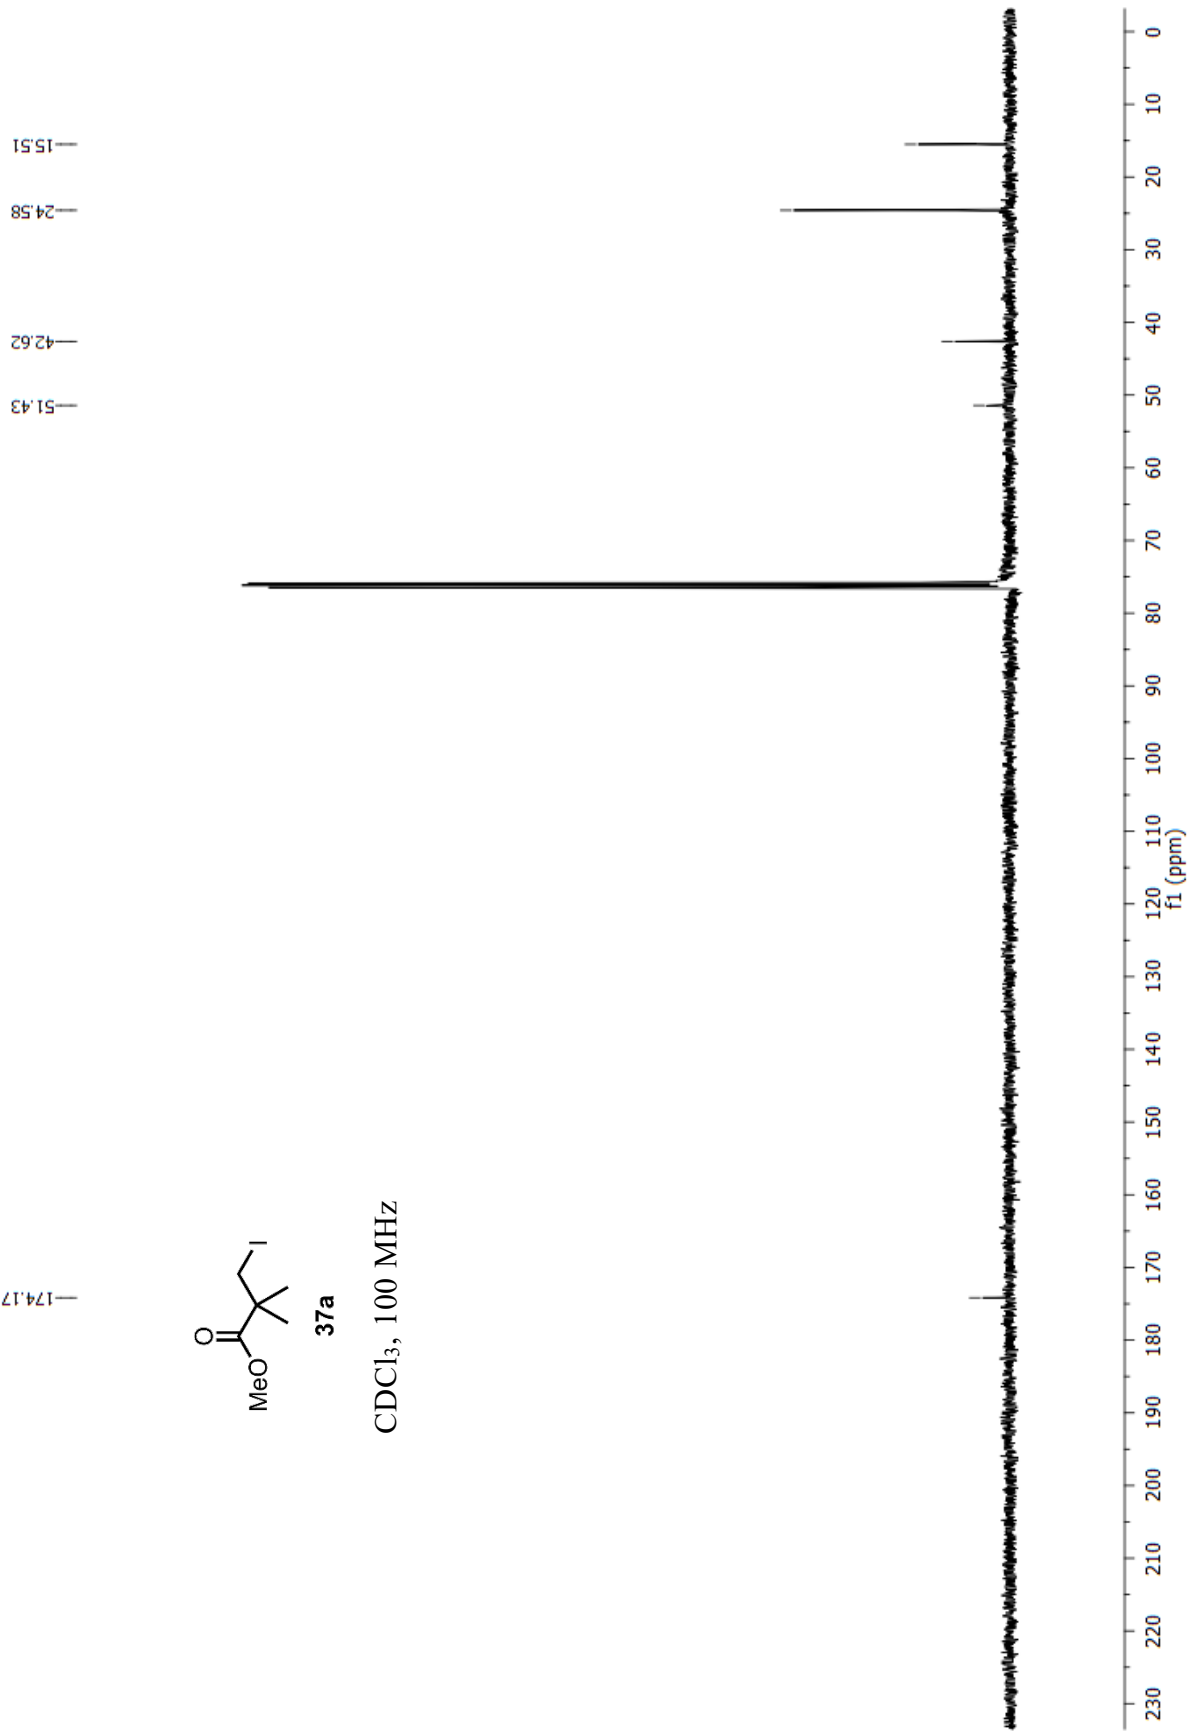

## X-Ray Data

A yellow plate like crystal was mounted on a XtaLAB Synergy, Dualflex, HyPix diffractometer employing mirror monochromated Mo K $\alpha$  radiation generated from a micro-focus sealed X-ray tube. Cell constants were obtained from a least squares refinement against 7049 reflections located between 5.53 and 70.69° 2 $\theta$ . Data were collected at 99.95(15) Kelvin.

The structure was solved in the triclinic space group *P*-1 by direct methods with SHELXT,<sup>[9]</sup> and extended and refined with SHELXL-2016/6.<sup>[9]</sup> The non-hydrogen atoms in the asymmetric unit were modelled with anisotropic displacement parameters. A riding atom model with group displacement parameters was used for the hydrogen atoms.

**Table S6. Crystal data and structure refinement details for 1.**

|                                 |                                       |                        |
|---------------------------------|---------------------------------------|------------------------|
| Identification code             | shelx                                 |                        |
| Empirical formula               | C18 H20 Cl N3 O Pd                    |                        |
| Formula weight                  | 436.22                                |                        |
| Temperature                     | 99.95(15) K                           |                        |
| Wavelength                      | 0.71073 Å                             |                        |
| Crystal system                  | Triclinic                             |                        |
| Space group                     | P -1                                  |                        |
| Unit cell dimensions            | a = 7.5074(4) Å                       | $\alpha$ = 70.420(4)°. |
|                                 | b = 11.2005(6) Å                      | $\beta$ = 78.131(4)°.  |
|                                 | c = 11.2581(5) Å                      | $\gamma$ = 84.462(4)°. |
| Volume                          | 872.46(8) Å <sup>3</sup>              |                        |
| Z                               | 2                                     |                        |
| Density (calculated)            | 1.661 Mg/m <sup>3</sup>               |                        |
| Absorption coefficient          | 1.226 mm <sup>-1</sup>                |                        |
| F(000)                          | 440                                   |                        |
| Crystal size                    | 0.306 x 0.198 x 0.016 mm <sup>3</sup> |                        |
| Theta range for data collection | 2.774 to 37.213°.                     |                        |
| Index ranges                    | -12<=h<=12, -18<=k<=15, -18<=l<=19    |                        |
| Reflections collected           | 19203                                 |                        |
| Independent reflections         | 8018 [R(int) = 0.0455]                |                        |
| Completeness to theta = 25.242° | 99.7 %                                |                        |
| Absorption correction           | Gaussian                              |                        |

|                                   |                                             |
|-----------------------------------|---------------------------------------------|
| Max. and min. transmission        | 1.000 and 0.580                             |
| Refinement method                 | Full-matrix least-squares on F <sup>2</sup> |
| Data / restraints / parameters    | 8018 / 0 / 220                              |
| Goodness-of-fit on F <sup>2</sup> | 1.060                                       |
| Final R indices [I>2sigma(I)]     | R1 = 0.0500, wR2 = 0.1073                   |
| R indices (all data)              | R1 = 0.0686, wR2 = 0.1152                   |
| Extinction coefficient            | n/a                                         |
| Largest diff. peak and hole       | 1.720 and -2.367 e.Å <sup>-3</sup>          |

**Table S7. Atomic coordinates ( x 10<sup>4</sup>) and equivalent isotropic displacement parameters (Å<sup>2</sup>x 10<sup>3</sup>) for 1. U(eq) is defined as one third of the trace of the orthogonalized U<sup>ij</sup> tensor.**

|       | x        | y       | z       | U(eq) |
|-------|----------|---------|---------|-------|
| C(1)  | 8244(4)  | 4777(2) | 4072(3) | 25(1) |
| C(2)  | 9285(4)  | 5007(2) | 2841(3) | 29(1) |
| C(3)  | 10031(4) | 6159(2) | 2213(3) | 26(1) |
| C(4)  | 9752(3)  | 7120(2) | 2810(2) | 23(1) |
| C(5)  | 10449(3) | 8344(2) | 2251(2) | 24(1) |
| C(6)  | 10179(4) | 9199(2) | 2918(3) | 25(1) |
| C(7)  | 9156(4)  | 8867(2) | 4172(2) | 24(1) |
| C(8)  | 8379(3)  | 7693(2) | 4771(2) | 21(1) |
| C(9)  | 8705(3)  | 6800(2) | 4070(2) | 20(1) |
| C(10) | 6708(4)  | 7984(2) | 6768(2) | 23(1) |
| C(11) | 5349(4)  | 7302(2) | 7968(2) | 24(1) |
| C(12) | 5253(4)  | 5880(2) | 8140(3) | 29(1) |
| C(13) | 3466(4)  | 7980(2) | 7799(3) | 26(1) |
| C(14) | 2860(4)  | 8037(3) | 6571(3) | 31(1) |
| C(15) | 5890(4)  | 7497(3) | 9140(2) | 28(1) |
| C(16) | 7816(4)  | 7014(3) | 9358(3) | 38(1) |
| C(17) | 5181(4)  | 2706(2) | 7304(3) | 25(1) |
| C(18) | 4708(4)  | 1388(2) | 7605(3) | 33(1) |
| N(1)  | 7947(3)  | 5630(2) | 4681(2) | 23(1) |
| N(2)  | 7277(3)  | 7260(2) | 5977(2) | 22(1) |
| N(3)  | 5549(3)  | 3736(2) | 7070(2) | 24(1) |
| O(1)  | 7166(3)  | 9077(2) | 6544(2) | 29(1) |
| Pd(1) | 6418(1)  | 5526(1) | 6511(1) | 21(1) |
| Cl(1) | 11694(1) | 8788(1) | 688(1)  | 31(1) |



**Table S8. Bond lengths [Å] and angles [°] for 1.**

---

|              |          |
|--------------|----------|
| C(1)-N(1)    | 1.330(3) |
| C(1)-C(2)    | 1.398(4) |
| C(1)-H(1)    | 0.9300   |
| C(2)-C(3)    | 1.357(4) |
| C(2)-H(2)    | 0.9300   |
| C(3)-C(4)    | 1.428(3) |
| C(3)-H(3)    | 0.9300   |
| C(4)-C(5)    | 1.404(4) |
| C(4)-C(9)    | 1.419(4) |
| C(5)-C(6)    | 1.381(3) |
| C(5)-Cl(1)   | 1.745(3) |
| C(6)-C(7)    | 1.406(4) |
| C(6)-H(6)    | 0.9300   |
| C(7)-C(8)    | 1.384(3) |
| C(7)-H(7)    | 0.9300   |
| C(8)-N(2)    | 1.391(3) |
| C(8)-C(9)    | 1.445(3) |
| C(9)-N(1)    | 1.376(3) |
| C(10)-O(1)   | 1.233(3) |
| C(10)-N(2)   | 1.377(3) |
| C(10)-C(11)  | 1.530(4) |
| C(11)-C(15)  | 1.545(3) |
| C(11)-C(12)  | 1.546(3) |
| C(11)-C(13)  | 1.555(4) |
| C(12)-Pd(1)  | 2.012(3) |
| C(12)-H(12A) | 0.9700   |
| C(12)-H(12B) | 0.9700   |
| C(13)-C(14)  | 1.522(4) |
| C(13)-H(13A) | 0.9700   |
| C(13)-H(13B) | 0.9700   |
| C(14)-H(14A) | 0.9600   |
| C(14)-H(14B) | 0.9600   |
| C(14)-H(14C) | 0.9600   |
| C(15)-C(16)  | 1.532(4) |
| C(15)-H(15A) | 0.9700   |
| C(15)-H(15B) | 0.9700   |

|                 |            |
|-----------------|------------|
| C(16)-H(16A)    | 0.9600     |
| C(16)-H(16B)    | 0.9600     |
| C(16)-H(16C)    | 0.9600     |
| C(17)-N(3)      | 1.141(3)   |
| C(17)-C(18)     | 1.462(3)   |
| C(18)-H(18A)    | 0.9600     |
| C(18)-H(18B)    | 0.9600     |
| C(18)-H(18C)    | 0.9600     |
| N(1)-Pd(1)      | 2.113(2)   |
| N(2)-Pd(1)      | 1.963(2)   |
| N(3)-Pd(1)      | 2.020(2)   |
|                 |            |
| N(1)-C(1)-C(2)  | 123.4(2)   |
| N(1)-C(1)-H(1)  | 118.3      |
| C(2)-C(1)-H(1)  | 118.3      |
| C(3)-C(2)-C(1)  | 119.3(2)   |
| C(3)-C(2)-H(2)  | 120.4      |
| C(1)-C(2)-H(2)  | 120.4      |
| C(2)-C(3)-C(4)  | 120.1(3)   |
| C(2)-C(3)-H(3)  | 119.9      |
| C(4)-C(3)-H(3)  | 119.9      |
| C(5)-C(4)-C(9)  | 118.0(2)   |
| C(5)-C(4)-C(3)  | 125.0(2)   |
| C(9)-C(4)-C(3)  | 117.0(2)   |
| C(6)-C(5)-C(4)  | 121.3(2)   |
| C(6)-C(5)-Cl(1) | 119.3(2)   |
| C(4)-C(5)-Cl(1) | 119.42(19) |
| C(5)-C(6)-C(7)  | 120.2(2)   |
| C(5)-C(6)-H(6)  | 119.9      |
| C(7)-C(6)-H(6)  | 119.9      |
| C(8)-C(7)-C(6)  | 121.8(2)   |
| C(8)-C(7)-H(7)  | 119.1      |
| C(6)-C(7)-H(7)  | 119.1      |
| C(7)-C(8)-N(2)  | 127.9(2)   |
| C(7)-C(8)-C(9)  | 117.2(2)   |
| N(2)-C(8)-C(9)  | 114.9(2)   |
| N(1)-C(9)-C(4)  | 121.8(2)   |
| N(1)-C(9)-C(8)  | 116.8(2)   |

|                     |            |
|---------------------|------------|
| C(4)-C(9)-C(8)      | 121.4(2)   |
| O(1)-C(10)-N(2)     | 125.3(2)   |
| O(1)-C(10)-C(11)    | 122.2(2)   |
| N(2)-C(10)-C(11)    | 112.5(2)   |
| C(10)-C(11)-C(15)   | 108.4(2)   |
| C(10)-C(11)-C(12)   | 111.9(2)   |
| C(15)-C(11)-C(12)   | 111.6(2)   |
| C(10)-C(11)-C(13)   | 106.48(19) |
| C(15)-C(11)-C(13)   | 107.9(2)   |
| C(12)-C(11)-C(13)   | 110.3(2)   |
| C(11)-C(12)-Pd(1)   | 110.67(18) |
| C(11)-C(12)-H(12A)  | 109.5      |
| Pd(1)-C(12)-H(12A)  | 109.5      |
| C(11)-C(12)-H(12B)  | 109.5      |
| Pd(1)-C(12)-H(12B)  | 109.5      |
| H(12A)-C(12)-H(12B) | 108.1      |
| C(14)-C(13)-C(11)   | 114.4(2)   |
| C(14)-C(13)-H(13A)  | 108.7      |
| C(11)-C(13)-H(13A)  | 108.7      |
| C(14)-C(13)-H(13B)  | 108.7      |
| C(11)-C(13)-H(13B)  | 108.7      |
| H(13A)-C(13)-H(13B) | 107.6      |
| C(13)-C(14)-H(14A)  | 109.5      |
| C(13)-C(14)-H(14B)  | 109.5      |
| H(14A)-C(14)-H(14B) | 109.5      |
| C(13)-C(14)-H(14C)  | 109.5      |
| H(14A)-C(14)-H(14C) | 109.5      |
| H(14B)-C(14)-H(14C) | 109.5      |
| C(16)-C(15)-C(11)   | 114.8(2)   |
| C(16)-C(15)-H(15A)  | 108.6      |
| C(11)-C(15)-H(15A)  | 108.6      |
| C(16)-C(15)-H(15B)  | 108.6      |
| C(11)-C(15)-H(15B)  | 108.6      |
| H(15A)-C(15)-H(15B) | 107.5      |
| C(15)-C(16)-H(16A)  | 109.5      |
| C(15)-C(16)-H(16B)  | 109.5      |
| H(16A)-C(16)-H(16B) | 109.5      |
| C(15)-C(16)-H(16C)  | 109.5      |

|                     |            |
|---------------------|------------|
| H(16A)-C(16)-H(16C) | 109.5      |
| H(16B)-C(16)-H(16C) | 109.5      |
| N(3)-C(17)-C(18)    | 179.9(4)   |
| C(17)-C(18)-H(18A)  | 109.5      |
| C(17)-C(18)-H(18B)  | 109.5      |
| H(18A)-C(18)-H(18B) | 109.5      |
| C(17)-C(18)-H(18C)  | 109.5      |
| H(18A)-C(18)-H(18C) | 109.5      |
| H(18B)-C(18)-H(18C) | 109.5      |
| C(1)-N(1)-C(9)      | 118.4(2)   |
| C(1)-N(1)-Pd(1)     | 130.61(19) |
| C(9)-N(1)-Pd(1)     | 110.98(15) |
| C(10)-N(2)-C(8)     | 124.3(2)   |
| C(10)-N(2)-Pd(1)    | 119.30(17) |
| C(8)-N(2)-Pd(1)     | 116.36(15) |
| C(17)-N(3)-Pd(1)    | 173.9(2)   |
| N(2)-Pd(1)-C(12)    | 83.74(10)  |
| N(2)-Pd(1)-N(3)     | 179.56(8)  |
| C(12)-Pd(1)-N(3)    | 96.12(10)  |
| N(2)-Pd(1)-N(1)     | 81.00(8)   |
| C(12)-Pd(1)-N(1)    | 164.65(10) |
| N(3)-Pd(1)-N(1)     | 99.13(8)   |

---

**Table S9. Anisotropic displacement parameters ( $\text{\AA}^2 \times 10^3$ ) for 1. The anisotropic displacement factor exponent takes the form:  $-2\pi^2 [ h^2 a^{*2} U^{11} + \dots + 2 h k a^* b^* U^{12} ]$**

|       | U <sup>11</sup> | U <sup>22</sup> | U <sup>33</sup> | U <sup>23</sup> | U <sup>13</sup> | U <sup>12</sup> |
|-------|-----------------|-----------------|-----------------|-----------------|-----------------|-----------------|
| C(1)  | 26(1)           | 21(1)           | 35(1)           | -15(1)          | -13(1)          | 5(1)            |
| C(2)  | 33(1)           | 28(1)           | 34(1)           | -21(1)          | -13(1)          | 9(1)            |
| C(3)  | 25(1)           | 32(1)           | 29(1)           | -19(1)          | -11(1)          | 9(1)            |
| C(4)  | 20(1)           | 25(1)           | 30(1)           | -14(1)          | -11(1)          | 7(1)            |
| C(5)  | 19(1)           | 30(1)           | 25(1)           | -12(1)          | -6(1)           | 2(1)            |
| C(6)  | 25(1)           | 25(1)           | 29(1)           | -12(1)          | -7(1)           | 1(1)            |
| C(7)  | 26(1)           | 22(1)           | 28(1)           | -12(1)          | -7(1)           | 2(1)            |
| C(8)  | 23(1)           | 19(1)           | 26(1)           | -13(1)          | -9(1)           | 5(1)            |
| C(9)  | 20(1)           | 21(1)           | 25(1)           | -12(1)          | -10(1)          | 6(1)            |
| C(10) | 25(1)           | 22(1)           | 26(1)           | -13(1)          | -8(1)           | 3(1)            |
| C(11) | 27(1)           | 21(1)           | 26(1)           | -11(1)          | -6(1)           | 2(1)            |
| C(12) | 34(1)           | 23(1)           | 27(1)           | -9(1)           | -4(1)           | 4(1)            |
| C(13) | 27(1)           | 23(1)           | 29(1)           | -11(1)          | -5(1)           | 1(1)            |
| C(14) | 31(1)           | 30(1)           | 36(1)           | -14(1)          | -12(1)          | 2(1)            |
| C(15) | 30(1)           | 31(1)           | 24(1)           | -12(1)          | -6(1)           | 1(1)            |
| C(16) | 35(2)           | 47(2)           | 36(2)           | -16(1)          | -14(1)          | 4(1)            |
| C(17) | 24(1)           | 21(1)           | 31(1)           | -10(1)          | -10(1)          | 5(1)            |
| C(18) | 31(1)           | 20(1)           | 52(2)           | -13(1)          | -15(1)          | 3(1)            |
| N(1)  | 24(1)           | 19(1)           | 31(1)           | -13(1)          | -11(1)          | 5(1)            |
| N(2)  | 25(1)           | 17(1)           | 25(1)           | -10(1)          | -4(1)           | 2(1)            |
| N(3)  | 24(1)           | 20(1)           | 30(1)           | -11(1)          | -10(1)          | 5(1)            |
| O(1)  | 38(1)           | 22(1)           | 31(1)           | -16(1)          | -2(1)           | -4(1)           |
| Pd(1) | 22(1)           | 16(1)           | 27(1)           | -10(1)          | -8(1)           | 3(1)            |
| Cl(1) | 29(1)           | 36(1)           | 26(1)           | -11(1)          | -4(1)           | 4(1)            |

**Table S10. Hydrogen coordinates (x 104) and isotropic displacement parameters ( $\text{\AA}^2 \times 10^3$ ) for 1.**

|        | x     | y    | z     | U(eq) |
|--------|-------|------|-------|-------|
| H(1)   | 7732  | 3986 | 4487  | 30    |
| H(2)   | 9466  | 4378 | 2455  | 34    |
| H(3)   | 10724 | 6322 | 1393  | 32    |
| H(6)   | 10675 | 9998 | 2537  | 31    |
| H(7)   | 8998  | 9452 | 4610  | 29    |
| H(12A) | 3990  | 5637 | 8373  | 34    |
| H(12B) | 5872  | 5378 | 8829  | 34    |
| H(13A) | 2557  | 7543 | 8525  | 31    |
| H(13B) | 3516  | 8838 | 7810  | 31    |
| H(14A) | 3597  | 8620 | 5849  | 46    |
| H(14B) | 1606  | 8317 | 6610  | 46    |
| H(14C) | 2996  | 7210 | 6479  | 46    |
| H(15A) | 5789  | 8395 | 9036  | 33    |
| H(15B) | 5027  | 7069 | 9902  | 33    |
| H(16A) | 7931  | 6123 | 9473  | 57    |
| H(16B) | 8034  | 7158 | 10109 | 57    |
| H(16C) | 8689  | 7460 | 8627  | 57    |
| H(18A) | 3618  | 1364 | 7294  | 49    |
| H(18B) | 4511  | 979  | 8517  | 49    |
| H(18C) | 5685  | 956  | 7201  | 49    |

**Table S11: Torsion angles [°] for 1**

---

|                         |             |
|-------------------------|-------------|
| N(1)-C(1)-C(2)-C(3)     | -0.6(4)     |
| C(1)-C(2)-C(3)-C(4)     | 0.1(4)      |
| C(2)-C(3)-C(4)-C(5)     | -179.7(2)   |
| C(2)-C(3)-C(4)-C(9)     | 1.0(3)      |
| C(9)-C(4)-C(5)-C(6)     | 2.1(3)      |
| C(3)-C(4)-C(5)-C(6)     | -177.2(2)   |
| C(9)-C(4)-C(5)-Cl(1)    | -178.37(17) |
| C(3)-C(4)-C(5)-Cl(1)    | 2.4(3)      |
| C(4)-C(5)-C(6)-C(7)     | -1.4(4)     |
| Cl(1)-C(5)-C(6)-C(7)    | 179.02(19)  |
| C(5)-C(6)-C(7)-C(8)     | -0.6(4)     |
| C(6)-C(7)-C(8)-N(2)     | -177.0(2)   |
| C(6)-C(7)-C(8)-C(9)     | 1.8(4)      |
| C(5)-C(4)-C(9)-N(1)     | 179.0(2)    |
| C(3)-C(4)-C(9)-N(1)     | -1.7(3)     |
| C(5)-C(4)-C(9)-C(8)     | -0.8(3)     |
| C(3)-C(4)-C(9)-C(8)     | 178.5(2)    |
| C(7)-C(8)-C(9)-N(1)     | 179.1(2)    |
| N(2)-C(8)-C(9)-N(1)     | -1.9(3)     |
| C(7)-C(8)-C(9)-C(4)     | -1.1(3)     |
| N(2)-C(8)-C(9)-C(4)     | 177.9(2)    |
| O(1)-C(10)-C(11)-C(15)  | -46.9(3)    |
| N(2)-C(10)-C(11)-C(15)  | 135.4(2)    |
| O(1)-C(10)-C(11)-C(12)  | -170.4(2)   |
| N(2)-C(10)-C(11)-C(12)  | 11.9(3)     |
| O(1)-C(10)-C(11)-C(13)  | 69.0(3)     |
| N(2)-C(10)-C(11)-C(13)  | -108.7(2)   |
| C(10)-C(11)-C(12)-Pd(1) | -15.1(3)    |
| C(15)-C(11)-C(12)-Pd(1) | -136.78(19) |
| C(13)-C(11)-C(12)-Pd(1) | 103.3(2)    |
| C(10)-C(11)-C(13)-C(14) | 55.5(3)     |
| C(15)-C(11)-C(13)-C(14) | 171.8(2)    |
| C(12)-C(11)-C(13)-C(14) | -66.1(3)    |
| C(10)-C(11)-C(15)-C(16) | -58.6(3)    |
| C(12)-C(11)-C(15)-C(16) | 65.1(3)     |
| C(13)-C(11)-C(15)-C(16) | -173.5(2)   |

|                        |             |
|------------------------|-------------|
| C(2)-C(1)-N(1)-C(9)    | -0.1(4)     |
| C(2)-C(1)-N(1)-Pd(1)   | 179.16(18)  |
| C(4)-C(9)-N(1)-C(1)    | 1.3(3)      |
| C(8)-C(9)-N(1)-C(1)    | -178.9(2)   |
| C(4)-C(9)-N(1)-Pd(1)   | -178.10(17) |
| C(8)-C(9)-N(1)-Pd(1)   | 1.7(2)      |
| O(1)-C(10)-N(2)-C(8)   | -3.7(4)     |
| C(11)-C(10)-N(2)-C(8)  | 173.9(2)    |
| O(1)-C(10)-N(2)-Pd(1)  | 179.3(2)    |
| C(11)-C(10)-N(2)-Pd(1) | -3.1(3)     |
| C(7)-C(8)-N(2)-C(10)   | 2.9(4)      |
| C(9)-C(8)-N(2)-C(10)   | -175.9(2)   |
| C(7)-C(8)-N(2)-Pd(1)   | 180.0(2)    |
| C(9)-C(8)-N(2)-Pd(1)   | 1.2(3)      |

---
